# Supplementary material for: Impact of peatlands on carbon dioxide (CO 2 ) emissions from the Rajang River and Estuary, Malaysia
Source: Copernicus journal article supplement (doi:10.5194/bg-2018-391), 2018-09-06
Supplement: Supplementary file 1 [file bg-2018-391-supplement.zip]

Archive with 2 entries (2 files):
- supplement.pdf
- SupplementaryTable.xlsx
