# Supplementary material for: Impact of peatlands on carbon dioxide (CO 2 ) emissions from the Rajang River and Estuary, Malaysia
Source: Copernicus journal article supplement (doi:10.5194/bg-2018-391), 2018-09-06
Supplement: Supplementary file 1 [file SupplementaryTable.xlsx]

## Sheet: Readme
This Excel workbook contains CO2, O2 and ancillary data for both the wet season (January 2016) and dry season (August 2016) survey.
For questions please contact Denise Müller-Dum at dmueller@iup.physik.uni-bremen.de
We would appreciate if you let us know in case you use this data for your own publications!

## Sheet: Jan2016_CO2 and CO2 flux
Time	Longitude (interp)	Latitude (interp)	Salinity (interp)	CO2 (ppm)	Instrument	T in equil.water (C)	T in water (WTW interp./C)	ambient pressure (atm)	pCO2 (corr./ uatm)	K_CO2 (mol L-1 atm-1)	Schmidt number for freshwater	Schmidt number for saltwater	Schmidt number	k_T	Flux (gC/m2d)	Location
15/01/2016 23:46	111.576	2.19155	0	4289.02	FTIR	27.98	28.02	0.9962	4121.97	0.03136	404.464	451.888	404.464	10.0287	3.37079	Rajang
15/01/2016 23:51	111.589	2.18776	0	4463.48	FTIR	27.95	28	0.9963	4292.25	0.03138	404.859	452.325	404.859	10.0238	3.52551	Rajang
15/01/2016 23:56	111.594	2.17417	0	4537.81	FTIR	27.94	28	0.9963	4365.45	0.03138	404.859	452.325	404.859	10.0238	3.59182	Rajang
16/01/2016 00:02	111.6	2.16104	0	4598.38	FTIR	27.94	28	0.9963	4423.33	0.03138	404.859	452.325	404.859	10.0238	3.64426	Rajang
16/01/2016 00:07	111.615	2.16134	0	4660.96	FTIR	27.93	28	0.9965	4485.52	0.03138	404.859	452.325	404.859	10.0238	3.70052	Rajang
16/01/2016 00:12	111.629	2.16765	0	4683.06	FTIR	27.92	28	0.9966	4510.75	0.03138	404.859	452.325	404.859	10.0238	3.72334	Rajang
16/01/2016 00:17	111.634	2.1795	0	4617.38	FTIR	27.88	27.91	0.9966	4437.41	0.03145	406.639	454.295	406.639	10.0018	3.65703	Rajang
16/01/2016 01:06	111.674	2.26568	0	3380.87	FTIR	27.57	27.6	0.9971	3253.62	0.03171	412.832	461.147	412.832	9.92654	2.58616	Rajang
16/01/2016 01:11	111.672	2.27966	0	3393.76	FTIR	27.56	27.6	0.9972	3266.91	0.03171	412.832	461.147	412.832	9.92654	2.59817	Main stem
16/01/2016 01:16	111.679	2.28935	0	3375.03	FTIR	27.55	27.6	0.9972	3250.42	0.03171	412.832	461.147	412.832	9.92654	2.58323	Main stem
16/01/2016 01:21	111.692	2.28892	0	3358.85	FTIR	27.57	27.6	0.9972	3232.68	0.03171	412.832	461.147	412.832	9.92654	2.56714	Main stem
16/01/2016 01:26	111.705	2.28512	0	3346.94	FTIR	27.58	27.68	0.9972	3230.04	0.03164	411.225	459.369	411.225	9.94592	2.56409	Main stem
16/01/2016 01:31	111.718	2.27917	0	3336.74	FTIR	27.57	27.7	0.9971	3224.76	0.03162	410.824	458.925	410.824	9.95077	2.55897	Main stem
16/01/2016 01:36	111.731	2.2767	0	3186.14	FTIR	27.59	27.7	0.9971	3075.64	0.03162	410.824	458.925	410.824	9.95077	2.42384	Main stem
16/01/2016 02:56	111.818	2.24581	0	2948.55	FTIR	27.5	27.6	0.9975	2847	0.03171	412.832	461.147	412.832	9.92654	2.2174	Main stem
16/01/2016 03:01	111.818	2.24674	0	3257.3	FTIR	27.51	27.6	0.9975	3144.86	0.03171	412.832	461.147	412.832	9.92654	2.48742	Main stem
16/01/2016 03:06	111.812	2.25459	0	3351.94	FTIR	27.5	27.6	0.9973	3236.71	0.03171	412.832	461.147	412.832	9.92654	2.57076	Main stem
16/01/2016 03:11	111.808	2.26723	0	3387.9	FTIR	27.52	27.6	0.9972	3267.74	0.03171	412.832	461.147	412.832	9.92654	2.59893	Main stem
16/01/2016 03:16	111.811	2.28047	0	3392.46	FTIR	27.52	27.6	0.9972	3271.9	0.03171	412.832	461.147	412.832	9.92654	2.6027	Main stem
16/01/2016 03:21	111.821	2.28607	0	3384.48	FTIR	27.53	27.65	0.9971	3269.26	0.03167	411.827	460.035	411.827	9.93865	2.60023	Main stem
16/01/2016 03:26	111.833	2.28133	0	3340.16	FTIR	27.57	27.7	0.9971	3227.15	0.03162	410.824	458.925	410.824	9.95077	2.56113	Main stem
16/01/2016 03:31	111.836	2.27033	0	3310.97	FTIR	27.59	27.65	0.9971	3189.65	0.03167	411.827	460.035	411.827	9.93865	2.52806	Main stem
16/01/2016 03:36	111.835	2.25818	0	3267.51	FTIR	27.58	27.6	0.997	3142.51	0.03171	412.832	461.147	412.832	9.92654	2.48547	Main stem
16/01/2016 03:41	111.832	2.2461	0	3214.93	FTIR	27.54	27.6	0.9971	3097.1	0.03171	412.832	461.147	412.832	9.92654	2.44427	Main stem
16/01/2016 03:46	111.84	2.23793	0	3135.46	FTIR	27.55	27.6	0.9969	3018.8	0.03171	412.832	461.147	412.832	9.92654	2.37336	Main stem
16/01/2016 03:51	111.85	2.23459	0	3034.07	FTIR	27.53	27.6	0.9969	2923.91	0.03171	412.832	461.147	412.832	9.92654	2.28734	Main stem
16/01/2016 04:12	111.846	2.2343	0	2994.07	FTIR	27.53	27.6	0.9969	2884.63	0.03171	412.832	461.147	412.832	9.92654	2.25173	Main stem
16/01/2016 04:17	111.846	2.23437	0	2754.17	FTIR	27.6	27.68	0.9969	2654.15	0.03164	411.225	459.369	411.225	9.94592	2.04226	Main stem
16/01/2016 04:22	111.846	2.23419	0	2491.81	FTIR	27.62	27.78	0.9969	2409.59	0.03156	409.225	457.155	409.225	9.9702	1.82045	Main stem
16/01/2016 04:27	111.847	2.23372	0	2322.56	FTIR	27.69	27.72	0.9968	2233.09	0.03161	410.424	458.482	410.424	9.95563	1.66073	Main stem
16/01/2016 04:32	111.85	2.23413	0	2553.75	FTIR	27.66	27.7	0.9968	2456.87	0.03162	410.824	458.925	410.824	9.95077	1.86323	Main stem
16/01/2016 04:37	111.855	2.23372	0	2870.92	FTIR	27.57	27.7	0.9968	2773.31	0.03162	410.824	458.925	410.824	9.95077	2.14998	Main stem
16/01/2016 04:45	111.874	2.23425	0	2882.33	FTIR	27.68	27.72	0.9966	2772.77	0.0316	410.424	458.482	410.424	9.95563	2.14925	Main stem
16/01/2016 04:50	111.885	2.23166	0	2712.57	FTIR	27.65	27.74	0.9965	2613.95	0.03159	410.024	458.039	410.024	9.96048	2.00574	Main stem
16/01/2016 05:11	111.908	2.21467	0	2231.85	FTIR	27.73	27.81	0.9962	2149.14	0.03154	408.627	456.494	408.627	9.9775	1.58483	Main stem
16/01/2016 05:16	111.915	2.20601	0	2415.97	FTIR	27.73	27.83	0.9962	2328.18	0.03152	408.228	456.053	408.228	9.98236	1.74684	Main stem
16/01/2016 05:21	111.922	2.19803	0	2481.07	FTIR	27.78	27.84	0.9962	2386.77	0.03151	408.029	455.833	408.029	9.9848	1.7998	Main stem
16/01/2016 05:26	111.931	2.1916	0	2490.63	FTIR	27.82	27.86	0.996	2392.03	0.03149	407.632	455.393	407.632	9.98966	1.80437	Main stem
16/01/2016 05:31	111.94	2.18533	0	2637.78	FTIR	27.89	27.88	0.9959	2526.36	0.03148	407.234	454.953	407.234	9.99454	1.92644	Main stem
16/01/2016 05:37	111.947	2.17611	0	2352.07	FTIR	27.89	27.9	0.9958	2254.5	0.03147	406.837	454.514	406.837	9.99941	1.68042	Main stem
17/01/2016 00:31	112.225	2.07696	0	2880	LI820	27.75	27.8	0.998	2774.59	0.03154	408.826	456.714	408.826	9.97506	2.1505	Main stem
17/01/2016 00:32	112.227	2.0762	0	2875.12	LI820	27.75	27.8	0.998	2770.24	0.03154	408.826	456.714	408.826	9.97506	2.14656	Main stem
17/01/2016 00:33	112.228	2.07572	0	2897.48	LI820	27.75	27.8	0.998	2791.75	0.03154	408.826	456.714	408.826	9.97506	2.16605	Main stem
17/01/2016 00:34	112.23	2.07521	0	2897.48	LI820	27.76	27.8	0.998	2791.36	0.03154	408.826	456.714	408.826	9.97506	2.1657	Main stem
17/01/2016 00:35	112.231	2.0747	0	2897.48	LI820	27.76	27.8	0.998	2791.16	0.03154	408.826	456.714	408.826	9.97506	2.16551	Main stem
17/01/2016 00:36	112.232	2.07432	0	2897.48	LI820	27.75	27.8	0.998	2792.13	0.03154	408.826	456.714	408.826	9.97506	2.16639	Main stem
17/01/2016 00:37	112.234	2.07384	0	2897.48	LI820	27.75	27.8	0.998	2791.81	0.03154	408.826	456.714	408.826	9.97506	2.1661	Main stem
17/01/2016 00:38	112.235	2.07327	0	2897.48	LI820	27.75	27.8	0.998	2791.67	0.03154	408.826	456.714	408.826	9.97506	2.16598	Main stem
17/01/2016 00:39	112.237	2.07269	0	2882.64	LI820	27.75	27.8	0.9981	2778.1	0.03154	408.826	456.714	408.826	9.97506	2.15365	Main stem
17/01/2016 00:40	112.238	2.07195	0	2877.56	LI820	27.75	27.8	0.9981	2772.85	0.03154	408.826	456.714	408.826	9.97506	2.14889	Main stem
17/01/2016 00:41	112.24	2.07121	0	2872.68	LI820	27.75	27.8	0.9981	2768.55	0.03154	408.826	456.714	408.826	9.97506	2.14499	Main stem
17/01/2016 00:42	112.241	2.07024	0	2889.96	LI820	27.75	27.8	0.9981	2784.79	0.03154	408.826	456.714	408.826	9.97506	2.15971	Main stem
17/01/2016 00:43	112.243	2.06915	0	2870.04	LI820	27.75	27.8	0.9981	2766.18	0.03154	408.826	456.714	408.826	9.97506	2.14284	Main stem
17/01/2016 00:44	112.244	2.06799	0	2857.64	LI820	27.74	27.8	0.9981	2754.98	0.03154	408.826	456.714	408.826	9.97506	2.1327	Main stem
17/01/2016 00:45	112.245	2.06691	0	2825.32	LI820	27.73	27.8	0.9981	2724.61	0.03154	408.826	456.714	408.826	9.97506	2.10518	Main stem
17/01/2016 00:46	112.246	2.06601	0	2812.92	LI820	27.72	27.8	0.9981	2714.35	0.03154	408.826	456.714	408.826	9.97506	2.09588	Main stem
17/01/2016 00:47	112.248	2.06514	0	2818.01	LI820	27.71	27.8	0.9981	2720.71	0.03154	408.826	456.714	408.826	9.97506	2.10164	Main stem
17/01/2016 00:48	112.249	2.06431	0	2830.4	LI820	27.7	27.8	0.9981	2733.83	0.03154	408.826	456.714	408.826	9.97506	2.11353	Main stem
17/01/2016 00:49	112.251	2.06355	0	2812.92	LI820	27.7	27.8	0.9981	2716.78	0.03154	408.826	456.714	408.826	9.97506	2.09808	Main stem
17/01/2016 00:50	112.253	2.06265	0	2800.52	LI820	27.69	27.79	0.9981	2705.36	0.03155	409.025	456.935	409.025	9.97263	2.08789	Main stem
17/01/2016 00:51	112.254	2.06203	0	2800.52	LI820	27.69	27.77	0.9981	2703.07	0.03157	409.424	457.376	409.424	9.96777	2.08612	Main stem
17/01/2016 00:52	112.256	2.06162	0	2812.92	LI820	27.68	27.75	0.9981	2713.19	0.03158	409.824	457.818	409.824	9.96291	2.09493	Main stem
17/01/2016 00:53	112.258	2.06142	0	2788.13	LI820	27.69	27.73	0.9981	2686.33	0.0316	410.224	458.261	410.224	9.95805	2.0709	Main stem
17/01/2016 00:54	112.26	2.0615	0	2788.13	LI820	27.69	27.71	0.9981	2683.84	0.03161	410.624	458.703	410.624	9.9532	2.06828	Main stem
17/01/2016 00:55	112.261	2.06179	0	2780.61	LI820	27.69	27.7	0.9981	2675.5	0.03162	410.824	458.925	410.824	9.95077	2.06088	Main stem
17/01/2016 00:56	112.263	2.06237	0	2788.13	LI820	27.69	27.7	0.9981	2683.06	0.03162	410.824	458.925	410.824	9.95077	2.06773	Main stem
17/01/2016 00:57	112.265	2.06286	0	2765.77	LI820	27.68	27.7	0.9981	2662.1	0.03162	410.824	458.925	410.824	9.95077	2.04873	Main stem
17/01/2016 00:58	112.266	2.06323	0	2783.04	LI820	27.68	27.7	0.9983	2679.33	0.03162	410.824	458.925	410.824	9.95077	2.06427	Main stem
17/01/2016 00:59	112.268	2.06346	0	2783.04	LI820	27.67	27.7	0.9983	2680.54	0.03162	410.824	458.925	410.824	9.95077	2.06537	Main stem
17/01/2016 01:00	112.269	2.06341	0	2778.17	LI820	27.67	27.7	0.9983	2676.44	0.03162	410.824	458.925	410.824	9.95077	2.06166	Main stem
17/01/2016 01:01	112.271	2.06318	0	2778.17	LI820	27.66	27.7	0.9983	2677.61	0.03162	410.824	458.925	410.824	9.95077	2.06272	Main stem
17/01/2016 01:02	112.272	2.06301	0	2750.73	LI820	27.65	27.7	0.9983	2651.76	0.03162	410.824	458.925	410.824	9.95077	2.03929	Main stem
17/01/2016 01:03	112.274	2.06275	0	2743.21	LI820	27.65	27.7	0.9983	2645.07	0.03162	410.824	458.925	410.824	9.95077	2.03323	Main stem
17/01/2016 01:04	112.275	2.06227	0	2730.81	LI820	27.65	27.7	0.9983	2632.91	0.03162	410.824	458.925	410.824	9.95077	2.02221	Main stem
17/01/2016 01:05	112.277	2.06174	0	2730.81	LI820	27.64	27.7	0.9983	2634.27	0.03162	410.824	458.925	410.824	9.95077	2.02344	Main stem
17/01/2016 01:06	112.278	2.06119	0	2703.57	LI820	27.63	27.7	0.9983	2608.65	0.03162	410.824	458.925	410.824	9.95077	2.00023	Main stem
17/01/2016 01:07	112.279	2.06077	0	2703.57	LI820	27.63	27.7	0.9983	2609.09	0.03162	410.824	458.925	410.824	9.95077	2.00063	Main stem
17/01/2016 01:08	112.28	2.06134	0	2693.61	LI820	27.63	27.7	0.9983	2599.66	0.03162	410.824	458.925	410.824	9.95077	1.99208	Main stem
17/01/2016 01:09	112.281	2.06014	0	2681.21	LI820	27.64	27.7	0.9983	2586.79	0.03162	410.824	458.925	410.824	9.95077	1.98042	Main stem
17/01/2016 01:10	112.282	2.05929	0	2723.49	LI820	27.63	27.7	0.9983	2627.8	0.03162	410.824	458.925	410.824	9.95077	2.01758	Main stem
17/01/2016 01:11	112.284	2.05876	0	2706.01	LI820	27.63	27.7	0.9983	2611.13	0.03162	410.824	458.925	410.824	9.95077	2.00247	Main stem
17/01/2016 01:12	112.285	2.05838	0	2725.93	LI820	27.62	27.7	0.9983	2630.87	0.03162	410.824	458.925	410.824	9.95077	2.02036	Main stem
17/01/2016 01:13	112.287	2.0579	0	2743.21	LI820	27.62	27.7	0.9983	2647.64	0.03162	410.824	458.925	410.824	9.95077	2.03556	Main stem
17/01/2016 01:14	112.289	2.0575	0	2743.21	LI820	27.62	27.7	0.9983	2648.27	0.03162	410.824	458.925	410.824	9.95077	2.03613	Main stem
17/01/2016 01:15	112.29	2.05712	0	2743.21	LI820	27.62	27.7	0.9983	2647.74	0.03162	410.824	458.925	410.824	9.95077	2.03565	Main stem
17/01/2016 01:16	112.292	2.05682	0	2693.61	LI820	27.62	27.7	0.9984	2600.91	0.03162	410.824	458.925	410.824	9.95077	1.99318	Main stem
17/01/2016 01:17	112.294	2.05663	0	2678.57	LI820	27.61	27.7	0.9984	2586.63	0.03162	410.824	458.925	410.824	9.95077	1.98024	Main stem
17/01/2016 01:18	112.295	2.05634	0	2661.29	LI820	27.62	27.7	0.9984	2569.63	0.03162	410.824	458.925	410.824	9.95077	1.96483	Main stem
17/01/2016 01:19	112.297	2.05606	0	2708.45	LI820	27.61	27.7	0.9984	2615.79	0.03162	410.824	458.925	410.824	9.95077	2.00666	Main stem
17/01/2016 01:20	112.299	2.05563	0	2718.41	LI820	27.6	27.69	0.9984	2625.25	0.03163	411.024	459.147	411.024	9.94835	2.01538	Main stem
17/01/2016 01:21	112.3	2.05537	0	2725.93	LI820	27.6	27.67	0.9984	2630.98	0.03165	411.425	459.59	411.425	9.9435	2.02086	Main stem
17/01/2016 01:22	112.302	2.05516	0	2730.81	LI820	27.59	27.65	0.9984	2634.49	0.03166	411.827	460.035	411.827	9.93865	2.0237	Main stem
17/01/2016 01:23	112.304	2.05489	0	2730.81	LI820	27.58	27.63	0.9984	2633.11	0.03168	412.229	460.479	412.229	9.93381	2.02274	Main stem
17/01/2016 01:24	112.305	2.05465	0	2713.53	LI820	27.58	27.61	0.9984	2614.14	0.0317	412.631	460.924	412.631	9.92896	2.00583	Main stem
17/01/2016 01:25	112.307	2.05487	0	2700.93	LI820	27.59	27.6	0.9984	2600.57	0.03171	412.832	461.147	412.832	9.92654	1.99367	Main stem
17/01/2016 01:26	112.309	2.05511	0	2696.05	LI820	27.58	27.6	0.9984	2596.74	0.03171	412.832	461.147	412.832	9.92654	1.9902	Main stem
17/01/2016 01:27	112.311	2.05537	0	2708.45	LI820	27.59	27.6	0.9984	2607.22	0.03171	412.832	461.147	412.832	9.92654	1.9997	Main stem
17/01/2016 01:28	112.313	2.05562	0	2696.05	LI820	27.57	27.6	0.9984	2597.09	0.03171	412.832	461.147	412.832	9.92654	1.99052	Main stem
17/01/2016 01:29	112.314	2.0559	0	2710.89	LI820	27.57	27.6	0.9984	2611.44	0.03171	412.832	461.147	412.832	9.92654	2.00353	Main stem
17/01/2016 01:30	112.315	2.05608	0	2678.57	LI820	27.57	27.6	0.9984	2580.88	0.03171	412.832	461.147	412.832	9.92654	1.97582	Main stem
17/01/2016 01:31	112.316	2.05611	0	2696.05	LI820	27.56	27.6	0.9984	2598.53	0.03171	412.832	461.147	412.832	9.92654	1.99182	Main stem
17/01/2016 01:32	112.316	2.05619	0	2715.97	LI820	27.56	27.6	0.9984	2618.57	0.03171	412.832	461.147	412.832	9.92654	2.00999	Main stem
17/01/2016 01:33	112.318	2.05652	0	2725.93	LI820	27.55	27.6	0.9984	2628.68	0.03171	412.832	461.147	412.832	9.92654	2.01916	Main stem
17/01/2016 01:34	112.32	2.05681	0	2720.85	LI820	27.55	27.6	0.9984	2623.9	0.03171	412.832	461.147	412.832	9.92654	2.01482	Main stem
17/01/2016 01:35	112.322	2.05709	0	2713.53	LI820	27.55	27.6	0.9984	2617.03	0.03171	412.832	461.147	412.832	9.92654	2.0086	Main stem
17/01/2016 01:36	112.324	2.05714	0	2696.05	LI820	27.53	27.6	0.9983	2602.08	0.03171	412.832	461.147	412.832	9.92654	1.99508	Main stem
17/01/2016 01:37	112.325	2.05703	0	2681.21	LI820	27.53	27.6	0.9983	2588.07	0.03171	412.832	461.147	412.832	9.92654	1.98238	Main stem
17/01/2016 01:38	112.327	2.05667	0	2619.02	LI820	27.52	27.6	0.9983	2529.07	0.03171	412.832	461.147	412.832	9.92654	1.92889	Main stem
17/01/2016 01:39	112.329	2.05618	0	2631.42	LI820	27.51	27.6	0.9983	2541.54	0.03171	412.832	461.147	412.832	9.92654	1.9402	Main stem
17/01/2016 01:40	112.33	2.05553	0	2631.42	LI820	27.51	27.59	0.9983	2541.42	0.03171	413.034	461.37	413.034	9.92412	1.93962	Main stem
17/01/2016 01:41	112.332	2.05507	0	2631.42	LI820	27.5	27.57	0.9983	2539.56	0.03173	413.437	461.816	413.437	9.91929	1.93821	Main stem
17/01/2016 01:42	112.334	2.0546	0	2594.02	LI820	27.5	27.55	0.9983	2501.95	0.03175	413.84	462.262	413.84	9.91445	1.90439	Main stem
17/01/2016 01:43	112.335	2.0538	0	2546.86	LI820	27.49	27.53	0.9983	2455.06	0.03176	414.244	462.709	414.244	9.90962	1.86156	Main stem
17/01/2016 01:44	112.337	2.05292	0	2546.86	LI820	27.49	27.51	0.9983	2453.57	0.03178	414.648	463.156	414.648	9.90479	1.86047	Main stem
17/01/2016 01:45	112.338	2.05218	0	2526.94	LI820	27.49	27.5	0.9983	2432.93	0.03179	414.85	463.38	414.85	9.90237	1.84189	Main stem
17/01/2016 01:46	112.34	2.05145	0	2534.46	LI820	27.48	27.5	0.9983	2440.73	0.03179	414.85	463.38	414.85	9.90237	1.84896	Main stem
17/01/2016 01:47	112.341	2.05137	0	2504.58	LI820	27.48	27.5	0.9983	2411.51	0.03179	414.85	463.38	414.85	9.90237	1.82247	Main stem
17/01/2016 01:48	112.342	2.05216	0	2504.58	LI820	27.47	27.5	0.9983	2412.67	0.03179	414.85	463.38	414.85	9.90237	1.82352	Main stem
17/01/2016 01:49	112.342	2.05255	0	2529.38	LI820	27.51	27.5	0.9983	2432.07	0.03179	414.85	463.38	414.85	9.90237	1.84111	Main stem
17/01/2016 01:50	112.342	2.05284	0	2497.06	LI820	27.57	27.5	0.9983	2394.51	0.03179	414.85	463.38	414.85	9.90237	1.80706	Main stem
17/01/2016 02:05	112.344	2.04982	0	2730.81	LI820	27.5	27.5	0.9984	2628.05	0.03179	414.85	463.38	414.85	9.90237	2.01875	Main stem
17/01/2016 02:06	112.345	2.04895	0	2715.97	LI820	27.5	27.5	0.9984	2614.57	0.03179	414.85	463.38	414.85	9.90237	2.00653	Main stem
17/01/2016 02:07	112.347	2.0482	0	2706.01	LI820	27.49	27.5	0.9984	2606.01	0.03179	414.85	463.38	414.85	9.90237	1.99877	Main stem
17/01/2016 02:08	112.348	2.04729	0	2681.21	LI820	27.49	27.5	0.9984	2581.63	0.03179	414.85	463.38	414.85	9.90237	1.97667	Main stem
17/01/2016 02:09	112.349	2.04633	0	2681.21	LI820	27.49	27.5	0.9984	2581.22	0.03179	414.85	463.38	414.85	9.90237	1.97629	Main stem
17/01/2016 02:10	112.35	2.0457	0	2696.05	LI820	27.5	27.5	0.9984	2595.5	0.03179	414.85	463.38	414.85	9.90237	1.98924	Main stem
17/01/2016 02:11	112.352	2.045	0	2696.05	LI820	27.49	27.5	0.9984	2596.3	0.03179	414.85	463.38	414.85	9.90237	1.98997	Main stem
17/01/2016 02:12	112.353	2.04436	0	2710.89	LI820	27.49	27.5	0.9984	2610.2	0.03179	414.85	463.38	414.85	9.90237	2.00257	Main stem
17/01/2016 02:13	112.355	2.04371	0	2710.89	LI820	27.5	27.5	0.9984	2609.55	0.03179	414.85	463.38	414.85	9.90237	2.00198	Main stem
17/01/2016 02:14	112.356	2.0431	0	2693.61	LI820	27.49	27.5	0.9984	2593.87	0.03179	414.85	463.38	414.85	9.90237	1.98776	Main stem
17/01/2016 02:15	112.357	2.04266	0	2688.53	LI820	27.47	27.5	0.9984	2590.89	0.03179	414.85	463.38	414.85	9.90237	1.98506	Main stem
17/01/2016 02:16	112.359	2.0424	0	2688.53	LI820	27.47	27.5	0.9984	2590.95	0.03179	414.85	463.38	414.85	9.90237	1.98511	Main stem
17/01/2016 02:17	112.36	2.04207	0	2696.05	LI820	27.47	27.5	0.9984	2598.46	0.03179	414.85	463.38	414.85	9.90237	1.99192	Main stem
17/01/2016 02:18	112.362	2.0415	0	2696.05	LI820	27.47	27.5	0.9984	2597.76	0.03179	414.85	463.38	414.85	9.90237	1.99129	Main stem
17/01/2016 02:19	112.364	2.041	0	2681.21	LI820	27.48	27.5	0.9984	2582.81	0.03179	414.85	463.38	414.85	9.90237	1.97773	Main stem
17/01/2016 02:20	112.365	2.04041	0	2673.69	LI820	27.48	27.5	0.9984	2575.03	0.03179	414.85	463.38	414.85	9.90237	1.97068	Main stem
17/01/2016 02:21	112.367	2.03984	0	2653.77	LI820	27.48	27.5	0.9984	2555.89	0.03179	414.85	463.38	414.85	9.90237	1.95333	Main stem
17/01/2016 02:22	112.368	2.03942	0	2609.06	LI820	27.49	27.5	0.9984	2512.07	0.03179	414.85	463.38	414.85	9.90237	1.9136	Main stem
17/01/2016 02:23	112.37	2.0391	0	2596.66	LI820	27.51	27.5	0.9984	2497.74	0.03179	414.85	463.38	414.85	9.90237	1.90061	Main stem
17/01/2016 02:24	112.371	2.03869	0	2609.06	LI820	27.52	27.5	0.9984	2507.89	0.03179	414.85	463.38	414.85	9.90237	1.90981	Main stem
17/01/2016 02:25	112.373	2.03843	0	2636.29	LI820	27.53	27.5	0.9984	2532.59	0.03179	414.85	463.38	414.85	9.90237	1.9322	Main stem
17/01/2016 02:26	112.374	2.03804	0	2661.29	LI820	27.54	27.5	0.9984	2555.29	0.03179	414.85	463.38	414.85	9.90237	1.95278	Main stem
17/01/2016 02:27	112.376	2.03765	0	2681.21	LI820	27.56	27.5	0.9984	2572.55	0.03179	414.85	463.38	414.85	9.90237	1.96843	Main stem
17/01/2016 02:28	112.377	2.03725	0	2693.61	LI820	27.56	27.5	0.9984	2584.84	0.03179	414.85	463.38	414.85	9.90237	1.97958	Main stem
17/01/2016 02:29	112.379	2.0368	0	2708.45	LI820	27.57	27.5	0.9984	2598.07	0.03179	414.85	463.38	414.85	9.90237	1.99157	Main stem
17/01/2016 02:30	112.38	2.03626	0	2718.41	LI820	27.58	27.5	0.9984	2606.38	0.03179	414.85	463.38	414.85	9.90237	1.9991	Main stem
17/01/2016 02:31	112.382	2.0356	0	2725.93	LI820	27.61	27.5	0.9984	2610.92	0.03179	414.85	463.38	414.85	9.90237	2.00322	Main stem
17/01/2016 02:32	112.383	2.03501	0	2735.89	LI820	27.63	27.5	0.9984	2617.17	0.03179	414.85	463.38	414.85	9.90237	2.00889	Main stem
17/01/2016 02:33	112.385	2.03453	0	2740.77	LI820	27.66	27.5	0.9984	2619.09	0.03179	414.85	463.38	414.85	9.90237	2.01063	Main stem
17/01/2016 02:34	112.387	2.03404	0	2748.29	LI820	27.68	27.5	0.9984	2623.4	0.03179	414.85	463.38	414.85	9.90237	2.01453	Main stem
17/01/2016 02:35	112.388	2.03317	0	2755.81	LI820	27.7	27.5	0.9984	2628.84	0.03179	414.85	463.38	414.85	9.90237	2.01947	Main stem
17/01/2016 02:36	112.389	2.03203	0	2760.69	LI820	27.71	27.5	0.9984	2632.61	0.03179	414.85	463.38	414.85	9.90237	2.02288	Main stem
17/01/2016 02:37	112.391	2.03106	0	2765.77	LI820	27.71	27.5	0.9984	2636.63	0.03179	414.85	463.38	414.85	9.90237	2.02653	Main stem
17/01/2016 02:38	112.392	2.03004	0	2773.09	LI820	27.72	27.5	0.9984	2642.57	0.03179	414.85	463.38	414.85	9.90237	2.03191	Main stem
17/01/2016 02:39	112.394	2.02906	0	2780.61	LI820	27.77	27.5	0.9984	2643.65	0.03179	414.85	463.38	414.85	9.90237	2.03289	Main stem
17/01/2016 02:40	112.395	2.02818	0	2780.61	LI820	27.86	27.5	0.9984	2631.42	0.03179	414.85	463.38	414.85	9.90237	2.02181	Main stem
17/01/2016 03:05	112.436	2.03238	0	2554.38	LI820	27.48	27.52	0.9981	2461.41	0.03177	414.446	462.932	414.446	9.9072	1.86752	Main stem
17/01/2016 03:06	112.437	2.03274	0	2574.1	LI820	27.52	27.53	0.9981	2476.29	0.03177	414.244	462.709	414.244	9.90962	1.88146	Main stem
17/01/2016 03:07	112.439	2.03301	0	2594.02	LI820	27.56	27.53	0.9981	2490.79	0.03177	414.244	462.709	414.244	9.90962	1.89461	Main stem
17/01/2016 04:31	112.524	2.01781	0	2561.7	LI820	27.68	27.6	0.9967	2448.9	0.03171	412.832	461.147	412.832	9.92654	1.8568	Main stem
17/01/2016 04:32	112.526	2.01749	0	2561.7	LI820	27.66	27.6	0.9967	2450.58	0.03171	412.832	461.147	412.832	9.92654	1.85832	Main stem
17/01/2016 04:33	112.527	2.01711	0	2581.62	LI820	27.64	27.6	0.9967	2472.74	0.03171	412.832	461.147	412.832	9.92654	1.87841	Main stem
17/01/2016 04:34	112.528	2.01673	0	2586.7	LI820	27.63	27.6	0.9967	2477.84	0.03171	412.832	461.147	412.832	9.92654	1.88303	Main stem
17/01/2016 04:35	112.53	2.01643	0	2596.66	LI820	27.64	27.6	0.9967	2487.24	0.03171	412.832	461.147	412.832	9.92654	1.89156	Main stem
17/01/2016 04:36	112.531	2.01624	0	2623.89	LI820	27.66	27.6	0.9967	2509.08	0.03171	412.832	461.147	412.832	9.92654	1.91135	Main stem
17/01/2016 04:37	112.533	2.01616	0	2628.98	LI820	27.66	27.6	0.9965	2512.72	0.03171	412.832	461.147	412.832	9.92654	1.91473	Main stem
17/01/2016 04:38	112.534	2.01597	0	2643.81	LI820	27.68	27.6	0.9965	2524.25	0.03171	412.832	461.147	412.832	9.92654	1.92518	Main stem
17/01/2016 04:39	112.536	2.01562	0	2663.73	LI820	27.71	27.6	0.9965	2540.87	0.03171	412.832	461.147	412.832	9.92654	1.94025	Main stem
17/01/2016 04:40	112.537	2.01516	0	2653.77	LI820	27.71	27.61	0.9965	2531.94	0.0317	412.631	460.924	412.631	9.92896	1.93201	Main stem
17/01/2016 04:41	112.539	2.0145	0	2646.25	LI820	27.71	27.63	0.9965	2526.37	0.03168	412.229	460.479	412.229	9.93381	1.92669	Main stem
17/01/2016 04:42	112.54	2.01404	0	2691.17	LI820	27.71	27.65	0.9964	2571.49	0.03167	411.827	460.035	411.827	9.93865	1.96796	Main stem
17/01/2016 04:43	112.541	2.01369	0	2668.61	LI820	27.7	27.67	0.9964	2552.9	0.03165	411.425	459.59	411.425	9.9435	1.95082	Main stem
17/01/2016 04:44	112.543	2.01326	0	2668.61	LI820	27.7	27.69	0.9964	2554.35	0.03163	411.024	459.147	411.024	9.94835	1.95185	Main stem
17/01/2016 04:45	112.544	2.01296	0	2673.69	LI820	27.73	27.7	0.9964	2557.9	0.03162	410.824	458.925	410.824	9.95077	1.95493	Main stem
17/01/2016 04:46	112.546	2.01268	0	2678.57	LI820	27.73	27.7	0.9964	2563.5	0.03162	410.824	458.925	410.824	9.95077	1.96	Main stem
17/01/2016 04:47	112.547	2.01241	0	2668.61	LI820	27.73	27.7	0.9964	2553.5	0.03162	410.824	458.925	410.824	9.95077	1.95094	Main stem
17/01/2016 04:48	112.548	2.01218	0	2668.61	LI820	27.74	27.7	0.9964	2551.42	0.03162	410.824	458.925	410.824	9.95077	1.94906	Main stem
17/01/2016 04:49	112.55	2.01203	0	2661.29	LI820	27.75	27.7	0.9963	2543.14	0.03162	410.824	458.925	410.824	9.95077	1.94159	Main stem
17/01/2016 04:50	112.552	2.01182	0	2671.25	LI820	27.75	27.7	0.9963	2553.01	0.03162	410.824	458.925	410.824	9.95077	1.95054	Main stem
17/01/2016 04:51	112.553	2.01173	0	2663.73	LI820	27.75	27.7	0.9963	2546.82	0.03162	410.824	458.925	410.824	9.95077	1.94493	Main stem
17/01/2016 04:52	112.555	2.01154	0	2663.73	LI820	27.75	27.7	0.9963	2547.12	0.03162	410.824	458.925	410.824	9.95077	1.9452	Main stem
17/01/2016 04:53	112.556	2.01145	0	2648.9	LI820	27.73	27.7	0.9963	2535.24	0.03162	410.824	458.925	410.824	9.95077	1.93443	Main stem
17/01/2016 04:54	112.558	2.0117	0	2611.5	LI820	27.75	27.7	0.9961	2495.73	0.03162	410.824	458.925	410.824	9.95077	1.8987	Main stem
17/01/2016 04:55	112.559	2.01177	0	2601.54	LI820	27.75	27.7	0.9961	2487.22	0.03162	410.824	458.925	410.824	9.95077	1.89099	Main stem
17/01/2016 04:56	112.561	2.01172	0	2601.54	LI820	27.76	27.7	0.9961	2486.22	0.03162	410.824	458.925	410.824	9.95077	1.89009	Main stem
17/01/2016 04:57	112.563	2.01176	0	2601.54	LI820	27.77	27.7	0.9961	2483.57	0.03162	410.824	458.925	410.824	9.95077	1.88768	Main stem
17/01/2016 04:58	112.564	2.01166	0	2619.02	LI820	27.79	27.7	0.9961	2499.07	0.03162	410.824	458.925	410.824	9.95077	1.90173	Main stem
17/01/2016 04:59	112.566	2.01133	0	2628.98	LI820	27.79	27.7	0.9961	2510.06	0.03162	410.824	458.925	410.824	9.95077	1.91169	Main stem
17/01/2016 05:00	112.567	2.01094	0	2636.29	LI820	27.77	27.7	0.9961	2518.69	0.03162	410.824	458.925	410.824	9.95077	1.91951	Main stem
17/01/2016 05:01	112.569	2.01053	0	2636.29	LI820	27.76	27.7	0.9961	2519.36	0.03162	410.824	458.925	410.824	9.95077	1.92012	Main stem
17/01/2016 05:02	112.57	2.01014	0	2616.37	LI820	27.75	27.7	0.996	2500.6	0.03162	410.824	458.925	410.824	9.95077	1.90315	Main stem
17/01/2016 05:03	112.572	2.00982	0	2623.89	LI820	27.78	27.7	0.996	2504.2	0.03162	410.824	458.925	410.824	9.95077	1.90641	Main stem
17/01/2016 05:04	112.573	2.00967	0	2651.33	LI820	27.81	27.7	0.996	2526.41	0.03162	410.824	458.925	410.824	9.95077	1.92654	Main stem
17/01/2016 05:05	112.575	2.00958	0	2621.46	LI820	27.8	27.71	0.996	2500.45	0.03162	410.624	458.703	410.624	9.9532	1.90348	Main stem
17/01/2016 05:06	112.576	2.00942	0	2609.06	LI820	27.8	27.73	0.996	2490.99	0.0316	410.224	458.261	410.224	9.95805	1.89463	Main stem
17/01/2016 05:07	112.578	2.00912	0	2609.06	LI820	27.82	27.75	0.996	2490.14	0.03158	409.824	457.818	409.824	9.96291	1.89359	Main stem
17/01/2016 05:08	112.579	2.00895	0	2599.1	LI820	27.84	27.77	0.996	2480.32	0.03157	409.424	457.376	409.424	9.96777	1.88501	Main stem
17/01/2016 05:09	112.581	2.00894	0	2549.3	LI820	27.85	27.79	0.996	2433.84	0.03155	409.025	456.935	409.025	9.97263	1.84262	Main stem
17/01/2016 05:10	112.583	2.0089	0	2559.26	LI820	27.88	27.8	0.996	2441.71	0.03154	408.826	456.714	408.826	9.97506	1.84961	Main stem
17/01/2016 05:36	112.62	2.00976	0	2606.62	LI820	27.83	27.8	0.9952	2492.45	0.03154	408.826	456.714	408.826	9.97506	1.89588	Main stem
17/01/2016 05:37	112.621	2.00971	0	2613.94	LI820	27.83	27.8	0.9952	2499.34	0.03154	408.826	456.714	408.826	9.97506	1.90212	Main stem
17/01/2016 05:38	112.623	2.00979	0	2623.89	LI820	27.83	27.8	0.9952	2508.82	0.03154	408.826	456.714	408.826	9.97506	1.91071	Main stem
17/01/2016 05:39	112.624	2.0098	0	2616.37	LI820	27.84	27.8	0.9952	2501	0.03154	408.826	456.714	408.826	9.97506	1.90362	Main stem
17/01/2016 05:40	112.625	2.00992	0	2691.17	LI820	27.83	27.8	0.9952	2572.92	0.03154	408.826	456.714	408.826	9.97506	1.96879	Main stem
17/01/2016 05:41	112.625	2.00991	0	2678.57	LI820	27.83	27.8	0.9952	2560.79	0.03154	408.826	456.714	408.826	9.97506	1.9578	Main stem
17/01/2016 05:42	112.625	2.00991	0	2663.73	LI820	27.84	27.8	0.9951	2546.37	0.03154	408.826	456.714	408.826	9.97506	1.94477	Main stem
17/01/2016 05:43	112.626	2.00988	0	2651.33	LI820	27.83	27.8	0.9951	2534.53	0.03154	408.826	456.714	408.826	9.97506	1.93404	Main stem
17/01/2016 05:44	112.627	2.00996	0	2638.94	LI820	27.84	27.8	0.9951	2521.62	0.03154	408.826	456.714	408.826	9.97506	1.92234	Main stem
17/01/2016 05:45	112.629	2.01022	0	2609.06	LI820	27.85	27.8	0.9951	2492.25	0.03154	408.826	456.714	408.826	9.97506	1.89573	Main stem
17/01/2016 05:46	112.63	2.01049	0	2601.54	LI820	27.85	27.8	0.9951	2485.35	0.03154	408.826	456.714	408.826	9.97506	1.88948	Main stem
17/01/2016 05:47	112.632	2.01075	0	2596.66	LI820	27.86	27.8	0.9951	2478.83	0.03154	408.826	456.714	408.826	9.97506	1.88357	Main stem
17/01/2016 05:48	112.633	2.01087	0	2596.66	LI820	27.88	27.8	0.995	2476.4	0.03154	408.826	456.714	408.826	9.97506	1.88141	Main stem
17/01/2016 05:49	112.635	2.01095	0	2579.18	LI820	27.89	27.8	0.995	2458.68	0.03154	408.826	456.714	408.826	9.97506	1.86535	Main stem
17/01/2016 05:50	112.636	2.01102	0	2579.18	LI820	27.89	27.8	0.995	2458.77	0.03154	408.826	456.714	408.826	9.97506	1.86543	Main stem
17/01/2016 05:51	112.637	2.01101	0	2579.18	LI820	27.89	27.8	0.995	2459.84	0.03154	408.826	456.714	408.826	9.97506	1.8664	Main stem
17/01/2016 05:52	112.639	2.01107	0	2556.82	LI820	27.91	27.8	0.995	2436.64	0.03154	408.826	456.714	408.826	9.97506	1.84538	Main stem
17/01/2016 05:53	112.64	2.01081	0	2534.46	LI820	27.91	27.8	0.995	2415.08	0.03154	408.826	456.714	408.826	9.97506	1.82585	Main stem
17/01/2016 05:54	112.642	2.01062	0	2541.78	LI820	27.9	27.8	0.9948	2422.35	0.03154	408.826	456.714	408.826	9.97506	1.83251	Main stem
17/01/2016 05:55	112.643	2.01038	0	2541.78	LI820	27.9	27.8	0.9948	2423.34	0.03154	408.826	456.714	408.826	9.97506	1.8334	Main stem
17/01/2016 05:56	112.644	2.00993	0	2541.78	LI820	27.89	27.8	0.9948	2424.54	0.03154	408.826	456.714	408.826	9.97506	1.83449	Main stem
17/01/2016 05:57	112.646	2.00952	0	2502.14	LI820	27.88	27.8	0.9948	2385.63	0.03154	408.826	456.714	408.826	9.97506	1.79924	Main stem
17/01/2016 05:58	112.647	2.00934	0	2509.46	LI820	27.88	27.8	0.9947	2393.2	0.03154	408.826	456.714	408.826	9.97506	1.80613	Main stem
17/01/2016 05:59	112.649	2.00914	0	2522.06	LI820	27.9	27.8	0.9947	2404.52	0.03154	408.826	456.714	408.826	9.97506	1.81639	Main stem
17/01/2016 06:00	112.65	2.00942	0	2512.1	LI820	27.9	27.8	0.9947	2395.1	0.03154	408.826	456.714	408.826	9.97506	1.80785	Main stem
17/01/2016 06:01	112.65	2.00956	0	2499.5	LI820	27.89	27.8	0.9947	2383.3	0.03154	408.826	456.714	408.826	9.97506	1.79716	Main stem
17/01/2016 06:02	112.649	2.00968	0	2522.06	LI820	27.91	27.8	0.9947	2403.18	0.03154	408.826	456.714	408.826	9.97506	1.81517	Main stem
17/01/2016 06:03	112.648	2.00972	0	2556.82	LI820	27.93	27.8	0.9947	2431.95	0.03154	408.826	456.714	408.826	9.97506	1.84124	Main stem
17/01/2016 06:04	112.647	2.00972	0	2574.1	LI820	27.94	27.8	0.9945	2446.17	0.03154	408.826	456.714	408.826	9.97506	1.8542	Main stem
17/01/2016 06:05	112.646	2.00976	0	2613.94	LI820	27.96	27.8	0.9945	2481.12	0.03154	408.826	456.714	408.826	9.97506	1.88587	Main stem
17/01/2016 06:06	112.645	2.00985	0	2596.66	LI820	27.98	27.8	0.9945	2463.9	0.03154	408.826	456.714	408.826	9.97506	1.87026	Main stem
17/01/2016 06:07	112.644	2.0099	0	2564.34	LI820	27.98	27.8	0.9945	2433.53	0.03154	408.826	456.714	408.826	9.97506	1.84275	Main stem
17/01/2016 06:08	112.643	2.01002	0	2576.74	LI820	28	27.8	0.9945	2443.24	0.03154	408.826	456.714	408.826	9.97506	1.85154	Main stem
17/01/2016 06:09	112.642	2.01021	0	2536.9	LI820	28	27.8	0.9945	2405.17	0.03154	408.826	456.714	408.826	9.97506	1.81705	Main stem
17/01/2016 06:10	112.642	2.01034	0	2499.5	LI820	28	27.8	0.9945	2369.46	0.03154	408.826	456.714	408.826	9.97506	1.78469	Main stem
17/01/2016 06:11	112.641	2.01052	0	2484.66	LI820	28.02	27.8	0.9945	2353.78	0.03154	408.826	456.714	408.826	9.97506	1.77049	Main stem
17/01/2016 06:12	112.64	2.01084	0	2447.47	LI820	28.06	27.8	0.9945	2313.03	0.03154	408.826	456.714	408.826	9.97506	1.73356	Main stem
17/01/2016 06:13	112.639	2.01104	0	2467.18	LI820	28.04	27.8	0.9944	2333.88	0.03154	408.826	456.714	408.826	9.97506	1.75249	Main stem
17/01/2016 06:14	112.638	2.01102	0	2477.14	LI820	27.98	27.8	0.9944	2350.04	0.03154	408.826	456.714	408.826	9.97506	1.76713	Main stem
17/01/2016 06:15	112.637	2.01084	0	2489.75	LI820	27.94	27.8	0.9944	2366.36	0.03154	408.826	456.714	408.826	9.97506	1.78192	Main stem
17/01/2016 06:16	112.636	2.01079	0	2504.58	LI820	27.92	27.82	0.9944	2383.99	0.03153	408.427	456.273	408.427	9.97993	1.7982	Main stem
17/01/2016 06:17	112.635	2.0108	0	2487.1	LI820	27.93	27.84	0.9944	2369.22	0.03151	408.029	455.833	408.029	9.9848	1.78455	Main stem
17/01/2016 06:18	112.634	2.01072	0	2479.79	LI820	27.94	27.86	0.9944	2363.18	0.03149	407.632	455.393	407.632	9.98966	1.77882	Main stem
17/01/2016 06:19	112.634	2.01065	0	2489.75	LI820	27.94	27.88	0.9944	2373.92	0.03148	407.234	454.953	407.234	9.99454	1.78885	Main stem
17/01/2016 06:20	112.633	2.01064	0	2479.79	LI820	27.96	27.9	0.9944	2363.84	0.03146	406.837	454.514	406.837	9.99941	1.77946	Main stem
17/01/2016 06:21	112.632	2.01078	0	2489.75	LI820	27.98	27.9	0.9944	2370.8	0.03146	406.837	454.514	406.837	9.99941	1.78576	Main stem
17/01/2016 06:22	112.632	2.0108	0	2482.23	LI820	27.98	27.9	0.9942	2364.55	0.03146	406.837	454.514	406.837	9.99941	1.78017	Main stem
17/01/2016 06:23	112.633	2.01069	0	2492.18	LI820	27.98	27.9	0.9942	2374.41	0.03146	406.837	454.514	406.837	9.99941	1.78911	Main stem
17/01/2016 06:24	112.635	2.01063	0	2544.42	LI820	27.97	27.9	0.9942	2424.33	0.03146	406.837	454.514	406.837	9.99941	1.83433	Main stem
17/01/2016 06:25	112.636	2.01073	0	2561.7	LI820	27.98	27.9	0.9942	2440.64	0.03146	406.837	454.514	406.837	9.99941	1.84911	Main stem
17/01/2016 06:26	112.638	2.01089	0	2516.98	LI820	27.97	27.9	0.9942	2398.48	0.03146	406.837	454.514	406.837	9.99941	1.81091	Main stem
17/01/2016 06:27	112.639	2.01094	0	2516.98	LI820	27.97	27.9	0.9942	2397.96	0.03146	406.837	454.514	406.837	9.99941	1.81044	Main stem
17/01/2016 06:28	112.64	2.01081	0	2489.75	LI820	27.98	27.9	0.9941	2370.53	0.03146	406.837	454.514	406.837	9.99941	1.78563	Main stem
17/01/2016 06:29	112.642	2.01061	0	2489.75	LI820	27.99	27.9	0.9941	2369.21	0.03146	406.837	454.514	406.837	9.99941	1.78443	Main stem
17/01/2016 06:30	112.643	2.01023	0	2467.18	LI820	27.99	27.9	0.9941	2348.37	0.03146	406.837	454.514	406.837	9.99941	1.76555	Main stem
17/01/2016 06:31	112.644	2.01022	0	2442.39	LI820	27.98	27.88	0.9941	2323.73	0.03148	407.234	454.953	407.234	9.99454	1.74348	Main stem
17/01/2016 06:32	112.646	2.01028	0	2472.27	LI820	27.98	27.86	0.9939	2349.55	0.03149	407.632	455.393	407.632	9.98966	1.76665	Main stem
17/01/2016 06:33	112.647	2.01038	0	2410.07	LI820	27.98	27.84	0.9939	2288.57	0.03151	408.029	455.833	408.029	9.9848	1.71166	Main stem
17/01/2016 06:34	112.649	2.01031	0	2410.07	LI820	27.99	27.82	0.9939	2285.2	0.03153	408.427	456.273	408.427	9.97993	1.70886	Main stem
17/01/2016 06:35	112.651	2.01037	0	2405.19	LI820	27.99	27.8	0.9939	2278.69	0.03154	408.826	456.714	408.826	9.97506	1.70267	Main stem
17/01/2016 06:36	112.652	2.01058	0	2405.19	LI820	27.98	27.82	0.9939	2282.51	0.03153	408.427	456.273	408.427	9.97993	1.70642	Main stem
17/01/2016 06:37	112.654	2.01061	0	2405.19	LI820	27.97	27.84	0.9939	2285.06	0.03151	408.029	455.833	408.029	9.9848	1.70848	Main stem
17/01/2016 06:38	112.655	2.01057	0	2429.99	LI820	27.98	27.86	0.9939	2310.44	0.03149	407.632	455.393	407.632	9.98966	1.73122	Main stem
17/01/2016 06:39	112.657	2.01052	0	2380.19	LI820	27.97	27.88	0.9939	2266.01	0.03148	407.234	454.953	407.234	9.99454	1.69125	Main stem
17/01/2016 06:40	112.658	2.01076	0	2352.95	LI820	27.98	27.9	0.9939	2241.01	0.03146	406.837	454.514	406.837	9.99941	1.66835	Main stem
17/01/2016 06:41	112.66	2.01109	0	2352.95	LI820	27.99	27.9	0.9938	2240.07	0.03146	406.837	454.514	406.837	9.99941	1.66754	Main stem
17/01/2016 06:42	112.661	2.0113	0	2357.83	LI820	28	27.9	0.9938	2243.24	0.03146	406.837	454.514	406.837	9.99941	1.67041	Main stem
17/01/2016 06:43	112.663	2.0111	0	2357.83	LI820	28	27.9	0.9938	2242.91	0.03146	406.837	454.514	406.837	9.99941	1.67011	Main stem
17/01/2016 06:44	112.664	2.01128	0	2375.31	LI820	27.99	27.9	0.9938	2260.37	0.03146	406.837	454.514	406.837	9.99941	1.68593	Main stem
17/01/2016 06:45	112.665	2.01134	0	2362.91	LI820	27.99	27.9	0.9938	2247.61	0.03146	406.837	454.514	406.837	9.99941	1.67437	Main stem
17/01/2016 06:46	112.667	2.01112	0	2382.63	LI820	27.98	27.9	0.9938	2267.41	0.03146	406.837	454.514	406.837	9.99941	1.69231	Main stem
17/01/2016 06:47	112.668	2.01082	0	2362.91	LI820	27.97	27.9	0.9938	2249.33	0.03146	406.837	454.514	406.837	9.99941	1.67593	Main stem
17/01/2016 06:48	112.669	2.01027	0	2372.67	LI820	27.96	27.9	0.9937	2258.87	0.03146	406.837	454.514	406.837	9.99941	1.68461	Main stem
17/01/2016 06:49	112.671	2.00992	0	2367.79	LI820	27.95	27.9	0.9937	2255.61	0.03146	406.837	454.514	406.837	9.99941	1.68166	Main stem
17/01/2016 06:50	112.672	2.01001	0	2397.67	LI820	27.96	27.9	0.9937	2283.49	0.03146	406.837	454.514	406.837	9.99941	1.70691	Main stem
17/01/2016 06:51	112.673	2.00987	0	2390.15	LI820	27.97	27.9	0.9937	2275.94	0.03146	406.837	454.514	406.837	9.99941	1.70007	Main stem
17/01/2016 06:52	112.675	2.0095	0	2397.67	LI820	27.97	27.9	0.9937	2282.86	0.03146	406.837	454.514	406.837	9.99941	1.70634	Main stem
17/01/2016 06:53	112.676	2.00916	0	2397.67	LI820	27.96	27.9	0.9937	2283.62	0.03146	406.837	454.514	406.837	9.99941	1.70703	Main stem
17/01/2016 06:54	112.677	2.00872	0	2417.59	LI820	27.95	27.9	0.9937	2303.74	0.03146	406.837	454.514	406.837	9.99941	1.72526	Main stem
17/01/2016 06:55	112.679	2.00843	0	2402.55	LI820	27.96	27.9	0.9937	2289.24	0.03146	406.837	454.514	406.837	9.99941	1.71212	Main stem
17/01/2016 06:56	112.68	2.00822	0	2407.63	LI820	27.96	27.9	0.9935	2292.94	0.03146	406.837	454.514	406.837	9.99941	1.71555	Main stem
17/01/2016 06:57	112.681	2.00819	0	2407.63	LI820	27.97	27.9	0.9935	2292.27	0.03146	406.837	454.514	406.837	9.99941	1.71494	Main stem
17/01/2016 06:58	112.683	2.00844	0	2377.75	LI820	27.98	27.9	0.9935	2262.83	0.03146	406.837	454.514	406.837	9.99941	1.68827	Main stem
17/01/2016 06:59	112.684	2.0085	0	2362.91	LI820	28	27.9	0.9935	2247.07	0.03146	406.837	454.514	406.837	9.99941	1.67399	Main stem
17/01/2016 07:00	112.685	2.00868	0	2352.95	LI820	28	27.9	0.9935	2236.81	0.03146	406.837	454.514	406.837	9.99941	1.6647	Main stem
17/01/2016 07:20	112.715	2.00976	0	2308.03	LI820	27.86	27.74	0.9931	2195.02	0.03159	410.024	458.039	410.024	9.96048	1.62734	Main stem
17/01/2016 07:21	112.716	2.00992	0	2317.99	LI820	27.86	27.73	0.9931	2202.94	0.0316	410.224	458.261	410.224	9.95805	1.63464	Main stem
17/01/2016 07:22	112.718	2.01033	0	2342.99	LI820	27.86	27.72	0.9931	2226.56	0.03161	410.424	458.482	410.424	9.95563	1.65616	Main stem
17/01/2016 07:23	112.719	2.01067	0	2333.03	LI820	27.85	27.72	0.9931	2217.1	0.03161	410.424	458.482	410.424	9.95563	1.64759	Main stem
17/01/2016 07:24	112.72	2.01101	0	2347.87	LI820	27.84	27.71	0.9931	2231.5	0.03162	410.624	458.703	410.624	9.9532	1.66076	Main stem
17/01/2016 07:25	112.722	2.01153	0	2300.72	LI820	27.82	27.7	0.9931	2188.05	0.03162	410.824	458.925	410.824	9.95077	1.62098	Main stem
17/01/2016 07:26	112.723	2.01202	0	2310.68	LI820	27.82	27.7	0.9931	2196.87	0.03162	410.824	458.925	410.824	9.95077	1.62898	Main stem
17/01/2016 07:27	112.725	2.01252	0	2340.35	LI820	27.83	27.7	0.9931	2224.49	0.03162	410.824	458.925	410.824	9.95077	1.65401	Main stem
17/01/2016 07:28	112.726	2.01312	0	2298.07	LI820	27.83	27.7	0.9931	2183.42	0.03162	410.824	458.925	410.824	9.95077	1.61679	Main stem
17/01/2016 07:29	112.728	2.01336	0	2315.55	LI820	27.83	27.7	0.9931	2199.71	0.03162	410.824	458.925	410.824	9.95077	1.63155	Main stem
17/01/2016 07:30	112.729	2.01364	0	2320.64	LI820	27.84	27.7	0.9931	2203.1	0.03162	410.824	458.925	410.824	9.95077	1.63462	Main stem
17/01/2016 07:31	112.731	2.01399	0	2337.91	LI820	27.84	27.7	0.9931	2219.39	0.03162	410.824	458.925	410.824	9.95077	1.64938	Main stem
17/01/2016 07:32	112.732	2.01417	0	2337.91	LI820	27.81	27.7	0.9931	2222.35	0.03162	410.824	458.925	410.824	9.95077	1.65207	Main stem
17/01/2016 07:33	112.734	2.01403	0	2360.27	LI820	27.83	27.7	0.9931	2242.53	0.03162	410.824	458.925	410.824	9.95077	1.67035	Main stem
17/01/2016 07:34	112.735	2.01398	0	2333.03	LI820	27.84	27.7	0.9931	2215.41	0.03162	410.824	458.925	410.824	9.95077	1.64578	Main stem
17/01/2016 07:35	112.737	2.01378	0	2305.6	LI820	27.82	27.7	0.9931	2190.97	0.03162	410.824	458.925	410.824	9.95077	1.62363	Main stem
17/01/2016 07:36	112.738	2.0134	0	2310.68	LI820	27.79	27.7	0.9931	2199.34	0.03162	410.824	458.925	410.824	9.95077	1.63121	Main stem
17/01/2016 07:37	112.74	2.01313	0	2323.08	LI820	27.77	27.7	0.9931	2212.81	0.03162	410.824	458.925	410.824	9.95077	1.64342	Main stem
17/01/2016 07:38	112.741	2.01292	0	2347.87	LI820	27.79	27.7	0.9931	2234.55	0.03162	410.824	458.925	410.824	9.95077	1.66312	Main stem
17/01/2016 07:39	112.743	2.0127	0	2310.68	LI820	27.77	27.7	0.9931	2200.56	0.03162	410.824	458.925	410.824	9.95077	1.63232	Main stem
17/01/2016 07:40	112.744	2.01257	0	2320.64	LI820	27.74	27.7	0.9931	2212.68	0.03162	410.824	458.925	410.824	9.95077	1.6433	Main stem
17/01/2016 07:41	112.746	2.01255	0	2315.55	LI820	27.73	27.7	0.9931	2209.31	0.03162	410.824	458.925	410.824	9.95077	1.64025	Main stem
17/01/2016 07:42	112.747	2.01239	0	2327.95	LI820	27.72	27.7	0.9931	2221.15	0.03162	410.824	458.925	410.824	9.95077	1.65098	Main stem
17/01/2016 07:43	112.749	2.01219	0	2327.95	LI820	27.72	27.7	0.9931	2220	0.03162	410.824	458.925	410.824	9.95077	1.64994	Main stem
17/01/2016 07:44	112.75	2.01218	0	2333.03	LI820	27.73	27.7	0.9931	2223.47	0.03162	410.824	458.925	410.824	9.95077	1.65308	Main stem
17/01/2016 07:45	112.752	2.01223	0	2315.55	LI820	27.75	27.7	0.9931	2205.13	0.03162	410.824	458.925	410.824	9.95077	1.63646	Main stem
17/01/2016 07:46	112.753	2.01231	0	2290.76	LI820	27.73	27.7	0.9931	2185.38	0.03162	410.824	458.925	410.824	9.95077	1.61856	Main stem
17/01/2016 07:47	112.753	2.01231	0	2310.68	LI820	27.72	27.7	0.9931	2206.14	0.03162	410.824	458.925	410.824	9.95077	1.63738	Main stem
17/01/2016 07:48	112.753	2.01232	0	2310.68	LI820	27.73	27.7	0.9931	2205.18	0.03162	410.824	458.925	410.824	9.95077	1.63651	Main stem
17/01/2016 07:49	112.754	2.01238	0	2330.39	LI820	27.72	27.7	0.9931	2224.71	0.03162	410.824	458.925	410.824	9.95077	1.6542	Main stem
17/01/2016 07:50	112.756	2.01262	0	2347.87	LI820	27.71	27.7	0.9931	2241.13	0.03163	410.824	458.925	410.824	9.95077	1.66961	Main stem
17/01/2016 07:51	112.757	2.01304	0	2337.91	LI820	27.72	27.68	0.9931	2228.84	0.03164	411.225	459.369	411.225	9.94592	1.65819	Main stem
17/01/2016 07:52	112.759	2.01337	0	2337.91	LI820	27.73	27.66	0.9931	2226.19	0.03166	411.626	459.812	411.626	9.94108	1.65602	Main stem
17/01/2016 07:53	112.761	2.01356	0	2337.91	LI820	27.72	27.64	0.9931	2224.78	0.03167	412.028	460.257	412.028	9.93623	1.65446	Main stem
17/01/2016 07:54	112.763	2.01377	0	2315.55	LI820	27.71	27.62	0.9931	2203.27	0.03169	412.43	460.702	412.43	9.93139	1.6352	Main stem
17/01/2016 07:55	112.764	2.01388	0	2305.6	LI820	27.7	27.6	0.9931	2192.52	0.03171	412.832	461.147	412.832	9.92654	1.62569	Main stem
17/01/2016 07:56	112.766	2.01405	0	2305.6	LI820	27.68	27.58	0.9931	2193.42	0.03172	413.235	461.593	413.235	9.9217	1.62623	Main stem
17/01/2016 07:57	112.768	2.01419	0	2327.95	LI820	27.66	27.56	0.9931	2214.33	0.03174	413.638	462.039	413.638	9.91687	1.64541	Main stem
17/01/2016 07:58	112.769	2.01434	0	2335.47	LI820	27.65	27.54	0.9931	2220.68	0.03176	414.042	462.485	414.042	9.91203	1.65141	Main stem
17/01/2016 07:59	112.771	2.01456	0	2342.99	LI820	27.65	27.52	0.9931	2226.44	0.03177	414.446	462.932	414.446	9.9072	1.65634	Main stem
17/01/2016 08:00	112.772	2.01472	0	2357.83	LI820	27.63	27.5	0.9931	2240.21	0.03179	414.85	463.38	414.85	9.90237	1.66906	Main stem
17/01/2016 08:01	112.774	2.01471	0	2345.43	LI820	27.62	27.5	0.9931	2229.85	0.03179	414.85	463.38	414.85	9.90237	1.65967	Main stem
17/01/2016 08:02	112.776	2.0147	0	2367.79	LI820	27.59	27.5	0.9931	2253.67	0.03179	414.85	463.38	414.85	9.90237	1.68126	Main stem
17/01/2016 08:03	112.777	2.01463	0	2385.27	LI820	27.58	27.5	0.9931	2272.3	0.03179	414.85	463.38	414.85	9.90237	1.69815	Main stem
17/01/2016 08:04	112.779	2.01457	0	2342.99	LI820	27.56	27.5	0.9931	2233.33	0.03179	414.85	463.38	414.85	9.90237	1.66282	Main stem
17/01/2016 08:05	112.781	2.0144	0	2365.35	LI820	27.56	27.5	0.9931	2254.59	0.03179	414.85	463.38	414.85	9.90237	1.6821	Main stem
17/01/2016 08:06	112.782	2.01419	0	2360.27	LI820	27.56	27.48	0.9931	2248.06	0.03181	415.255	463.827	415.255	9.89754	1.67641	Main stem
17/01/2016 08:07	112.783	2.01391	0	2350.31	LI820	27.53	27.46	0.9931	2239.78	0.03182	415.66	464.276	415.66	9.89272	1.66862	Main stem
17/01/2016 08:08	112.785	2.01393	0	2350.31	LI820	27.47	27.44	0.9931	2244.96	0.03184	416.066	464.724	416.066	9.88789	1.67355	Main stem
17/01/2016 08:09	112.786	2.01389	0	2357.83	LI820	27.43	27.42	0.9931	2253.86	0.03186	416.472	465.174	416.472	9.88307	1.68185	Main stem
17/01/2016 08:10	112.787	2.01393	0	2414.95	LI820	27.42	27.4	0.9931	2307.3	0.03187	416.878	465.623	416.878	9.87826	1.73002	Main stem
17/01/2016 08:11	112.788	2.01395	0	2410.07	LI820	27.41	27.39	0.9932	2303.53	0.03188	417.081	465.848	417.081	9.87585	1.72668	Main stem
17/01/2016 08:12	112.79	2.014	0	2395.23	LI820	27.4	27.39	0.9932	2290.31	0.03188	417.081	465.848	417.081	9.87585	1.71469	Main stem
17/01/2016 08:13	112.791	2.01402	0	2405.19	LI820	27.39	27.38	0.9932	2300.33	0.03189	417.285	466.073	417.285	9.87344	1.7239	Main stem
17/01/2016 08:14	112.793	2.01394	0	2420.03	LI820	27.37	27.37	0.9932	2315.28	0.03189	417.488	466.298	417.488	9.87103	1.73703	Main stem
17/01/2016 08:15	112.794	2.01392	0	2424.91	LI820	27.36	27.37	0.9932	2320.4	0.0319	417.488	466.298	417.488	9.87103	1.74222	Main stem
17/01/2016 08:16	112.795	2.01393	0	2449.91	LI820	27.36	27.36	0.9934	2344.79	0.03191	417.692	466.524	417.692	9.86863	1.76439	Main stem
17/01/2016 08:17	112.796	2.01363	0	2464.75	LI820	27.33	27.35	0.9934	2361.13	0.03191	417.896	466.749	417.896	9.86622	1.77878	Main stem
17/01/2016 08:18	112.798	2.01352	0	2442.39	LI820	27.32	27.35	0.9934	2340.52	0.03192	417.896	466.749	417.896	9.86622	1.76064	Main stem
17/01/2016 08:19	112.799	2.01336	0	2449.91	LI820	27.31	27.34	0.9934	2348.5	0.03192	418.1	466.975	418.1	9.86381	1.76745	Main stem
17/01/2016 08:20	112.8	2.01311	0	2464.75	LI820	27.3	27.33	0.9934	2363.13	0.03193	418.304	467.2	418.304	9.86141	1.78084	Main stem
17/01/2016 08:21	112.802	2.0128	0	2474.7	LI820	27.29	27.33	0.9933	2372.18	0.03193	418.304	467.2	418.304	9.86141	1.78908	Main stem
17/01/2016 08:22	112.803	2.01259	0	2474.7	LI820	27.29	27.32	0.9933	2371.53	0.03194	418.508	467.426	418.508	9.85901	1.78861	Main stem
17/01/2016 08:23	112.804	2.01239	0	2474.7	LI820	27.29	27.31	0.9933	2371.5	0.03194	418.712	467.652	418.712	9.8566	1.78815	Main stem
17/01/2016 08:24	112.806	2.01225	0	2469.83	LI820	27.27	27.31	0.9933	2367.56	0.03195	418.712	467.652	418.712	9.8566	1.78514	Main stem
17/01/2016 08:25	112.807	2.01222	0	2479.79	LI820	27.27	27.3	0.9933	2376.74	0.03195	418.916	467.878	418.916	9.8542	1.79303	Main stem
17/01/2016 08:26	112.809	2.01224	0	2487.1	LI820	27.27	27.3	0.9933	2384.21	0.03195	418.916	467.878	418.916	9.8542	1.7998	Main stem
17/01/2016 08:27	112.81	2.01227	0	2472.27	LI820	27.27	27.3	0.9933	2369.9	0.03195	418.916	467.878	418.916	9.8542	1.78682	Main stem
17/01/2016 08:28	112.812	2.01253	0	2489.75	LI820	27.27	27.3	0.9934	2387.02	0.03195	418.916	467.878	418.916	9.8542	1.80231	Main stem
17/01/2016 08:29	112.813	2.0128	0	2489.75	LI820	27.27	27.3	0.9934	2387.27	0.03195	418.916	467.878	418.916	9.8542	1.80254	Main stem
17/01/2016 08:30	112.815	2.01299	0	2516.98	LI820	27.26	27.3	0.9934	2413.51	0.03196	418.916	467.878	418.916	9.8542	1.8269	Main stem
17/01/2016 08:31	112.816	2.01293	0	2504.58	LI820	27.25	27.28	0.9934	2400.78	0.03197	419.325	468.33	419.325	9.84939	1.81504	Main stem
17/01/2016 08:32	112.818	2.0129	0	2554.38	LI820	27.25	27.26	0.9934	2446.83	0.03199	419.734	468.783	419.734	9.84459	1.85705	Main stem
17/01/2016 08:33	112.819	2.0129	0	2539.34	LI820	27.25	27.24	0.9936	2431.41	0.03201	420.144	469.236	420.144	9.83979	1.84325	Main stem
17/01/2016 08:34	112.821	2.01282	0	2554.38	LI820	27.23	27.22	0.9936	2445.11	0.03202	420.554	469.69	420.554	9.83499	1.85535	Main stem
17/01/2016 08:35	112.822	2.01293	0	2529.38	LI820	27.22	27.2	0.9936	2420.16	0.03204	420.964	470.144	420.964	9.8302	1.83297	Main stem
17/01/2016 08:36	112.824	2.01288	0	2554.38	LI820	27.21	27.2	0.9936	2445.34	0.03204	420.964	470.144	420.964	9.8302	1.85581	Main stem
17/01/2016 08:37	112.825	2.0129	0	2569.22	LI820	27.2	27.2	0.9936	2461.31	0.03204	420.964	470.144	420.964	9.8302	1.8703	Main stem
17/01/2016 08:38	112.827	2.01299	0	2564.34	LI820	27.19	27.2	0.9936	2456.91	0.03204	420.964	470.144	420.964	9.8302	1.86631	Main stem
17/01/2016 08:39	112.828	2.01303	0	2569.22	LI820	27.19	27.2	0.9936	2462.01	0.03204	420.964	470.144	420.964	9.8302	1.87093	Main stem
17/01/2016 08:40	112.83	2.01304	0	2522.06	LI820	27.18	27.2	0.9936	2418.26	0.03204	420.964	470.144	420.964	9.8302	1.83125	Main stem
17/01/2016 08:41	112.831	2.01304	0	2549.3	LI820	27.18	27.2	0.9934	2443.75	0.03204	420.964	470.144	420.964	9.8302	1.85444	Main stem
17/01/2016 08:42	112.832	2.01328	0	2526.94	LI820	27.18	27.2	0.9934	2423.21	0.03204	420.964	470.144	420.964	9.8302	1.83581	Main stem
17/01/2016 08:43	112.834	2.01363	0	2536.9	LI820	27.17	27.2	0.9934	2433.75	0.03204	420.964	470.144	420.964	9.8302	1.84537	Main stem
17/01/2016 08:44	112.834	2.01397	0	2526.94	LI820	27.16	27.2	0.9934	2424.96	0.03204	420.964	470.144	420.964	9.8302	1.8374	Main stem
17/01/2016 08:45	112.834	2.01434	0	2539.34	LI820	27.15	27.2	0.9934	2438.21	0.03204	420.964	470.144	420.964	9.8302	1.84942	Main stem
17/01/2016 08:46	112.834	2.01462	0	2534.46	LI820	27.16	27.2	0.9934	2432.67	0.03204	420.964	470.144	420.964	9.8302	1.84439	Main stem
17/01/2016 08:47	112.833	2.01476	0	2556.82	LI820	27.16	27.2	0.9934	2454.01	0.03204	420.964	470.144	420.964	9.8302	1.86375	Main stem
17/01/2016 08:48	112.833	2.01482	0	2529.38	LI820	27.17	27.2	0.9934	2426.57	0.03204	420.964	470.144	420.964	9.8302	1.83886	Main stem
17/01/2016 08:49	112.833	2.0148	0	2529.38	LI820	27.18	27.2	0.9934	2425.39	0.03204	420.964	470.144	420.964	9.8302	1.83779	Main stem
17/01/2016 08:50	112.832	2.01457	0	2516.98	LI820	27.18	27.2	0.9934	2413.35	0.03204	420.964	470.144	420.964	9.8302	1.82687	Main stem
17/01/2016 08:51	112.832	2.01467	0	2526.94	LI820	27.18	27.2	0.9934	2422.37	0.03204	420.964	470.144	420.964	9.8302	1.83505	Main stem
17/01/2016 08:52	112.831	2.01458	0	2526.94	LI820	27.15	27.2	0.9936	2426.07	0.03204	420.964	470.144	420.964	9.8302	1.83833	Main stem
17/01/2016 08:53	112.831	2.01431	0	2519.42	LI820	27.13	27.2	0.9936	2421.22	0.03204	420.964	470.144	420.964	9.8302	1.83393	Main stem
17/01/2016 08:54	112.832	2.01405	0	2514.54	LI820	27.12	27.2	0.9936	2417.52	0.03204	420.964	470.144	420.964	9.8302	1.83058	Main stem
17/01/2016 08:55	112.833	2.01384	0	2489.75	LI820	27.12	27.2	0.9937	2394.72	0.03204	420.964	470.144	420.964	9.8302	1.80986	Main stem
17/01/2016 08:56	112.834	2.0139	0	2534.46	LI820	27.11	27.2	0.9937	2438.4	0.03204	420.964	470.144	420.964	9.8302	1.84948	Main stem
17/01/2016 08:57	112.836	2.01364	0	2522.06	LI820	27.12	27.2	0.9939	2426.28	0.03204	420.964	470.144	420.964	9.8302	1.83842	Main stem
17/01/2016 08:58	112.837	2.0134	0	2526.94	LI820	27.12	27.2	0.9939	2430.24	0.03204	420.964	470.144	420.964	9.8302	1.84201	Main stem
17/01/2016 08:59	112.838	2.01306	0	2584.06	LI820	27.12	27.2	0.9939	2484.96	0.03204	420.964	470.144	420.964	9.8302	1.89164	Main stem
17/01/2016 09:00	112.84	2.0127	0	2541.78	LI820	27.12	27.2	0.9939	2444.41	0.03204	420.964	470.144	420.964	9.8302	1.85486	Main stem
17/01/2016 09:01	112.841	2.01251	0	2551.74	LI820	27.12	27.2	0.9939	2454.31	0.03204	420.964	470.144	420.964	9.8302	1.86384	Main stem
17/01/2016 09:02	112.843	2.0124	0	2556.82	LI820	27.12	27.2	0.9939	2459.62	0.03204	420.964	470.144	420.964	9.8302	1.86866	Main stem
17/01/2016 09:03	112.844	2.01247	0	2571.66	LI820	27.11	27.2	0.9939	2475.23	0.03204	420.964	470.144	420.964	9.8302	1.88282	Main stem
17/01/2016 09:04	112.846	2.01258	0	2596.66	LI820	27.09	27.2	0.9939	2500.58	0.03204	420.964	470.144	420.964	9.8302	1.90581	Main stem
17/01/2016 09:05	112.847	2.01279	0	2631.42	LI820	27.09	27.2	0.9939	2534.99	0.03204	420.964	470.144	420.964	9.8302	1.93702	Main stem
17/01/2016 09:06	112.849	2.01297	0	2606.62	LI820	27.08	27.2	0.9939	2511.69	0.03204	420.964	470.144	420.964	9.8302	1.91589	Main stem
17/01/2016 09:07	112.85	2.01346	0	2611.5	LI820	27.08	27.2	0.9939	2517.04	0.03204	420.964	470.144	420.964	9.8302	1.92074	Main stem
17/01/2016 09:08	112.852	2.01405	0	2611.5	LI820	27.07	27.19	0.9939	2515.85	0.03205	421.169	470.371	421.169	9.8278	1.91979	Main stem
17/01/2016 09:09	112.853	2.01472	0	2646.25	LI820	27.07	27.17	0.9939	2547.08	0.03207	421.58	470.826	421.58	9.82301	1.94839	Main stem
17/01/2016 09:10	112.855	2.01487	0	2626.33	LI820	27.08	27.15	0.9939	2525.54	0.03208	421.992	471.281	421.992	9.81822	1.92851	Main stem
17/01/2016 09:11	112.857	2.01452	0	2626.33	LI820	27.07	27.13	0.9941	2524.65	0.0321	422.404	471.736	422.404	9.81343	1.92789	Main stem
17/01/2016 09:12	112.859	2.01411	0	2641.38	LI820	27.07	27.11	0.9941	2537.2	0.03212	422.816	472.192	422.816	9.80865	1.93954	Main stem
17/01/2016 09:13	112.861	2.01389	0	2683.65	LI820	27.08	27.1	0.9941	2576.3	0.03212	423.022	472.421	423.022	9.80626	1.97453	Main stem
17/01/2016 09:14	112.862	2.01373	0	2601.54	LI820	27.08	27.1	0.9941	2496.92	0.03212	423.022	472.421	423.022	9.80626	1.90252	Main stem
17/01/2016 09:15	112.864	2.01362	0	2571.66	LI820	27.05	27.1	0.9941	2471.11	0.03212	423.022	472.421	423.022	9.80626	1.87911	Main stem
17/01/2016 09:16	112.865	2.01357	0	2581.62	LI820	27.04	27.1	0.9941	2481.9	0.03212	423.022	472.421	423.022	9.80626	1.8889	Main stem
17/01/2016 09:17	112.866	2.01366	0	2586.7	LI820	27.04	27.1	0.9941	2487.19	0.03212	423.022	472.421	423.022	9.80626	1.8937	Main stem
17/01/2016 09:18	112.868	2.0139	0	2564.34	LI820	27.03	27.1	0.9939	2466.71	0.03212	423.022	472.421	423.022	9.80626	1.87519	Main stem
17/01/2016 09:19	112.869	2.01427	0	2549.3	LI820	27.02	27.1	0.9939	2453.46	0.03212	423.022	472.421	423.022	9.80626	1.86317	Main stem
17/01/2016 09:20	112.871	2.01466	0	2564.34	LI820	27.01	27.1	0.9938	2468.13	0.03212	423.022	472.421	423.022	9.80626	1.87652	Main stem
17/01/2016 09:21	112.872	2.01508	0	2549.3	LI820	27.01	27.1	0.9938	2453.74	0.03212	423.022	472.421	423.022	9.80626	1.86346	Main stem
17/01/2016 09:22	112.874	2.01548	0	2512.1	LI820	27.02	27.1	0.9938	2417.06	0.03212	423.022	472.421	423.022	9.80626	1.83019	Main stem
17/01/2016 09:23	112.876	2.01596	0	2541.78	LI820	27.03	27.1	0.9938	2444.57	0.03212	423.022	472.421	423.022	9.80626	1.85514	Main stem
17/01/2016 09:24	112.877	2.01635	0	2554.38	LI820	27.03	27.1	0.9938	2456.17	0.03212	423.022	472.421	423.022	9.80626	1.86567	Main stem
17/01/2016 09:25	112.879	2.01666	0	2566.78	LI820	27.03	27.1	0.9938	2468	0.03212	423.022	472.421	423.022	9.80626	1.8764	Main stem
17/01/2016 09:26	112.88	2.01686	0	2576.74	LI820	27.04	27.1	0.9938	2477.31	0.03212	423.022	472.421	423.022	9.80626	1.88484	Main stem
17/01/2016 09:27	112.882	2.01701	0	2594.02	LI820	27.03	27.1	0.9938	2494.35	0.03212	423.022	472.421	423.022	9.80626	1.9003	Main stem
17/01/2016 09:28	112.884	2.01721	0	2594.02	LI820	27.03	27.1	0.9938	2494.27	0.03212	423.022	472.421	423.022	9.80626	1.90023	Main stem
17/01/2016 09:29	112.885	2.01743	0	2611.5	LI820	27.03	27.1	0.9938	2510.91	0.03212	423.022	472.421	423.022	9.80626	1.91532	Main stem
17/01/2016 09:30	112.887	2.0177	0	2621.46	LI820	27.03	27.1	0.9938	2521.07	0.03212	423.022	472.421	423.022	9.80626	1.92454	Main stem
17/01/2016 09:31	112.889	2.0178	0	2616.37	LI820	27.02	27.1	0.9938	2517.54	0.03212	423.022	472.421	423.022	9.80626	1.92134	Main stem
17/01/2016 09:32	112.89	2.01766	0	2663.73	LI820	27	27.1	0.9939	2564.82	0.03212	423.022	472.421	423.022	9.80626	1.96419	Main stem
17/01/2016 09:33	112.892	2.01772	0	2656.21	LI820	27	27.1	0.9939	2557.89	0.03212	423.022	472.421	423.022	9.80626	1.9579	Main stem
17/01/2016 09:34	112.894	2.01771	0	2693.61	LI820	27	27.1	0.9939	2594.12	0.03212	423.022	472.421	423.022	9.80626	1.99077	Main stem
17/01/2016 09:35	112.895	2.01773	0	2671.25	LI820	27	27.1	0.9939	2572.95	0.03212	423.022	472.421	423.022	9.80626	1.97157	Main stem
17/01/2016 09:36	112.897	2.01794	0	2671.25	LI820	27	27.1	0.9939	2573.13	0.03212	423.022	472.421	423.022	9.80626	1.97173	Main stem
17/01/2016 09:37	112.899	2.01833	0	2623.89	LI820	27	27.1	0.9939	2527.11	0.03212	423.022	472.421	423.022	9.80626	1.92998	Main stem
17/01/2016 09:38	112.9	2.01852	0	2601.54	LI820	27	27.09	0.9939	2503.41	0.03213	423.229	472.649	423.229	9.80386	1.90861	Main stem
17/01/2016 09:39	112.901	2.01882	0	2586.7	LI820	27.01	27.07	0.9939	2486.84	0.03215	423.642	473.106	423.642	9.79908	1.89384	Main stem
17/01/2016 09:40	112.903	2.01898	0	2554.38	LI820	27	27.05	0.9939	2454.25	0.03217	424.055	473.563	424.055	9.79431	1.86452	Main stem
17/01/2016 09:41	112.904	2.01925	0	2586.7	LI820	26.98	27.03	0.9939	2485.71	0.03218	424.469	474.021	424.469	9.78953	1.89273	Main stem
17/01/2016 09:42	112.906	2.01934	0	2581.62	LI820	26.96	27.01	0.9939	2480.35	0.0322	424.883	474.479	424.883	9.78476	1.88812	Main stem
17/01/2016 09:43	112.908	2.01927	0	2611.5	LI820	26.95	27	0.9939	2509.63	0.03221	425.091	474.709	425.091	9.78237	1.91481	Main stem
17/01/2016 09:44	112.909	2.01917	0	2636.29	LI820	26.96	27	0.9941	2533.51	0.03221	425.091	474.709	425.091	9.78237	1.93641	Main stem
17/01/2016 09:45	112.911	2.01932	0	2621.46	LI820	26.96	27	0.9941	2518.73	0.03221	425.091	474.709	425.091	9.78237	1.923	Main stem
17/01/2016 09:46	112.913	2.01919	0	2673.69	LI820	26.95	27	0.9941	2570.04	0.03221	425.091	474.709	425.091	9.78237	1.96956	Main stem
17/01/2016 09:47	112.914	2.01906	0	2656.21	LI820	26.94	27	0.9941	2554.54	0.03221	425.091	474.709	425.091	9.78237	1.9555	Main stem
17/01/2016 09:48	112.916	2.01902	0	2673.69	LI820	26.94	27	0.9941	2570.99	0.03221	425.091	474.709	425.091	9.78237	1.97042	Main stem
17/01/2016 09:49	112.917	2.01907	0	2666.17	LI820	26.94	27	0.9941	2563.77	0.03221	425.091	474.709	425.091	9.78237	1.96387	Main stem
17/01/2016 09:50	112.919	2.01924	0	2698.49	LI820	26.94	27	0.9941	2594.73	0.03221	425.091	474.709	425.091	9.78237	1.99197	Main stem
17/01/2016 09:51	112.92	2.01897	0	2710.89	LI820	26.94	27	0.9941	2606.91	0.03221	425.091	474.709	425.091	9.78237	2.00302	Main stem
17/01/2016 09:52	112.922	2.01877	0	2770.65	LI820	26.94	27	0.9941	2664.96	0.03221	425.091	474.709	425.091	9.78237	2.0557	Main stem
17/01/2016 09:53	112.923	2.01883	0	2780.61	LI820	26.94	27	0.9941	2674.46	0.03221	425.091	474.709	425.091	9.78237	2.06432	Main stem
17/01/2016 09:54	112.923	2.01885	0	2720.85	LI820	26.93	27	0.9941	2617.69	0.03221	425.091	474.709	425.091	9.78237	2.0128	Main stem
17/01/2016 09:55	112.923	2.01887	0	2740.77	LI820	26.9	27	0.9942	2640.48	0.03221	425.091	474.709	425.091	9.78237	2.03345	Main stem
17/01/2016 09:56	112.924	2.019	0	2768.21	LI820	26.9	27	0.9942	2667.77	0.03221	425.091	474.709	425.091	9.78237	2.05821	Main stem
17/01/2016 09:57	112.925	2.01912	0	2768.21	LI820	26.89	27	0.9942	2667.84	0.03221	425.091	474.709	425.091	9.78237	2.05827	Main stem
17/01/2016 09:58	112.927	2.01922	0	2750.73	LI820	26.89	27	0.9942	2650.99	0.03221	425.091	474.709	425.091	9.78237	2.04298	Main stem
17/01/2016 09:59	112.928	2.01925	0	2770.65	LI820	26.9	27	0.9942	2669.86	0.03221	425.091	474.709	425.091	9.78237	2.06011	Main stem
17/01/2016 10:00	112.93	2.01907	0	2780.61	LI820	26.89	27	0.9942	2679.96	0.03221	425.091	474.709	425.091	9.78237	2.06927	Main stem
17/01/2016 22:59	112.901	2.01827	0	2268.4	LI820	26.87	26.9	0.9963	2184.28	0.03229	427.169	477.008	427.169	9.75854	1.61876	Main stem
17/01/2016 23:00	112.897	2.01778	0	2268.4	LI820	26.86	26.9	0.9965	2184.89	0.03229	427.169	477.008	427.169	9.75854	1.61925	Main stem
17/01/2016 23:01	112.895	2.01738	0	2268.4	LI820	26.86	26.9	0.9965	2184.92	0.03229	427.169	477.008	427.169	9.75854	1.61927	Main stem
17/01/2016 23:02	112.892	2.01723	0	2285.68	LI820	26.86	26.9	0.9965	2201.91	0.03229	427.169	477.008	427.169	9.75854	1.63469	Main stem
17/01/2016 23:03	112.889	2.01713	0	2238.52	LI820	26.86	26.9	0.9965	2156.5	0.03229	427.169	477.008	427.169	9.75854	1.59348	Main stem
17/01/2016 23:04	112.886	2.01702	0	2270.84	LI820	26.86	26.9	0.9965	2187.48	0.03229	427.169	477.008	427.169	9.75854	1.6216	Main stem
17/01/2016 23:05	112.883	2.01691	0	2283.24	LI820	26.86	26.9	0.9965	2199.54	0.03229	427.169	477.008	427.169	9.75854	1.63254	Main stem
17/01/2016 23:06	112.88	2.0168	0	2283.24	LI820	26.85	26.9	0.9965	2200.24	0.03229	427.169	477.008	427.169	9.75854	1.63318	Main stem
17/01/2016 23:07	112.878	2.01669	0	2288.12	LI820	26.85	26.9	0.9965	2205.16	0.03229	427.169	477.008	427.169	9.75854	1.63764	Main stem
17/01/2016 23:08	112.875	2.01658	0	2295.64	LI820	26.85	26.9	0.9966	2213.01	0.03229	427.169	477.008	427.169	9.75854	1.64473	Main stem
17/01/2016 23:09	112.872	2.01648	0	2315.55	LI820	26.85	26.9	0.9966	2231.75	0.03229	427.169	477.008	427.169	9.75854	1.66173	Main stem
17/01/2016 23:10	112.869	2.01637	0	2275.72	LI820	26.86	26.9	0.9966	2193.05	0.03229	427.169	477.008	427.169	9.75854	1.62661	Main stem
17/01/2016 23:11	112.866	2.01626	0	2275.72	LI820	26.85	26.9	0.9966	2193.59	0.03229	427.169	477.008	427.169	9.75854	1.6271	Main stem
17/01/2016 23:12	112.864	2.01615	0	2283.24	LI820	26.84	26.9	0.9966	2201.53	0.03229	427.169	477.008	427.169	9.75854	1.63431	Main stem
17/01/2016 23:13	112.861	2.01604	0	2293.2	LI820	26.84	26.9	0.9966	2211.68	0.03229	427.169	477.008	427.169	9.75854	1.64352	Main stem
17/01/2016 23:14	112.858	2.01593	0	2293.2	LI820	26.84	26.9	0.9966	2211.83	0.03229	427.169	477.008	427.169	9.75854	1.64366	Main stem
17/01/2016 23:15	112.855	2.01583	0	2325.51	LI820	26.83	26.9	0.9966	2243.35	0.03229	427.169	477.008	427.169	9.75854	1.67226	Main stem
17/01/2016 23:16	112.852	2.01572	0	2330.39	LI820	26.84	26.9	0.9966	2246.94	0.03229	427.169	477.008	427.169	9.75854	1.67552	Main stem
17/01/2016 23:17	112.849	2.01561	0	2330.39	LI820	26.84	26.9	0.9966	2247.13	0.03229	427.169	477.008	427.169	9.75854	1.67569	Main stem
17/01/2016 23:18	112.847	2.0155	0	2360.27	LI820	26.84	26.9	0.9966	2276.7	0.03229	427.169	477.008	427.169	9.75854	1.70253	Main stem
17/01/2016 23:19	112.844	2.01539	0	2335.47	LI820	26.84	26.9	0.9968	2252.39	0.03229	427.169	477.008	427.169	9.75854	1.68039	Main stem
17/01/2016 23:20	112.841	2.01528	0	2382.63	LI820	26.84	26.9	0.9968	2298.45	0.03229	427.169	477.008	427.169	9.75854	1.72219	Main stem
17/01/2016 23:21	112.838	2.01518	0	2370.23	LI820	26.83	26.9	0.9968	2287.09	0.03229	427.169	477.008	427.169	9.75854	1.71188	Main stem
17/01/2016 23:22	112.835	2.01507	0	2382.63	LI820	26.83	26.9	0.9968	2299.25	0.03229	427.169	477.008	427.169	9.75854	1.72292	Main stem
17/01/2016 23:23	112.833	2.01496	0	2377.75	LI820	26.83	26.9	0.9968	2294.47	0.03229	427.169	477.008	427.169	9.75854	1.71858	Main stem
17/01/2016 23:24	112.83	2.01485	0	2420.03	LI820	26.83	26.9	0.9968	2335.53	0.03229	427.169	477.008	427.169	9.75854	1.75584	Main stem
17/01/2016 23:25	112.827	2.01474	0	2390.15	LI820	26.83	26.9	0.9968	2306.67	0.03229	427.169	477.008	427.169	9.75854	1.72965	Main stem
17/01/2016 23:26	112.824	2.01463	0	2422.47	LI820	26.82	26.9	0.9968	2338.24	0.03229	427.169	477.008	427.169	9.75854	1.7583	Main stem
17/01/2016 23:27	112.821	2.01453	0	2429.99	LI820	26.82	26.9	0.9968	2346.08	0.03229	427.169	477.008	427.169	9.75854	1.76542	Main stem
17/01/2016 23:28	112.819	2.01442	0	2390.15	LI820	26.82	26.9	0.9968	2307.19	0.03229	427.169	477.008	427.169	9.75854	1.73012	Main stem
17/01/2016 23:29	112.816	2.01431	0	2427.55	LI820	26.82	26.9	0.9968	2343.71	0.03229	427.169	477.008	427.169	9.75854	1.76326	Main stem
17/01/2016 23:30	112.813	2.0142	0	2447.47	LI820	26.82	26.9	0.9968	2363.32	0.03229	427.169	477.008	427.169	9.75854	1.78106	Main stem
17/01/2016 23:31	112.81	2.01409	0	2439.95	LI820	26.81	26.9	0.9968	2356.49	0.03229	427.169	477.008	427.169	9.75854	1.77486	Main stem
17/01/2016 23:32	112.807	2.01398	0	2472.27	LI820	26.8	26.9	0.9968	2388.52	0.03229	427.169	477.008	427.169	9.75854	1.80393	Main stem
17/01/2016 23:33	112.805	2.01388	0	2454.79	LI820	26.8	26.9	0.9968	2371.98	0.03229	427.169	477.008	427.169	9.75854	1.78892	Main stem
17/01/2016 23:34	112.802	2.01377	0	2472.27	LI820	26.8	26.9	0.9969	2388.76	0.03229	427.169	477.008	427.169	9.75854	1.80411	Main stem
17/01/2016 23:35	112.799	2.01366	0	2467.18	LI820	26.8	26.9	0.9969	2383.9	0.03229	427.169	477.008	427.169	9.75854	1.7997	Main stem
17/01/2016 23:36	112.796	2.01355	0	2447.47	LI820	26.81	26.9	0.9969	2364.17	0.03229	427.169	477.008	427.169	9.75854	1.7818	Main stem
17/01/2016 23:37	112.793	2.01344	0	2482.23	LI820	26.81	26.9	0.9969	2398.24	0.03229	427.169	477.008	427.169	9.75854	1.81271	Main stem
17/01/2016 23:38	112.791	2.01333	0	2482.23	LI820	26.8	26.9	0.9969	2398.58	0.03229	427.169	477.008	427.169	9.75854	1.81302	Main stem
17/01/2016 23:39	112.788	2.01323	0	2482.23	LI820	26.8	26.9	0.9969	2398.39	0.03229	427.169	477.008	427.169	9.75854	1.81285	Main stem
17/01/2016 23:40	112.785	2.01312	0	2507.02	LI820	26.8	26.9	0.9969	2422.56	0.03229	427.169	477.008	427.169	9.75854	1.83478	Main stem
17/01/2016 23:41	112.782	2.01301	0	2454.79	LI820	26.8	26.9	0.9969	2372.18	0.03229	427.169	477.008	427.169	9.75854	1.78906	Main stem
17/01/2016 23:42	112.779	2.0129	0	2492.18	LI820	26.8	26.9	0.9969	2408.11	0.03229	427.169	477.008	427.169	9.75854	1.82167	Main stem
17/01/2016 23:43	112.776	2.01279	0	2499.5	LI820	26.8	26.9	0.9971	2416.09	0.03229	427.169	477.008	427.169	9.75854	1.82884	Main stem
17/01/2016 23:44	112.774	2.01268	0	2489.75	LI820	26.8	26.9	0.9971	2406.02	0.03229	427.169	477.008	427.169	9.75854	1.8197	Main stem
17/01/2016 23:45	112.771	2.01258	0	2516.98	LI820	26.8	26.9	0.9971	2432.87	0.03229	427.169	477.008	427.169	9.75854	1.84407	Main stem
17/01/2016 23:46	112.768	2.01247	0	2532.02	LI820	26.79	26.9	0.9971	2448.15	0.03229	427.169	477.008	427.169	9.75854	1.85793	Main stem
17/01/2016 23:47	112.765	2.01236	0	2502.14	LI820	26.81	26.9	0.9971	2417.6	0.03229	427.169	477.008	427.169	9.75854	1.83021	Main stem
17/01/2016 23:48	112.762	2.01225	0	2487.1	LI820	26.8	26.9	0.9971	2404.15	0.03229	427.169	477.008	427.169	9.75854	1.818	Main stem
17/01/2016 23:49	112.76	2.01214	0	2487.1	LI820	26.8	26.9	0.9972	2404.69	0.03229	427.169	477.008	427.169	9.75854	1.81846	Main stem
17/01/2016 23:50	112.757	2.01203	0	2516.98	LI820	26.8	26.9	0.9972	2433.06	0.03229	427.169	477.008	427.169	9.75854	1.8442	Main stem
17/01/2016 23:51	112.754	2.01193	0	2529.38	LI820	26.8	26.9	0.9972	2444.82	0.03229	427.169	477.008	427.169	9.75854	1.85488	Main stem
17/01/2016 23:52	112.751	2.01182	0	2499.5	LI820	26.8	26.88	0.9972	2414.16	0.03231	427.586	477.469	427.586	9.75378	1.82729	Main stem
17/01/2016 23:53	112.748	2.01171	0	2514.54	LI820	26.79	26.86	0.9972	2426.82	0.03233	428.003	477.931	428.003	9.74903	1.83902	Main stem
17/01/2016 23:54	112.746	2.0116	0	2489.75	LI820	26.78	26.84	0.9973	2402.42	0.03235	428.421	478.393	428.421	9.74427	1.81708	Main stem
17/01/2016 23:55	112.743	2.01149	0	2507.02	LI820	26.79	26.82	0.9973	2416.47	0.03236	428.839	478.856	428.839	9.73952	1.8295	Main stem
17/01/2016 23:56	112.74	2.01138	0	2502.14	LI820	26.79	26.8	0.9973	2410.53	0.03238	429.258	479.319	429.258	9.73477	1.82435	Main stem
17/01/2016 23:57	112.737	2.01128	0	2492.18	LI820	26.8	26.8	0.9973	2400.19	0.03238	429.258	479.319	429.258	9.73477	1.81496	Main stem
17/01/2016 23:58	112.734	2.01117	0	2524.5	LI820	26.79	26.8	0.9973	2432.03	0.03238	429.258	479.319	429.258	9.73477	1.84387	Main stem
17/01/2016 23:59	112.732	2.01106	0	2482.23	LI820	26.79	26.8	0.9975	2391.22	0.03238	429.258	479.319	429.258	9.73477	1.80675	Main stem
18/01/2016 00:00	112.729	2.01095	0	2514.54	LI820	26.79	26.8	0.9975	2421.92	0.03238	429.258	479.319	429.258	9.73477	1.83462	Main stem
18/01/2016 00:01	112.726	2.01084	0	2526.94	LI820	26.78	26.8	0.9975	2434.72	0.03238	429.258	479.319	429.258	9.73477	1.84624	Main stem
18/01/2016 00:02	112.723	2.01073	0	2504.58	LI820	26.79	26.8	0.9975	2412.88	0.03238	429.258	479.319	429.258	9.73477	1.82641	Main stem
18/01/2016 00:03	112.72	2.01063	0	2522.06	LI820	26.79	26.8	0.9975	2429.83	0.03238	429.258	479.319	429.258	9.73477	1.8418	Main stem
18/01/2016 00:04	112.718	2.01052	0	2536.9	LI820	26.79	26.8	0.9975	2443.84	0.03238	429.258	479.319	429.258	9.73477	1.85452	Main stem
18/01/2016 00:05	112.715	2.01041	0	2556.82	LI820	26.79	26.8	0.9975	2463.41	0.03238	429.258	479.319	429.258	9.73477	1.87228	Main stem
18/01/2016 00:06	112.712	2.0103	0	2556.82	LI820	26.79	26.8	0.9975	2462.98	0.03238	429.258	479.319	429.258	9.73477	1.87189	Main stem
18/01/2016 00:07	112.709	2.01019	0	2519.42	LI820	26.79	26.8	0.9976	2427.5	0.03238	429.258	479.319	429.258	9.73477	1.83965	Main stem
18/01/2016 00:08	112.706	2.01008	0	2526.94	LI820	26.79	26.8	0.9976	2434.56	0.03238	429.258	479.319	429.258	9.73477	1.84605	Main stem
18/01/2016 00:09	112.703	2.00998	0	2536.9	LI820	26.79	26.8	0.9976	2443.99	0.03238	429.258	479.319	429.258	9.73477	1.85461	Main stem
18/01/2016 00:10	112.701	2.00987	0	2519.42	LI820	26.78	26.8	0.9976	2428.05	0.03238	429.258	479.319	429.258	9.73477	1.84014	Main stem
18/01/2016 00:11	112.698	2.00976	0	2549.3	LI820	26.79	26.8	0.9976	2456.42	0.03238	429.258	479.319	429.258	9.73477	1.8659	Main stem
18/01/2016 00:12	112.695	2.00965	0	2524.5	LI820	26.79	26.8	0.9976	2432.7	0.03238	429.258	479.319	429.258	9.73477	1.84437	Main stem
18/01/2016 00:13	112.692	2.00954	0	2539.34	LI820	26.79	26.8	0.9976	2446.61	0.03238	429.258	479.319	429.258	9.73477	1.85699	Main stem
18/01/2016 00:14	112.689	2.00943	0	2546.86	LI820	26.79	26.8	0.9976	2453.29	0.03238	429.258	479.319	429.258	9.73477	1.86306	Main stem
18/01/2016 00:15	112.687	2.00921	0	2561.7	LI820	26.79	26.8	0.9978	2468.14	0.03238	429.258	479.319	429.258	9.73477	1.87647	Main stem
18/01/2016 00:16	112.684	2.00883	0	2569.22	LI820	26.78	26.8	0.9978	2476.66	0.03237	429.258	479.319	429.258	9.73477	1.88362	Main stem
18/01/2016 00:17	112.681	2.00873	0	2569.22	LI820	26.79	26.82	0.9978	2478.03	0.03235	428.839	478.856	428.839	9.73952	1.88462	Main stem
18/01/2016 00:18	112.678	2.00897	0	2554.38	LI820	26.8	26.84	0.9978	2465.16	0.03234	428.421	478.393	428.421	9.74427	1.87327	Main stem
18/01/2016 00:19	112.675	2.0093	0	2554.38	LI820	26.8	26.86	0.9978	2466.91	0.03232	428.003	477.931	428.003	9.74903	1.87462	Main stem
18/01/2016 00:20	112.672	2.01	0	2576.74	LI820	26.79	26.88	0.9978	2491.48	0.0323	427.586	477.469	427.586	9.75378	1.89666	Main stem
18/01/2016 00:21	112.669	2.01041	0	2581.62	LI820	26.79	26.9	0.9978	2497.55	0.03229	427.169	477.008	427.169	9.75854	1.90251	Main stem
18/01/2016 00:22	112.666	2.01037	0	2576.74	LI820	26.8	26.9	0.9978	2492.63	0.03229	427.169	477.008	427.169	9.75854	1.89804	Main stem
18/01/2016 00:23	112.664	2.01033	0	2576.74	LI820	26.79	26.9	0.9979	2493.09	0.03229	427.169	477.008	427.169	9.75854	1.89843	Main stem
18/01/2016 00:24	112.661	2.01029	0	2576.74	LI820	26.8	26.9	0.9979	2492.79	0.03229	427.169	477.008	427.169	9.75854	1.89815	Main stem
18/01/2016 00:25	112.658	2.01024	0	2576.74	LI820	26.8	26.9	0.9979	2492.4	0.03229	427.169	477.008	427.169	9.75854	1.8978	Main stem
18/01/2016 00:26	112.655	2.0102	0	2544.42	LI820	26.8	26.9	0.9979	2461.07	0.03229	427.169	477.008	427.169	9.75854	1.86937	Main stem
18/01/2016 00:27	112.652	2.01016	0	2584.06	LI820	26.81	26.9	0.9979	2498.25	0.03229	427.169	477.008	427.169	9.75854	1.90311	Main stem
18/01/2016 00:28	112.649	2.01012	0	2591.58	LI820	26.81	26.9	0.9979	2506.17	0.03229	427.169	477.008	427.169	9.75854	1.9103	Main stem
18/01/2016 00:29	112.647	2.01007	0	2554.38	LI820	26.8	26.9	0.9979	2470.89	0.03229	427.169	477.008	427.169	9.75854	1.87828	Main stem
18/01/2016 00:30	112.644	2.01003	0	2581.62	LI820	26.8	26.9	0.9979	2497.28	0.03229	427.169	477.008	427.169	9.75854	1.90223	Main stem
18/01/2016 00:31	112.641	2.00999	0	2613.94	LI820	26.81	26.9	0.9981	2528.48	0.03229	427.169	477.008	427.169	9.75854	1.93047	Main stem
18/01/2016 00:32	112.638	2.00995	0	2581.62	LI820	26.8	26.9	0.9981	2497.75	0.03229	427.169	477.008	427.169	9.75854	1.90258	Main stem
18/01/2016 00:33	112.635	2.00991	0	2559.26	LI820	26.8	26.9	0.9981	2475.51	0.03229	427.169	477.008	427.169	9.75854	1.8824	Main stem
18/01/2016 00:34	112.632	2.00986	0	2601.54	LI820	26.81	26.9	0.9981	2516.27	0.03229	427.169	477.008	427.169	9.75854	1.91939	Main stem
18/01/2016 00:35	112.63	2.00982	0	2566.78	LI820	26.8	26.9	0.9981	2483.07	0.03229	427.169	477.008	427.169	9.75854	1.88926	Main stem
18/01/2016 00:36	112.627	2.00978	0	2603.98	LI820	26.8	26.9	0.9981	2519.1	0.03229	427.169	477.008	427.169	9.75854	1.92196	Main stem
18/01/2016 00:37	112.624	2.00974	0	2569.22	LI820	26.81	26.9	0.9981	2485	0.03229	427.169	477.008	427.169	9.75854	1.89101	Main stem
18/01/2016 00:38	112.621	2.0097	0	2616.37	LI820	26.81	26.9	0.9981	2530.03	0.03229	427.169	477.008	427.169	9.75854	1.93187	Main stem
18/01/2016 00:56	112.57	2.01039	0	2613.94	LI820	26.83	26.9	0.9984	2526.3	0.03229	427.169	477.008	427.169	9.75854	1.92838	Main stem
18/01/2016 00:57	112.567	2.01088	0	2628.98	LI820	26.83	26.9	0.9984	2540.67	0.03229	427.169	477.008	427.169	9.75854	1.94142	Main stem
18/01/2016 00:58	112.564	2.01127	0	2636.29	LI820	26.84	26.9	0.9984	2547.41	0.03229	427.169	477.008	427.169	9.75854	1.94754	Main stem
18/01/2016 00:59	112.561	2.01159	0	2663.73	LI820	26.84	26.9	0.9984	2573.72	0.03229	427.169	477.008	427.169	9.75854	1.97141	Main stem
18/01/2016 01:00	112.558	2.01192	0	2671.25	LI820	26.84	26.9	0.9984	2580.68	0.03229	427.169	477.008	427.169	9.75854	1.97773	Main stem
18/01/2016 01:01	112.555	2.01224	0	2681.21	LI820	26.86	26.9	0.9984	2588	0.03229	427.169	477.008	427.169	9.75854	1.98437	Main stem
18/01/2016 01:02	112.552	2.01256	0	2681.21	LI820	26.85	26.9	0.9984	2589.43	0.03229	427.169	477.008	427.169	9.75854	1.98567	Main stem
18/01/2016 01:03	112.55	2.01288	0	2651.33	LI820	26.85	26.9	0.9984	2560.04	0.03229	427.169	477.008	427.169	9.75854	1.959	Main stem
18/01/2016 01:04	112.547	2.01321	0	2661.29	LI820	26.85	26.9	0.9984	2569.93	0.03229	427.169	477.008	427.169	9.75854	1.96797	Main stem
18/01/2016 01:05	112.544	2.01353	0	2646.25	LI820	26.85	26.9	0.9984	2555.39	0.03229	427.169	477.008	427.169	9.75854	1.95478	Main stem
18/01/2016 01:06	112.541	2.01419	0	2651.33	LI820	26.86	26.9	0.9984	2559.73	0.03229	427.169	477.008	427.169	9.75854	1.95872	Main stem
18/01/2016 01:07	112.538	2.01473	0	2646.25	LI820	26.86	26.9	0.9984	2554.53	0.03229	427.169	477.008	427.169	9.75854	1.954	Main stem
18/01/2016 01:08	112.535	2.01533	0	2668.61	LI820	26.86	26.9	0.9984	2575.69	0.03229	427.169	477.008	427.169	9.75854	1.9732	Main stem
18/01/2016 01:09	112.533	2.01593	0	2668.61	LI820	26.86	26.9	0.9984	2575.95	0.03229	427.169	477.008	427.169	9.75854	1.97344	Main stem
18/01/2016 01:10	112.53	2.01653	0	2663.73	LI820	26.86	26.9	0.9984	2570.75	0.03229	427.169	477.008	427.169	9.75854	1.96872	Main stem
18/01/2016 01:11	112.527	2.01713	0	2671.25	LI820	26.86	26.9	0.9984	2578.04	0.03229	427.169	477.008	427.169	9.75854	1.97533	Main stem
18/01/2016 01:12	112.524	2.01773	0	2653.77	LI820	26.87	26.9	0.9984	2560.77	0.03229	427.169	477.008	427.169	9.75854	1.95966	Main stem
18/01/2016 01:13	112.521	2.01833	0	2631.42	LI820	26.87	26.9	0.9984	2538.63	0.03229	427.169	477.008	427.169	9.75854	1.93957	Main stem
18/01/2016 01:14	112.519	2.01893	0	2571.66	LI820	26.87	26.9	0.9984	2481.04	0.03229	427.169	477.008	427.169	9.75854	1.88731	Main stem
18/01/2016 01:15	112.516	2.01952	0	2611.5	LI820	26.87	26.9	0.9984	2519.11	0.03229	427.169	477.008	427.169	9.75854	1.92186	Main stem
18/01/2016 01:16	112.513	2.02012	0	2661.29	LI820	26.88	26.9	0.9984	2566.36	0.03229	427.169	477.008	427.169	9.75854	1.96473	Main stem
18/01/2016 01:17	112.51	2.02072	0	2681.21	LI820	26.9	26.9	0.9984	2583.92	0.03229	427.169	477.008	427.169	9.75854	1.98067	Main stem
18/01/2016 01:18	112.507	2.02132	0	2713.53	LI820	26.9	26.9	0.9984	2614.28	0.03229	427.169	477.008	427.169	9.75854	2.00822	Main stem
18/01/2016 01:19	112.505	2.02192	0	2728.37	LI820	26.91	26.9	0.9984	2628.05	0.03229	427.169	477.008	427.169	9.75854	2.02072	Main stem
18/01/2016 01:20	112.502	2.02252	0	2750.73	LI820	26.92	26.9	0.9984	2647.53	0.03229	427.169	477.008	427.169	9.75854	2.0384	Main stem
18/01/2016 01:21	112.499	2.02312	0	2750.73	LI820	26.93	26.9	0.9984	2646.53	0.03229	427.169	477.008	427.169	9.75854	2.03749	Main stem
18/01/2016 01:22	112.496	2.02372	0	2750.73	LI820	26.92	26.9	0.9984	2647.8	0.03229	427.169	477.008	427.169	9.75854	2.03864	Main stem
18/01/2016 01:23	112.493	2.02431	0	2681.21	LI820	26.91	26.9	0.9984	2582.51	0.03229	427.169	477.008	427.169	9.75854	1.97939	Main stem
18/01/2016 01:24	112.491	2.02491	0	2708.45	LI820	26.91	26.9	0.9984	2609.02	0.03229	427.169	477.008	427.169	9.75854	2.00345	Main stem
18/01/2016 01:25	112.488	2.02551	0	2708.45	LI820	26.91	26.9	0.9984	2608.14	0.03229	427.169	477.008	427.169	9.75854	2.00265	Main stem
18/01/2016 01:26	112.485	2.02611	0	2700.93	LI820	26.91	26.9	0.9984	2600.69	0.03229	427.169	477.008	427.169	9.75854	1.99589	Main stem
18/01/2016 01:27	112.482	2.02671	0	2683.65	LI820	26.91	26.9	0.9984	2584.07	0.03229	427.169	477.008	427.169	9.75854	1.98081	Main stem
18/01/2016 01:28	112.48	2.02731	0	2693.61	LI820	26.91	26.9	0.9984	2593.59	0.03229	427.169	477.008	427.169	9.75854	1.98945	Main stem
18/01/2016 01:29	112.477	2.02791	0	2671.25	LI820	26.93	26.9	0.9984	2570.89	0.03229	427.169	477.008	427.169	9.75854	1.96885	Main stem
18/01/2016 01:30	112.474	2.02851	0	2683.65	LI820	26.93	26.9	0.9984	2582.75	0.03229	427.169	477.008	427.169	9.75854	1.97961	Main stem
18/01/2016 01:31	112.471	2.02929	0	2656.21	LI820	26.93	26.9	0.9984	2556.32	0.03229	427.169	477.008	427.169	9.75854	1.95562	Main stem
18/01/2016 01:32	112.468	2.02968	0	2696.05	LI820	26.94	26.9	0.9984	2593.59	0.03229	427.169	477.008	427.169	9.75854	1.98945	Main stem
18/01/2016 01:33	112.465	2.03005	0	2678.57	LI820	26.94	26.9	0.9984	2576.25	0.03229	427.169	477.008	427.169	9.75854	1.97371	Main stem
18/01/2016 01:34	112.462	2.03027	0	2683.65	LI820	26.93	26.9	0.9984	2581.98	0.03229	427.169	477.008	427.169	9.75854	1.97891	Main stem
18/01/2016 01:35	112.46	2.03049	0	2698.49	LI820	26.94	26.9	0.9984	2595.48	0.03229	427.169	477.008	427.169	9.75854	1.99116	Main stem
18/01/2016 01:36	112.457	2.03071	0	2703.57	LI820	26.94	26.91	0.9984	2600.53	0.03229	426.961	476.778	426.961	9.76092	1.99623	Main stem
18/01/2016 01:37	112.454	2.03093	0	2693.61	LI820	26.94	26.93	0.9984	2593.18	0.03227	426.544	476.317	426.544	9.76568	1.9893	Main stem
18/01/2016 01:38	112.451	2.03134	0	2733.45	LI820	26.95	26.95	0.9984	2633.25	0.03225	426.129	475.857	426.129	9.77045	2.0254	Main stem
18/01/2016 01:39	112.448	2.03174	0	2748.29	LI820	26.94	26.97	0.9984	2650.47	0.03223	425.713	475.397	425.713	9.77522	2.04075	Main stem
18/01/2016 01:40	112.445	2.03208	0	2720.85	LI820	26.94	26.99	0.9984	2626.05	0.03222	425.298	474.938	425.298	9.77998	2.01895	Main stem
18/01/2016 01:41	112.442	2.03218	0	2748.29	LI820	26.96	27	0.9984	2652.25	0.03221	425.091	474.709	425.091	9.78237	2.04259	Main stem
18/01/2016 01:42	112.439	2.03217	0	2753.17	LI820	26.97	27	0.9984	2655.37	0.03221	425.091	474.709	425.091	9.78237	2.04543	Main stem
18/01/2016 01:43	112.436	2.03215	0	2748.29	LI820	26.97	27	0.9984	2650.57	0.03221	425.091	474.709	425.091	9.78237	2.04107	Main stem
18/01/2016 01:44	112.433	2.03223	0	2738.33	LI820	26.97	27	0.9984	2641.86	0.03221	425.091	474.709	425.091	9.78237	2.03317	Main stem
18/01/2016 01:45	112.43	2.03229	0	2708.45	LI820	26.96	27	0.9984	2613.23	0.03221	425.091	474.709	425.091	9.78237	2.00719	Main stem
18/01/2016 01:46	112.427	2.03224	0	2765.77	LI820	26.96	27	0.9984	2669.05	0.03221	425.091	474.709	425.091	9.78237	2.05784	Main stem
18/01/2016 01:47	112.424	2.03205	0	2765.77	LI820	26.96	27	0.9984	2669.04	0.03221	425.091	474.709	425.091	9.78237	2.05783	Main stem
18/01/2016 01:48	112.421	2.03169	0	2793	LI820	26.97	27	0.9984	2694.35	0.03221	425.091	474.709	425.091	9.78237	2.0808	Main stem
18/01/2016 01:49	112.419	2.03087	0	2758.25	LI820	26.98	27	0.9984	2659.19	0.03221	425.091	474.709	425.091	9.78237	2.04889	Main stem
18/01/2016 01:50	112.416	2.02972	0	2790.57	LI820	26.98	27	0.9982	2689.7	0.03221	425.091	474.709	425.091	9.78237	2.07665	Main stem
18/01/2016 01:51	112.413	2.02845	0	2753.17	LI820	26.99	27	0.9982	2653.42	0.03221	425.091	474.709	425.091	9.78237	2.04373	Main stem
18/01/2016 01:52	112.411	2.02717	0	2802.96	LI820	27	27	0.9982	2699.26	0.03221	425.091	474.709	425.091	9.78237	2.08533	Main stem
18/01/2016 01:53	112.408	2.02602	0	2802.96	LI820	27	27	0.9982	2699.71	0.03221	425.091	474.709	425.091	9.78237	2.08574	Main stem
18/01/2016 01:54	112.405	2.02519	0	2815.36	LI820	26.98	27	0.9982	2713.57	0.03221	425.091	474.709	425.091	9.78237	2.09831	Main stem
18/01/2016 01:55	112.403	2.02493	0	2800.52	LI820	26.98	27	0.9982	2699.68	0.03221	425.091	474.709	425.091	9.78237	2.08571	Main stem
18/01/2016 01:56	112.4	2.02536	0	2845.24	LI820	26.98	27	0.9982	2742.31	0.03221	425.091	474.709	425.091	9.78237	2.12439	Main stem
18/01/2016 01:57	112.397	2.02671	0	2840.36	LI820	26.99	27	0.9982	2736.43	0.03221	425.091	474.709	425.091	9.78237	2.11906	Main stem
18/01/2016 01:58	112.395	2.02832	0	2855.2	LI820	26.99	27	0.9982	2751.31	0.03221	425.091	474.709	425.091	9.78237	2.13256	Main stem
18/01/2016 01:59	112.393	2.02998	0	2877.56	LI820	26.99	27	0.9982	2772.61	0.03221	425.091	474.709	425.091	9.78237	2.15189	Main stem
18/01/2016 02:00	112.39	2.03165	0	2882.64	LI820	26.99	27	0.9982	2777.94	0.03221	425.091	474.709	425.091	9.78237	2.15673	Main stem
18/01/2016 02:01	112.388	2.03309	0	2872.68	LI820	27.01	27	0.9982	2764.98	0.03221	425.091	474.709	425.091	9.78237	2.14497	Main stem
18/01/2016 02:02	112.385	2.03429	0	2885.08	LI820	27.04	27	0.9982	2773.63	0.03221	425.091	474.709	425.091	9.78237	2.15281	Main stem
18/01/2016 02:03	112.383	2.03548	0	2880	LI820	27.04	27	0.9982	2768.74	0.03221	425.091	474.709	425.091	9.78237	2.14838	Main stem
18/01/2016 02:04	112.38	2.03669	0	2860.28	LI820	27.04	27	0.9982	2750.29	0.03221	425.091	474.709	425.091	9.78237	2.13163	Main stem
18/01/2016 02:05	112.377	2.03741	0	2880	LI820	27.04	27	0.9984	2768.7	0.03221	425.091	474.709	425.091	9.78237	2.14827	Main stem
18/01/2016 02:06	112.374	2.038	0	2862.72	LI820	27.08	27	0.9984	2747.82	0.03221	425.091	474.709	425.091	9.78237	2.12932	Main stem
18/01/2016 02:07	112.371	2.03853	0	2870.04	LI820	27.09	27	0.9984	2753.89	0.03221	425.091	474.709	425.091	9.78237	2.13483	Main stem
18/01/2016 02:08	112.368	2.03919	0	2842.8	LI820	27.1	27	0.9984	2726.06	0.03221	425.091	474.709	425.091	9.78237	2.10957	Main stem
18/01/2016 02:09	112.365	2.03979	0	2889.96	LI820	27.07	27	0.9984	2775.18	0.03221	425.091	474.709	425.091	9.78237	2.15415	Main stem
18/01/2016 02:10	112.362	2.04057	0	2875.12	LI820	27.07	27	0.9984	2761.44	0.03221	425.091	474.709	425.091	9.78237	2.14168	Main stem
18/01/2016 02:11	112.36	2.04146	0	2895.04	LI820	27.08	27.02	0.9984	2781.23	0.03219	424.676	474.25	424.676	9.78714	2.15935	Main stem
18/01/2016 02:12	112.357	2.0425	0	2895.04	LI820	27.09	27.04	0.9984	2781.93	0.03217	424.262	473.792	424.262	9.79192	2.1597	Main stem
18/01/2016 02:13	112.354	2.04365	0	2877.56	LI820	27.11	27.06	0.9984	2764.76	0.03216	423.848	473.334	423.848	9.79669	2.1445	Main stem
18/01/2016 02:14	112.351	2.04495	0	2912.32	LI820	27.13	27.08	0.9984	2798.45	0.03214	423.435	472.877	423.435	9.80147	2.17478	Main stem
18/01/2016 02:15	112.349	2.04643	0	2875.12	LI820	27.13	27.1	0.9984	2764.62	0.03212	423.022	472.421	423.022	9.80626	2.1438	Main stem
18/01/2016 02:16	112.346	2.04798	0	2912.32	LI820	27.14	27.08	0.9982	2796.86	0.03214	423.435	472.877	423.435	9.80147	2.17341	Main stem
18/01/2016 02:17	112.344	2.04959	0	2922.28	LI820	27.13	27.06	0.9982	2805.05	0.03216	423.848	473.334	423.848	9.79669	2.18113	Main stem
18/01/2016 02:18	112.342	2.05134	0	2922.28	LI820	27.13	27.04	0.9982	2802.11	0.03217	424.262	473.792	424.262	9.79192	2.17808	Main stem
18/01/2016 02:19	112.339	2.05314	0	2934.88	LI820	27.15	27.02	0.9982	2809.92	0.03219	424.676	474.25	424.676	9.78714	2.18546	Main stem
18/01/2016 02:20	112.337	2.05488	0	2939.76	LI820	27.15	27	0.9982	2812.59	0.03221	425.091	474.709	425.091	9.78237	2.18817	Main stem
18/01/2016 02:21	112.334	2.05627	0	2919.84	LI820	27.15	27.02	0.9982	2795.75	0.03219	424.676	474.25	424.676	9.78714	2.1726	Main stem
18/01/2016 02:22	112.332	2.057	0	2952.15	LI820	27.14	27.04	0.9982	2830.49	0.03217	424.262	473.792	424.262	9.79192	2.20382	Main stem
18/01/2016 02:23	112.329	2.05734	0	2929.8	LI820	27.15	27.06	0.9982	2809.87	0.03216	423.848	473.334	423.848	9.79669	2.1855	Main stem
18/01/2016 02:24	112.326	2.05762	0	2982.03	LI820	27.15	27.08	0.9982	2862.3	0.03214	423.435	472.877	423.435	9.80147	2.23278	Main stem
18/01/2016 02:25	112.323	2.05772	0	2974.51	LI820	27.16	27.1	0.9982	2856.63	0.03212	423.022	472.421	423.022	9.80626	2.22733	Main stem
18/01/2016 02:26	112.321	2.05762	0	2994.43	LI820	27.16	27.1	0.9982	2875.1	0.03212	423.022	472.421	423.022	9.80626	2.24409	Main stem
18/01/2016 02:27	112.318	2.0574	0	2979.59	LI820	27.18	27.1	0.9982	2858.09	0.03212	423.022	472.421	423.022	9.80626	2.22866	Main stem
18/01/2016 02:28	112.315	2.05705	0	2949.72	LI820	27.21	27.1	0.9982	2826.61	0.03212	423.022	472.421	423.022	9.80626	2.2001	Main stem
18/01/2016 02:29	112.312	2.05696	0	2962.11	LI820	27.21	27.1	0.9982	2838.09	0.03212	423.022	472.421	423.022	9.80626	2.21052	Main stem
18/01/2016 02:30	112.31	2.05703	0	2969.63	LI820	27.21	27.1	0.9982	2846.1	0.03212	423.022	472.421	423.022	9.80626	2.21778	Main stem
18/01/2016 02:31	112.307	2.05715	0	2991.99	LI820	27.2	27.1	0.9982	2868.18	0.03212	423.022	472.421	423.022	9.80626	2.23781	Main stem
18/01/2016 02:32	112.305	2.05735	0	2987.11	LI820	27.21	27.1	0.9982	2861.67	0.03212	423.022	472.421	423.022	9.80626	2.23191	Main stem
18/01/2016 02:33	112.302	2.05759	0	2959.67	LI820	27.22	27.1	0.9982	2835.26	0.03212	423.022	472.421	423.022	9.80626	2.20795	Main stem
18/01/2016 02:34	112.3	2.05786	0	2987.11	LI820	27.22	27.1	0.9982	2861	0.03212	423.022	472.421	423.022	9.80626	2.2313	Main stem
18/01/2016 02:35	112.297	2.0582	0	2982.03	LI820	27.22	27.1	0.9982	2856.02	0.03212	423.022	472.421	423.022	9.80626	2.22678	Main stem
18/01/2016 02:36	112.294	2.05858	0	2982.03	LI820	27.23	27.1	0.9982	2855.05	0.03212	423.022	472.421	423.022	9.80626	2.2259	Main stem
18/01/2016 02:37	112.292	2.05907	0	2972.07	LI820	27.23	27.1	0.9982	2844.91	0.03212	423.022	472.421	423.022	9.80626	2.2167	Main stem
18/01/2016 02:38	112.289	2.05966	0	2982.03	LI820	27.22	27.1	0.9981	2855.05	0.03212	423.022	472.421	423.022	9.80626	2.22594	Main stem
18/01/2016 02:39	112.287	2.06008	0	2982.03	LI820	27.23	27.1	0.9981	2854.13	0.03212	423.022	472.421	423.022	9.80626	2.2251	Main stem
18/01/2016 02:40	112.284	2.06055	0	2991.99	LI820	27.23	27.1	0.9981	2863.81	0.03212	423.022	472.421	423.022	9.80626	2.23388	Main stem
18/01/2016 02:41	112.282	2.06101	0	2974.51	LI820	27.23	27.11	0.9981	2848.65	0.03211	422.816	472.192	422.816	9.80865	2.21998	Main stem
18/01/2016 02:42	112.28	2.0614	0	3001.95	LI820	27.24	27.12	0.9981	2875.46	0.0321	422.61	471.964	422.61	9.81104	2.24415	Main stem
18/01/2016 02:43	112.28	2.06148	0	2994.43	LI820	27.23	27.14	0.9981	2870.42	0.03209	422.198	471.508	422.198	9.81583	2.23997	Main stem
18/01/2016 02:44	112.278	2.06224	0	2994.43	LI820	27.21	27.15	0.9981	2874	0.03208	421.992	471.281	421.992	9.81822	2.24307	Main stem
18/01/2016 02:45	112.275	2.06311	0	3006.83	LI820	27.22	27.16	0.9981	2886.66	0.03207	421.786	471.053	421.786	9.82061	2.2544	Main stem
18/01/2016 02:46	112.272	2.06324	0	2974.51	LI820	27.23	27.17	0.9981	2856.12	0.03206	421.58	470.826	421.58	9.82301	2.22655	Main stem
18/01/2016 02:47	112.269	2.06313	0	2999.51	LI820	27.23	27.19	0.9981	2880.93	0.03205	421.169	470.371	421.169	9.8278	2.24944	Main stem
18/01/2016 02:48	112.266	2.06288	0	2979.59	LI820	27.22	27.2	0.9981	2865.15	0.03204	420.964	470.144	420.964	9.8302	2.23498	Main stem
18/01/2016 02:49	112.264	2.06236	0	2949.72	LI820	27.23	27.2	0.9981	2834.93	0.03204	420.964	470.144	420.964	9.8302	2.20756	Main stem
18/01/2016 02:50	112.261	2.06188	0	2957.24	LI820	27.26	27.2	0.9981	2838.61	0.03204	420.964	470.144	420.964	9.8302	2.2109	Main stem
18/01/2016 02:51	112.258	2.06201	0	2967.2	LI820	27.28	27.2	0.9981	2845.17	0.03204	420.964	470.144	420.964	9.8302	2.21685	Main stem
18/01/2016 02:52	112.256	2.06256	0	2962.11	LI820	27.28	27.2	0.9981	2841.22	0.03204	420.964	470.144	420.964	9.8302	2.21327	Main stem
18/01/2016 02:53	112.253	2.06359	0	2962.11	LI820	27.25	27.2	0.9981	2844.55	0.03204	420.964	470.144	420.964	9.8302	2.21629	Main stem
18/01/2016 02:54	112.251	2.06478	0	2979.59	LI820	27.24	27.2	0.9981	2861.93	0.03204	420.964	470.144	420.964	9.8302	2.23205	Main stem
18/01/2016 02:55	112.248	2.06598	0	2964.55	LI820	27.26	27.2	0.9979	2844.94	0.03204	420.964	470.144	420.964	9.8302	2.21672	Main stem
18/01/2016 02:56	112.246	2.06729	0	2969.63	LI820	27.28	27.2	0.9979	2848.03	0.03204	420.964	470.144	420.964	9.8302	2.21952	Main stem
18/01/2016 02:57	112.244	2.06854	0	2969.63	LI820	27.29	27.2	0.9979	2846.71	0.03204	420.964	470.144	420.964	9.8302	2.21832	Main stem
18/01/2016 02:58	112.241	2.06984	0	2944.84	LI820	27.29	27.2	0.9979	2823.15	0.03204	420.964	470.144	420.964	9.8302	2.19695	Main stem
18/01/2016 02:59	112.239	2.07117	0	2984.47	LI820	27.29	27.2	0.9979	2860.23	0.03204	420.964	470.144	420.964	9.8302	2.23059	Main stem
18/01/2016 03:00	112.236	2.07226	0	2999.51	LI820	27.31	27.2	0.9979	2872.98	0.03204	420.964	470.144	420.964	9.8302	2.24215	Main stem
18/01/2016 03:01	112.233	2.07339	0	2962.11	LI820	27.31	27.2	0.9979	2836.47	0.03204	420.964	470.144	420.964	9.8302	2.20903	Main stem
18/01/2016 03:02	112.231	2.07456	0	2932.24	LI820	27.3	27.2	0.9978	2808.48	0.03204	420.964	470.144	420.964	9.8302	2.18368	Main stem
18/01/2016 03:03	112.228	2.07566	0	2954.59	LI820	27.33	27.2	0.9978	2826.18	0.03204	420.964	470.144	420.964	9.8302	2.19974	Main stem
18/01/2016 03:04	112.226	2.07712	0	2954.59	LI820	27.36	27.2	0.9978	2822.41	0.03204	420.964	470.144	420.964	9.8302	2.19632	Main stem
18/01/2016 03:05	112.224	2.07884	0	2967.2	LI820	27.29	27.2	0.9978	2843.54	0.03204	420.964	470.144	420.964	9.8302	2.21548	Main stem
18/01/2016 03:06	112.222	2.08062	0	2967.2	LI820	27.29	27.2	0.9978	2843.78	0.03204	420.964	470.144	420.964	9.8302	2.2157	Main stem
18/01/2016 03:07	112.219	2.08226	0	2959.67	LI820	27.29	27.2	0.9978	2835.82	0.03204	420.964	470.144	420.964	9.8302	2.20848	Main stem
18/01/2016 03:08	112.217	2.08326	0	2952.15	LI820	27.29	27.2	0.9978	2829.06	0.03204	420.964	470.144	420.964	9.8302	2.20235	Main stem
18/01/2016 03:09	112.214	2.08286	0	2944.84	LI820	27.32	27.22	0.9978	2820.7	0.03202	420.554	469.69	420.554	9.83499	2.19447	Main stem
18/01/2016 03:10	112.212	2.08106	0	2967.2	LI820	27.33	27.24	0.9976	2842.47	0.03201	420.144	469.236	420.144	9.83979	2.21467	Main stem
18/01/2016 03:11	112.211	2.07893	0	2967.2	LI820	27.32	27.26	0.9976	2846.53	0.03199	419.734	468.783	419.734	9.84459	2.21805	Main stem
18/01/2016 03:12	112.209	2.07672	0	2954.59	LI820	27.32	27.28	0.9976	2836.88	0.03197	419.325	468.33	419.325	9.84939	2.20899	Main stem
18/01/2016 03:13	112.207	2.07481	0	2934.88	LI820	27.3	27.3	0.9976	2822.28	0.03196	418.916	467.878	418.916	9.8542	2.19614	Main stem
18/01/2016 03:14	112.205	2.07308	0	2902.56	LI820	27.32	27.3	0.9976	2789.44	0.03195	418.916	467.878	418.916	9.8542	2.16567	Main stem
18/01/2016 03:15	112.203	2.07169	0	2917.4	LI820	27.34	27.3	0.9976	2801.78	0.03195	418.916	467.878	418.916	9.8542	2.17686	Main stem
18/01/2016 03:16	112.201	2.07192	0	2887.52	LI820	27.36	27.3	0.9976	2769.97	0.03195	418.916	467.878	418.916	9.8542	2.14802	Main stem
18/01/2016 03:17	112.199	2.07324	0	2887.52	LI820	27.37	27.3	0.9976	2769.03	0.03195	418.916	467.878	418.916	9.8542	2.14716	Main stem
18/01/2016 03:18	112.197	2.07492	0	2887.52	LI820	27.36	27.3	0.9976	2769.08	0.03195	418.916	467.878	418.916	9.8542	2.14721	Main stem
18/01/2016 03:19	112.195	2.07696	0	2919.84	LI820	27.36	27.3	0.9976	2801.2	0.03195	418.916	467.878	418.916	9.8542	2.17633	Main stem
18/01/2016 03:20	112.193	2.07905	0	2912.32	LI820	27.39	27.3	0.9976	2790.21	0.03195	418.916	467.878	418.916	9.8542	2.16637	Main stem
18/01/2016 03:21	112.191	2.08065	0	2944.84	LI820	27.34	27.3	0.9976	2827.07	0.03195	418.916	467.878	418.916	9.8542	2.19979	Main stem
18/01/2016 03:22	112.189	2.08155	0	2967.2	LI820	27.37	27.3	0.9976	2845.54	0.03195	418.916	467.878	418.916	9.8542	2.21654	Main stem
18/01/2016 03:23	112.186	2.08165	0	2917.4	LI820	27.37	27.3	0.9976	2797.8	0.03195	418.916	467.878	418.916	9.8542	2.17325	Main stem
18/01/2016 03:24	112.184	2.08156	0	2944.84	LI820	27.39	27.3	0.9975	2820.53	0.03195	418.916	467.878	418.916	9.8542	2.1939	Main stem
18/01/2016 03:25	112.181	2.08155	0	2895.04	LI820	27.41	27.3	0.9975	2771.13	0.03195	418.916	467.878	418.916	9.8542	2.14911	Main stem
18/01/2016 03:26	112.178	2.08141	0	2917.4	LI820	27.41	27.3	0.9975	2791.81	0.03195	418.916	467.878	418.916	9.8542	2.16786	Main stem
18/01/2016 03:27	112.176	2.08146	0	2932.24	LI820	27.42	27.3	0.9975	2804.93	0.03195	418.916	467.878	418.916	9.8542	2.17975	Main stem
18/01/2016 03:28	112.173	2.08169	0	2887.52	LI820	27.43	27.3	0.9975	2761.35	0.03195	418.916	467.878	418.916	9.8542	2.14024	Main stem
18/01/2016 03:29	112.171	2.08316	0	2867.6	LI820	27.44	27.3	0.9975	2740.63	0.03195	418.916	467.878	418.916	9.8542	2.12145	Main stem
18/01/2016 03:30	112.169	2.08517	0	2840.36	LI820	27.44	27.3	0.9973	2713.63	0.03195	418.916	467.878	418.916	9.8542	2.09704	Main stem
18/01/2016 03:31	112.167	2.08725	0	2862.72	LI820	27.43	27.3	0.9973	2736.86	0.03195	418.916	467.878	418.916	9.8542	2.1181	Main stem
18/01/2016 03:32	112.166	2.08927	0	2862.72	LI820	27.43	27.3	0.9973	2736.06	0.03195	418.916	467.878	418.916	9.8542	2.11738	Main stem
18/01/2016 03:33	112.165	2.09151	0	2862.72	LI820	27.4	27.3	0.9973	2740.11	0.03195	418.916	467.878	418.916	9.8542	2.12105	Main stem
18/01/2016 03:34	112.163	2.09378	0	2872.68	LI820	27.34	27.3	0.9973	2756.87	0.03195	418.916	467.878	418.916	9.8542	2.13625	Main stem
18/01/2016 03:35	112.162	2.09611	0	2895.04	LI820	27.36	27.3	0.9973	2776.25	0.03195	418.916	467.878	418.916	9.8542	2.15382	Main stem
18/01/2016 03:36	112.161	2.09852	0	2837.72	LI820	27.39	27.3	0.9973	2717.07	0.03195	418.916	467.878	418.916	9.8542	2.10016	Main stem
18/01/2016 03:37	112.16	2.1011	0	2855.2	LI820	27.41	27.3	0.9972	2730.77	0.03195	418.916	467.878	418.916	9.8542	2.11262	Main stem
18/01/2016 03:38	112.16	2.10378	0	2850.32	LI820	27.43	27.3	0.9972	2724.64	0.03195	418.916	467.878	418.916	9.8542	2.10706	Main stem
18/01/2016 03:39	112.159	2.10654	0	2845.24	LI820	27.42	27.32	0.9972	2722.47	0.03194	418.508	467.426	418.508	9.85901	2.10546	Main stem
18/01/2016 03:40	112.159	2.10944	0	2862.72	LI820	27.42	27.34	0.9972	2741.63	0.03192	418.1	466.975	418.1	9.86381	2.12254	Main stem
18/01/2016 03:41	112.159	2.11232	0	2857.64	LI820	27.44	27.36	0.9972	2737.35	0.03191	417.692	466.524	417.692	9.86863	2.11903	Main stem
18/01/2016 03:42	112.16	2.11526	0	2818.01	LI820	27.44	27.38	0.9972	2700.79	0.03189	417.285	466.073	417.285	9.87344	2.08558	Main stem
18/01/2016 03:43	112.16	2.11826	0	2808.05	LI820	27.45	27.4	0.9972	2692.28	0.03187	416.878	465.623	416.878	9.87826	2.07758	Main stem
18/01/2016 03:44	112.16	2.12123	0	2775.73	LI820	27.46	27.38	0.9972	2658.47	0.03189	417.285	466.073	417.285	9.87344	2.04721	Main stem
18/01/2016 03:45	112.159	2.12408	0	2775.73	LI820	27.46	27.36	0.9972	2656.02	0.0319	417.692	466.524	417.692	9.86863	2.04463	Main stem
18/01/2016 03:46	112.159	2.12675	0	2775.73	LI820	27.47	27.34	0.9972	2652.65	0.03192	418.1	466.975	418.1	9.86381	2.04186	Main stem
18/01/2016 03:47	112.158	2.12932	0	2768.21	LI820	27.45	27.32	0.9972	2646.22	0.03194	418.508	467.426	418.508	9.85901	2.03631	Main stem
18/01/2016 03:48	112.157	2.13168	0	2825.32	LI820	27.4	27.3	0.9972	2704.49	0.03195	418.916	467.878	418.916	9.8542	2.08879	Main stem
18/01/2016 03:49	112.156	2.13393	0	2855.2	LI820	27.39	27.32	0.9972	2735.71	0.03194	418.508	467.426	418.508	9.85901	2.11747	Main stem
18/01/2016 03:50	112.155	2.13598	0	2862.72	LI820	27.4	27.34	0.9972	2744.47	0.03192	418.1	466.975	418.1	9.86381	2.12512	Main stem
18/01/2016 03:51	112.153	2.13726	0	2852.76	LI820	27.4	27.36	0.9973	2737.03	0.0319	417.692	466.524	417.692	9.86863	2.11804	Main stem
18/01/2016 03:52	112.15	2.13721	0	2912.32	LI820	27.42	27.38	0.9973	2794.07	0.03189	417.285	466.073	417.285	9.87344	2.17013	Main stem
18/01/2016 03:53	112.148	2.13656	0	2912.32	LI820	27.46	27.4	0.9973	2791.53	0.03187	416.878	465.623	416.878	9.87826	2.16753	Main stem
18/01/2016 03:54	112.145	2.13533	0	2872.68	LI820	27.52	27.42	0.9973	2749.64	0.03185	416.472	465.174	416.472	9.88307	2.12925	Main stem
18/01/2016 03:55	112.143	2.13407	0	2880	LI820	27.53	27.44	0.9973	2757.71	0.03184	416.066	464.724	416.066	9.88789	2.13693	Main stem
18/01/2016 03:56	112.141	2.13273	0	2902.56	LI820	27.55	27.46	0.9973	2779.06	0.03182	415.66	464.276	415.66	9.89272	2.15599	Main stem
18/01/2016 03:57	112.139	2.13144	0	2872.68	LI820	27.57	27.48	0.9973	2750.42	0.0318	415.255	463.827	415.255	9.89754	2.12972	Main stem
18/01/2016 03:58	112.136	2.13033	0	2899.92	LI820	27.56	27.5	0.9973	2779.52	0.03179	414.85	463.38	414.85	9.90237	2.15648	Main stem
18/01/2016 03:59	112.134	2.12945	0	2865.16	LI820	27.58	27.52	0.9973	2746.12	0.03177	414.446	462.932	414.446	9.9072	2.12589	Main stem
18/01/2016 04:00	112.131	2.12877	0	2899.92	LI820	27.59	27.54	0.9972	2780.63	0.03175	414.042	462.485	414.042	9.91203	2.15691	Main stem
18/01/2016 04:01	112.128	2.12813	0	2899.92	LI820	27.6	27.56	0.9972	2781.18	0.03174	413.638	462.039	413.638	9.91687	2.15778	Main stem
18/01/2016 04:02	112.126	2.12768	0	2887.52	LI820	27.61	27.58	0.9972	2770.98	0.03172	413.235	461.593	413.235	9.9217	2.14822	Main stem
18/01/2016 04:03	112.123	2.12709	0	2895.04	LI820	27.62	27.6	0.9972	2778.31	0.03171	412.832	461.147	412.832	9.92654	2.15524	Main stem
18/01/2016 04:04	112.121	2.12672	0	2895.04	LI820	27.65	27.58	0.9972	2772.79	0.03172	413.235	461.593	413.235	9.9217	2.14986	Main stem
18/01/2016 04:05	112.118	2.12688	0	2875.12	LI820	27.66	27.56	0.9972	2749.72	0.03174	413.638	462.039	413.638	9.91687	2.12926	Main stem
18/01/2016 04:06	112.116	2.12802	0	2927.36	LI820	27.67	27.54	0.9972	2796.77	0.03176	414.042	462.485	414.042	9.91203	2.17222	Main stem
18/01/2016 04:07	112.114	2.13021	0	2942.19	LI820	27.67	27.52	0.9972	2807.59	0.03177	414.446	462.932	414.446	9.9072	2.18165	Main stem
18/01/2016 04:08	112.113	2.13239	0	2964.55	LI820	27.68	27.5	0.9972	2826.77	0.03179	414.85	463.38	414.85	9.90237	2.19935	Main stem
18/01/2016 04:09	112.111	2.13402	0	2947.28	LI820	27.66	27.52	0.9972	2813.88	0.03177	414.446	462.932	414.446	9.9072	2.18735	Main stem
18/01/2016 04:10	112.109	2.1354	0	2947.28	LI820	27.68	27.54	0.9972	2814.49	0.03175	414.042	462.485	414.042	9.91203	2.1876	Main stem
18/01/2016 04:11	112.107	2.13688	0	2957.24	LI820	27.67	27.56	0.9972	2827.13	0.03174	413.638	462.039	413.638	9.91687	2.19943	Main stem
18/01/2016 04:12	112.104	2.13814	0	2927.36	LI820	27.68	27.58	0.9971	2799.13	0.03172	413.235	461.593	413.235	9.9217	2.17378	Main stem
18/01/2016 04:13	112.102	2.1392	0	2942.19	LI820	27.7	27.6	0.9971	2813.45	0.0317	412.832	461.147	412.832	9.92654	2.18644	Main stem
18/01/2016 04:14	112.099	2.13986	0	2967.2	LI820	27.74	27.62	0.9971	2835.85	0.03169	412.43	460.702	412.43	9.93139	2.20712	Main stem
18/01/2016 04:15	112.097	2.14032	0	2977.15	LI820	27.75	27.64	0.9971	2845.39	0.03167	412.028	460.257	412.028	9.93623	2.21545	Main stem
18/01/2016 04:16	112.094	2.14051	0	3011.91	LI820	27.75	27.66	0.9971	2881.02	0.03166	411.626	459.812	411.626	9.94108	2.24813	Main stem
18/01/2016 04:17	112.091	2.14022	0	3049.11	LI820	27.75	27.68	0.9971	2918.98	0.03164	411.225	459.369	411.225	9.94592	2.28221	Main stem
18/01/2016 04:18	112.089	2.13976	0	3066.59	LI820	27.77	27.7	0.9969	2935.38	0.03162	410.824	458.925	410.824	9.95077	2.29681	Main stem
18/01/2016 04:19	112.086	2.13922	0	3049.11	LI820	27.8	27.72	0.9969	2916.99	0.03161	410.424	458.482	410.424	9.95563	2.28054	Main stem
18/01/2016 04:20	112.084	2.13849	0	3029.19	LI820	27.86	27.74	0.9969	2892.63	0.03159	410.024	458.039	410.024	9.96048	2.25813	Main stem
18/01/2016 04:21	112.081	2.13786	0	2989.55	LI820	27.84	27.76	0.9969	2860.22	0.03157	409.624	457.597	409.624	9.96534	2.22844	Main stem
18/01/2016 04:22	112.078	2.13747	0	2982.03	LI820	27.82	27.78	0.9969	2857.41	0.03156	409.225	457.155	409.225	9.9702	2.22627	Main stem
18/01/2016 04:23	112.076	2.13743	0	3001.95	LI820	27.85	27.8	0.9969	2874.93	0.03154	408.826	456.714	408.826	9.97506	2.24182	Main stem
18/01/2016 04:24	112.073	2.13755	0	3019.43	LI820	27.86	27.78	0.9969	2888.33	0.03156	409.225	457.155	409.225	9.9702	2.25429	Main stem
18/01/2016 04:25	112.07	2.1379	0	2991.99	LI820	27.86	27.76	0.9969	2859.75	0.03158	409.624	457.597	409.624	9.96534	2.22872	Main stem
18/01/2016 04:26	112.068	2.13876	0	2962.11	LI820	27.85	27.74	0.9969	2829.72	0.03159	410.024	458.039	410.024	9.96048	2.20112	Main stem
18/01/2016 04:27	112.065	2.13995	0	2967.2	LI820	27.85	27.72	0.9969	2832.59	0.03161	410.424	458.482	410.424	9.95563	2.20404	Main stem
18/01/2016 04:28	112.063	2.14094	0	2937.32	LI820	27.83	27.7	0.9968	2803.39	0.03162	410.824	458.925	410.824	9.95077	2.17724	Main stem
18/01/2016 04:29	112.061	2.14181	0	2954.59	LI820	27.81	27.72	0.9968	2825.24	0.03161	410.424	458.482	410.424	9.95563	2.19742	Main stem
18/01/2016 04:30	112.059	2.14274	0	2974.51	LI820	27.78	27.74	0.9968	2851.56	0.03159	410.024	458.039	410.024	9.96048	2.22095	Main stem
18/01/2016 04:31	112.057	2.14363	0	2979.59	LI820	27.76	27.76	0.9968	2860.4	0.03157	409.624	457.597	409.624	9.96534	2.22864	Main stem
18/01/2016 04:32	112.054	2.14457	0	2987.11	LI820	27.75	27.78	0.9968	2871.68	0.03156	409.225	457.155	409.225	9.9702	2.23924	Main stem
18/01/2016 04:33	112.052	2.14566	0	2991.99	LI820	27.79	27.8	0.9968	2872.49	0.03154	408.826	456.714	408.826	9.97506	2.23964	Main stem
18/01/2016 04:34	112.05	2.14658	0	3001.95	LI820	27.83	27.8	0.9968	2876.8	0.03154	408.826	456.714	408.826	9.97506	2.24355	Main stem
18/01/2016 04:35	112.047	2.1475	0	3001.95	LI820	27.86	27.8	0.9966	2872.46	0.03154	408.826	456.714	408.826	9.97506	2.23969	Main stem
18/01/2016 04:36	112.045	2.14846	0	2959.67	LI820	27.89	27.8	0.9966	2829.48	0.03154	408.826	456.714	408.826	9.97506	2.20075	Main stem
18/01/2016 04:37	112.042	2.14946	0	2987.11	LI820	27.91	27.8	0.9966	2852.55	0.03154	408.826	456.714	408.826	9.97506	2.22165	Main stem
18/01/2016 04:38	112.04	2.15053	0	2982.03	LI820	27.94	27.8	0.9966	2843.8	0.03154	408.826	456.714	408.826	9.97506	2.21372	Main stem
18/01/2016 04:39	112.038	2.15165	0	2934.88	LI820	27.95	27.82	0.9966	2800.75	0.03152	408.427	456.273	408.427	9.97993	2.1744	Main stem
18/01/2016 04:40	112.035	2.15256	0	2991.99	LI820	27.92	27.84	0.9965	2860.04	0.03151	408.029	455.833	408.029	9.9848	2.22853	Main stem
18/01/2016 04:41	112.034	2.15303	0	2991.99	LI820	27.91	27.86	0.9965	2864.27	0.03149	407.632	455.393	407.632	9.98966	2.23203	Main stem
18/01/2016 04:42	112.034	2.15307	0	2987.11	LI820	27.95	27.88	0.9965	2856.43	0.03148	407.234	454.953	407.234	9.99454	2.2253	Main stem
18/01/2016 04:43	112.033	2.15312	0	2982.03	LI820	27.95	27.9	0.9965	2853.9	0.03146	406.837	454.514	406.837	9.99941	2.22268	Main stem
18/01/2016 04:44	112.033	2.15336	0	2977.15	LI820	27.96	27.9	0.9965	2848.24	0.03146	406.837	454.514	406.837	9.99941	2.21755	Main stem
18/01/2016 04:45	112.03	2.15401	0	2977.15	LI820	27.94	27.9	0.9965	2851.41	0.03146	406.837	454.514	406.837	9.99941	2.22043	Main stem
18/01/2016 04:46	112.028	2.15449	0	2952.15	LI820	27.89	27.9	0.9965	2832.68	0.03146	406.837	454.514	406.837	9.99941	2.20346	Main stem
18/01/2016 04:47	112.025	2.15489	0	2989.55	LI820	27.88	27.9	0.9965	2870.6	0.03146	406.837	454.514	406.837	9.99941	2.23781	Main stem
18/01/2016 04:48	112.022	2.15546	0	2974.51	LI820	27.89	27.9	0.9963	2854.4	0.03146	406.837	454.514	406.837	9.99941	2.22321	Main stem
18/01/2016 04:49	112.02	2.15583	0	3009.47	LI820	27.92	27.9	0.9963	2883.16	0.03146	406.837	454.514	406.837	9.99941	2.24927	Main stem
18/01/2016 04:50	112.018	2.15658	0	2972.07	LI820	27.96	27.9	0.9963	2843.38	0.03146	406.837	454.514	406.837	9.99941	2.21322	Main stem
18/01/2016 04:51	112.016	2.15722	0	2952.15	LI820	27.99	27.9	0.9963	2820.04	0.03146	406.837	454.514	406.837	9.99941	2.19208	Main stem
18/01/2016 04:52	112.013	2.15701	0	2962.11	LI820	27.97	27.9	0.9963	2831.75	0.03146	406.837	454.514	406.837	9.99941	2.20269	Main stem
18/01/2016 04:53	112.011	2.15667	0	2962.11	LI820	27.98	27.9	0.9963	2831.35	0.03146	406.837	454.514	406.837	9.99941	2.20233	Main stem
18/01/2016 04:54	112.008	2.15603	0	2949.72	LI820	27.99	27.9	0.9963	2818.16	0.03146	406.837	454.514	406.837	9.99941	2.19038	Main stem
18/01/2016 04:55	112.006	2.15545	0	2959.67	LI820	27.98	27.91	0.9963	2829.89	0.03145	406.639	454.295	406.639	10.0018	2.20084	Main stem
18/01/2016 04:56	112.003	2.15469	0	2942.19	LI820	27.99	27.92	0.9963	2814.13	0.03144	406.441	454.075	406.441	10.0043	2.1864	Main stem
18/01/2016 04:57	112.001	2.15385	0	2994.43	LI820	28	27.93	0.9963	2862.87	0.03143	406.243	453.856	406.243	10.0067	2.23039	Main stem
18/01/2016 04:58	111.998	2.15296	0	3021.87	LI820	28.02	27.94	0.9963	2887.87	0.03143	406.045	453.637	406.045	10.0092	2.25358	Main stem
18/01/2016 05:09	111.974	2.14281	0	2895.04	LI820	28.15	28.05	0.996	2763.71	0.03134	403.873	451.234	403.873	10.036	2.1408	Main stem
18/01/2016 05:10	111.972	2.14281	0	2957.24	LI820	28.13	28.06	0.996	2826.74	0.03133	403.676	451.016	403.676	10.0385	2.19773	Main stem
18/01/2016 05:11	111.969	2.14289	0	2944.84	LI820	28.14	28.07	0.996	2814.11	0.03132	403.479	450.798	403.479	10.0409	2.18612	Main stem
18/01/2016 05:12	111.967	2.14341	0	2949.72	LI820	28.15	28.08	0.996	2818.81	0.03131	403.283	450.581	403.283	10.0434	2.19022	Main stem
18/01/2016 05:13	111.965	2.14428	0	2989.55	LI820	28.2	28.09	0.996	2851.71	0.0313	403.086	450.363	403.086	10.0458	2.21984	Main stem
18/01/2016 05:14	111.963	2.14546	0	3029.19	LI820	28.23	28.09	0.9959	2885.14	0.03131	403.086	450.363	403.086	10.0458	2.25087	Main stem
18/01/2016 05:15	111.961	2.14704	0	3074.11	LI820	28.25	28.07	0.9959	2922.3	0.03132	403.479	450.798	403.479	10.0409	2.28415	Main stem
18/01/2016 05:16	111.96	2.14898	0	3046.67	LI820	28.27	28.05	0.9959	2892.08	0.03134	403.873	451.234	403.873	10.036	2.25712	Main stem
18/01/2016 05:17	111.958	2.15092	0	3019.43	LI820	28.24	28.03	0.9959	2867.15	0.03135	404.267	451.67	404.267	10.0311	2.23416	Main stem
18/01/2016 05:18	111.957	2.15277	0	3019.43	LI820	28.29	28.01	0.9959	2858.95	0.03137	404.661	452.106	404.661	10.0263	2.22707	Main stem
18/01/2016 05:19	111.956	2.15471	0	3019.43	LI820	28.26	28.01	0.9959	2863.56	0.03137	404.661	452.106	404.661	10.0263	2.23124	Main stem
18/01/2016 05:20	111.955	2.15665	0	3009.47	LI820	28.14	28.03	0.9959	2870.94	0.03136	404.267	451.67	404.267	10.0311	2.23831	Main stem
18/01/2016 05:21	111.954	2.1586	0	3004.39	LI820	28.11	28.05	0.9959	2872.63	0.03134	403.873	451.234	403.873	10.036	2.2395	Main stem
18/01/2016 05:22	111.953	2.16069	0	3029.19	LI820	28.1	28.07	0.9959	2900.4	0.03132	403.479	450.798	403.479	10.0409	2.26431	Main stem
18/01/2016 05:23	111.952	2.16282	0	3019.43	LI820	28.13	28.09	0.9959	2889.09	0.03131	403.086	450.363	403.086	10.0458	2.25445	Main stem
18/01/2016 05:24	111.951	2.16487	0	3031.83	LI820	28.2	28.08	0.9959	2891.72	0.03131	403.283	450.581	403.283	10.0434	2.25628	Main stem
18/01/2016 05:25	111.95	2.16691	0	3059.07	LI820	28.18	28.04	0.9959	2915.45	0.03135	404.07	451.452	404.07	10.0336	2.27846	Main stem
18/01/2016 05:26	111.949	2.16892	0	3001.95	LI820	28.09	28	0.9959	2867.06	0.03138	404.859	452.325	404.859	10.0238	2.23458	Main stem
18/01/2016 05:27	111.948	2.17087	0	3011.91	LI820	28.03	27.96	0.9959	2879.08	0.03141	405.649	453.199	405.649	10.014	2.24543	Main stem
18/01/2016 05:28	111.947	2.17289	0	2984.47	LI820	27.98	27.92	0.9959	2855.43	0.03144	406.441	454.075	406.441	10.0043	2.22396	Main stem
18/01/2016 05:29	111.946	2.17502	0	3009.47	LI820	27.94	27.9	0.996	2881.68	0.03146	406.837	454.514	406.837	9.99941	2.24803	Main stem
18/01/2016 05:30	111.945	2.17714	0	2947.28	LI820	27.9	27.9	0.996	2826.63	0.03146	406.837	454.514	406.837	9.99941	2.19816	Main stem
18/01/2016 05:31	111.943	2.17911	0	2934.88	LI820	27.89	27.9	0.996	2816.07	0.03146	406.837	454.514	406.837	9.99941	2.18859	Main stem
18/01/2016 05:32	111.942	2.18095	0	2957.24	LI820	27.9	27.9	0.996	2836.79	0.03146	406.837	454.514	406.837	9.99941	2.20736	Main stem
18/01/2016 05:33	111.94	2.1828	0	2957.24	LI820	27.9	27.9	0.996	2837.03	0.03146	406.837	454.514	406.837	9.99941	2.20758	Main stem
18/01/2016 05:34	111.939	2.18468	0	3009.47	LI820	27.89	27.91	0.996	2888.79	0.03145	406.639	454.295	406.639	10.0018	2.25431	Main stem
18/01/2016 05:35	111.938	2.18647	0	3051.75	LI820	27.89	27.93	0.996	2931.29	0.03144	406.243	453.856	406.243	10.0067	2.2932	Main stem
18/01/2016 05:36	111.936	2.18825	0	3111.3	LI820	27.91	27.95	0.996	2989.38	0.03142	405.847	453.418	405.847	10.0116	2.34548	Main stem
18/01/2016 05:37	111.935	2.18985	0	3151.14	LI820	27.92	27.97	0.996	3027.77	0.03141	405.451	452.98	405.451	10.0165	2.38067	Main stem
18/01/2016 05:38	111.933	2.19117	0	3168.62	LI820	27.95	27.99	0.996	3043.71	0.03139	405.056	452.543	405.056	10.0214	2.39475	Main stem
18/01/2016 05:39	111.931	2.19236	0	3153.58	LI820	28	28	0.9959	3023.52	0.03138	404.859	452.325	404.859	10.0238	2.37632	Main stem
18/01/2016 05:40	111.929	2.1936	0	3133.66	LI820	28.02	28	0.9959	3001.43	0.03138	404.859	452.325	404.859	10.0238	2.35631	Main stem
18/01/2016 05:41	111.928	2.19509	0	3161.1	LI820	28.01	28	0.9959	3029.5	0.03138	404.859	452.325	404.859	10.0238	2.38174	Main stem
18/01/2016 05:42	111.926	2.19637	0	3200.94	LI820	27.99	28	0.9959	3069.99	0.03138	404.859	452.325	404.859	10.0238	2.41842	Main stem
18/01/2016 05:43	111.924	2.19778	0	3210.9	LI820	27.99	28	0.9959	3079.66	0.03138	404.859	452.325	404.859	10.0238	2.42718	Main stem
18/01/2016 05:44	111.922	2.19939	0	3238.14	LI820	28	28	0.9959	3103.88	0.03138	404.859	452.325	404.859	10.0238	2.44912	Main stem
18/01/2016 05:45	111.921	2.2008	0	3245.66	LI820	28	28	0.9958	3111.94	0.03138	404.859	452.325	404.859	10.0238	2.45645	Main stem
18/01/2016 05:46	111.919	2.20221	0	3273.1	LI820	27.99	28	0.9958	3139.44	0.03138	404.859	452.325	404.859	10.0238	2.48137	Main stem
18/01/2016 05:47	111.917	2.20366	0	3273.1	LI820	27.99	28	0.9958	3138.84	0.03138	404.859	452.325	404.859	10.0238	2.48082	Main stem
18/01/2016 05:48	111.916	2.20513	0	3273.1	LI820	27.99	28	0.9958	3139.17	0.03138	404.859	452.325	404.859	10.0238	2.48112	Main stem
18/01/2016 05:49	111.914	2.20669	0	3273.1	LI820	28	28.01	0.9958	3138.9	0.03137	404.661	452.106	404.661	10.0263	2.48069	Main stem
18/01/2016 05:50	111.912	2.20823	0	3268.02	LI820	28.05	28.02	0.9958	3128.74	0.03136	404.464	451.888	404.464	10.0287	2.4713	Main stem
18/01/2016 05:51	111.911	2.20984	0	3275.54	LI820	28.09	28.04	0.9958	3133.08	0.03135	404.07	451.452	404.07	10.0336	2.47565	Main stem
18/01/2016 05:52	111.909	2.21156	0	3310.29	LI820	28.09	28.06	0.9958	3168.41	0.03133	403.676	451.016	403.676	10.0385	2.50728	Main stem
18/01/2016 05:53	111.908	2.21332	0	3332.65	LI820	28.08	28.08	0.9958	3193.82	0.03132	403.283	450.581	403.283	10.0434	2.53072	Main stem
18/01/2016 05:54	111.907	2.21503	0	3310.29	LI820	28.09	28.1	0.9958	3173.15	0.0313	402.89	450.146	402.89	10.0483	2.51162	Main stem
18/01/2016 05:55	111.905	2.21665	0	3255.62	LI820	28.09	28.09	0.9958	3119.32	0.03131	403.086	450.363	403.086	10.0458	2.46304	Main stem
18/01/2016 05:56	111.904	2.21814	0	3273.1	LI820	28.09	28.07	0.9956	3132.92	0.03133	403.479	450.798	403.479	10.0409	2.47581	Main stem
18/01/2016 05:57	111.902	2.21964	0	3280.41	LI820	28.09	28.05	0.9956	3136.77	0.03134	403.873	451.234	403.873	10.036	2.47888	Main stem
18/01/2016 05:58	111.9	2.22099	0	3300.33	LI820	28.08	28.03	0.9956	3154.78	0.03136	404.267	451.67	404.267	10.0311	2.49557	Main stem
18/01/2016 05:59	111.899	2.22218	0	3320.25	LI820	28.07	28.01	0.9956	3172.34	0.03138	404.661	452.106	404.661	10.0263	2.51186	Main stem
18/01/2016 06:00	111.897	2.22346	0	3337.73	LI820	28.06	28.01	0.9956	3192.4	0.03137	404.661	452.106	404.661	10.0263	2.52923	Main stem
18/01/2016 06:01	111.895	2.22484	0	3364.97	LI820	28.06	28.03	0.9956	3221.66	0.03135	404.267	451.67	404.267	10.0311	2.55535	Main stem
18/01/2016 06:02	111.894	2.2263	0	3372.49	LI820	28.06	28.05	0.9956	3231.13	0.03134	403.873	451.234	403.873	10.036	2.56436	Main stem
18/01/2016 06:03	111.892	2.22772	0	3397.29	LI820	28.05	28.07	0.9956	3258.78	0.03132	403.479	450.798	403.479	10.0409	2.58901	Main stem
18/01/2016 06:04	111.89	2.22894	0	3404.81	LI820	28.03	28.09	0.9956	3272.24	0.0313	403.086	450.363	403.086	10.0458	2.60081	Main stem
18/01/2016 06:05	111.888	2.23015	0	3389.97	LI820	28.05	28.09	0.9956	3252.48	0.03131	403.086	450.363	403.086	10.0458	2.58374	Main stem
18/01/2016 06:06	111.886	2.23123	0	3337.73	LI820	28.11	28.07	0.9956	3192.37	0.03133	403.479	450.798	403.479	10.0409	2.52967	Main stem
18/01/2016 06:07	111.884	2.23207	0	3337.73	LI820	28.11	28.05	0.9956	3189.55	0.03134	403.873	451.234	403.873	10.036	2.52669	Main stem
18/01/2016 06:08	111.882	2.23273	0	3345.05	LI820	28.09	28.02	0.9956	3196.28	0.03136	404.464	451.888	404.464	10.0287	2.53255	Main stem
18/01/2016 06:09	111.88	2.23315	0	3340.17	LI820	28.06	28	0.9956	3194.01	0.03138	404.859	452.325	404.859	10.0238	2.53087	Main stem
18/01/2016 06:10	111.878	2.23352	0	3317.81	LI820	28.04	28.03	0.9956	3178.34	0.03136	404.267	451.67	404.267	10.0311	2.51691	Main stem
18/01/2016 06:11	111.876	2.23382	0	3322.69	LI820	28.05	28.07	0.9955	3186.27	0.03132	403.479	450.798	403.479	10.0409	2.52337	Main stem
18/01/2016 06:12	111.874	2.23412	0	3342.61	LI820	28.05	28.11	0.9955	3211.4	0.03129	402.693	449.929	402.693	10.0507	2.54618	Main stem
18/01/2016 06:13	111.871	2.23441	0	3352.57	LI820	28.03	28.15	0.9955	3228.24	0.03126	401.909	449.061	401.909	10.0605	2.56147	Main stem
18/01/2016 06:14	111.869	2.23443	0	3295.45	LI820	28.03	28.19	0.9955	3179.41	0.03123	401.126	448.194	401.126	10.0703	2.51728	Main stem
18/01/2016 06:15	111.867	2.23455	0	3260.49	LI820	28.04	28.19	0.9953	3142.48	0.03123	401.126	448.194	401.126	10.0703	2.4839	Main stem
18/01/2016 06:16	111.864	2.23458	0	3275.54	LI820	28.12	28.16	0.9953	3143.17	0.03125	401.713	448.844	401.713	10.063	2.4843	Main stem
18/01/2016 06:17	111.862	2.23491	0	3260.49	LI820	28.16	28.15	0.9953	3120.42	0.03126	401.909	449.061	401.909	10.0605	2.46389	Main stem
18/01/2016 06:18	111.86	2.23526	0	3230.82	LI820	28.12	28.13	0.9953	3095.36	0.03128	402.301	449.494	402.301	10.0556	2.44156	Main stem
18/01/2016 06:19	111.858	2.23556	0	3205.82	LI820	28.12	28.1	0.9953	3068.19	0.0313	402.89	450.146	402.89	10.0483	2.41673	Main stem
18/01/2016 06:20	111.855	2.2356	0	3198.3	LI820	28.12	28.09	0.9953	3058.31	0.03131	403.086	450.363	403.086	10.0458	2.40796	Main stem
18/01/2016 06:21	111.853	2.23565	0	3198.3	LI820	28.12	28.07	0.9953	3056.25	0.03133	403.479	450.798	403.479	10.0409	2.40646	Main stem
18/01/2016 06:22	111.851	2.23578	0	3223.3	LI820	28.13	28.05	0.9953	3076.38	0.03134	403.873	451.234	403.873	10.036	2.42429	Main stem
18/01/2016 06:23	111.849	2.23614	0	3248.1	LI820	28.11	28.03	0.9953	3100.2	0.03136	404.267	451.67	404.267	10.0311	2.44623	Main stem
18/01/2016 06:24	111.846	2.23655	0	3280.41	LI820	28.12	28	0.9953	3126.51	0.03138	404.859	452.325	404.859	10.0238	2.46984	Main stem
18/01/2016 06:25	111.844	2.2371	0	3300.33	LI820	28.11	28	0.9952	3145.96	0.03138	404.859	452.325	404.859	10.0238	2.48749	Main stem
18/01/2016 06:26	111.842	2.23774	0	3330.21	LI820	28.11	28	0.9952	3175.13	0.03138	404.859	452.325	404.859	10.0238	2.51392	Main stem
18/01/2016 06:27	111.84	2.23849	0	3380.01	LI820	28.06	28	0.9952	3229.24	0.03138	404.859	452.325	404.859	10.0238	2.56293	Main stem
18/01/2016 06:28	111.838	2.23939	0	3427.17	LI820	28.03	28	0.9952	3278.77	0.03138	404.859	452.325	404.859	10.0238	2.6078	Main stem
18/01/2016 06:29	111.836	2.24046	0	3464.56	LI820	28.03	28	0.9952	3314.65	0.03138	404.859	452.325	404.859	10.0238	2.64031	Main stem
18/01/2016 06:30	111.834	2.24186	0	3486.92	LI820	28.05	28.03	0.9952	3338	0.03136	404.267	451.67	404.267	10.0311	2.66171	Main stem
18/01/2016 06:31	111.833	2.2437	0	3461.92	LI820	28.04	28.07	0.9952	3320.62	0.03132	403.479	450.798	403.479	10.0409	2.64517	Main stem
18/01/2016 06:32	111.833	2.24568	0	3417.21	LI820	28.02	28.11	0.9952	3285.46	0.03129	402.693	449.929	402.693	10.0507	2.61336	Main stem
18/01/2016 06:33	111.833	2.24774	0	3454.6	LI820	28.04	28.15	0.9952	3325.14	0.03126	401.909	449.061	401.909	10.0605	2.64935	Main stem
18/01/2016 06:34	111.834	2.24984	0	3437.12	LI820	28.08	28.19	0.995	3306.11	0.03123	401.126	448.194	401.126	10.0703	2.63222	Main stem
18/01/2016 06:35	111.834	2.25195	0	3384.89	LI820	28.15	28.18	0.995	3243.97	0.03123	401.322	448.411	401.322	10.0679	2.57531	Main stem
18/01/2016 06:36	111.835	2.25402	0	3377.37	LI820	28.21	28.16	0.995	3225.59	0.03126	401.713	448.844	401.713	10.063	2.55988	Main stem
18/01/2016 06:37	111.836	2.25611	0	3394.85	LI820	28.2	28.13	0.995	3240.33	0.03128	402.301	449.494	402.301	10.0556	2.57299	Main stem
18/01/2016 06:38	111.836	2.25823	0	3372.49	LI820	28.18	28.1	0.995	3217.91	0.0313	402.89	450.146	402.89	10.0483	2.55245	Main stem
18/01/2016 06:39	111.837	2.26035	0	3414.77	LI820	28.12	28.08	0.9949	3263.66	0.03132	403.283	450.581	403.283	10.0434	2.59432	Main stem
18/01/2016 06:40	111.837	2.26257	0	3367.41	LI820	28.11	28.05	0.9949	3215.56	0.03134	403.873	451.234	403.873	10.036	2.55051	Main stem
18/01/2016 06:41	111.837	2.2648	0	3372.49	LI820	28.08	28.03	0.9949	3222.35	0.03136	404.267	451.67	404.267	10.0311	2.55704	Main stem
18/01/2016 06:42	111.837	2.26707	0	3387.33	LI820	28.05	28	0.9949	3236.3	0.03138	404.859	452.325	404.859	10.0238	2.56944	Main stem
18/01/2016 06:43	111.837	2.26935	0	3392.41	LI820	28.11	28	0.9949	3232.13	0.03138	404.859	452.325	404.859	10.0238	2.56566	Main stem
18/01/2016 06:44	111.837	2.27165	0	3427.17	LI820	28.14	28	0.9949	3260.33	0.03138	404.859	452.325	404.859	10.0238	2.59121	Main stem
18/01/2016 06:45	111.837	2.27388	0	3474.52	LI820	28.16	28	0.9949	3303.51	0.03138	404.859	452.325	404.859	10.0238	2.63032	Main stem
18/01/2016 06:46	111.836	2.27607	0	3516.8	LI820	28.16	28	0.9949	3343.24	0.03138	404.859	452.325	404.859	10.0238	2.66632	Main stem
18/01/2016 06:47	111.835	2.278	0	3546.48	LI820	28.14	28	0.9947	3374.02	0.03138	404.859	452.325	404.859	10.0238	2.69427	Main stem
18/01/2016 06:48	111.834	2.27919	0	3559.08	LI820	28.14	28.02	0.9947	3388.32	0.03136	404.464	451.888	404.464	10.0287	2.70682	Main stem
18/01/2016 06:49	111.834	2.27928	0	3578.79	LI820	28.17	28.04	0.9946	3405.57	0.03135	404.07	451.452	404.07	10.0336	2.72294	Main stem
18/01/2016 06:50	111.834	2.27938	0	3531.64	LI820	28.17	28.06	0.9946	3362.95	0.03133	403.676	451.016	403.676	10.0385	2.68393	Main stem
18/01/2016 06:51	111.834	2.27986	0	3531.64	LI820	28.18	28.08	0.9946	3365.19	0.03132	403.283	450.581	403.283	10.0434	2.68641	Main stem
18/01/2016 06:52	111.832	2.28155	0	3526.56	LI820	28.16	28.1	0.9946	3365.33	0.0313	402.89	450.146	402.89	10.0483	2.68613	Main stem
18/01/2016 06:53	111.83	2.28292	0	3568.83	LI820	28.14	28.12	0.9946	3412.66	0.03128	402.497	449.711	402.497	10.0532	2.72858	Main stem
18/01/2016 06:54	111.828	2.28419	0	3578.79	LI820	28.13	28.14	0.9946	3425.9	0.03127	402.105	449.277	402.105	10.0581	2.74103	Main stem
18/01/2016 06:55	111.826	2.28532	0	3578.79	LI820	28.23	28.16	0.9946	3413.3	0.03125	401.713	448.844	401.713	10.063	2.72921	Main stem
18/01/2016 06:56	111.824	2.28595	0	3578.79	LI820	28.26	28.18	0.9946	3412.68	0.03124	401.322	448.411	401.322	10.0679	2.7291	Main stem
18/01/2016 06:57	111.822	2.28635	0	3591.4	LI820	28.27	28.2	0.9945	3424.93	0.03122	400.931	447.978	400.931	10.0728	2.73982	Main stem
18/01/2016 06:58	111.82	2.2867	0	3606.23	LI820	28.29	28.16	0.9945	3430.65	0.03125	401.713	448.844	401.713	10.063	2.74496	Main stem
18/01/2016 06:59	111.817	2.28674	0	3631.03	LI820	28.32	28.12	0.9945	3444.84	0.03128	402.497	449.711	402.497	10.0532	2.75776	Main stem
18/01/2016 07:00	111.815	2.28644	0	3660.91	LI820	28.28	28.08	0.9945	3473.64	0.03131	403.283	450.581	403.283	10.0434	2.7838	Main stem
18/01/2016 07:01	111.814	2.28594	0	3700.75	LI820	28.23	28.04	0.9945	3513.48	0.03135	404.07	451.452	404.07	10.0336	2.82073	Main stem
18/01/2016 07:02	111.813	2.28583	0	3725.55	LI820	28.11	28	0.9945	3549.76	0.03138	404.859	452.325	404.859	10.0238	2.85355	Main stem
18/01/2016 07:03	111.813	2.28607	0	3735.51	LI820	28.1	28	0.9945	3559.94	0.03138	404.859	452.325	404.859	10.0238	2.86277	Main stem
18/01/2016 07:04	111.813	2.28609	0	3757.86	LI820	28.1	28	0.9945	3580.6	0.03138	404.859	452.325	404.859	10.0238	2.88148	Main stem
18/01/2016 07:05	111.813	2.28609	0	3757.86	LI820	28.09	28	0.9945	3582.92	0.03138	404.859	452.325	404.859	10.0238	2.88359	Main stem
18/01/2016 07:06	111.813	2.28612	0	3733.07	LI820	28.08	28	0.9945	3560	0.03138	404.859	452.325	404.859	10.0238	2.86282	Main stem
18/01/2016 07:07	111.813	2.28612	0	3720.67	LI820	28.1	28	0.9945	3545.04	0.03138	404.859	452.325	404.859	10.0238	2.84927	Main stem
18/01/2016 07:08	111.813	2.28608	0	3710.71	LI820	28.13	28	0.9945	3531.56	0.03138	404.859	452.325	404.859	10.0238	2.83706	Main stem
18/01/2016 07:09	111.813	2.28611	0	3755.42	LI820	28.08	28	0.9945	3582.38	0.03138	404.859	452.325	404.859	10.0238	2.8831	Main stem
18/01/2016 07:10	111.813	2.28607	0	3800.14	LI820	28.07	28	0.9945	3627.02	0.03138	404.859	452.325	404.859	10.0238	2.92354	Main stem
18/01/2016 07:11	111.813	2.28615	0	3820.06	LI820	28.05	28	0.9945	3647.96	0.03138	404.859	452.325	404.859	10.0238	2.94251	Main stem
18/01/2016 07:12	111.813	2.28613	0	3862.34	LI820	28.06	28	0.9945	3686.98	0.03138	404.859	452.325	404.859	10.0238	2.97785	Main stem
18/01/2016 07:13	111.813	2.28613	0	3867.42	LI820	28.06	28	0.9945	3691.95	0.03138	404.859	452.325	404.859	10.0238	2.98236	Main stem
18/01/2016 07:14	111.813	2.28609	0	3867.42	LI820	28.05	28	0.9945	3693.96	0.03138	404.859	452.325	404.859	10.0238	2.98418	Main stem
18/01/2016 07:15	111.813	2.28612	0	3867.42	LI820	28.05	28	0.9945	3694.69	0.03138	404.859	452.325	404.859	10.0238	2.98484	Main stem
18/01/2016 07:16	111.813	2.2861	0	3807.66	LI820	28.04	28	0.9945	3638.25	0.03138	404.859	452.325	404.859	10.0238	2.93371	Main stem
18/01/2016 07:17	111.813	2.2861	0	3740.59	LI820	28.04	28	0.9945	3574.54	0.03138	404.859	452.325	404.859	10.0238	2.876	Main stem
18/01/2016 07:18	111.813	2.28586	0	3675.95	LI820	28.03	28	0.9945	3513.44	0.03138	404.859	452.325	404.859	10.0238	2.82064	Main stem
18/01/2016 07:19	111.814	2.28546	0	3626.15	LI820	28.03	28	0.9945	3466.45	0.03138	404.859	452.325	404.859	10.0238	2.77808	Main stem
18/01/2016 07:20	111.816	2.28598	0	3608.67	LI820	28.01	28	0.9945	3452.29	0.03138	404.859	452.325	404.859	10.0238	2.76525	Main stem
18/01/2016 07:21	111.817	2.28671	0	3623.71	LI820	27.99	28	0.9945	3471.1	0.03138	404.859	452.325	404.859	10.0238	2.78229	Main stem
18/01/2016 07:22	111.819	2.28662	0	3596.27	LI820	28	28	0.9945	3442.96	0.03138	404.859	452.325	404.859	10.0238	2.7568	Main stem
18/01/2016 07:23	111.82	2.28612	0	3539.16	LI820	28.06	28	0.9945	3378.71	0.03138	404.859	452.325	404.859	10.0238	2.69859	Main stem
18/01/2016 07:24	111.822	2.28602	0	3476.96	LI820	28.07	28	0.9943	3317.43	0.03138	404.859	452.325	404.859	10.0238	2.64315	Main stem
18/01/2016 07:25	111.823	2.28614	0	3437.12	LI820	28.08	28	0.9943	3277.7	0.03138	404.859	452.325	404.859	10.0238	2.60716	Main stem
18/01/2016 07:26	111.825	2.28626	0	3377.37	LI820	28.03	28	0.9943	3227.65	0.03138	404.859	452.325	404.859	10.0238	2.56182	Main stem
18/01/2016 23:51	111.809	2.26105	0	3404.81	LI820	27.37	27.5	0.9974	3292.01	0.03179	414.85	463.38	414.85	9.90237	2.62107	Main stem
18/01/2016 23:52	111.81	2.25877	0	3447.08	LI820	27.41	27.5	0.9974	3327.77	0.03179	414.85	463.38	414.85	9.90237	2.65349	Main stem
18/01/2016 23:53	111.811	2.25649	0	3447.08	LI820	27.41	27.5	0.9976	3327.84	0.03179	414.85	463.38	414.85	9.90237	2.65348	Main stem
18/01/2016 23:54	111.813	2.25421	0	3399.93	LI820	27.43	27.5	0.9976	3279.54	0.03179	414.85	463.38	414.85	9.90237	2.60969	Main stem
18/01/2016 23:55	111.814	2.25194	0	3399.93	LI820	27.44	27.5	0.9976	3277.85	0.03179	414.85	463.38	414.85	9.90237	2.60816	Main stem
18/01/2016 23:56	111.815	2.2495	0	3419.64	LI820	27.45	27.5	0.9976	3294.98	0.03179	414.85	463.38	414.85	9.90237	2.62369	Main stem
18/01/2016 23:57	111.816	2.24686	0	3382.45	LI820	27.46	27.5	0.9976	3258.06	0.03179	414.85	463.38	414.85	9.90237	2.59022	Main stem
18/01/2016 23:58	111.816	2.24412	0	3382.45	LI820	27.47	27.5	0.9976	3257	0.03179	414.85	463.38	414.85	9.90237	2.58926	Main stem
18/01/2016 23:59	111.816	2.24154	0	3424.73	LI820	27.47	27.52	0.9977	3300.12	0.03177	414.446	462.932	414.446	9.9072	2.62794	Main stem
19/01/2016 00:00	111.816	2.23895	0	3382.45	LI820	27.49	27.54	0.9977	3260.56	0.03176	414.042	462.485	414.042	9.91203	2.59253	Main stem
19/01/2016 00:01	111.815	2.23634	0	3340.17	LI820	27.49	27.56	0.9977	3221.3	0.03174	413.638	462.039	413.638	9.91687	2.55657	Main stem
19/01/2016 00:02	111.813	2.23399	0	3317.81	LI820	27.51	27.58	0.9977	3200.44	0.03172	413.235	461.593	413.235	9.9217	2.5373	Main stem
19/01/2016 00:03	111.811	2.23184	0	3295.45	LI820	27.52	27.6	0.9977	3179.53	0.03171	412.832	461.147	412.832	9.92654	2.51878	Main stem
19/01/2016 00:04	111.809	2.22993	0	3332.65	LI820	27.54	27.61	0.9977	3214.19	0.0317	412.631	460.924	412.631	9.92896	2.55002	Main stem
19/01/2016 00:05	111.807	2.22878	0	3332.65	LI820	27.56	27.63	0.9979	3213.62	0.03169	412.229	460.479	412.229	9.93381	2.54987	Main stem
19/01/2016 00:06	111.804	2.22864	0	3340.17	LI820	27.57	27.64	0.9979	3221.57	0.03167	412.028	460.257	412.028	9.93623	2.55608	Main stem
19/01/2016 00:07	111.802	2.22924	0	3292.81	LI820	27.6	27.65	0.9979	3173.38	0.03166	411.827	460.035	411.827	9.93865	2.51223	Main stem
19/01/2016 00:08	111.8	2.22984	0	3282.85	LI820	27.59	27.66	0.9979	3166.95	0.03165	411.626	459.812	411.626	9.94108	2.50622	Main stem
19/01/2016 00:09	111.797	2.23045	0	3292.81	LI820	27.6	27.68	0.9979	3175.64	0.03164	411.225	459.369	411.225	9.94592	2.51453	Main stem
19/01/2016 00:10	111.795	2.23171	0	3265.58	LI820	27.6	27.69	0.9979	3151.56	0.03163	411.024	459.147	411.024	9.94835	2.49252	Main stem
19/01/2016 00:11	111.793	2.23378	0	3265.58	LI820	27.61	27.7	0.9979	3152.2	0.03162	410.824	458.925	410.824	9.95077	2.49292	Main stem
19/01/2016 00:12	111.792	2.23612	0	3275.54	LI820	27.62	27.7	0.9979	3160.42	0.03162	410.824	458.925	410.824	9.95077	2.50037	Main stem
19/01/2016 00:13	111.79	2.23871	0	3345.05	LI820	27.62	27.7	0.9979	3227.57	0.03162	410.824	458.925	410.824	9.95077	2.56122	Main stem
19/01/2016 00:14	111.789	2.24147	0	3340.17	LI820	27.62	27.7	0.9979	3222.4	0.03162	410.824	458.925	410.824	9.95077	2.55654	Main stem
19/01/2016 00:15	111.789	2.24435	0	3258.06	LI820	27.63	27.7	0.9979	3141.65	0.03162	410.824	458.925	410.824	9.95077	2.48336	Main stem
19/01/2016 00:16	111.789	2.24738	0	3238.14	LI820	27.64	27.7	0.9979	3121.45	0.03162	410.824	458.925	410.824	9.95077	2.46506	Main stem
19/01/2016 00:17	111.789	2.25033	0	3275.54	LI820	27.62	27.72	0.998	3162.81	0.03161	410.424	458.482	410.424	9.95563	2.50293	Main stem
19/01/2016 00:18	111.788	2.25324	0	3240.58	LI820	27.63	27.74	0.998	3130.2	0.03159	410.024	458.039	410.024	9.96048	2.47301	Main stem
19/01/2016 00:19	111.787	2.25517	0	3240.58	LI820	27.67	27.76	0.998	3128.32	0.03157	409.624	457.597	409.624	9.96534	2.47095	Main stem
19/01/2016 00:20	111.785	2.25619	0	3305.41	LI820	27.71	27.78	0.998	3187.76	0.03156	409.225	457.155	409.225	9.9702	2.52524	Main stem
19/01/2016 00:21	111.783	2.25539	0	3285.5	LI820	27.72	27.8	0.9981	3170.1	0.03154	408.826	456.714	408.826	9.97506	2.50883	Main stem
19/01/2016 00:22	111.781	2.25458	0	3360.09	LI820	27.74	27.8	0.9981	3238.52	0.03154	408.826	456.714	408.826	9.97506	2.57083	Main stem
19/01/2016 00:23	111.779	2.25377	0	3322.69	LI820	27.74	27.8	0.9981	3203.18	0.03154	408.826	456.714	408.826	9.97506	2.5388	Main stem
19/01/2016 00:24	111.777	2.25265	0	3389.97	LI820	27.73	27.8	0.9981	3268.22	0.03154	408.826	456.714	408.826	9.97506	2.59774	Main stem
19/01/2016 00:25	111.775	2.25069	0	3380.01	LI820	27.76	27.8	0.9981	3254.43	0.03154	408.826	456.714	408.826	9.97506	2.58524	Main stem
19/01/2016 00:26	111.773	2.24891	0	3337.73	LI820	27.76	27.8	0.9981	3214.5	0.03154	408.826	456.714	408.826	9.97506	2.54906	Main stem
19/01/2016 00:27	111.771	2.24712	0	3330.21	LI820	27.76	27.8	0.9981	3207.29	0.03154	408.826	456.714	408.826	9.97506	2.54253	Main stem
19/01/2016 00:28	111.768	2.24571	0	3342.61	LI820	27.77	27.8	0.9981	3217.62	0.03154	408.826	456.714	408.826	9.97506	2.55189	Main stem
19/01/2016 00:29	111.766	2.24466	0	3342.61	LI820	27.77	27.8	0.9981	3217.1	0.03154	408.826	456.714	408.826	9.97506	2.55142	Main stem
19/01/2016 00:30	111.763	2.24418	0	3317.81	LI820	27.79	27.8	0.9981	3190.27	0.03154	408.826	456.714	408.826	9.97506	2.52711	Main stem
19/01/2016 00:31	111.76	2.24467	0	3372.49	LI820	27.78	27.8	0.9981	3245.49	0.03154	408.826	456.714	408.826	9.97506	2.57714	Main stem
19/01/2016 00:32	111.758	2.24682	0	3372.49	LI820	27.79	27.82	0.9983	3247.13	0.03152	408.427	456.273	408.427	9.97993	2.57818	Main stem
19/01/2016 00:33	111.757	2.24903	0	3377.37	LI820	27.8	27.84	0.9983	3253.09	0.03151	408.029	455.833	408.029	9.9848	2.58402	Main stem
19/01/2016 00:34	111.756	2.25123	0	3377.37	LI820	27.82	27.86	0.9983	3252.36	0.03149	407.632	455.393	407.632	9.98966	2.58297	Main stem
19/01/2016 00:35	111.754	2.25344	0	3352.57	LI820	27.82	27.88	0.9983	3231.58	0.03147	407.234	454.953	407.234	9.99454	2.56377	Main stem
19/01/2016 00:36	111.753	2.25564	0	3392.41	LI820	27.85	27.9	0.9983	3268.52	0.03146	406.837	454.514	406.837	9.99941	2.59767	Main stem
19/01/2016 00:37	111.751	2.25785	0	3429.6	LI820	27.86	27.9	0.9983	3302.72	0.03146	406.837	454.514	406.837	9.99941	2.62866	Main stem
19/01/2016 00:38	111.75	2.26006	0	3434.69	LI820	27.87	27.9	0.9983	3306.04	0.03146	406.837	454.514	406.837	9.99941	2.63166	Main stem
19/01/2016 00:39	111.749	2.26283	0	3439.56	LI820	27.89	27.9	0.9983	3307.58	0.03146	406.837	454.514	406.837	9.99941	2.63306	Main stem
19/01/2016 00:40	111.748	2.26559	0	3457.04	LI820	27.86	27.9	0.9983	3327.36	0.03146	406.837	454.514	406.837	9.99941	2.65098	Main stem
19/01/2016 00:41	111.747	2.26817	0	3474.52	LI820	27.89	27.9	0.9983	3341.64	0.03146	406.837	454.514	406.837	9.99941	2.66392	Main stem
19/01/2016 00:42	111.745	2.27072	0	3474.52	LI820	27.91	27.92	0.9984	3341.68	0.03144	406.441	454.075	406.441	10.0043	2.66352	Main stem
19/01/2016 00:43	111.744	2.27304	0	3501.76	LI820	27.95	27.94	0.9984	3364.93	0.03143	406.045	453.637	406.045	10.0092	2.68504	Main stem
19/01/2016 00:44	111.742	2.27502	0	3501.76	LI820	27.95	27.96	0.9984	3368.05	0.03141	405.649	453.199	405.649	10.014	2.68746	Main stem
19/01/2016 00:45	111.739	2.27643	0	3481.84	LI820	27.92	27.98	0.9984	3356.3	0.03139	405.254	452.762	405.254	10.0189	2.67642	Main stem
19/01/2016 00:46	111.737	2.27657	0	3459.48	LI820	27.94	28	0.9984	3333.13	0.03138	404.859	452.325	404.859	10.0238	2.65588	Main stem
19/01/2016 00:47	111.734	2.27608	0	3439.56	LI820	27.95	28	0.9984	3312.36	0.03138	404.859	452.325	404.859	10.0238	2.63707	Main stem
19/01/2016 00:48	111.731	2.27598	0	3454.6	LI820	27.97	28	0.9986	3324.32	0.03138	404.859	452.325	404.859	10.0238	2.64783	Main stem
19/01/2016 00:49	111.728	2.27622	0	3479.4	LI820	27.97	28	0.9986	3349.25	0.03138	404.859	452.325	404.859	10.0238	2.67041	Main stem
19/01/2016 00:50	111.726	2.27666	0	3479.4	LI820	27.98	28	0.9986	3347.09	0.03138	404.859	452.325	404.859	10.0238	2.66846	Main stem
19/01/2016 00:51	111.723	2.27722	0	3479.4	LI820	27.96	28	0.9986	3349.55	0.03138	404.859	452.325	404.859	10.0238	2.67068	Main stem
19/01/2016 00:52	111.72	2.27812	0	3479.4	LI820	27.95	28	0.9986	3350.94	0.03138	404.859	452.325	404.859	10.0238	2.67194	Main stem
19/01/2016 00:53	111.717	2.27937	0	3434.69	LI820	27.97	28	0.9986	3304.88	0.03138	404.859	452.325	404.859	10.0238	2.63022	Main stem
19/01/2016 00:54	111.715	2.28061	0	3419.64	LI820	27.99	28	0.9986	3288.26	0.03138	404.859	452.325	404.859	10.0238	2.61516	Main stem
19/01/2016 00:55	111.712	2.28168	0	3447.08	LI820	28	28	0.9986	3312.08	0.03138	404.859	452.325	404.859	10.0238	2.63674	Main stem
19/01/2016 00:56	111.712	2.2823	0	3389.97	LI820	28.02	28	0.9987	3254.26	0.03138	404.859	452.325	404.859	10.0238	2.58433	Main stem
19/01/2016 00:57	111.711	2.28279	0	3427.17	LI820	27.99	28	0.9987	3295.91	0.03138	404.859	452.325	404.859	10.0238	2.62206	Main stem
19/01/2016 00:58	111.71	2.28318	0	3457.04	LI820	28.04	28	0.9987	3316.88	0.03138	404.859	452.325	404.859	10.0238	2.64105	Main stem
19/01/2016 00:59	111.709	2.2837	0	3474.52	LI820	28.01	28	0.9987	3338.33	0.03138	404.859	452.325	404.859	10.0238	2.66048	Main stem
19/01/2016 01:00	111.708	2.28408	0	3481.84	LI820	28.02	28	0.9987	3344.02	0.03138	404.859	452.325	404.859	10.0238	2.66564	Main stem
19/01/2016 01:01	111.707	2.28445	0	3511.72	LI820	28.03	28	0.9987	3371	0.03138	404.859	452.325	404.859	10.0238	2.69008	Main stem
19/01/2016 01:02	111.707	2.28487	0	3511.72	LI820	28.02	28	0.9987	3372.64	0.03138	404.859	452.325	404.859	10.0238	2.69157	Main stem
19/01/2016 01:03	111.706	2.28532	0	3534.08	LI820	28.03	28	0.9987	3394.05	0.03138	404.859	452.325	404.859	10.0238	2.71096	Main stem
19/01/2016 01:04	111.705	2.28571	0	3544.04	LI820	28.05	28	0.9987	3400.21	0.03138	404.859	452.325	404.859	10.0238	2.71654	Main stem
19/01/2016 01:05	111.704	2.2862	0	3529.2	LI820	28.04	28	0.9987	3388.62	0.03138	404.859	452.325	404.859	10.0238	2.70604	Main stem
19/01/2016 01:06	111.703	2.28664	0	3521.68	LI820	27.98	28	0.9987	3388.82	0.03138	404.859	452.325	404.859	10.0238	2.70622	Main stem
19/01/2016 01:07	111.702	2.28699	0	3544.04	LI820	28.02	28	0.9987	3405.58	0.03138	404.859	452.325	404.859	10.0238	2.72141	Main stem
19/01/2016 01:08	111.701	2.28742	0	3618.63	LI820	28.08	28	0.9987	3468.02	0.03138	404.859	452.325	404.859	10.0238	2.77797	Main stem
19/01/2016 01:09	111.7	2.2878	0	3700.75	LI820	28.04	28	0.9987	3552.2	0.03138	404.859	452.325	404.859	10.0238	2.85423	Main stem
19/01/2016 01:10	111.7	2.28804	0	3743.03	LI820	28.03	28	0.9987	3594.5	0.03138	404.859	452.325	404.859	10.0238	2.89255	Main stem
19/01/2016 01:11	111.699	2.28854	0	3700.75	LI820	28.02	28	0.9987	3555.37	0.03138	404.859	452.325	404.859	10.0238	2.8571	Main stem
19/01/2016 01:12	111.698	2.28887	0	3735.51	LI820	28.03	28	0.9987	3587.13	0.03138	404.859	452.325	404.859	10.0238	2.88587	Main stem
19/01/2016 01:13	111.697	2.28916	0	3730.63	LI820	28.04	28	0.9987	3580.79	0.03138	404.859	452.325	404.859	10.0238	2.88013	Main stem
19/01/2016 01:14	111.696	2.28946	0	3765.38	LI820	28.03	28	0.9987	3616.72	0.03138	404.859	452.325	404.859	10.0238	2.91268	Main stem
19/01/2016 01:15	111.695	2.28969	0	3792.82	LI820	28.02	28	0.9987	3644.06	0.03138	404.859	452.325	404.859	10.0238	2.93744	Main stem
19/01/2016 01:16	111.694	2.28961	0	3849.94	LI820	28.05	28	0.9987	3694.34	0.03138	404.859	452.325	404.859	10.0238	2.98299	Main stem
19/01/2016 01:17	111.692	2.2898	0	3874.74	LI820	28.07	28	0.9987	3711.22	0.03138	404.859	452.325	404.859	10.0238	2.99828	Main stem
19/01/2016 01:18	111.689	2.2901	0	3830.02	LI820	28.1	28	0.9987	3662.66	0.03138	404.859	452.325	404.859	10.0238	2.95429	Main stem
19/01/2016 01:19	111.687	2.2901	0	3877.38	LI820	28.13	28	0.9987	3703.7	0.03138	404.859	452.325	404.859	10.0238	2.99147	Main stem
19/01/2016 01:20	111.684	2.28993	0	3932.05	LI820	28.1	28	0.9987	3761.94	0.03138	404.859	452.325	404.859	10.0238	3.04423	Main stem
19/01/2016 01:21	111.681	2.28966	0	3951.97	LI820	28.14	28	0.9987	3772.77	0.03138	404.859	452.325	404.859	10.0238	3.05404	Main stem
19/01/2016 01:22	111.678	2.2892	0	3956.85	LI820	28.12	28	0.9987	3781.07	0.03138	404.859	452.325	404.859	10.0238	3.06156	Main stem
19/01/2016 01:23	111.675	2.28889	0	3961.93	LI820	28.12	28	0.9987	3784.98	0.03138	404.859	452.325	404.859	10.0238	3.0651	Main stem
19/01/2016 01:24	111.672	2.28896	0	3999.13	LI820	28.17	28	0.9987	3811.87	0.03138	404.859	452.325	404.859	10.0238	3.08946	Main stem
19/01/2016 01:25	111.669	2.29006	0	4023.93	LI820	28.14	28	0.9987	3841.2	0.03138	404.859	452.325	404.859	10.0238	3.11603	Main stem
19/01/2016 01:26	111.668	2.29217	0	4019.05	LI820	28.1	28	0.9987	3844.63	0.03138	404.859	452.325	404.859	10.0238	3.11914	Main stem
19/01/2016 01:27	111.669	2.29416	0	3999.13	LI820	28.08	28	0.9987	3828	0.03138	404.859	452.325	404.859	10.0238	3.10407	Main stem
19/01/2016 01:28	111.671	2.29592	0	3976.77	LI820	28.04	28	0.9987	3814.9	0.03138	404.859	452.325	404.859	10.0238	3.09221	Belawai
19/01/2016 01:29	111.673	2.29787	0	4006.65	LI820	27.99	28	0.9987	3853.12	0.03138	404.859	452.325	404.859	10.0238	3.12683	Belawai
19/01/2016 01:30	111.674	2.30021	0	3969.25	LI820	28.02	28	0.9987	3811	0.03138	404.859	452.325	404.859	10.0238	3.08867	Belawai
19/01/2016 01:31	111.674	2.30277	0	3996.69	LI820	28	28	0.9987	3840.06	0.03138	404.859	452.325	404.859	10.0238	3.115	Belawai
19/01/2016 01:32	111.674	2.30527	0	3979.21	LI820	27.99	28	0.9987	3824.87	0.03138	404.859	452.325	404.859	10.0238	3.10124	Belawai
19/01/2016 01:33	111.674	2.30781	0	4011.53	LI820	28.03	28	0.9987	3847.75	0.03138	404.859	452.325	404.859	10.0238	3.12197	Belawai
19/01/2016 01:34	111.674	2.31036	0	3991.61	LI820	28.04	28	0.9987	3828.24	0.03138	404.859	452.325	404.859	10.0238	3.10429	Belawai
19/01/2016 01:35	111.675	2.31298	0	3929.62	LI820	28.03	28	0.9987	3769.63	0.03138	404.859	452.325	404.859	10.0238	3.0512	Belawai
19/01/2016 01:36	111.675	2.31562	0	3842.42	LI820	28.03	28	0.9987	3686.6	0.03138	404.859	452.325	404.859	10.0238	2.97598	Belawai
19/01/2016 01:37	111.674	2.31829	0	3752.99	LI820	28.06	28	0.9987	3595.62	0.03138	404.859	452.325	404.859	10.0238	2.89356	Belawai
19/01/2016 01:38	111.673	2.32071	0	3792.82	LI820	28.06	28	0.9989	3634.34	0.03138	404.859	452.325	404.859	10.0238	2.92857	Belawai
19/01/2016 01:39	111.671	2.32297	0	3820.06	LI820	28.03	28	0.9989	3666.12	0.03138	404.859	452.325	404.859	10.0238	2.95735	Belawai
19/01/2016 01:40	111.67	2.32509	0	3879.82	LI820	28.03	28	0.9989	3724.06	0.03138	404.859	452.325	404.859	10.0238	3.00984	Belawai
19/01/2016 01:41	111.668	2.32709	0	3924.53	LI820	28.06	28	0.9989	3761.34	0.03138	404.859	452.325	404.859	10.0238	3.04361	Belawai
19/01/2016 01:42	111.666	2.32898	0	3961.93	LI820	28.06	28	0.9989	3795.51	0.03138	404.859	452.325	404.859	10.0238	3.07457	Belawai
19/01/2016 01:43	111.664	2.33077	0	3986.73	LI820	28.02	28	0.9989	3828.65	0.03138	404.859	452.325	404.859	10.0238	3.10459	Belawai
19/01/2016 01:44	111.663	2.33265	0	3991.61	LI820	28.03	28	0.9989	3831.56	0.03138	404.859	452.325	404.859	10.0238	3.10723	Belawai
19/01/2016 01:45	111.662	2.33487	0	3959.29	LI820	28.04	28	0.9989	3799.35	0.03138	404.859	452.325	404.859	10.0238	3.07805	Belawai
19/01/2016 01:46	111.661	2.33728	0	3899.74	LI820	28.02	28	0.9989	3746.12	0.03138	404.859	452.325	404.859	10.0238	3.02983	Belawai
19/01/2016 01:47	111.66	2.33982	0	3852.38	LI820	28.05	28	0.9989	3696.52	0.03138	404.859	452.325	404.859	10.0238	2.98489	Belawai
19/01/2016 01:48	111.659	2.34239	0	3817.62	LI820	28.03	28	0.9989	3665.2	0.03138	404.859	452.325	404.859	10.0238	2.95652	Belawai
19/01/2016 01:49	111.659	2.34484	0	3728.19	LI820	28.06	28	0.9989	3575.22	0.03138	404.859	452.325	404.859	10.0238	2.87501	Belawai
19/01/2016 01:50	111.658	2.34724	0	3710.71	LI820	28.05	28	0.9989	3558.85	0.03138	404.859	452.325	404.859	10.0238	2.86018	Belawai
19/01/2016 01:51	111.656	2.34925	0	3745.46	LI820	28.03	28	0.9989	3596.96	0.03138	404.859	452.325	404.859	10.0238	2.8947	Belawai
19/01/2016 01:52	111.655	2.351	0	3735.51	LI820	28.03	28	0.9989	3588.62	0.03138	404.859	452.325	404.859	10.0238	2.88715	Belawai
19/01/2016 01:53	111.653	2.35273	0	3698.31	LI820	28	28	0.9989	3557.09	0.03138	404.859	452.325	404.859	10.0238	2.85858	Belawai
19/01/2016 01:54	111.652	2.35425	0	3591.4	LI820	28.03	28	0.9989	3448.63	0.03138	404.859	452.325	404.859	10.0238	2.76033	Belawai
19/01/2016 01:55	111.65	2.35554	0	3690.79	LI820	28.03	28	0.9989	3544.64	0.03138	404.859	452.325	404.859	10.0238	2.84731	Belawai
19/01/2016 01:56	111.648	2.35619	0	3790.18	LI820	28.01	28	0.9989	3642.28	0.03138	404.859	452.325	404.859	10.0238	2.93576	Belawai
19/01/2016 01:57	111.645	2.3567	0	3825.14	LI820	28	28	0.9989	3675.87	0.03138	404.859	452.325	404.859	10.0238	2.96619	Belawai
19/01/2016 01:58	111.644	2.35713	0	3924.53	LI820	28.01	28	0.9989	3772.17	0.03138	404.859	452.325	404.859	10.0238	3.05343	Belawai
19/01/2016 01:59	111.643	2.35794	0	3956.85	LI820	27.99	28	0.9989	3806.47	0.03138	404.859	452.325	404.859	10.0238	3.0845	Belawai
19/01/2016 02:00	111.642	2.35862	0	3872.3	LI820	28.02	28	0.9989	3720.53	0.03138	404.859	452.325	404.859	10.0238	3.00664	Belawai
19/01/2016 02:01	111.641	2.35884	0	3892.22	LI820	28.04	28	0.9989	3735.65	0.03138	404.859	452.325	404.859	10.0238	3.02034	Belawai
19/01/2016 02:02	111.641	2.35894	0	3817.62	LI820	28.06	28	0.9989	3656.95	0.03138	404.859	452.325	404.859	10.0238	2.94905	Belawai
19/01/2016 02:03	111.641	2.35897	0	3882.26	LI820	28.05	28	0.9987	3721.4	0.03138	404.859	452.325	404.859	10.0238	3.00751	Belawai
19/01/2016 02:04	111.641	2.35898	0	3961.93	LI820	28.06	28	0.9987	3796.48	0.03138	404.859	452.325	404.859	10.0238	3.07552	Belawai
19/01/2016 02:05	111.641	2.35903	0	4036.53	LI820	28.02	28	0.9987	3876.21	0.03138	404.859	452.325	404.859	10.0238	3.14775	Belawai
19/01/2016 02:06	111.641	2.35907	0	4101.16	LI820	28.03	28	0.9987	3935.71	0.03138	404.859	452.325	404.859	10.0238	3.20165	Belawai
19/01/2016 02:07	111.641	2.35905	0	4150.76	LI820	28.04	28	0.9987	3982.43	0.03138	404.859	452.325	404.859	10.0238	3.24397	Belawai
19/01/2016 02:08	111.641	2.35906	0	4173.32	LI820	28.04	28	0.9987	4004.07	0.03138	404.859	452.325	404.859	10.0238	3.26358	Belawai
19/01/2016 02:09	111.641	2.35907	0	4165.8	LI820	28	28	0.9987	4002.39	0.03138	404.859	452.325	404.859	10.0238	3.26205	Belawai
19/01/2016 02:10	111.642	2.35904	0	4175.76	LI820	28	28	0.9987	4012.54	0.03138	404.859	452.325	404.859	10.0238	3.27125	Belawai
19/01/2016 02:11	111.642	2.359	0	4188.16	LI820	28	28	0.9987	4025.42	0.03138	404.859	452.325	404.859	10.0238	3.28292	Belawai
19/01/2016 02:12	111.642	2.35897	0	4212.96	LI820	27.99	28	0.9987	4049.3	0.03138	404.859	452.325	404.859	10.0238	3.30455	Belawai
19/01/2016 02:13	111.642	2.35899	0	4212.96	LI820	28.04	28	0.9987	4041.37	0.03138	404.859	452.325	404.859	10.0238	3.29737	Belawai
19/01/2016 02:14	111.642	2.35891	0	4185.72	LI820	28.06	28	0.9987	4011.14	0.03138	404.859	452.325	404.859	10.0238	3.26998	Belawai
19/01/2016 02:15	111.641	2.35863	0	4218.04	LI820	28.04	28	0.9987	4044.55	0.03138	404.859	452.325	404.859	10.0238	3.30025	Belawai
19/01/2016 02:16	111.639	2.35909	0	4250.35	LI820	28.06	28	0.9987	4072.59	0.03138	404.859	452.325	404.859	10.0238	3.32565	Belawai
19/01/2016 02:17	111.637	2.35992	0	4277.59	LI820	28.07	28	0.9987	4094.94	0.03138	404.859	452.325	404.859	10.0238	3.34589	Belawai
19/01/2016 02:18	111.635	2.36087	0	4242.83	LI820	28.07	28.01	0.9987	4064.08	0.03137	404.661	452.106	404.661	10.0263	3.31769	Belawai
19/01/2016 02:19	111.633	2.36161	0	4228	LI820	28.07	28.03	0.9987	4053.79	0.03135	404.267	451.67	404.267	10.0311	3.30787	Belawai
19/01/2016 02:20	111.631	2.36188	0	4180.64	LI820	28.08	28.05	0.9987	4010.72	0.03134	403.873	451.234	403.873	10.036	3.26941	Belawai
19/01/2016 02:21	111.629	2.36202	0	4053.81	LI820	28.11	28.07	0.9987	3887.56	0.03132	403.479	450.798	403.479	10.0409	3.15737	Belawai
19/01/2016 02:22	111.627	2.36227	0	4053.81	LI820	28.12	28.09	0.9987	3888.41	0.0313	403.086	450.363	403.086	10.0458	3.15767	Belawai
19/01/2016 02:23	111.624	2.36247	0	4101.16	LI820	28.14	28.1	0.9987	3931.72	0.0313	402.89	450.146	402.89	10.0483	3.19767	Belawai
19/01/2016 02:24	111.622	2.36243	0	4121.08	LI820	28.12	28.1	0.9987	3953.24	0.0313	402.89	450.146	402.89	10.0483	3.21716	Belawai
19/01/2016 02:25	111.62	2.36213	0	4155.84	LI820	28.13	28.1	0.9987	3984.44	0.0313	402.89	450.146	402.89	10.0483	3.24542	Belawai
19/01/2016 02:26	111.618	2.36174	0	4200.56	LI820	28.15	28.1	0.9989	4025.51	0.0313	402.89	450.146	402.89	10.0483	3.28255	Belawai
19/01/2016 02:27	111.616	2.36109	0	4235.31	LI820	28.14	28.1	0.9989	4060.55	0.0313	402.89	450.146	402.89	10.0483	3.31429	Belawai
19/01/2016 02:28	111.614	2.36015	0	4252.79	LI820	28.13	28.1	0.9989	4078.09	0.0313	402.89	450.146	402.89	10.0483	3.33017	Belawai
19/01/2016 02:29	111.613	2.35885	0	4267.83	LI820	28.14	28.1	0.9989	4091.78	0.0313	402.89	450.146	402.89	10.0483	3.34257	Belawai
19/01/2016 02:30	111.613	2.35873	0	4245.27	LI820	28.14	28.1	0.9992	4070.85	0.0313	402.89	450.146	402.89	10.0483	3.32351	Belawai
19/01/2016 02:31	111.613	2.35864	0	4250.35	LI820	28.14	28.1	0.9988	4074.09	0.0313	402.89	450.146	402.89	10.0483	3.32659	Belawai
19/01/2016 02:32	111.612	2.35833	0	4250.35	LI820	28.17	28.1	0.9988	4068.38	0.0313	402.89	450.146	402.89	10.0483	3.32141	Belawai
19/01/2016 02:33	111.611	2.35675	0	4277.59	LI820	28.17	28.11	0.9988	4097.69	0.03129	402.693	449.929	402.693	10.0507	3.34771	Belawai
19/01/2016 02:34	111.61	2.35498	0	4260.31	LI820	28.16	28.13	0.9988	4085.44	0.03127	402.301	449.494	402.301	10.0556	3.33611	Belawai
19/01/2016 02:35	111.609	2.35318	0	4275.15	LI820	28.15	28.15	0.9988	4105.6	0.03126	401.909	449.061	401.909	10.0605	3.35493	Belawai
19/01/2016 02:36	111.608	2.35131	0	4275.15	LI820	28.14	28.17	0.9988	4111.46	0.03124	401.517	448.627	401.517	10.0654	3.35972	Belawai
19/01/2016 02:37	111.607	2.34957	0	4275.15	LI820	28.15	28.19	0.9988	4113.1	0.03122	401.126	448.194	401.126	10.0703	3.36069	Belawai
19/01/2016 02:38	111.605	2.34796	0	4295.07	LI820	28.19	28.2	0.9988	4127.44	0.03122	400.931	447.978	400.931	10.0728	3.3745	Belawai
19/01/2016 02:39	111.604	2.34661	0	4322.51	LI820	28.21	28.2	0.9988	4149.58	0.03122	400.931	447.978	400.931	10.0728	3.39455	Belawai
19/01/2016 02:40	111.602	2.34519	0	4292.63	LI820	28.26	28.2	0.9988	4112.72	0.03122	400.931	447.978	400.931	10.0728	3.36117	Belawai
19/01/2016 02:41	111.601	2.34365	0	4329.83	LI820	28.23	28.2	0.9988	4152.39	0.03122	400.931	447.978	400.931	10.0728	3.3971	Belawai
19/01/2016 02:42	111.601	2.34184	0	4314.99	LI820	28.23	28.2	0.9988	4138.04	0.03122	400.931	447.978	400.931	10.0728	3.3841	Belawai
19/01/2016 02:43	111.6	2.33995	0	4334.91	LI820	28.19	28.2	0.9988	4165.89	0.03122	400.931	447.978	400.931	10.0728	3.40932	Belawai
19/01/2016 02:44	111.6	2.33806	0	4354.83	LI820	28.2	28.2	0.9988	4182.51	0.03122	400.931	447.978	400.931	10.0728	3.42438	Belawai
19/01/2016 02:45	111.6	2.3362	0	4382.06	LI820	28.17	28.2	0.9988	4212.81	0.03122	400.931	447.978	400.931	10.0728	3.45182	Belawai
19/01/2016 02:46	111.601	2.33443	0	4382.06	LI820	28.18	28.2	0.9986	4211.96	0.03122	400.931	447.978	400.931	10.0728	3.45112	Belawai
19/01/2016 02:47	111.601	2.33278	0	4392.02	LI820	28.18	28.2	0.9986	4221.39	0.03122	400.931	447.978	400.931	10.0728	3.45966	Belawai
19/01/2016 02:48	111.602	2.33124	0	4379.63	LI820	28.22	28.21	0.9986	4204.44	0.03121	400.735	447.762	400.735	10.0753	3.44405	Belawai
19/01/2016 02:49	111.603	2.32942	0	4349.75	LI820	28.2	28.22	0.9986	4181.73	0.0312	400.54	447.546	400.54	10.0777	3.42322	Belawai
19/01/2016 02:50	111.602	2.3277	0	4314.99	LI820	28.19	28.24	0.9986	4151.63	0.03119	400.15	447.114	400.15	10.0826	3.39653	Belawai
19/01/2016 02:51	111.601	2.32632	0	4339.79	LI820	28.28	28.25	0.9986	4158.65	0.03118	399.955	446.898	399.955	10.0851	3.40262	Belawai
19/01/2016 02:52	111.599	2.3256	0	4290.19	LI820	28.51	28.27	0.9986	4070.13	0.03116	399.565	446.467	399.565	10.09	3.32195	Belawai
19/01/2016 02:53	111.597	2.32548	0	4260.31	LI820	28.61	28.28	0.9986	4024.76	0.03115	399.37	446.251	399.37	10.0925	3.28061	Belawai
19/01/2016 02:54	111.596	2.32543	0	4193.04	LI820	28.33	28.3	0.9986	4020.11	0.03114	398.981	445.82	398.981	10.0974	3.27695	Belawai
19/01/2016 02:55	111.594	2.32568	0	4111.12	LI820	28.26	28.3	0.9986	3955.57	0.03114	398.981	445.82	398.981	10.0974	3.2185	Belawai
19/01/2016 02:56	111.592	2.32598	0	4141	LI820	28.32	28.3	0.9986	3974.69	0.03114	398.981	445.82	398.981	10.0974	3.23581	Belawai
19/01/2016 02:57	111.59	2.32636	0	4141	LI820	28.28	28.3	0.9986	3980.88	0.03114	398.981	445.82	398.981	10.0974	3.24142	Belawai
19/01/2016 02:58	111.589	2.32663	0	4150.76	LI820	28.32	28.3	0.9986	3983.88	0.03114	398.981	445.82	398.981	10.0974	3.24414	Belawai
19/01/2016 02:59	111.587	2.32714	0	4160.72	LI820	28.35	28.3	0.9986	3986.27	0.03114	398.981	445.82	398.981	10.0974	3.2463	Belawai
19/01/2016 03:00	111.585	2.32755	0	4175.76	LI820	28.35	28.3	0.9986	4002.25	0.03114	398.981	445.82	398.981	10.0974	3.26077	Belawai
19/01/2016 03:01	111.584	2.32781	0	4198.12	LI820	28.34	28.3	0.9986	4024.09	0.03114	398.981	445.82	398.981	10.0974	3.28055	Belawai
19/01/2016 03:02	111.582	2.32801	0	4185.72	LI820	28.41	28.3	0.9986	4001.49	0.03114	398.981	445.82	398.981	10.0974	3.26008	Belawai
19/01/2016 03:03	111.58	2.32814	0	4190.6	LI820	28.34	28.3	0.9986	4018.08	0.03114	398.981	445.82	398.981	10.0974	3.27511	Belawai
19/01/2016 03:04	111.578	2.32837	0	4190.6	LI820	28.38	28.3	0.9986	4011.4	0.03114	398.981	445.82	398.981	10.0974	3.26906	Belawai
19/01/2016 03:05	111.577	2.32857	0	4190.6	LI820	28.34	28.3	0.9986	4017.48	0.03114	398.981	445.82	398.981	10.0974	3.27456	Belawai
19/01/2016 03:06	111.575	2.32905	0	4185.72	LI820	28.32	28.3	0.9986	4016.41	0.03114	398.981	445.82	398.981	10.0974	3.27359	Belawai
19/01/2016 03:07	111.574	2.32923	0	4175.76	LI820	28.32	28.3	0.9986	4006.56	0.03114	398.981	445.82	398.981	10.0974	3.26467	Belawai
19/01/2016 03:08	111.572	2.32899	0	4170.68	LI820	28.32	28.3	0.9986	4001.68	0.03114	398.981	445.82	398.981	10.0974	3.26026	Belawai
19/01/2016 03:09	111.57	2.32854	0	4170.68	LI820	28.31	28.3	0.9989	4005.74	0.03114	398.981	445.82	398.981	10.0974	3.26382	Belawai
19/01/2016 03:10	111.569	2.32781	0	4170.68	LI820	28.29	28.3	0.9985	4008.47	0.03114	398.981	445.82	398.981	10.0974	3.26644	Belawai
19/01/2016 03:11	111.567	2.32734	0	4188.16	LI820	28.29	28.3	0.9985	4025.39	0.03114	398.981	445.82	398.981	10.0974	3.28176	Belawai
19/01/2016 03:12	111.566	2.3269	0	4188.16	LI820	28.28	28.3	0.9985	4025.38	0.03114	398.981	445.82	398.981	10.0974	3.28175	Belawai
19/01/2016 03:13	111.564	2.32628	0	4203	LI820	28.31	28.3	0.9985	4034.06	0.03114	398.981	445.82	398.981	10.0974	3.28961	Belawai
19/01/2016 03:14	111.562	2.32595	0	4183.28	LI820	28.32	28.3	0.9985	4013.47	0.03114	398.981	445.82	398.981	10.0974	3.27097	Belawai
19/01/2016 03:15	111.561	2.32598	0	4148.32	LI820	28.3	28.32	0.9985	3986.2	0.03113	398.592	445.39	398.592	10.1023	3.24681	Belawai
19/01/2016 03:16	111.559	2.32626	0	4170.68	LI820	28.29	28.34	0.9985	4012.27	0.03111	398.204	444.96	398.204	10.1072	3.26992	Belawai
19/01/2016 03:17	111.557	2.32667	0	4225.56	LI820	28.31	28.36	0.9985	4064.99	0.03109	397.816	444.531	397.816	10.1122	3.31714	Belawai
19/01/2016 03:18	111.556	2.32737	0	4212.96	LI820	28.33	28.38	0.9985	4053.13	0.03108	397.428	444.102	397.428	10.1171	3.30695	Belawai
19/01/2016 03:19	111.555	2.32846	0	4212.96	LI820	28.38	28.4	0.9985	4050.1	0.03106	397.041	443.674	397.041	10.122	3.30369	Belawai
19/01/2016 03:20	111.554	2.32985	0	4185.72	LI820	28.42	28.42	0.9985	4019	0.03105	396.654	443.246	396.654	10.127	3.27608	Belawai
19/01/2016 03:21	111.554	2.33141	0	4193.04	LI820	28.42	28.44	0.9984	4027.45	0.03103	396.268	442.818	396.268	10.1319	3.28325	Belawai
19/01/2016 03:22	111.554	2.33291	0	4208.08	LI820	28.43	28.46	0.9984	4042.17	0.03101	395.882	442.391	395.882	10.1368	3.29606	Belawai
19/01/2016 03:23	111.553	2.33454	0	4237.96	LI820	28.41	28.48	0.9984	4077.5	0.031	395.496	441.964	395.496	10.1418	3.32859	Belawai
19/01/2016 03:24	111.553	2.33614	0	4247.92	LI820	28.4	28.5	0.9984	4091.99	0.03098	395.11	441.537	395.11	10.1467	3.34118	Belawai
19/01/2016 03:25	111.553	2.33767	0	4230.44	LI820	28.44	28.5	0.9984	4070.37	0.03098	395.11	441.537	395.11	10.1467	3.32161	Belawai
19/01/2016 03:26	111.553	2.33925	0	4250.35	LI820	28.44	28.5	0.9984	4087.92	0.03098	395.11	441.537	395.11	10.1467	3.3375	Belawai
19/01/2016 03:27	111.553	2.3408	0	4222.91	LI820	28.47	28.5	0.9984	4056.54	0.03098	395.11	441.537	395.11	10.1467	3.30909	Belawai
19/01/2016 03:28	111.553	2.3424	0	4203	LI820	28.42	28.5	0.9984	4044.96	0.03098	395.11	441.537	395.11	10.1467	3.29861	Belawai
19/01/2016 03:29	111.553	2.34399	0	4222.91	LI820	28.43	28.5	0.9984	4060.9	0.03098	395.11	441.537	395.11	10.1467	3.31304	Belawai
19/01/2016 03:30	111.553	2.34561	0	4215.6	LI820	28.47	28.48	0.9984	4044.65	0.03099	395.496	441.964	395.496	10.1418	3.29778	Belawai
19/01/2016 03:31	111.553	2.34721	0	4228	LI820	28.47	28.46	0.9984	4053.04	0.03101	395.882	442.391	395.882	10.1368	3.3059	Belawai
19/01/2016 03:32	111.553	2.34882	0	4235.31	LI820	28.49	28.44	0.9984	4052.74	0.03103	396.268	442.818	396.268	10.1319	3.30615	Belawai
19/01/2016 03:33	111.553	2.35038	0	4222.91	LI820	28.55	28.42	0.9984	4027.59	0.03104	396.654	443.246	396.654	10.127	3.28283	Belawai
19/01/2016 03:34	111.553	2.35197	0	4242.83	LI820	28.55	28.4	0.9984	4042.88	0.03106	397.041	443.674	397.041	10.122	3.29719	Belawai
19/01/2016 03:35	111.553	2.3536	0	4203	LI820	28.51	28.42	0.9985	4014.43	0.03105	396.654	443.246	396.654	10.127	3.27194	Belawai
19/01/2016 03:36	111.553	2.3553	0	4193.04	LI820	28.48	28.44	0.9983	4013.23	0.03103	396.268	442.818	396.268	10.1319	3.27041	Belawai
19/01/2016 03:37	111.553	2.35698	0	4208.08	LI820	28.48	28.46	0.9983	4031.46	0.03101	395.882	442.391	395.882	10.1368	3.2864	Belawai
19/01/2016 03:38	111.552	2.35861	0	4232.87	LI820	28.44	28.48	0.9983	4066.71	0.031	395.496	441.964	395.496	10.1418	3.31886	Belawai
19/01/2016 03:39	111.551	2.36022	0	4247.92	LI820	28.47	28.5	0.9983	4079.11	0.03098	395.11	441.537	395.11	10.1467	3.32956	Belawai
19/01/2016 03:40	111.55	2.36129	0.2	4272.71	LI820	28.47	28.5	0.9983	4103.44	0.03098	395.11	441.537	395.11	10.1467	3.35159	Belawai
19/01/2016 03:41	111.548	2.36165	0.2	4272.71	LI820	28.47	28.5	0.9983	4103.65	0.03098	395.11	441.537	395.11	10.1467	3.35178	Belawai
19/01/2016 03:42	111.546	2.36155	0.2	4255.23	LI820	28.47	28.5	0.9983	4086.95	0.03098	395.11	441.537	395.11	10.1467	3.33666	Belawai
19/01/2016 03:43	111.545	2.3615	0.2	4290.19	LI820	28.46	28.5	0.9983	4123.1	0.03098	395.11	441.537	395.11	10.1467	3.36938	Belawai
19/01/2016 03:44	111.543	2.36145	0.2	4290.19	LI820	28.47	28.5	0.9983	4121.21	0.03098	395.11	441.537	395.11	10.1467	3.36767	Belawai
19/01/2016 03:45	111.542	2.36101	0.2	4257.87	LI820	28.47	28.48	0.9983	4087.46	0.03099	395.496	441.964	395.496	10.1418	3.33657	Belawai
19/01/2016 03:46	111.541	2.36012	0.2	4275.15	LI820	28.46	28.46	0.9983	4102.43	0.03101	395.882	442.391	395.882	10.1368	3.35065	Belawai
19/01/2016 03:47	111.539	2.35914	0.2	4260.31	LI820	28.44	28.44	0.9983	4088.45	0.03103	396.268	442.818	396.268	10.1319	3.33852	Belawai
19/01/2016 03:48	111.538	2.3579	0.1	4255.23	LI820	28.41	28.42	0.9981	4084.7	0.03104	396.654	443.246	396.654	10.127	3.33464	Belawai
19/01/2016 03:49	111.537	2.35658	0.1	4255.23	LI820	28.42	28.4	0.9981	4080.67	0.03106	397.041	443.674	397.041	10.122	3.33152	Belawai
19/01/2016 03:50	111.536	2.35524	0.1	4230.44	LI820	28.42	28.4	0.9981	4056.6	0.03106	397.041	443.674	397.041	10.122	3.30972	Belawai
19/01/2016 03:51	111.535	2.35394	0	4265.19	LI820	28.41	28.4	0.9981	4090.34	0.03106	397.041	443.674	397.041	10.122	3.34027	Belawai
19/01/2016 03:52	111.534	2.35281	0	4292.63	LI820	28.41	28.4	0.9981	4116.18	0.03106	397.041	443.674	397.041	10.122	3.36367	Belawai
19/01/2016 03:53	111.532	2.35197	0	4282.67	LI820	28.4	28.4	0.9981	4109.24	0.03106	397.041	443.674	397.041	10.122	3.35739	Belawai
19/01/2016 03:54	111.531	2.35134	0	4292.63	LI820	28.38	28.4	0.998	4120.63	0.03106	397.041	443.674	397.041	10.122	3.36774	Belawai
19/01/2016 03:55	111.529	2.35085	0	4317.43	LI820	28.39	28.4	0.998	4143.37	0.03106	397.041	443.674	397.041	10.122	3.38833	Belawai
19/01/2016 03:56	111.528	2.35008	0	4324.95	LI820	28.39	28.4	0.998	4150.64	0.03106	397.041	443.674	397.041	10.122	3.39491	Belawai
19/01/2016 03:57	111.526	2.34939	0	4277.59	LI820	28.39	28.4	0.998	4104.97	0.03106	397.041	443.674	397.041	10.122	3.35356	Belawai
19/01/2016 03:58	111.525	2.34922	0	4237.96	LI820	28.39	28.4	0.998	4066.23	0.03106	397.041	443.674	397.041	10.122	3.31848	Belawai
19/01/2016 03:59	111.523	2.34906	0	4237.96	LI820	28.41	28.4	0.998	4062.4	0.03106	397.041	443.674	397.041	10.122	3.31501	Belawai
19/01/2016 04:00	111.521	2.349	0	4237.96	LI820	28.43	28.4	0.998	4058.53	0.03106	397.041	443.674	397.041	10.122	3.31151	Belawai
19/01/2016 04:01	111.52	2.34915	0	4257.87	LI820	28.42	28.4	0.998	4079.01	0.03106	397.041	443.674	397.041	10.122	3.33005	Belawai
19/01/2016 04:02	111.518	2.34957	0	4262.75	LI820	28.43	28.4	0.998	4081.99	0.03106	397.041	443.674	397.041	10.122	3.33275	Belawai
19/01/2016 04:03	111.517	2.35012	0	4287.55	LI820	28.44	28.4	0.998	4103.87	0.03106	397.041	443.674	397.041	10.122	3.35256	Belawai
19/01/2016 04:04	111.515	2.35081	0	4275.15	LI820	28.45	28.4	0.998	4090.53	0.03106	397.041	443.674	397.041	10.122	3.34048	Belawai
19/01/2016 04:05	111.514	2.35155	0	4267.83	LI820	28.46	28.42	0.9979	4083.53	0.03105	396.654	443.246	396.654	10.127	3.33473	Belawai
19/01/2016 04:06	111.512	2.35196	0	4302.59	LI820	28.47	28.44	0.9979	4117.12	0.03103	396.268	442.818	396.268	10.1319	3.36462	Belawai
19/01/2016 04:07	111.511	2.35189	0	4265.19	LI820	28.48	28.46	0.9979	4083.37	0.03101	395.882	442.391	395.882	10.1368	3.33354	Belawai
19/01/2016 04:08	111.51	2.35121	0	4265.19	LI820	28.49	28.48	0.9979	4087.03	0.031	395.496	441.964	395.496	10.1418	3.3374	Belawai
19/01/2016 04:09	111.51	2.35106	0	4225.56	LI820	28.45	28.5	0.9979	4059.34	0.03098	395.11	441.537	395.11	10.1467	3.31181	Belawai
19/01/2016 04:10	111.51	2.35104	0	4225.56	LI820	28.44	28.5	0.9977	4061.27	0.03098	395.11	441.537	395.11	10.1467	3.31363	Belawai
19/01/2016 04:11	111.51	2.35103	0	4235.31	LI820	28.46	28.5	0.9977	4065.97	0.03098	395.11	441.537	395.11	10.1467	3.31788	Belawai
19/01/2016 04:12	111.51	2.3511	0	4235.31	LI820	28.49	28.5	0.9977	4061.35	0.03098	395.11	441.537	395.11	10.1467	3.3137	Belawai
19/01/2016 04:13	111.51	2.35113	0	4252.79	LI820	28.5	28.5	0.9977	4077.73	0.03098	395.11	441.537	395.11	10.1467	3.32853	Belawai
19/01/2016 04:14	111.51	2.35115	0	4260.31	LI820	28.47	28.5	0.9977	4089.73	0.03098	395.11	441.537	395.11	10.1467	3.33939	Belawai
19/01/2016 04:15	111.51	2.35116	0	4275.15	LI820	28.47	28.5	0.9977	4104.97	0.03098	395.11	441.537	395.11	10.1467	3.35319	Belawai
19/01/2016 04:16	111.51	2.35111	0	4295.07	LI820	28.46	28.5	0.9977	4124.94	0.03096	395.11	441.537	395.243	10.145	3.36853	Belawai
19/01/2016 04:17	111.51	2.35111	0	4232.87	LI820	28.46	28.5	0.9977	4067.24	0.03094	395.11	441.537	395.508	10.1416	3.31308	Belawai
19/01/2016 04:18	111.51	2.3511	0	4228	LI820	28.46	28.51	0.9979	4064.61	0.03092	394.918	441.324	395.448	10.1424	3.30874	Belawai
19/01/2016 04:19	111.51	2.35118	0	4282.67	LI820	28.46	28.51	0.9976	4116.65	0.0309	394.918	441.324	395.581	10.1407	3.35312	Belawai
19/01/2016 04:20	111.51	2.35124	0	4242.83	LI820	28.46	28.52	0.9976	4079.36	0.03088	394.726	441.111	395.521	10.1415	3.31757	Belawai
19/01/2016 04:43	111.476	2.3584	4	3374.93	LI820	28.77	28.67	0.9975	3223.03	0.0304	391.851	437.93	396.327	10.1311	2.50315	Belawai
19/01/2016 04:44	111.475	2.35957	4.2	3397.29	LI820	28.81	28.68	0.9975	3238.91	0.03038	391.66	437.718	396.266	10.1319	2.51577	Belawai
19/01/2016 04:45	111.473	2.36056	4.5	3444.65	LI820	28.82	28.69	0.9975	3283.67	0.03036	391.469	437.507	396.204	10.1327	2.55397	Belawai
19/01/2016 04:46	111.471	2.36159	4.7	3434.69	LI820	28.87	28.69	0.9973	3267.24	0.03034	391.469	437.507	396.336	10.131	2.53739	Belawai
19/01/2016 04:47	111.47	2.36217	4.9	3467	LI820	28.81	28.7	0.9973	3306.89	0.03032	391.278	437.296	396.406	10.1301	2.57056	Belawai
19/01/2016 04:48	111.468	2.36303	5.1	3454.6	LI820	28.81	28.7	0.9973	3296.5	0.0303	391.278	437.296	396.537	10.1284	2.55926	Belawai
19/01/2016 04:49	111.466	2.36402	5.4	3464.56	LI820	28.84	28.7	0.9973	3301.16	0.03028	391.278	437.296	396.669	10.1268	2.56126	Belawai
19/01/2016 04:50	111.464	2.36486	5.6	3499.32	LI820	28.8	28.7	0.9972	3338.73	0.03027	391.278	437.296	396.8	10.1251	2.59319	Belawai
19/01/2016 04:51	111.463	2.36569	5.9	3511.72	LI820	28.76	28.7	0.9972	3357.65	0.03025	391.278	437.296	396.932	10.1234	2.60773	Belawai
19/01/2016 04:52	111.461	2.36656	6.1	3524.12	LI820	28.78	28.7	0.9972	3366.88	0.03024	391.278	437.296	397.195	10.1201	2.61414	Belawai
19/01/2016 04:53	111.459	2.36738	6.4	3534.08	LI820	28.81	28.7	0.9972	3371.47	0.03022	391.278	437.296	397.326	10.1184	2.61602	Belawai
19/01/2016 04:54	111.457	2.36826	6.6	3571.48	LI820	28.84	28.7	0.9972	3402.88	0.0302	391.278	437.296	397.458	10.1167	2.6415	Belawai
19/01/2016 04:55	111.455	2.36912	6.9	3598.71	LI820	28.84	28.7	0.9972	3429.08	0.03019	391.278	437.296	397.589	10.115	2.66323	Belawai
19/01/2016 04:56	111.453	2.3702	7.1	3613.75	LI820	28.85	28.7	0.9972	3440.94	0.03017	391.278	437.296	397.852	10.1117	2.671	Belawai
19/01/2016 04:57	111.452	2.37134	7.3	3618.63	LI820	28.92	28.7	0.9971	3434.37	0.03016	391.278	437.296	397.984	10.11	2.66394	Belawai
19/01/2016 04:58	111.45	2.37241	7.6	3646.07	LI820	28.9	28.72	0.9971	3467.13	0.03012	390.897	436.874	397.728	10.1133	2.69001	Belawai
19/01/2016 04:59	111.448	2.37373	7.8	3650.95	LI820	28.88	28.74	0.9971	3476.78	0.03009	390.516	436.453	397.472	10.1165	2.69665	Belawai
19/01/2016 05:00	111.446	2.37455	8.1	3628.59	LI820	28.87	28.76	0.9971	3460.02	0.03006	390.136	436.032	397.348	10.1181	2.6797	Belawai
19/01/2016 05:01	111.444	2.37566	8.4	3673.31	LI820	28.82	28.78	0.9971	3514.78	0.03003	389.756	435.611	397.093	10.1214	2.72582	Belawai
19/01/2016 05:02	111.442	2.37665	8.7	3690.79	LI820	28.81	28.8	0.9971	3535.92	0.03	389.376	435.191	396.838	10.1246	2.74247	Belawai
19/01/2016 05:03	111.44	2.37763	9	3678.39	LI820	28.83	28.89	0.9971	3532.37	0.02992	387.673	433.306	395.235	10.1451	2.73759	Belawai
19/01/2016 05:04	111.438	2.37788	9.2	3683.27	LI820	28.88	28.97	0.9969	3541.44	0.02984	386.165	431.637	393.96	10.1615	2.74268	Belawai
19/01/2016 05:05	111.436	2.3779	9.4	3683.27	LI820	28.88	29.06	0.9969	3555.06	0.02976	384.475	429.767	392.369	10.1821	2.75275	Belawai
19/01/2016 05:06	111.434	2.37751	9.6	3623.71	LI820	28.98	29.14	0.9969	3494.68	0.02968	382.98	428.112	390.975	10.2002	2.69759	Belawai
19/01/2016 05:07	111.432	2.37712	9.8	3536.52	LI820	29.05	29.23	0.9969	3412.07	0.0296	381.305	426.258	389.397	10.2209	2.62379	Belawai
19/01/2016 05:08	111.431	2.37674	9.9	3449.52	LI820	29.12	29.29	0.9969	3327.24	0.02953	380.193	425.027	388.519	10.2324	2.54672	Belawai
19/01/2016 05:09	111.429	2.37629	10.1	3397.29	LI820	29.16	29.23	0.9969	3261.22	0.02955	381.305	426.258	390.039	10.2125	2.48609	Belawai
19/01/2016 05:10	111.427	2.37586	10.2	3332.65	LI820	29.28	29.17	0.9969	3174.94	0.02956	382.421	427.493	391.436	10.1942	2.40762	Belawai
19/01/2016 05:11	111.426	2.37513	10.3	3198.3	LI820	29.33	29.11	0.9969	3031.19	0.02958	383.54	428.732	392.837	10.176	2.28033	Belawai
19/01/2016 05:12	111.424	2.37409	10.5	3108.87	LI820	29.31	29.05	0.9969	2941.81	0.02959	384.663	429.974	394.243	10.1579	2.19965	Belawai
19/01/2016 05:13	111.422	2.37316	10.6	3108.87	LI820	29.17	29.01	0.9968	2955.76	0.02959	385.413	430.805	395.399	10.143	2.20853	Belawai
19/01/2016 05:14	111.42	2.372	10.8	3136.3	LI820	29.11	29.07	0.9968	2996.69	0.02952	384.288	429.56	394.507	10.1545	2.24113	Belawai
19/01/2016 05:15	111.418	2.37062	10.9	3181.02	LI820	29.07	29.13	0.9968	3052.44	0.02945	383.167	428.319	393.616	10.166	2.28641	Belawai
19/01/2016 05:16	111.416	2.36935	11.1	3230.82	LI820	29.05	29.19	0.9968	3111.42	0.02937	382.049	427.081	392.857	10.1758	2.33317	Belawai
19/01/2016 05:17	111.414	2.36853	11.2	3300.33	LI820	29	29.25	0.9968	3193.51	0.0293	380.934	425.848	391.97	10.1873	2.40081	Belawai
19/01/2016 05:18	111.412	2.36791	11.4	3352.57	LI820	28.98	29.31	0.9968	3254.66	0.02923	379.823	424.617	391.086	10.1988	2.45028	Belawai
19/01/2016 05:19	111.41	2.36736	11.6	3414.77	LI820	29.05	29.37	0.9966	3311.83	0.02916	378.715	423.391	390.203	10.2103	2.49627	Belawai
19/01/2016 05:20	111.408	2.36698	11.8	3315.37	LI820	29.3	29.43	0.9966	3188.78	0.02909	377.61	422.168	389.45	10.2202	2.38732	Belawai
19/01/2016 05:21	111.406	2.3666	11.9	3091.39	LI820	29.46	29.49	0.9966	2959.71	0.02901	376.509	420.949	388.571	10.2317	2.18763	Belawai
19/01/2016 05:22	111.405	2.36629	12.1	2934.88	LI820	29.55	29.55	0.9966	2804.98	0.02894	375.411	419.734	387.695	10.2433	2.05271	Belawai
19/01/2016 05:23	111.403	2.3662	12.3	2808.05	LI820	29.64	29.59	0.9966	2678.61	0.02888	374.681	418.926	387.323	10.2482	1.94172	Belawai
19/01/2016 05:24	111.401	2.36614	12.5	2671.25	LI820	29.68	29.53	0.9966	2537.07	0.0289	375.777	420.139	388.705	10.23	1.81909	Belawai
19/01/2016 05:25	111.399	2.36621	12.7	2554.38	LI820	29.67	29.47	0.9965	2420.99	0.02891	376.876	421.355	390.093	10.2118	1.71782	Belawai
19/01/2016 05:26	111.397	2.36621	12.9	2467.18	LI820	29.63	29.41	0.9965	2335.91	0.02893	377.978	422.576	391.612	10.1919	1.64342	Belawai
19/01/2016 05:27	111.395	2.36614	13.2	2412.51	LI820	29.51	29.35	0.9965	2291.17	0.02894	379.084	423.799	393.01	10.1738	1.60313	Belawai
19/01/2016 05:28	111.392	2.36603	13.4	2424.91	LI820	29.5	29.31	0.9965	2299.59	0.02894	379.823	424.617	394.157	10.159	1.60792	Belawai
19/01/2016 05:29	111.39	2.36602	13.7	2524.5	LI820	29.44	29.35	0.9965	2404.66	0.02888	379.084	423.799	393.648	10.1655	1.69446	Belawai
19/01/2016 05:30	111.387	2.36532	13.9	2603.98	LI820	29.45	29.39	0.9965	2483.77	0.02883	378.346	422.983	393.14	10.1721	1.75944	Belawai
19/01/2016 05:31	111.386	2.36387	14	2648.9	LI820	29.39	29.43	0.9965	2536.57	0.02877	377.61	422.168	392.76	10.177	1.80115	Belawai
19/01/2016 05:32	111.384	2.36284	14.1	2678.57	LI820	29.34	29.47	0.9965	2575.21	0.02871	376.876	421.355	392.253	10.1836	1.83109	Belawai
19/01/2016 05:33	111.383	2.36175	14.2	2651.33	LI820	29.6	29.5	0.9965	2523.58	0.02866	376.326	420.747	391.937	10.1877	1.78522	Belawai
19/01/2016 05:34	111.381	2.36057	14.3	2479.79	LI820	29.61	29.5	0.9965	2360.27	0.02863	376.326	420.747	392.317	10.1828	1.64537	Belawai
19/01/2016 05:35	111.38	2.35913	14.4	2397.67	LI820	29.5	29.5	0.9965	2292.93	0.0286	376.326	420.747	392.571	10.1795	1.58666	Belawai
19/01/2016 05:36	111.379	2.35769	14.4	2320.64	LI820	29.43	29.5	0.9965	2225.94	0.02857	376.326	420.747	392.952	10.1745	1.52814	Belawai
19/01/2016 05:37	111.377	2.3566	14.5	2233.44	LI820	29.43	29.5	0.9965	2142.13	0.02854	376.326	420.747	393.206	10.1713	1.45598	Belawai
19/01/2016 05:38	111.375	2.35526	14.6	2191.16	LI820	29.53	29.5	0.9963	2091.63	0.02851	376.326	420.747	393.46	10.168	1.41188	Belawai
19/01/2016 05:39	111.374	2.35349	14.6	2151.53	LI820	29.53	29.5	0.9963	2054.42	0.02848	376.326	420.747	393.84	10.1631	1.3787	Belawai
19/01/2016 05:40	111.372	2.35176	14.6	2064.33	LI820	29.52	29.5	0.9963	1971.68	0.02846	376.326	420.747	394.094	10.1598	1.30838	Belawai
19/01/2016 05:41	111.371	2.35025	14.6	2024.69	LI820	29.49	29.5	0.9963	1936.43	0.02843	376.326	420.747	394.475	10.1549	1.27706	Belawai
19/01/2016 05:42	111.368	2.34912	14.8	2002.13	LI820	29.47	29.5	0.9962	1917.01	0.02841	376.326	420.747	394.602	10.1533	1.25986	Belawai
19/01/2016 05:43	111.366	2.34798	14.9	1977.34	LI820	29.5	29.5	0.9962	1890.57	0.02841	376.326	420.747	394.602	10.1533	1.23789	Belawai
19/01/2016 05:44	111.364	2.34715	15.1	2009.65	LI820	29.52	29.59	0.9962	1926.93	0.02831	374.681	418.926	393.264	10.1705	1.26578	Belawai
19/01/2016 05:45	111.362	2.34738	15.3	2037.09	LI820	29.51	29.69	0.9962	1962.26	0.02821	372.863	416.913	391.741	10.1903	1.29301	Belawai
19/01/2016 05:46	111.36	2.34855	15.6	2061.89	LI820	29.56	29.79	0.9962	1990.19	0.02811	371.053	414.909	390.099	10.2117	1.31423	Belawai
19/01/2016 05:47	111.358	2.34978	16	2094.21	LI820	29.53	29.89	0.9962	2032.56	0.028	369.253	412.917	388.59	10.2315	1.34658	Belawai
19/01/2016 05:48	111.356	2.35097	16.3	2064.33	LI820	29.67	29.99	0.9962	1998.99	0.0279	367.462	410.934	387.086	10.2513	1.31672	Belawai
19/01/2016 05:49	111.354	2.35178	16.5	1964.94	LI820	29.79	29.94	0.9962	1888.73	0.0279	368.356	411.924	388.397	10.234	1.22383	Belawai
19/01/2016 05:50	111.352	2.35246	16.8	1773.47	LI820	29.92	29.88	0.996	1690.2	0.02791	369.433	413.115	389.901	10.2143	1.05897	Belawai
19/01/2016 05:51	111.35	2.35334	17.1	1584.44	LI820	30.02	29.82	0.996	1499.62	0.02792	370.512	414.31	391.285	10.1962	0.901226	Belawai
19/01/2016 05:52	111.348	2.3545	17.4	1475.09	LI820	30.05	29.76	0.996	1391.09	0.02793	371.595	415.509	392.799	10.1765	0.810969	Belawai
19/01/2016 05:53	111.347	2.35568	17.7	1427.73	LI820	29.94	29.7	0.996	1349.48	0.02793	372.681	416.712	394.319	10.1569	0.775409	Belawai
19/01/2016 05:54	111.345	2.35662	17.9	1400.49	LI820	29.92	29.76	0.996	1327.98	0.02787	371.595	415.509	393.552	10.1668	0.756952	Belawai
19/01/2016 05:55	111.343	2.35752	18.2	1368.18	LI820	29.91	29.82	0.9959	1301.04	0.02779	370.512	414.31	392.787	10.1767	0.733604	Belawai
19/01/2016 05:56	111.341	2.35818	18.5	1340.74	LI820	30.08	29.88	0.9959	1268.12	0.02772	369.433	413.115	391.898	10.1882	0.70581	Belawai
19/01/2016 05:57	111.341	2.3584	18.5	1303.34	LI820	29.95	29.94	0.9959	1243.75	0.02765	368.356	411.924	391.136	10.1981	0.684922	Belawai
19/01/2016 05:58	111.341	2.35849	18.6	1296.02	LI820	29.98	30	0.9959	1237.96	0.02757	367.283	410.736	390.375	10.2081	0.678912	Belawai
19/01/2016 05:59	111.341	2.35851	18.6	1273.66	LI820	29.91	29.96	0.9959	1218.52	0.02757	367.998	411.527	391.504	10.1933	0.662199	Belawai
19/01/2016 06:00	111.341	2.35843	18.6	1263.7	LI820	30.02	29.91	0.996	1200.64	0.02757	368.894	412.519	392.825	10.1762	0.646605	Belawai
19/01/2016 06:01	111.341	2.35842	18.6	1248.66	LI820	29.98	29.86	0.996	1186.19	0.02761	369.792	413.513	393.526	10.1671	0.635284	Belawai
19/01/2016 06:02	111.341	2.35838	18.6	1226.3	LI820	29.72	29.81	0.996	1176.66	0.02766	370.692	414.51	394.354	10.1564	0.628056	Belawai
19/01/2016 06:03	111.341	2.35832	18.5	1203.94	LI820	29.61	29.77	0.9959	1158.02	0.02772	371.414	415.309	394.867	10.1498	0.613938	Belawai
19/01/2016 06:04	111.341	2.35831	18.5	1184.03	LI820	29.6	29.72	0.9959	1136.93	0.02777	372.319	416.311	395.572	10.1408	0.597392	Belawai
19/01/2016 06:05	111.341	2.35829	18.5	1174.07	LI820	29.58	29.67	0.9959	1126.07	0.02783	373.226	417.314	396.278	10.1318	0.58933	Belawai
19/01/2016 06:06	111.341	2.35824	18.5	1166.55	LI820	29.56	29.62	0.9959	1117.95	0.02788	374.135	418.321	396.985	10.1227	0.583263	Belawai
19/01/2016 06:07	111.341	2.35818	18.5	1159.23	LI820	29.55	29.58	0.9959	1108.8	0.02794	374.864	419.128	397.502	10.1162	0.57669	Belawai
19/01/2016 06:08	111.341	2.35809	18.5	1151.71	LI820	29.55	29.53	0.9959	1099.67	0.02799	375.777	420.139	398.211	10.1071	0.569768	Belawai
19/01/2016 06:09	111.34	2.35876	18.6	1139.31	LI820	29.54	29.55	0.9957	1088.89	0.028	375.411	419.734	397.573	10.1152	0.561702	Belawai
19/01/2016 06:10	111.339	2.36052	18.7	1139.31	LI820	29.55	29.67	0.9957	1093.98	0.02794	373.226	417.314	395.018	10.1479	0.566464	Belawai
19/01/2016 06:11	111.338	2.36246	18.8	1129.35	LI820	29.56	29.79	0.9957	1089.31	0.02788	371.053	414.909	392.48	10.1807	0.563255	Belawai
19/01/2016 06:12	111.337	2.36437	18.8	1134.23	LI820	29.58	29.91	0.9957	1098.62	0.02782	368.894	412.519	390.083	10.2119	0.571384	Belawai
19/01/2016 06:13	111.336	2.36625	18.9	1129.35	LI820	29.57	30.03	0.9957	1099.93	0.02777	366.748	410.143	387.578	10.2448	0.573271	Belawai
19/01/2016 06:14	111.334	2.368	19	1124.47	LI820	29.75	30.04	0.9957	1086.99	0.02778	366.57	409.946	387.143	10.2506	0.563187	Belawai
19/01/2016 06:15	111.333	2.3695	19.1	1129.35	LI820	29.88	29.88	0.9957	1077.66	0.02791	369.433	413.115	389.901	10.2143	0.556158	Belawai
19/01/2016 06:16	111.332	2.37086	19.2	1144.19	LI820	30.06	29.72	0.9957	1076.2	0.02804	372.319	416.311	392.681	10.1781	0.555567	Belawai
19/01/2016 06:17	111.33	2.37163	19.2	1144.19	LI820	30.01	29.56	0.9957	1071.16	0.02818	375.229	419.532	395.482	10.142	0.552212	Belawai
19/01/2016 06:18	111.328	2.37169	19.3	1189.11	LI820	29.83	29.4	0.9957	1114.86	0.02831	378.162	422.779	398.304	10.106	0.588798	Belawai
19/01/2016 06:19	111.327	2.37132	19.3	1296.02	LI820	29.58	29.31	0.9957	1224.04	0.02839	379.823	424.617	399.788	10.0872	0.679411	Belawai
19/01/2016 06:20	111.326	2.37074	19.4	1465.13	LI820	29.44	29.33	0.9957	1393.5	0.0284	379.453	424.208	399.145	10.0953	0.820124	Belawai
19/01/2016 06:21	111.324	2.37021	19.4	1751.11	LI820	29.38	29.35	0.9957	1671.61	0.02841	379.084	423.799	398.631	10.1018	1.05081	Belawai
19/01/2016 06:22	111.323	2.3696	19.4	1947.46	LI820	29.36	29.37	0.9957	1861.83	0.02842	378.715	423.391	397.99	10.1099	1.20943	Belawai
19/01/2016 06:23	111.321	2.36883	19.4	2081.81	LI820	29.39	29.39	0.9957	1989.57	0.02843	378.346	422.983	397.349	10.1181	1.31666	Belawai
19/01/2016 06:24	111.32	2.36813	19.5	2208.64	LI820	29.42	29.38	0.9957	2106.38	0.02846	378.531	423.187	397.286	10.1189	1.41503	Belawai
19/01/2016 06:25	111.319	2.36742	19.5	2323.08	LI820	29.49	29.32	0.9957	2203.65	0.02852	379.638	424.413	398.188	10.1074	1.49717	Belawai
19/01/2016 06:26	111.317	2.36678	19.5	2420.03	LI820	29.42	29.26	0.9955	2297.11	0.02859	380.749	425.642	399.091	10.096	1.5769	Belawai
19/01/2016 06:27	111.316	2.36598	19.5	2474.7	LI820	29.31	29.2	0.9955	2354.66	0.02865	381.863	426.875	399.996	10.0846	1.62631	Belawai
19/01/2016 06:28	111.315	2.36509	19.5	2551.74	LI820	29.28	29.14	0.9955	2424.14	0.02872	382.98	428.112	400.904	10.0731	1.68632	Belawai
19/01/2016 06:29	111.313	2.36429	19.5	2591.58	LI820	29.23	29.1	0.9955	2464.23	0.02877	383.727	428.939	401.553	10.065	1.72133	Belawai
19/01/2016 06:30	111.312	2.36335	19.5	2653.77	LI820	29.17	29.1	0.9955	2529.61	0.02879	383.727	428.939	401.295	10.0682	1.77766	Belawai
19/01/2016 06:31	111.311	2.36236	19.5	2678.57	LI820	29.2	29.1	0.9955	2550.11	0.02881	383.727	428.939	401.037	10.0715	1.7966	Belawai
19/01/2016 06:32	111.31	2.36125	19.5	2723.49	LI820	29.25	29.1	0.9955	2587.13	0.02884	383.727	428.939	400.778	10.0747	1.83003	Belawai
19/01/2016 06:33	111.309	2.35999	19.5	2738.33	LI820	29.25	29.1	0.9955	2600.96	0.02886	383.727	428.939	400.52	10.078	1.84347	Belawai
19/01/2016 06:34	111.308	2.35864	19.5	2778.17	LI820	29.22	29.17	0.9955	2650.75	0.02883	382.421	427.493	398.905	10.0983	1.88703	Belawai
19/01/2016 06:35	111.307	2.35708	19.5	2825.32	LI820	29.19	29.35	0.9955	2720.08	0.02873	379.084	423.799	395.309	10.1442	1.9472	Belawai
19/01/2016 06:36	111.308	2.35535	19.4	2880	LI820	29.17	29.53	0.9955	2795.46	0.02862	375.777	420.139	391.62	10.1918	2.01219	Belawai
19/01/2016 06:37	111.308	2.35449	19.3	2912.32	LI820	29.19	29.71	0.9955	2846.63	0.02852	372.5	416.511	387.967	10.2397	2.05761	Belawai
19/01/2016 06:38	111.308	2.35434	19.3	2947.28	LI820	29.35	29.89	0.9954	2880.52	0.02841	369.253	412.917	384.348	10.2878	2.08787	Belawai
19/01/2016 06:39	111.308	2.35418	19.3	2972.07	LI820	29.7	29.96	0.9954	2867.46	0.02839	367.998	411.527	382.798	10.3086	2.07961	Belawai
19/01/2016 06:40	111.309	2.35341	19.3	2937.32	LI820	29.88	29.86	0.9954	2799.07	0.02848	369.792	413.513	384.407	10.287	2.02412	Belawai
19/01/2016 06:41	111.31	2.35227	19.2	2929.8	LI820	29.79	29.76	0.9954	2793.79	0.02857	371.595	415.509	386.024	10.2654	2.0218	Belawai
19/01/2016 06:42	111.312	2.35111	19.1	2875.12	LI820	29.5	29.66	0.9954	2765.52	0.02867	373.407	417.515	387.774	10.2423	2.00039	Belawai
19/01/2016 06:43	111.313	2.34969	19.1	2847.68	LI820	29.32	29.56	0.9954	2749.18	0.02876	375.229	419.532	389.406	10.2208	1.98863	Belawai
19/01/2016 06:44	111.314	2.34837	19	2847.68	LI820	29.33	29.49	0.9954	2739.34	0.02883	376.509	420.949	390.476	10.2068	1.98239	Belawai
19/01/2016 06:45	111.315	2.3471	18.9	2862.72	LI820	29.42	29.47	0.9954	2740.04	0.02887	376.876	421.355	390.601	10.2051	1.98542	Belawai
19/01/2016 06:46	111.316	2.34586	18.8	2862.72	LI820	29.51	29.45	0.9954	2727.69	0.0289	377.243	421.762	390.726	10.2035	1.97668	Belawai
19/01/2016 06:47	111.317	2.34465	18.8	2862.72	LI820	29.57	29.43	0.9954	2718.07	0.02894	377.61	422.168	390.978	10.2002	1.9706	Belawai
19/01/2016 06:48	111.318	2.34335	18.7	2857.64	LI820	29.55	29.41	0.9954	2712.65	0.02898	377.978	422.576	391.103	10.1986	1.96839	Belawai
19/01/2016 06:49	111.319	2.34215	18.6	2887.52	LI820	29.47	29.42	0.9954	2752.79	0.02899	377.794	422.372	390.658	10.2044	2.00439	Belawai
19/01/2016 06:50	111.32	2.34087	18.5	2912.32	LI820	29.41	29.48	0.9954	2791.53	0.02897	376.692	421.152	389.268	10.2226	2.03962	Belawai
19/01/2016 06:51	111.321	2.33937	18.5	2919.84	LI820	29.49	29.54	0.9954	2794.9	0.02895	375.594	419.936	387.883	10.2408	2.04473	Belawai
19/01/2016 06:52	111.321	2.33754	18.4	2905	LI820	29.58	29.6	0.9954	2776.5	0.02893	374.499	418.724	386.503	10.2591	2.03123	Belawai
19/01/2016 06:53	111.321	2.33575	18.4	2857.64	LI820	29.53	29.66	0.9954	2744.38	0.02891	373.407	417.515	385.253	10.2757	2.00564	Belawai
19/01/2016 06:54	111.32	2.33421	18.3	2857.64	LI820	29.5	29.72	0.9954	2754.73	0.02889	372.319	416.311	383.882	10.294	2.01669	Belawai
19/01/2016 06:55	111.319	2.33273	18.3	2857.64	LI820	29.6	29.78	0.9954	2749.18	0.02884	371.234	415.109	382.767	10.309	2.01138	Belawai
19/01/2016 06:56	111.318	2.33157	18.3	2835.28	LI820	29.68	29.75	0.9954	2713.52	0.02883	371.776	415.709	383.701	10.2965	1.97775	Belawai
19/01/2016 06:57	111.316	2.33041	18.3	2810.48	LI820	29.75	29.67	0.9954	2673.1	0.02886	373.226	417.314	385.57	10.2715	1.94049	Belawai
19/01/2016 06:58	111.315	2.32937	18.3	2745.85	LI820	29.69	29.59	0.9954	2609.91	0.02888	374.681	418.926	387.323	10.2482	1.88358	Belawai
19/01/2016 06:59	111.313	2.32843	18.3	2738.33	LI820	29.58	29.51	0.9954	2606.43	0.0289	376.143	420.544	389.209	10.2233	1.87734	Belawai
19/01/2016 07:00	111.312	2.32758	18.3	2753.17	LI820	29.59	29.43	0.9954	2610.03	0.02893	377.61	422.168	391.105	10.1985	1.87779	Belawai
19/01/2016 07:01	111.311	2.3268	18.4	2743.21	LI820	29.6	29.43	0.9952	2600.3	0.02889	377.61	422.168	391.487	10.1936	1.8661	Belawai
19/01/2016 07:02	111.309	2.3262	18.4	2760.69	LI820	29.48	29.47	0.9952	2635.48	0.02883	376.876	421.355	390.982	10.2001	1.89322	Belawai
19/01/2016 07:03	111.308	2.32482	18.4	2715.97	LI820	29.41	29.51	0.9952	2604.4	0.02877	376.143	420.544	390.605	10.2051	1.86391	Belawai
19/01/2016 07:04	111.307	2.32291	18.3	2758.25	LI820	29.56	29.55	0.9952	2631.73	0.02871	375.411	419.734	390.228	10.21	1.88399	Belawai
19/01/2016 07:05	111.307	2.32093	18.3	2743.21	LI820	29.69	29.59	0.9952	2607.27	0.02864	374.681	418.926	389.851	10.2149	1.8597	Belawai
19/01/2016 07:06	111.306	2.31886	18.2	2753.17	LI820	29.68	29.61	0.9952	2620.77	0.02859	374.317	418.522	389.726	10.2166	1.86811	Belawai
19/01/2016 07:07	111.306	2.31678	18.1	2745.85	LI820	29.63	29.63	0.9952	2621.61	0.02854	373.953	418.119	389.726	10.2166	1.86554	Belawai
19/01/2016 07:08	111.305	2.31469	18.1	2765.77	LI820	29.61	29.65	0.9952	2645.64	0.0285	373.589	417.717	389.727	10.2166	1.88308	Belawai
19/01/2016 07:09	111.305	2.31261	18	2770.65	LI820	29.61	29.67	0.9952	2651.89	0.02845	373.226	417.314	389.727	10.2166	1.88501	Belawai
19/01/2016 07:10	111.304	2.31058	18	2750.73	LI820	29.6	29.69	0.9952	2636.77	0.0284	372.863	416.913	389.727	10.2166	1.86906	Belawai
19/01/2016 07:11	111.304	2.30848	17.9	2770.65	LI820	29.62	29.71	0.9952	2655.12	0.02835	372.5	416.511	389.601	10.2182	1.88138	Belawai
19/01/2016 07:12	111.302	2.30718	17.9	2780.61	LI820	29.66	29.73	0.995	2661.62	0.0283	372.138	416.11	389.601	10.2182	1.88354	Belawai
19/01/2016 07:13	111.3	2.30659	18	2790.57	LI820	29.7	29.75	0.995	2669.77	0.02826	371.776	415.709	389.6	10.2182	1.88766	Belawai
19/01/2016 07:14	111.298	2.30607	18	2780.61	LI820	29.66	29.77	0.995	2666.77	0.02821	371.414	415.309	389.599	10.2182	1.88183	Belawai
19/01/2016 07:15	111.295	2.30528	18.1	2768.21	LI820	29.75	29.79	0.995	2646.3	0.02816	371.053	414.909	389.598	10.2182	1.86154	Belawai
19/01/2016 07:16	111.294	2.30355	18	2788.13	LI820	29.79	29.87	0.995	2669.15	0.02808	369.612	413.314	388.467	10.2331	1.87786	Belawai
19/01/2016 07:17	111.295	2.30147	17.9	2788.13	LI820	29.83	29.97	0.995	2675.3	0.02798	367.819	411.329	386.84	10.2546	1.88018	Belawai
19/01/2016 07:18	111.296	2.29974	17.8	2725.93	LI820	29.87	30.07	0.995	2621.36	0.02788	366.036	409.355	385.344	10.2745	1.8326	Belawai
19/01/2016 07:19	111.297	2.29781	17.7	2569.22	LI820	29.97	30.17	0.995	2470.35	0.02777	364.262	407.39	383.854	10.2944	1.70457	Belawai
19/01/2016 07:20	111.298	2.29592	17.5	2442.39	LI820	30.04	30.27	0.995	2350.89	0.02767	362.496	405.436	382.371	10.3144	1.60354	Belawai
19/01/2016 07:21	111.297	2.29492	17.7	2333.03	LI820	30.14	30.3	0.995	2238.52	0.02762	361.969	404.852	382.185	10.3169	1.50881	Belawai
19/01/2016 07:22	111.296	2.29569	17.7	2245.84	LI820	30.25	30.3	0.9949	2144.49	0.02759	361.969	404.852	382.552	10.3119	1.42944	Belawai
19/01/2016 07:23	111.296	2.29593	17.7	2223.48	LI820	30.22	30.3	0.9949	2125.92	0.02755	361.969	404.852	382.798	10.3086	1.41172	Belawai
19/01/2016 07:24	111.296	2.29606	17.7	2196.24	LI820	30.2	30.3	0.9949	2101.5	0.02752	361.969	404.852	383.165	10.3037	1.38956	Belawai
19/01/2016 07:25	111.295	2.29614	17.8	2181.2	LI820	30.22	30.3	0.9949	2085.48	0.02749	361.969	404.852	383.533	10.2987	1.37432	Belawai
19/01/2016 07:26	111.295	2.29613	17.8	2144.01	LI820	30.3	30.27	0.9949	2039.6	0.02748	362.496	405.436	384.457	10.2863	1.33482	Belawai
19/01/2016 07:27	111.295	2.29606	17.8	2124.09	LI820	30.35	30.22	0.9949	2012.14	0.02747	363.378	406.412	385.756	10.269	1.30977	Belawai
19/01/2016 07:28	111.295	2.29608	17.8	2116.57	LI820	30.31	30.17	0.9949	2004.24	0.02748	364.262	407.39	386.935	10.2534	1.30184	Belawai
19/01/2016 07:29	111.295	2.29609	17.8	2126.53	LI820	30.23	30.12	0.9949	2016.5	0.0275	365.148	408.371	388.118	10.2377	1.31074	Belawai
19/01/2016 07:30	111.295	2.296	17.8	2138.92	LI820	30.17	30.07	0.9949	2030.22	0.02751	366.036	409.355	389.181	10.2237	1.32054	Belawai
19/01/2016 07:31	111.295	2.29535	17.8	2144.01	LI820	30.12	30.02	0.9949	2034.82	0.02753	366.927	410.341	390.246	10.2098	1.32342	Belawai
19/01/2016 07:32	111.293	2.29374	17.9	2144.01	LI820	30.1	29.97	0.9949	2032.13	0.02755	367.819	411.329	391.439	10.1942	1.32019	Belawai
19/01/2016 07:33	111.292	2.29224	17.9	2148.88	LI820	30.05	29.92	0.9949	2037.74	0.02757	368.715	412.321	392.511	10.1803	1.32387	Belawai
19/01/2016 07:34	111.29	2.29101	18	2134.05	LI820	29.95	29.97	0.9949	2036.88	0.02752	367.819	411.329	391.688	10.191	1.32217	Belawai
19/01/2016 07:35	111.288	2.28974	18.1	2116.57	LI820	29.94	30.09	0.9949	2031.44	0.02742	365.68	408.961	389.547	10.2189	1.31659	Belawai
19/01/2016 07:36	111.287	2.28815	18.2	2101.73	LI820	29.95	30.21	0.9949	2026.75	0.02733	363.554	406.607	387.541	10.2453	1.31187	Belawai
19/01/2016 07:37	111.285	2.28647	18.3	2054.37	LI820	29.98	30.33	0.9949	1988.61	0.02724	361.442	404.268	385.425	10.2734	1.2804	Belawai
19/01/2016 07:38	111.283	2.28491	18.4	2059.45	LI820	29.97	30.45	0.9949	2004.2	0.02714	359.342	401.944	383.321	10.3016	1.29175	Belawai
19/01/2016 07:39	111.281	2.28337	18.5	2059.45	LI820	30.21	30.45	0.9949	1982.46	0.02713	359.342	401.944	383.564	10.2983	1.27337	Belawai
19/01/2016 07:40	111.28	2.28112	18.5	2069.41	LI820	30.42	30.37	0.9949	1966.62	0.02717	360.741	403.492	385.17	10.2768	1.25985	Belawai
19/01/2016 07:41	111.28	2.27857	18.5	2069.41	LI820	30.44	30.29	0.9949	1958.68	0.0272	362.145	405.046	386.782	10.2554	1.25223	Belawai
19/01/2016 07:42	111.28	2.27595	18.5	2069.41	LI820	30.16	30.21	0.9949	1976.5	0.02724	363.554	406.607	388.402	10.234	1.26576	Belawai
19/01/2016 07:43	111.28	2.27337	18.4	2009.65	LI820	30.08	30.13	0.9949	1919.76	0.02728	364.97	408.175	390.152	10.211	1.21925	Belawai
19/01/2016 07:44	111.28	2.27072	18.4	1952.54	LI820	30.06	30.11	0.9949	1865.88	0.02728	365.325	408.568	390.653	10.2044	1.17527	Belawai
19/01/2016 07:45	111.28	2.26806	18.4	1917.58	LI820	30.05	30.13	0.9949	1834.51	0.02725	364.97	408.175	390.399	10.2078	1.14923	Belawai
19/01/2016 07:46	111.281	2.26536	18.3	1887.9	LI820	30.09	30.15	0.9949	1804.43	0.02722	364.616	407.782	390.269	10.2095	1.12408	Belawai
19/01/2016 07:47	111.281	2.26264	18.3	1887.9	LI820	30.15	30.17	0.9949	1801.43	0.02719	364.262	407.39	390.016	10.2128	1.12081	Belawai
19/01/2016 07:48	111.281	2.26002	18.2	1858.02	LI820	30.16	30.19	0.9949	1773.39	0.02717	363.908	406.999	389.762	10.2161	1.09794	Belawai
19/01/2016 07:49	111.281	2.25733	18.2	1830.58	LI820	30.14	30.27	0.9949	1754.56	0.0271	362.496	405.436	388.383	10.2342	1.08201	Belawai
19/01/2016 07:50	111.282	2.25485	18.1	1800.71	LI820	30.15	30.4	0.9949	1734.41	0.027	360.216	402.91	386.198	10.2631	1.06498	Belawai
19/01/2016 07:51	111.283	2.25222	18	1768.39	LI820	30.18	30.52	0.9949	1709.99	0.02691	358.124	400.594	384.091	10.2912	1.04486	Belawai
19/01/2016 07:52	111.283	2.24966	18	1718.79	LI820	30.19	30.65	0.9949	1670.02	0.02681	355.873	398.102	381.813	10.3219	1.01222	Belawai
19/01/2016 07:53	111.283	2.24715	17.9	1641.56	LI820	30.27	30.77	0.9949	1597.49	0.02672	353.809	395.816	379.853	10.3485	0.953665	Belawai
19/01/2016 07:54	111.283	2.24465	17.9	1564.52	LI820	30.59	30.77	0.9949	1500.3	0.02671	353.809	395.816	379.973	10.3469	0.875801	Belawai
19/01/2016 07:55	111.283	2.24218	17.8	1395.41	LI820	30.75	30.73	0.9949	1326.86	0.02673	354.496	396.576	380.826	10.3353	0.737481	Belawai
19/01/2016 07:56	111.284	2.23956	17.8	1276.1	LI820	30.79	30.69	0.9949	1209.15	0.02674	355.184	397.338	381.681	10.3237	0.643346	Belawai
19/01/2016 07:57	111.284	2.2369	17.8	1181.59	LI820	30.75	30.65	0.9949	1119.87	0.02676	355.873	398.102	382.537	10.3121	0.572151	Belawai
19/01/2016 07:58	111.283	2.23432	17.7	1126.91	LI820	30.64	30.61	0.9949	1071.3	0.02677	356.564	398.867	383.396	10.3006	0.533152	Belawai
19/01/2016 07:59	111.283	2.23171	17.7	1079.55	LI820	30.68	30.62	0.9949	1024.9	0.02675	356.391	398.675	383.332	10.3014	0.495974	Belawai
19/01/2016 08:00	111.283	2.22914	17.7	1042.36	LI820	30.64	30.64	0.9949	992.29	0.02673	356.046	398.293	383.084	10.3048	0.469895	Belawai
19/01/2016 08:01	111.283	2.22655	17.7	1012.48	LI820	30.58	30.66	0.9949	967.19	0.02671	355.7	397.911	382.836	10.3081	0.449792	Belawai
19/01/2016 08:02	111.283	2.22396	17.6	1012.48	LI820	30.52	30.68	0.9949	970.76	0.02668	355.356	397.529	382.587	10.3114	0.452261	Belawai
19/01/2016 08:03	111.283	2.22135	17.6	1020	LI820	30.48	30.7	0.9949	980.37	0.02666	355.011	397.147	382.34	10.3148	0.45968	Belawai
19/01/2016 08:04	111.283	2.21875	17.6	1020	LI820	30.63	30.68	0.9949	973.1	0.02665	355.356	397.529	382.828	10.3082	0.453462	Belawai
19/01/2016 08:05	111.283	2.21612	17.5	1012.48	LI820	30.69	30.66	0.9949	962.7	0.02666	355.7	397.911	383.318	10.3016	0.445116	Belawai
19/01/2016 08:06	111.284	2.21344	17.5	1007.4	LI820	30.64	30.64	0.9949	959.4	0.02666	356.046	398.293	383.808	10.295	0.442224	Belawai
19/01/2016 08:07	111.284	2.21069	17.4	1012.48	LI820	30.62	30.62	0.9949	964.05	0.02666	356.391	398.675	384.299	10.2885	0.445614	Belawai
19/01/2016 08:08	111.283	2.20793	17.4	1012.48	LI820	30.62	30.6	0.9949	963.1	0.02666	356.737	399.058	384.79	10.2819	0.44458	Belawai
19/01/2016 08:09	111.283	2.20542	17.4	1012.48	LI820	30.63	30.55	0.9949	960.73	0.02668	357.603	400.017	385.839	10.2679	0.442438	Belawai
19/01/2016 08:10	111.282	2.20305	17.5	1012.48	LI820	30.58	30.49	0.9949	960.66	0.02671	358.646	401.172	387.077	10.2515	0.442171	Belawai
19/01/2016 08:11	111.28	2.20117	17.6	1017.35	LI820	30.5	30.43	0.9955	966.63	0.02673	359.691	402.33	388.32	10.235	0.446308	Belawai
19/01/2016 08:12	111.278	2.19956	17.7	1042.36	LI820	30.09	30.37	0.9958	1007.07	0.02676	360.741	403.492	389.567	10.2187	0.477846	Belawai
19/01/2016 08:13	111.276	2.19812	17.8	1024.88	LI820	29.85	30.31	0.9949	996.83	0.02679	361.793	404.657	390.818	10.2023	0.46984	Belawai
19/01/2016 08:14	111.273	2.19695	17.9	1014.92	LI820	29.8	30.3	0.9952	989.48	0.02678	361.969	404.852	391.129	10.1982	0.463602	Belawai
19/01/2016 08:15	111.271	2.19577	18.1	1002.52	LI820	30.03	30.3	0.9948	966.59	0.02677	361.969	404.852	391.252	10.1966	0.445488	Belawai
19/01/2016 08:16	111.268	2.1948	18.2	1002.52	LI820	30.14	30.3	0.9948	962.24	0.02676	361.969	404.852	391.374	10.195	0.441834	Belawai
19/01/2016 08:17	111.265	2.19403	18.4	985.037	LI820	29.98	30.3	0.9948	952.11	0.02675	361.969	404.852	391.497	10.1934	0.433644	Belawai
19/01/2016 08:18	111.263	2.19358	18.6	985.037	LI820	29.94	30.3	0.9948	953.91	0.02674	361.969	404.852	391.619	10.1918	0.434827	Belawai
19/01/2016 08:19	111.26	2.19335	18.7	985.037	LI820	30.18	30.24	0.9948	941.12	0.02677	363.025	406.021	392.877	10.1755	0.424584	Belawai
19/01/2016 08:20	111.257	2.19324	18.9	997.639	LI820	30.3	30.16	0.9948	944.66	0.0268	364.439	407.586	394.519	10.1543	0.426949	Belawai
19/01/2016 08:21	111.255	2.19349	19.1	997.639	LI820	30.33	30.08	0.9948	940.66	0.02684	365.858	409.158	396.168	10.1332	0.423562	Belawai
19/01/2016 08:22	111.252	2.19435	19.3	1002.52	LI820	30.31	30	0.9948	942.6	0.02688	367.283	410.736	397.824	10.112	0.424828	Belawai
19/01/2016 08:23	111.25	2.19592	19.4	1007.4	LI820	30.23	29.92	0.9948	947.75	0.02692	368.715	412.321	399.488	10.091	0.428602	Belawai
19/01/2016 08:24	111.249	2.19755	19.5	994.996	LI820	30.09	29.92	0.9948	941.85	0.02691	368.715	412.321	399.613	10.0894	0.423763	Belawai
19/01/2016 08:25	111.248	2.19935	19.6	957.801	LI820	29.94	29.94	0.9948	913.46	0.02689	368.356	411.924	399.351	10.0927	0.401396	Belawai
19/01/2016 08:26	111.246	2.20137	19.7	935.442	LI820	29.95	29.96	0.9948	892.46	0.02686	367.998	411.527	399.091	10.096	0.384679	Belawai
19/01/2016 08:27	111.245	2.20339	19.8	905.564	LI820	29.96	29.98	0.9948	864.15	0.02684	367.641	411.132	398.83	10.0993	0.362417	Belawai
19/01/2016 08:28	111.243	2.20512	20	880.563	LI820	29.99	30	0.9948	840.03	0.02681	367.283	410.736	398.569	10.1026	0.343316	Belawai
19/01/2016 08:29	111.242	2.2071	20.1	860.847	LI820	29.99	30	0.9947	821.21	0.0268	367.283	410.736	398.693	10.101	0.328493	Belawai
19/01/2016 08:30	111.24	2.20931	20.2	853.327	LI820	29.98	30	0.9947	814.37	0.02679	367.283	410.736	398.818	10.0994	0.322989	Belawai
19/01/2016 08:31	111.239	2.21155	20.3	843.367	LI820	29.99	30	0.9947	804.62	0.02678	367.283	410.736	398.942	10.0979	0.315225	Belawai
19/01/2016 08:32	111.238	2.21372	20.4	848.245	LI820	30.03	30.06	0.9947	809.97	0.02673	366.214	409.552	397.789	10.1125	0.319257	Belawai
19/01/2016 08:33	111.236	2.21587	20.5	843.367	LI820	30.04	30.16	0.9947	808.22	0.02667	364.439	407.586	395.875	10.1369	0.317947	Belawai
19/01/2016 08:34	111.235	2.21805	20.6	838.286	LI820	30.14	30.26	0.9947	803.21	0.0266	362.673	405.631	394.093	10.1598	0.313929	Belawai
19/01/2016 08:35	111.234	2.22017	20.8	845.806	LI820	30.27	30.36	0.9947	809.15	0.02654	360.916	403.686	392.199	10.1843	0.3186	Belawai
19/01/2016 08:36	111.232	2.22225	20.9	840.928	LI820	30.38	30.46	0.9947	803.99	0.02648	359.168	401.75	390.314	10.2089	0.314629	Belawai
19/01/2016 08:37	111.231	2.22445	21	825.887	LI820	30.41	30.49	0.9947	789.27	0.02646	358.646	401.172	389.751	10.2162	0.303159	Belawai
19/01/2016 08:38	111.23	2.22666	21.1	818.57	LI820	30.48	30.47	0.9947	779.23	0.02647	358.994	401.558	390.126	10.2113	0.295312	Belawai
19/01/2016 08:39	111.228	2.22887	21.2	805.968	LI820	30.45	30.45	0.9947	767.5	0.02648	359.342	401.944	390.502	10.2064	0.286151	Belawai
19/01/2016 08:40	111.227	2.23103	21.3	796.008	LI820	30.44	30.43	0.9947	757.81	0.02649	359.691	402.33	390.878	10.2015	0.27858	Belawai
19/01/2016 08:41	111.227	2.23142	21.3	791.13	LI820	30.41	30.41	0.9947	753.33	0.02651	360.041	402.717	391.255	10.1966	0.275168	Belawai
19/01/2016 08:42	111.226	2.23167	21.3	781.171	LI820	30.48	30.4	0.9947	741.28	0.02651	360.216	402.91	391.444	10.1941	0.265723	Belawai
19/01/2016 08:43	111.226	2.232	21.3	776.292	LI820	30.47	30.4	0.9947	737.22	0.02651	360.216	402.91	391.444	10.1941	0.262563	Belawai
19/01/2016 08:44	111.225	2.23405	21.4	776.292	LI820	30.42	30.4	0.9947	739.04	0.02651	360.216	402.91	391.444	10.1941	0.26398	Belawai
19/01/2016 08:45	111.224	2.23557	21.4	776.292	LI820	30.43	30.4	0.9947	738.65	0.02651	360.216	402.91	391.444	10.1941	0.263676	Belawai

## Sheet: Jan2016_O2
Time	Longitude	Latitude	Salinity	T (deg C)	O2 (mg/L)	O2 (sat, %)	Location
15/01/2016 23:19	111.576	2.19155	0	28	4.21	52.0684	Rajang
15/01/2016 23:22	111.576	2.19155	0	28.1	4.12	51.034	Rajang
15/01/2016 23:27	111.576	2.19155	0	28.1	4.16	51.5294	Rajang
15/01/2016 23:32	111.576	2.19155	0	28.1	4.14	51.2817	Rajang
15/01/2016 23:37	111.576	2.19155	0	28.1	4.14	51.2817	Rajang
15/01/2016 23:42	111.576	2.19155	0	28.1	4.19	51.901	Rajang
15/01/2016 23:47	111.579	2.19082	0	28	4.16	51.4486	Rajang
15/01/2016 23:52	111.59	2.18539	0	28	4.2	51.9373	Rajang
15/01/2016 23:57	111.595	2.17206	0	28	4.24	52.432	Rajang
16/01/2016 00:02	111.602	2.16108	0	28	4.27	52.8018	Rajang
16/01/2016 00:07	111.617	2.16216	0	28	4.34	53.6596	Rajang
16/01/2016 00:12	111.629	2.16902	0	28	4.39	54.2711	Rajang
16/01/2016 00:17	111.635	2.18041	0	27.9	4.5	55.5448	Rajang
16/01/2016 00:22	111.639	2.1892	0	27.9	4.73	58.3811	Rajang
16/01/2016 00:52	111.663	2.24197	0	27.7	5.29	65.0735	Rajang
16/01/2016 00:57	111.667	2.25076	0	27.7	5.27	64.8246	Rajang
16/01/2016 01:02	111.671	2.25956	0	27.6	5.4	66.3175	Rajang
16/01/2016 01:07	111.673	2.26987	0	27.6	5.39	66.1897	Rajang
16/01/2016 01:12	111.674	2.28242	0	27.6	5.43	66.6739	Main stem
16/01/2016 01:17	111.682	2.28923	0	27.6	5.48	67.2879	Main stem
16/01/2016 01:22	111.696	2.28795	0	27.6	5.59	68.6386	Main stem
16/01/2016 01:27	111.708	2.28373	0	27.7	5.56	68.3789	Main stem
16/01/2016 01:47	111.743	2.27242	0	27.7	5.54	68.1366	Main stem
16/01/2016 01:52	111.748	2.27047	0	27.7	5.54	68.1347	Main stem
16/01/2016 01:57	111.754	2.26853	0	27.7	5.51	67.7638	Main stem
16/01/2016 02:47	111.809	2.24905	0	27.6	5.54	68.008	Main stem
16/01/2016 02:49	111.81	2.24854	0	27.6	5.53	67.8847	Main stem
16/01/2016 02:54	111.816	2.24659	0	27.6	5.51	67.6373	Main stem
16/01/2016 02:59	111.818	2.24636	0	27.6	5.52	67.7593	Main stem
16/01/2016 03:04	111.815	2.25125	0	27.6	5.56	68.2561	Main stem
16/01/2016 03:09	111.81	2.26164	0	27.6	5.57	68.3887	Main stem
16/01/2016 03:14	111.81	2.27437	0	27.6	5.62	69.0069	Main stem
16/01/2016 03:19	111.817	2.28339	0	27.6	5.64	69.2579	Main stem
16/01/2016 03:24	111.827	2.28367	0	27.7	5.78	71.0927	Main stem
16/01/2016 03:29	111.834	2.27595	0	27.7	5.85	71.9536	Main stem
16/01/2016 03:34	111.836	2.26458	0	27.6	5.88	72.2116	Main stem
16/01/2016 03:39	111.834	2.25269	0	27.6	5.88	72.2118	Main stem
16/01/2016 03:44	111.836	2.24255	0	27.6	6.24	76.6359	Main stem
16/01/2016 03:49	111.844	2.23652	0	27.6	6.02	73.94	Main stem
16/01/2016 03:54	111.85	2.23456	0	27.6	5.97	73.3258	Main stem
16/01/2016 03:59	111.849	2.23449	0	27.7	5.95	73.194	Main stem
16/01/2016 04:03	111.848	2.23443	0	27.6	5.95	73.0802	Main stem
16/01/2016 04:08	111.847	2.23436	0	27.6	5.92	72.7117	Main stem
16/01/2016 04:13	111.846	2.23432	0	27.6	5.92	72.7117	Main stem
16/01/2016 04:18	111.846	2.23433	0	27.7	5.98	73.5631	Main stem
16/01/2016 04:23	111.846	2.23408	0	27.8	5.96	73.4334	Main stem
16/01/2016 04:28	111.848	2.23381	0	27.7	6.02	74.0657	Main stem
16/01/2016 04:33	111.851	2.23404	0	27.7	5.95	73.2045	Main stem
16/01/2016 04:38	111.857	2.23378	0	27.7	6.01	73.9439	Main stem
16/01/2016 05:38	111.948	2.17599	0	27.9	6.27	77.4597	Main stem
16/01/2016 05:43	111.949	2.17555	0	28.2	6.31	78.3146	Main stem
16/01/2016 05:48	111.95	2.17511	0	27.9	6.26	77.3346	Main stem
16/01/2016 05:53	111.951	2.17468	0	27.9	6.28	77.5809	Main stem
16/01/2016 05:58	111.953	2.17424	0	27.8	6.27	77.3367	Main stem
16/01/2016 06:03	111.954	2.1738	0	27.9	6.37	78.6912	Main stem
16/01/2016 06:08	111.955	2.17337	0	28.2	6.37	79.0553	Main stem
16/01/2016 06:13	111.956	2.17293	0	28	6.31	78.069	Main stem
16/01/2016 06:18	111.958	2.17249	0	27.9	6.27	77.4536	Main stem
16/01/2016 06:23	111.959	2.17205	0	27.9	6.26	77.3293	Main stem
16/01/2016 06:28	111.96	2.17162	0	27.9	6.27	77.452	Main stem
16/01/2016 06:33	111.961	2.17118	0	27.9	6.26	77.3277	Main stem
16/01/2016 06:38	111.962	2.17074	0	27.9	6.25	77.2034	Main stem
16/01/2016 06:43	111.964	2.1703	0	27.9	6.25	77.2027	Main stem
16/01/2016 06:48	111.965	2.16987	0	27.9	6.26	77.3254	Main stem
16/01/2016 06:53	111.966	2.16943	0	28.6	7.5	93.642	Main stem
16/01/2016 06:58	111.967	2.16899	0	28.9	7.46	93.5664	Main stem
16/01/2016 07:03	111.969	2.16856	0	29.1	7.42	93.3449	Main stem
16/01/2016 07:08	111.97	2.16812	0	29.3	7.39	93.2459	Main stem
16/01/2016 07:13	111.971	2.16768	0	29.3	7.38	93.1188	Main stem
16/01/2016 07:18	111.972	2.16724	0	29.4	7.39	93.3836	Main stem
16/01/2016 07:23	111.973	2.16681	0	29.5	7.36	93.1424	Main stem
16/01/2016 07:28	111.975	2.16637	0	29.5	7.36	93.1414	Main stem
16/01/2016 07:33	111.976	2.16593	0	29.5	7.37	93.2671	Main stem
16/01/2016 07:38	111.977	2.16549	0	29.5	7.36	93.1396	Main stem
16/01/2016 07:43	111.978	2.16506	0	29.5	7.36	93.1387	Main stem
16/01/2016 07:48	111.98	2.16462	0	29.5	7.35	93.0112	Main stem
16/01/2016 07:53	111.981	2.16418	0	29.6	7.35	93.1488	Main stem
16/01/2016 07:58	111.982	2.16375	0	29.6	7.35	93.1478	Main stem
16/01/2016 08:03	111.983	2.16331	0	29.6	7.35	93.1469	Main stem
16/01/2016 08:08	111.984	2.16287	0	29.7	7.35	93.2844	Main stem
16/01/2016 08:13	111.986	2.16243	0	30.1	7.27	92.8142	Main stem
16/01/2016 08:18	111.987	2.162	0	30.7	7.19	92.5982	Main stem
16/01/2016 08:23	111.988	2.16156	0	30.9	7.17	92.6066	Main stem
16/01/2016 08:28	111.989	2.16112	0	30.9	7.18	92.7349	Main stem
16/01/2016 08:33	111.991	2.16068	0	31.3	7.13	92.6175	Main stem
16/01/2016 08:38	111.992	2.16025	0	31.5	7.1	92.4896	Main stem
16/01/2016 08:43	111.993	2.15981	0	31.2	7.15	92.7429	Main stem
16/01/2016 08:48	111.994	2.15937	0	31.3	7.13	92.6147	Main stem
16/01/2016 08:53	111.996	2.15894	0	31.4	7.1	92.3555	Main stem
16/01/2016 08:58	111.997	2.1585	0	31.2	7.12	92.3511	Main stem
16/01/2016 09:03	111.998	2.15806	0	31	7.15	92.4739	Main stem
16/01/2016 09:08	111.999	2.15762	0	30.9	7.17	92.5984	Main stem
16/01/2016 09:13	112	2.15719	0	30.8	7.17	92.4641	Main stem
16/01/2016 09:18	112.002	2.15675	0	30.7	7.19	92.5872	Main stem
16/01/2016 09:23	112.003	2.15631	0	30.6	7.23	92.9666	Main stem
16/01/2016 22:48	112.2	2.0859	0	25.8	7.89	94.0874	Main stem
16/01/2016 22:53	112.202	2.08546	0	25.8	7.84	93.4903	Main stem
16/01/2016 22:58	112.203	2.08502	0	25.9	7.83	93.5218	Main stem
16/01/2016 23:03	112.204	2.08458	0	27.8	7.36	90.5971	Main stem
16/01/2016 23:08	112.205	2.08415	0	27.8	6.33	77.9176	Main stem
16/01/2016 23:13	112.206	2.08371	0	27.8	6.92	85.1793	Main stem
16/01/2016 23:18	112.208	2.08327	0	27.8	6.24	76.8083	Main stem
16/01/2016 23:23	112.209	2.08284	0	27.8	6.24	76.8075	Main stem
16/01/2016 23:28	112.21	2.0824	0	27.8	6.23	76.6837	Main stem
16/01/2016 23:33	112.211	2.08196	0	27.8	6.23	76.6829	Main stem
16/01/2016 23:38	112.213	2.08152	0	27.8	6.22	76.5591	Main stem
16/01/2016 23:44	112.214	2.08102	0	27.8	7.57	93.1745	Main stem
16/01/2016 23:54	112.216	2.08014	0	27.7	7.71	94.7486	Main stem
17/01/2016 00:04	112.219	2.07927	0	27.8	6.17	75.9398	Main stem
17/01/2016 00:09	112.22	2.07883	0	27.8	6.14	75.5698	Main stem
17/01/2016 00:14	112.221	2.07839	0	27.8	7.81	96.1228	Main stem
17/01/2016 00:19	112.223	2.07796	0	27.8	6.13	75.4452	Main stem
17/01/2016 00:24	112.224	2.07752	0	27.8	6.14	75.5676	Main stem
17/01/2016 00:29	112.225	2.07708	0	27.8	6.12	75.3207	Main stem
17/01/2016 00:34	112.23	2.07491	0	27.8	6.13	75.4435	Main stem
17/01/2016 00:39	112.238	2.07226	0	27.8	6.14	75.5554	Main stem
17/01/2016 00:44	112.244	2.06736	0	27.8	6.16	75.8015	Main stem
17/01/2016 00:49	112.252	2.06303	0	27.8	6.18	76.0476	Main stem
17/01/2016 00:54	112.261	2.06167	0	27.7	6.18	75.9296	Main stem
17/01/2016 00:59	112.269	2.06343	0	27.7	6.2	76.1645	Main stem
17/01/2016 01:04	112.276	2.06196	0	27.7	6.22	76.4102	Main stem
17/01/2016 01:09	112.282	2.05964	0	27.7	6.22	76.4102	Main stem
17/01/2016 01:14	112.29	2.05728	0	27.7	6.27	77.0244	Main stem
17/01/2016 01:19	112.298	2.05581	0	27.7	6.27	77.013	Main stem
17/01/2016 01:24	112.306	2.05478	0	27.6	6.29	77.1384	Main stem
17/01/2016 01:29	112.315	2.05601	0	27.6	6.31	77.3837	Main stem
17/01/2016 01:34	112.321	2.05697	0	27.6	6.32	77.5064	Main stem
17/01/2016 01:39	112.33	2.0558	0	27.6	6.34	77.7632	Main stem
17/01/2016 01:44	112.338	2.05249	0	27.5	6.36	77.8868	Main stem
17/01/2016 02:15	112.358	2.04258	0	27.5	6.36	77.8753	Main stem
17/01/2016 02:20	112.366	2.04022	0	27.5	6.36	77.8753	Main stem
17/01/2016 02:25	112.373	2.0383	0	27.5	6.35	77.7528	Main stem
17/01/2016 02:30	112.381	2.03604	0	27.5	6.35	77.7528	Main stem
17/01/2016 02:35	112.389	2.03279	0	27.5	6.35	77.7528	Main stem
17/01/2016 04:34	112.529	2.01655	0	27.6	6.39	78.5017	Main stem
17/01/2016 04:39	112.537	2.01535	0	27.6	6.39	78.5129	Main stem
17/01/2016 04:44	112.544	2.01308	0	27.7	6.45	79.3854	Main stem
17/01/2016 04:49	112.551	2.01191	0	27.7	6.43	79.1505	Main stem
17/01/2016 04:54	112.559	2.01174	0	27.7	6.42	79.0387	Main stem
17/01/2016 04:59	112.567	2.0111	0	27.7	6.5	80.0236	Main stem
17/01/2016 05:04	112.574	2.00962	0	27.7	6.45	79.4198	Main stem
17/01/2016 05:09	112.582	2.00892	0	27.8	6.49	80.0365	Main stem
17/01/2016 05:39	112.625	2.00987	0	27.8	6.5	80.2181	Main stem
17/01/2016 05:44	112.628	2.01011	0	27.8	6.54	80.7232	Main stem
17/01/2016 05:49	112.636	2.01099	0	27.8	6.57	81.1056	Main stem
17/01/2016 05:54	112.642	2.01048	0	27.8	6.56	80.9937	Main stem
17/01/2016 05:59	112.649	2.0093	0	27.8	6.52	80.5118	Main stem
17/01/2016 06:04	112.647	2.00974	0	27.8	6.44	79.5353	Main stem
17/01/2016 06:14	112.637	2.01085	0	27.8	6.44	79.5472	Main stem
17/01/2016 06:19	112.633	2.01064	0	27.9	6.43	79.5468	Main stem
17/01/2016 06:24	112.636	2.01072	0	27.9	6.48	80.1768	Main stem
17/01/2016 06:29	112.643	2.01025	0	27.9	6.52	80.6833	Main stem
17/01/2016 06:34	112.65	2.01036	0	27.8	6.58	81.3118	Main stem
17/01/2016 06:39	112.658	2.01075	0	27.9	6.58	81.4379	Main stem
17/01/2016 06:44	112.665	2.01133	0	27.9	6.67	82.5636	Main stem
17/01/2016 06:49	112.672	2.01	0	27.9	6.78	83.9377	Main stem
17/01/2016 06:54	112.678	2.00845	0	27.9	6.73	83.3187	Main stem
17/01/2016 06:59	112.685	2.00867	0	27.9	6.91	85.5594	Main stem
17/01/2016 07:24	112.722	2.01149	0	27.7	7.09	87.5543	Main stem
17/01/2016 07:29	112.729	2.01362	0	27.7	7.11	87.8012	Main stem
17/01/2016 07:34	112.736	2.01379	0	27.7	7.13	88.0482	Main stem
17/01/2016 07:39	112.744	2.01258	0	27.7	7.14	88.1717	Main stem
17/01/2016 07:44	112.752	2.01222	0	27.7	7.13	88.0482	Main stem
17/01/2016 07:49	112.756	2.01261	0	27.7	7.17	88.5422	Main stem
17/01/2016 07:54	112.764	2.01388	0	27.6	7.16	88.2812	Main stem
17/01/2016 07:59	112.772	2.01471	0	27.5	7.19	88.5128	Main stem
17/01/2016 08:04	112.781	2.01442	0	27.5	7.18	88.3897	Main stem
17/01/2016 08:09	112.787	2.01392	0	27.4	7.22	88.7432	Main stem
17/01/2016 08:24	112.807	2.01223	0	27.3	7.6	93.2476	Main stem
17/01/2016 08:29	112.815	2.01297	0	27.3	7.65	93.8471	Main stem
17/01/2016 08:34	112.822	2.01292	0	27.2	7.6	93.074	Main stem
17/01/2016 08:39	112.829	2.01304	0	27.2	7.74	94.7885	Main stem
17/01/2016 08:44	112.834	2.01431	0	27.2	6.63	81.2064	Main stem
17/01/2016 08:47	112.833	2.01477	0	27.2	6.59	80.7165	Main stem
17/01/2016 08:52	112.831	2.01451	0	27.2	6.69	81.9296	Main stem
17/01/2016 08:57	112.836	2.01358	0	27.2	6.62	81.0487	Main stem
17/01/2016 09:02	112.843	2.01242	0	27.2	6.74	82.5178	Main stem
17/01/2016 09:07	112.851	2.01362	0	27.2	6.85	83.8645	Main stem
17/01/2016 09:12	112.86	2.01405	0	27.1	7.39	90.3135	Main stem
17/01/2016 09:17	112.867	2.01373	0	27.1	7.12	87.0172	Main stem
17/01/2016 09:22	112.874	2.01561	0	27.1	7.07	86.4279	Main stem
17/01/2016 09:27	112.882	2.01706	0	27.1	7.01	85.6945	Main stem
17/01/2016 09:32	112.891	2.01767	0	27.1	7.07	86.4156	Main stem
17/01/2016 09:37	112.899	2.01838	0	27.1	7.62	93.1382	Main stem
17/01/2016 09:42	112.906	2.01932	0	27	7.39	90.1844	Main stem
17/01/2016 09:47	112.915	2.01905	0	27	7.13	86.9985	Main stem
17/01/2016 09:52	112.922	2.01878	0	27	7.74	94.4416	Main stem
17/01/2016 09:57	112.926	2.01915	0	27	7.18	87.5961	Main stem
17/01/2016 22:59	112.898	2.01786	0	26.9	6.84	83.1303	Main stem
17/01/2016 23:04	112.884	2.01692	0	26.9	6.83	83.0069	Main stem
17/01/2016 23:09	112.87	2.01638	0	26.9	6.83	82.9951	Main stem
17/01/2016 23:14	112.856	2.01584	0	26.9	6.83	82.9951	Main stem
17/01/2016 23:19	112.841	2.0153	0	26.9	6.8	82.6183	Main stem
17/01/2016 23:24	112.827	2.01476	0	26.9	6.8	82.6183	Main stem
17/01/2016 23:29	112.813	2.01422	0	26.9	6.78	82.3753	Main stem
17/01/2016 23:34	112.799	2.01367	0	26.9	6.78	82.3636	Main stem
17/01/2016 23:40	112.783	2.01303	0	26.9	6.75	81.9991	Main stem
17/01/2016 23:45	112.769	2.01249	0	26.9	6.74	81.866	Main stem
17/01/2016 23:50	112.755	2.01195	0	26.9	6.73	81.7324	Main stem
17/01/2016 23:55	112.741	2.01141	0	26.8	6.75	81.8337	Main stem
18/01/2016 00:00	112.727	2.01087	0	26.8	6.73	81.5791	Main stem
18/01/2016 00:05	112.713	2.01033	0	26.8	6.71	81.3366	Main stem
18/01/2016 00:10	112.699	2.00978	0	26.8	6.69	81.0827	Main stem
18/01/2016 00:15	112.684	2.00892	0	26.8	6.68	80.9494	Main stem
18/01/2016 00:20	112.67	2.01031	0	26.9	6.69	81.1993	Main stem
18/01/2016 00:25	112.656	2.01021	0	26.9	6.65	80.7023	Main stem
18/01/2016 00:30	112.642	2.01	0	26.9	6.62	80.3295	Main stem
18/01/2016 00:35	112.627	2.00979	0	26.9	6.61	80.2055	Main stem
18/01/2016 01:00	112.556	2.01214	0	26.9	6.54	79.333	Main stem
18/01/2016 01:05	112.542	2.01399	0	26.9	6.52	79.0904	Main stem
18/01/2016 01:10	112.528	2.01695	0	26.9	6.52	79.0904	Main stem
18/01/2016 01:15	112.514	2.01994	0	26.9	6.51	78.9691	Main stem
18/01/2016 01:20	112.5	2.02294	0	26.9	6.52	79.0904	Main stem
18/01/2016 01:25	112.486	2.02593	0	26.9	6.55	79.4544	Main stem
18/01/2016 01:30	112.472	2.02906	0	26.9	6.51	78.9691	Main stem
18/01/2016 01:35	112.458	2.03065	0	26.9	6.47	78.4839	Main stem
18/01/2016 01:40	112.443	2.03215	0	27	6.5	78.9727	Main stem
18/01/2016 01:45	112.428	2.03225	0	27	6.45	78.3652	Main stem
18/01/2016 01:49	112.416	2.02974	0	27	6.46	78.4977	Main stem
18/01/2016 01:54	112.403	2.02494	0	27	6.41	77.8903	Main stem
18/01/2016 01:59	112.39	2.03162	0	27	6.46	78.4979	Main stem
18/01/2016 02:04	112.377	2.0374	0	27	6.46	78.4869	Main stem
18/01/2016 02:09	112.363	2.04055	0	27	6.39	77.6362	Main stem
18/01/2016 02:14	112.349	2.0464	0	27.1	6.35	77.2722	Main stem
18/01/2016 02:19	112.337	2.05485	0	27	6.36	77.2828	Main stem
18/01/2016 02:24	112.323	2.05772	0	27.1	6.31	76.7963	Main stem
18/01/2016 02:29	112.31	2.05703	0	27.1	6.29	76.5529	Main stem
18/01/2016 02:34	112.297	2.0582	0	27.1	6.26	76.1878	Main stem
18/01/2016 02:39	112.284	2.06055	0	27.1	6.25	76.0774	Main stem
18/01/2016 02:48	112.266	2.06283	0	27.2	6.22	75.8316	Main stem
18/01/2016 02:53	112.253	2.06371	0	27.2	6.22	75.8316	Main stem
18/01/2016 02:58	112.241	2.06997	0	27.2	6.22	75.8424	Main stem
18/01/2016 03:03	112.228	2.07581	0	27.2	6.19	75.4873	Main stem
18/01/2016 03:08	112.216	2.08322	0	27.2	6.25	76.219	Main stem
18/01/2016 03:13	112.207	2.07464	0	27.3	6.26	76.4724	Main stem
18/01/2016 03:18	112.197	2.07512	0	27.3	6.22	75.9837	Main stem
18/01/2016 03:23	112.186	2.08164	0	27.3	6.15	75.1297	Main stem
18/01/2016 03:28	112.173	2.08183	0	27.3	6.13	74.895	Main stem
18/01/2016 03:33	112.164	2.09174	0	27.3	6.14	75.0283	Main stem
18/01/2016 03:38	112.16	2.10406	0	27.3	6.15	75.1612	Main stem
18/01/2016 03:43	112.16	2.11856	0	27.4	6.11	74.7895	Main stem
18/01/2016 03:47	112.157	2.1314	0	27.3	6.26	76.5055	Main stem
18/01/2016 03:52	112.148	2.13664	0	27.4	6.2	75.8803	Main stem
18/01/2016 03:57	112.136	2.13046	0	27.5	6.18	75.7539	Main stem
18/01/2016 04:02	112.124	2.12716	0	27.6	6.09	74.778	Main stem
18/01/2016 04:07	112.113	2.13213	0	27.5	6.1	74.784	Main stem
18/01/2016 04:12	112.102	2.13908	0	27.6	6.11	75.0347	Main stem
18/01/2016 04:17	112.089	2.13981	0	27.7	6.13	75.4071	Main stem
18/01/2016 04:22	112.076	2.13743	0	27.8	6.11	75.2791	Main stem
18/01/2016 04:27	112.063	2.14082	0	27.7	6.09	74.9257	Main stem
18/01/2016 04:32	112.052	2.14553	0	27.8	6.1	75.1666	Main stem
18/01/2016 04:37	112.04	2.15041	0	27.8	6.09	75.0545	Main stem
18/01/2016 04:42	112.033	2.15311	0	27.9	6.12	75.552	Main stem
18/01/2016 04:48	112.021	2.15569	0	27.9	6.07	74.9459	Main stem
18/01/2016 04:53	112.009	2.15626	0	27.9	6.06	74.8224	Main stem
18/01/2016 05:13	111.964	2.14497	0	28.1	6.02	74.5863	Main stem
18/01/2016 05:18	111.956	2.1539	0	28	5.95	73.6098	Main stem
18/01/2016 05:23	111.951	2.16402	0	28.1	5.97	73.9712	Main stem
18/01/2016 05:28	111.946	2.17413	0	27.9	5.94	73.3665	Main stem
18/01/2016 05:33	111.94	2.1839	0	27.9	5.93	73.2386	Main stem
18/01/2016 05:38	111.932	2.19187	0	28	5.91	73.1106	Main stem
18/01/2016 05:43	111.923	2.19872	0	28	5.86	72.4964	Main stem
18/01/2016 05:48	111.915	2.20604	0	28	5.88	72.7542	Main stem
18/01/2016 05:54	111.906	2.21546	0	28.1	5.85	72.4947	Main stem
18/01/2016 05:59	111.898	2.2225	0	28	5.81	71.8988	Main stem
18/01/2016 06:04	111.89	2.22924	0	28.1	5.85	72.5055	Main stem
18/01/2016 06:09	111.879	2.23324	0	28	5.81	71.8988	Main stem
18/01/2016 06:14	111.868	2.23446	0	28.2	5.84	72.5061	Main stem
18/01/2016 06:19	111.857	2.23557	0	28.1	5.77	71.5348	Main stem
18/01/2016 06:24	111.846	2.23669	0	28	5.77	71.4271	Main stem
18/01/2016 06:29	111.836	2.24081	0	28	5.68	70.3206	Main stem
18/01/2016 06:34	111.834	2.25037	0	28.2	5.69	70.6722	Main stem
18/01/2016 06:42	111.837	2.26719	0	28	5.65	69.9696	Main stem
18/01/2016 06:47	111.835	2.27806	0	28	5.63	69.7318	Main stem
18/01/2016 06:52	111.832	2.28162	0	28.1	5.62	69.7258	Main stem
18/01/2016 06:57	111.822	2.28637	0	28.2	5.68	70.5888	Main stem
18/01/2016 07:02	111.813	2.28584	0	28	5.52	68.3893	Main stem
18/01/2016 07:07	111.813	2.28612	0	28	5.5	68.1416	Main stem
18/01/2016 07:12	111.813	2.28613	0	28	5.52	68.3893	Main stem
18/01/2016 07:17	111.813	2.28609	0	28	5.51	68.2655	Main stem
18/01/2016 07:22	111.819	2.28659	0	28	5.65	70	Main stem
18/01/2016 23:53	111.811	2.25649	0	27.5	5.7	69.8548	Main stem
18/01/2016 23:58	111.816	2.24412	0	27.5	5.72	70.0999	Main stem
19/01/2016 00:03	111.811	2.23184	0	27.6	5.67	69.5857	Main stem
19/01/2016 00:10	111.793	2.23347	0	27.7	5.68	69.8067	Main stem
19/01/2016 00:15	111.789	2.24693	0	27.7	5.68	69.8067	Main stem
19/01/2016 00:20	111.783	2.25551	0	27.8	5.69	70.0195	Main stem
19/01/2016 00:25	111.773	2.24917	0	27.8	5.66	69.6488	Main stem
19/01/2016 00:30	111.76	2.24459	0	27.8	5.61	69.0335	Main stem
19/01/2016 00:35	111.753	2.25531	0	27.9	5.62	69.2539	Main stem
19/01/2016 00:40	111.747	2.26778	0	27.9	5.56	68.5146	Main stem
19/01/2016 00:45	111.737	2.27655	0	28	5.6	69.104	Main stem
19/01/2016 00:50	111.723	2.27713	0	28	5.53	68.2305	Main stem
19/01/2016 01:56	111.646	2.35651	0	28	5.25	64.7569	Belawai
19/01/2016 02:01	111.641	2.3589	0	28	5.23	64.5103	Belawai
19/01/2016 02:07	111.641	2.35905	0	28	5.21	64.2731	Belawai
19/01/2016 02:12	111.642	2.35898	0	28	5.22	64.3964	Belawai
19/01/2016 02:17	111.636	2.36023	0	28	5.22	64.3964	Belawai
19/01/2016 02:22	111.626	2.36234	0	28.1	5.21	64.3723	Belawai
19/01/2016 02:27	111.616	2.36078	0	28.1	5.21	64.3627	Belawai
19/01/2016 02:32	111.612	2.35781	0	28.1	5.14	63.5025	Belawai
19/01/2016 02:37	111.606	2.34903	0	28.2	5.22	64.5902	Belawai
19/01/2016 02:42	111.601	2.34121	0	28.2	5.17	63.9715	Belawai
19/01/2016 02:47	111.602	2.33227	0	28.2	5.18	64.1047	Belawai
19/01/2016 02:54	111.595	2.32547	0	28.3	5.23	64.8229	Belawai
19/01/2016 02:59	111.587	2.32721	0	28.3	5.25	65.0708	Belawai
19/01/2016 03:04	111.578	2.3284	0	28.3	5.26	65.1947	Belawai
19/01/2016 03:09	111.57	2.32843	0	28.3	5.2	64.4404	Belawai
19/01/2016 03:14	111.562	2.32596	0	28.3	5.2	64.4602	Belawai
19/01/2016 03:19	111.555	2.32867	0	28.4	5.21	64.6832	Belawai
19/01/2016 03:24	111.553	2.33637	0	28.5	5.25	65.2891	Belawai
19/01/2016 03:29	111.553	2.34424	0	28.5	5.17	64.2942	Belawai
19/01/2016 03:34	111.553	2.35221	0	28.4	5.16	64.0705	Belawai
19/01/2016 03:39	111.551	2.36038	0	28.5	5.18	64.4232	Belawai
19/01/2016 03:44	111.543	2.36139	0.226907	28.5	5.21	64.7963	Belawai
19/01/2016 03:49	111.537	2.35638	0.0899763	28.4	5.17	64.2098	Belawai
19/01/2016 03:54	111.531	2.35126	0	28.4	5.11	63.474	Belawai
19/01/2016 03:59	111.523	2.34905	0	28.4	5.08	63.1014	Belawai
19/01/2016 04:04	111.515	2.35092	0	28.4	5.13	63.7238	Belawai
19/01/2016 04:09	111.51	2.35106	0.00496585	28.5	5.1	63.4571	Belawai
19/01/2016 04:16	111.51	2.35111	0.0182001	28.5	5.1	63.4651	Belawai
19/01/2016 04:46	111.47	2.36216	4.9129	28.7	4.87	60.8097	Belawai
19/01/2016 04:51	111.461	2.36654	6.10953	28.7	4.86	60.6935	Belawai
19/01/2016 04:56	111.452	2.37132	7.33849	28.7	4.89	61.0771	Belawai
19/01/2016 05:01	111.442	2.37663	8.67058	28.8	4.84	60.5445	Belawai
19/01/2016 05:07	111.431	2.3768	9.88011	29.3	5.03	63.4058	Belawai
19/01/2016 05:12	111.422	2.37331	10.6061	29	4.82	60.4926	Belawai
19/01/2016 05:17	111.412	2.36801	11.4199	29.3	4.88	61.5237	Belawai
19/01/2016 05:22	111.403	2.36622	12.2781	29.6	5.16	65.3552	Belawai
19/01/2016 05:27	111.393	2.36605	13.4004	29.3	4.9	61.7938	Belawai
19/01/2016 05:32	111.383	2.36193	14.2156	29.5	5.14	65.0144	Belawai
19/01/2016 05:37	111.376	2.35549	14.5782	29.5	5.23	66.1609	Belawai
19/01/2016 05:43	111.366	2.34792	14.8956	29.5	5.15	65.1598	Belawai
19/01/2016 05:48	111.356	2.35103	16.2919	30	5.72	72.9095	Belawai
19/01/2016 05:53	111.347	2.35574	17.6761	29.7	5.55	70.4402	Belawai
19/01/2016 05:58	111.341	2.35849	18.5589	30	5.64	71.9107	Belawai
19/01/2016 06:08	111.34	2.35849	18.5588	29.5	5.58	70.6302	Belawai
19/01/2016 06:13	111.335	2.3673	18.97	30.1	5.76	73.5649	Belawai
19/01/2016 06:18	111.328	2.37147	19.3065	29.3	4.87	61.4648	Belawai
19/01/2016 06:23	111.321	2.36841	19.448	29.4	4.95	62.568	Belawai
19/01/2016 06:28	111.314	2.36461	19.5236	29.1	4.77	60.0309	Belawai
19/01/2016 06:33	111.308	2.35918	19.4986	29.1	4.84	60.9119	Belawai
19/01/2016 06:38	111.308	2.35425	19.3324	30	5.28	67.3551	Belawai
19/01/2016 06:43	111.313	2.3489	19.0159	29.5	5.04	63.8193	Belawai
19/01/2016 06:48	111.319	2.34263	18.645	29.4	4.87	61.5747	Belawai
19/01/2016 06:55	111.318	2.33234	18.3132	29.8	5.25	66.7751	Belawai
19/01/2016 07:00	111.312	2.32732	18.338	29.4	4.88	61.7041	Belawai
19/01/2016 07:05	111.307	2.32024	18.2406	29.6	5.11	64.8112	Belawai
19/01/2016 07:10	111.304	2.30988	17.9722	29.7	5.16	65.5426	Belawai
19/01/2016 07:15	111.295	2.3047	18.0603	29.8	5.14	65.3997	Belawai
19/01/2016 07:20	111.298	2.29559	17.5703	30.3	5.22	66.9075	Belawai
19/01/2016 07:25	111.295	2.29614	17.753	30.3	5.19	66.5325	Belawai
19/01/2016 07:33	111.291	2.29175	17.9601	29.9	5.04	64.2313	Belawai
19/01/2016 07:38	111.282	2.2843	18.4161	30.5	5.35	68.7838	Belawai
19/01/2016 07:43	111.28	2.27231	18.4332	30.1	5.21	66.5936	Belawai
19/01/2016 07:48	111.281	2.25894	18.192	30.2	5.36	68.6114	Belawai
19/01/2016 07:53	111.283	2.24661	17.915	30.8	6.47	83.5457	Belawai
19/01/2016 07:58	111.283	2.23375	17.7333	30.6	6.35	81.7593	Belawai
19/01/2016 08:03	111.283	2.22079	17.5817	30.7	6.55	84.4566	Belawai
19/01/2016 08:08	111.283	2.20738	17.4096	30.6	6.36	81.888	Belawai
19/01/2016 08:13	111.275	2.19786	17.8298	30.3	5.97	76.5256	Belawai
19/01/2016 08:18	111.262	2.19353	18.6023	30.3	6.16	78.973	Belawai
19/01/2016 08:23	111.25	2.19627	19.4354	29.9	6.07	77.3635	Belawai
19/01/2016 08:28	111.243	2.20555	19.9918	30	6.18	78.8841	Belawai
19/01/2016 08:31	111.239	2.21234	20.3485	30	6.17	78.7657	Belawai
19/01/2016 08:36	111.232	2.22306	20.9158	30.5	6.61	85.0021	Belawai
19/01/2016 08:41	111.227	2.23151	21.2995	30.4	6.66	85.5205	Belawai

## Sheet: Jan2016_Ancillary
Station	Date Time LT	Date Time GMT	Latitude	Longitude	T (deg C)	Salinity	pH WTW	DO WTW (mg/L)	SPM (mg/L)	+/- SPM (mg/L)	pCO2	FTIR/Li-time	DIC (calc.) (umol/L)	POC (mg/L)	+/- POC (mg/L)	Corg (%)
RAJ01	2016-01-16 06:45:00	2016-01-15 22:45:00	2.1864	111.551	27.7	0	6.809	4.13	327.204	13.2882	nan			9.08646	0.369012	2.777
RAJ02	2016-01-16 10:30:00	2016-01-16 02:30:00	2.2403	111.816	27.2	0	6.408	5.53	188.232	7.72928	nan			2.80277	0.115089	1.489
RAJ03	2016-01-16 11:55:00	2016-01-16 03:55:00	2.2343	111.849	27.4	0	6.55	5.94	116.296	4.85184	2915.05	2016-01-16 03:51:00	243.553	1.74793	0.0729232	1.503
RAJ04	2016-01-16 14:30:00	2016-01-16 06:30:00	2.1467	111.985	28.2	0	6.673	6.26	92.7	3.908	nan			1.76686	0.0744865	1.906
RAJ05	2016-01-16 16:13:00	2016-01-16 08:13:00	2.1265	112.12	28.7	0	6.673	7.27	125.456	5.21824	nan			2.5593	0.106452	2.04
RAJ06	2016-01-17 07:15:00	2016-01-16 23:15:00	2.0807	112.189	27	0	6.791	7.29	109.736	4.58944	2769.28	2016-01-17 00:31:00	338.697	1.88965	0.0790302	1.722
RAJ07	2016-01-17 09:49:00	2016-01-17 01:49:00	2.0528	112.342	27.5	0	6.793	6.29	137.952	5.71808	2433.56	2016-01-17 01:49:00	297.442	1.87339	0.0776515	1.358
RAJ08	2016-01-17 00:47:00	2016-01-17 02:47:00	2.0246	112.495	27.7	0	6.742	7.24229	236.14	9.6456	2457.17	2016-01-17 03:05:00	274.393	3.1383	0.12819	1.329
RAJ09	2017-01-17 14:00:00	2016-01-17 06:00:00	2.0096	112.647	28.5	0	6.703	6.45	218.74	8.9496	2405.06	2016-01-17 06:00:00	249.778	2.82393	0.115539	1.291
RAJ10	2016-01-17 16:45:00	2016-01-17 08:45:00	2.0148	112.833	27.3	0	6.783	6.59	305.432	12.4173	2432.73	2016-01-17 08:45:00	293.521	3.04516	0.1238	0.997
RAJ11	2016-01-19 08:55:00	2016-01-19 00:55:00	2.2838	111.709	28	0	6.712	5.44	178.58	7.3432	3311.96	2016-01-19 00:55:00	350.876	2.29297	0.0942867	1.284
RAJ12	2016-01-19 10:00:00	2016-01-19 02:00:00	2.359	111.641	27.9	0	6.51	5.22	171.424	7.05696	3723.46	2016-01-19 02:00:00	291.363	2.04852	0.0843307	1.195
RAJ13	2016-01-19 12:10:00	2016-01-19 04:10:00	2.3518	111.51	28.3	0	6.626	5.08	122.124	5.08496	4050.83	2016-01-19 04:10:00	372.148	2.23609	0.0931056	1.831
RAJ14	2016-01-19 13:55:00	2016-01-19 05:55:00	2.3586	111.341	30.1	19.2	7.761	5.55	101.972	4.27888	1306.16	2016-01-19 05:55:00		1.2206	0.0512182	1.197
RAJ15	2016-01-19 15:22:00	2016-01-19 07:22:00	2.296	111.295	30.1	18.4	7.487	5.11	47.078	1.04156	2139.88	2016-01-19 07:22:00		0.711819	0.0157484	1.512

## Sheet: Aug2016_CO2 and CO2 flux
Time	Longitude (interp)	Latitude (interp)	Salinity (interp)	CO2 (ppm)	Instrument	T in equil.water (C)	T in water (WTW interp./C)	ambient pressure (atm)	pCO2 (corr./ uatm)	K_CO2 (mol L-1 atm-1)	Schmidt number for freshwater	Schmidt number for saltwater	Schmidt number	k_T	Flux (gC/m2d)	Location
20/08/2016 11:45	111.466	2.16251	28.8	1552.35	LI820	30.63	30.7	0.993	1476.98	0.02579	355.011	394.543	389.461	11.878	0.956129	Rajang
20/08/2016 11:46	111.468	2.16322	28.8	1579.55	LI820	30.51	30.7	0.993	1510.38	0.02579	355.011	394.543	389.461	11.878	0.985596	Rajang
20/08/2016 11:47	111.47	2.16339	28.8	1567.44	LI820	30.39	30.7	0.993	1506.56	0.02579	355.011	394.543	389.461	11.878	0.982226	Rajang
20/08/2016 11:48	111.473	2.16339	28.7	1585.49	LI820	30.31	30.7	0.993	1529.18	0.02579	355.011	394.543	389.461	11.878	1.00218	Rajang
20/08/2016 11:49	111.475	2.16323	28.7	1594.64	LI820	30.23	30.7	0.993	1542.96	0.02579	355.011	394.543	389.461	11.878	1.01434	Rajang
20/08/2016 11:50	111.477	2.1627	28.7	1594.64	LI820	30.18	30.7	0.993	1546.01	0.02579	355.011	394.543	389.461	11.878	1.01703	Rajang
20/08/2016 11:51	111.479	2.16176	28.7	1588.46	LI820	30.13	30.7	0.993	1543.05	0.02579	355.011	394.543	389.461	11.878	1.01442	Rajang
20/08/2016 11:52	111.481	2.16051	28.7	1600.58	LI820	30.02	30.7	0.993	1562.61	0.02579	355.011	394.543	389.461	11.878	1.03168	Rajang
20/08/2016 11:53	111.482	2.15842	28.7	1600.59	LI820	29.93	30.7	0.993	1568.04	0.02579	355.011	394.543	389.461	11.878	1.03647	Rajang
20/08/2016 11:54	111.482	2.15609	28.7	0.956129	LI820	29.87	30.7	0.993	1572.27	0.02579	355.011	394.543	389.461	11.878	1.0402	Rajang
20/08/2016 11:55	111.482	2.15382	28.7	1612.71	LI820	29.77	30.7	0.993	1591.08	0.02579	355.011	394.543	389.461	11.878	1.05679	Rajang
20/08/2016 11:56	111.481	2.15152	28.7	1636.95	LI820	29.71	30.7	0.993	1619.08	0.02579	355.011	394.543	389.461	11.878	1.0815	Rajang
20/08/2016 11:57	111.48	2.14927	28.6	1624.83	LI820	29.71	30.7	0.993	1607.22	0.02579	355.011	394.543	389.461	11.878	1.07103	Rajang
20/08/2016 11:58	111.48	2.14702	28.4	1633.98	LI820	29.78	30.7	0.993	1611.52	0.02579	355.011	394.543	389.461	11.878	1.07483	Rajang
20/08/2016 11:59	111.48	2.14471	28.2	1661.19	LI820	29.84	30.7	0.993	1633.99	0.02579	355.011	394.543	389.461	11.878	1.09465	Rajang
20/08/2016 12:00	111.48	2.14253	28.1	1673.31	LI820	29.9	30.7	0.993	1641.51	0.02579	355.011	394.543	389.461	11.878	1.10128	Rajang
20/08/2016 12:01	111.482	2.14101	27.9	1667.13	LI820	29.91	30.7	0.993	1635.06	0.02579	355.011	394.543	389.461	11.878	1.09559	Rajang
20/08/2016 12:02	111.484	2.13996	27.8	1676.28	LI820	29.91	30.7	0.993	1643.87	0.02579	355.011	394.543	389.461	11.878	1.10337	Rajang
20/08/2016 12:03	111.486	2.13952	27.7	1682.47	LI820	29.85	30.7	0.993	1654.03	0.02579	355.011	394.543	389.461	11.878	1.11233	Rajang
20/08/2016 12:04	111.488	2.13931	27.6	1661.2	LI820	29.78	30.7	0.993	1638.18	0.02579	355.011	394.543	389.461	11.878	1.09835	Rajang
20/08/2016 12:05	111.49	2.13925	27.5	1682.47	LI820	29.72	30.7	0.993	1662.93	0.0258	355.011	394.543	389.461	11.878	1.12062	Rajang
20/08/2016 12:06	111.492	2.1392	27.4	1697.56	LI820	29.65	30.7	0.993	1682.89	0.0258	355.011	394.543	389.461	11.878	1.13823	Rajang
20/08/2016 12:07	111.494	2.13925	27.4	1697.56	LI820	29.55	30.7	0.993	1690.04	0.0258	355.011	394.543	389.461	11.878	1.14454	Rajang
20/08/2016 12:08	111.497	2.13939	27.3	1706.71	LI820	29.44	30.7	0.993	1707.23	0.0258	355.011	394.543	389.461	11.878	1.15971	Rajang
20/08/2016 12:09	111.499	2.13953	27.3	1712.65	LI820	29.34	30.7	0.993	1720.86	0.0258	355.011	394.543	389.461	11.878	1.17174	Rajang
20/08/2016 12:10	111.501	2.13983	27.2	1712.65	LI820	29.27	30.7	0.993	1725.72	0.0258	355.011	394.543	389.348	11.8797	1.1762	Rajang
20/08/2016 12:11	111.503	2.13998	27.2	1733.92	LI820	29.19	30.7	0.993	1753.4	0.0258	355.011	394.543	389.348	11.8797	1.20064	Rajang
20/08/2016 12:12	111.505	2.14015	27.1	1721.81	LI820	29.15	30.7	0.993	1743.53	0.0258	355.011	394.543	389.348	11.8797	1.19192	Rajang
20/08/2016 12:13	111.507	2.14009	27	1727.74	LI820	29.07	30.7	0.993	1755.94	0.0258	355.011	394.543	389.348	11.8797	1.20288	Rajang
20/08/2016 12:14	111.509	2.13954	26.9	1764.1	LI820	29.01	30.7	0.993	1797.29	0.0258	355.011	394.543	389.348	11.8797	1.23938	Rajang
20/08/2016 12:15	111.512	2.13854	26.8	1773.25	LI820	29	30.7	0.993	1807.07	0.0258	355.011	394.543	389.348	11.8797	1.24801	Rajang
20/08/2016 12:16	111.513	2.13715	26.6	1764.11	LI820	29.12	30.7	0.993	1788.57	0.0258	355.011	394.543	389.348	11.8797	1.23168	Rajang
20/08/2016 12:17	111.515	2.13573	26.5	1794.28	LI820	29.15	30.7	0.993	1816.92	0.0258	355.011	394.543	389.348	11.8797	1.25671	Rajang
20/08/2016 12:18	111.517	2.13448	26.3	1779.2	LI820	29.21	30.7	0.993	1797.73	0.0258	355.011	394.543	389.348	11.8797	1.23977	Rajang
20/08/2016 12:19	111.518	2.13377	26.2	1797.5	LI820	29.36	30.7	0.993	1804.67	0.0258	355.011	394.543	389.348	11.8797	1.24589	Rajang
20/08/2016 12:20	111.519	2.13331	26.2	1791.32	LI820	29.49	30.7	0.993	1788.6	0.0258	355.011	394.543	389.348	11.8797	1.23171	Rajang
20/08/2016 12:21	111.52	2.1331	26.1	1809.62	LI820	29.61	30.7	0.993	1797.81	0.0258	355.011	394.543	389.348	11.8797	1.23984	Rajang
20/08/2016 12:22	111.52	2.13313	26.1	1833.61	LI820	29.79	30.7	0.993	1807.32	0.0258	355.011	394.543	389.348	11.8797	1.24823	Rajang
20/08/2016 12:23	111.52	2.13306	26.1	1821.5	LI820	29.82	30.7	0.993	1793.38	0.0258	355.011	394.543	389.348	11.8797	1.23593	Rajang
20/08/2016 12:24	111.52	2.13305	26.1	1809.63	LI820	29.91	30.7	0.9931	1774.72	0.0258	355.011	394.543	389.348	11.8797	1.21942	Rajang
20/08/2016 12:25	111.52	2.13306	26.1	1845.74	LI820	29.86	30.7	0.9931	1814.56	0.0258	355.011	394.543	389.348	11.8797	1.25459	Rajang
20/08/2016 12:26	111.52	2.13307	26.1	1857.86	LI820	29.68	30.7	0.9931	1840.03	0.0258	355.011	394.543	389.348	11.8797	1.27707	Rajang
20/08/2016 12:27	111.52	2.13304	26.1	1839.81	LI820	29.86	30.7	0.9931	1808.37	0.0258	355.011	394.543	389.348	11.8797	1.24912	Rajang
20/08/2016 12:28	111.52	2.1331	26.1	1839.81	LI820	29.98	30.7	0.9931	1799.58	0.02581	355.011	394.543	389.348	11.8797	1.24185	Rajang
20/08/2016 12:29	111.52	2.13314	26.1	1830.66	LI820	29.95	30.7	0.9931	1793.71	0.02581	355.011	394.543	389.348	11.8797	1.23666	Rajang
20/08/2016 12:30	111.52	2.13306	26.1	1830.66	LI820	29.98	30.7	0.9931	1791.77	0.02581	355.011	394.543	389.348	11.8797	1.23495	Rajang
20/08/2016 12:31	111.52	2.13306	26.1	1821.51	LI820	30.05	30.7	0.9931	1777.78	0.02581	355.011	394.543	389.348	11.8797	1.2226	Rajang
20/08/2016 12:32	111.52	2.1331	26.1	1815.58	LI820	30.05	30.7	0.9931	1771.69	0.02581	355.011	394.543	389.348	11.8797	1.21722	Rajang
20/08/2016 12:33	111.52	2.13305	26.1	1809.65	LI820	30.01	30.7	0.9931	1769.09	0.02581	355.011	394.543	389.348	11.8797	1.21492	Rajang
20/08/2016 12:34	111.52	2.13306	26.1	1803.47	LI820	29.93	30.7	0.9931	1768.32	0.02581	355.011	394.543	389.348	11.8797	1.21424	Rajang
20/08/2016 12:35	111.52	2.13305	26.1	2094.07	LI820	29.95	30.7	0.9931	2051.66	0.02581	355.011	394.543	389.235	11.8814	1.46466	Rajang
20/08/2016 12:36	111.52	2.13305	26.1	1848.98	LI820	29.91	30.7	0.9931	1813.96	0.02581	355.011	394.543	389.235	11.8814	1.25473	Rajang
20/08/2016 12:37	111.52	2.13305	26.1	1870	LI820	29.98	30.7	0.9931	1828.38	0.02581	355.011	394.543	389.235	11.8814	1.26746	Rajang
20/08/2016 12:38	111.52	2.13306	26.1	1915.51	LI820	30.05	30.7	0.9931	1866.95	0.02581	355.011	394.543	389.235	11.8814	1.30153	Rajang
20/08/2016 12:39	111.52	2.13304	26.1	1924.42	LI820	30.19	30.7	0.9931	1865.06	0.02581	355.011	394.543	389.235	11.8814	1.29986	Rajang
20/08/2016 12:40	111.52	2.13304	26.1	1912.55	LI820	30.26	30.7	0.9931	1847.35	0.02581	355.011	394.543	389.235	11.8814	1.28422	Rajang
20/08/2016 12:41	111.52	2.13306	26.1	1945.69	LI820	30.35	30.7	0.9931	1872.23	0.02581	355.011	394.543	389.235	11.8814	1.30619	Rajang
20/08/2016 12:42	111.52	2.13306	26.1	1933.58	LI820	30.37	30.7	0.9931	1859.56	0.02581	355.011	394.543	389.235	11.8814	1.295	Rajang
20/08/2016 12:43	111.52	2.13306	26.1	1960.78	LI820	30.47	30.7	0.9931	1877.77	0.02581	355.011	394.543	389.235	11.8814	1.31108	Rajang
20/08/2016 12:44	111.52	2.13306	26.1	1966.97	LI820	30.49	30.7	0.9931	1882.06	0.02581	355.011	394.543	389.235	11.8814	1.31487	Rajang
20/08/2016 12:45	111.52	2.13305	26.1	1966.97	LI820	30.47	30.7	0.9931	1883.03	0.02581	355.011	394.543	389.235	11.8814	1.31573	Rajang
20/08/2016 12:46	111.52	2.13306	26.1	1979.09	LI820	30.5	30.7	0.9931	1892.44	0.02581	355.011	394.543	389.235	11.8814	1.32404	Rajang
20/08/2016 12:47	111.52	2.13306	26.1	2009.27	LI820	30.56	30.7	0.9931	1916.21	0.02581	355.011	394.543	389.235	11.8814	1.34503	Rajang
20/08/2016 12:48	111.52	2.13305	26.1	2009.27	LI820	30.64	30.7	0.9931	1910.02	0.02581	355.011	394.543	389.235	11.8814	1.33957	Rajang
20/08/2016 12:49	111.52	2.13306	26.1	1988	LI820	30.62	30.7	0.9931	1891.26	0.02581	355.011	394.543	389.235	11.8814	1.323	Rajang
20/08/2016 12:50	111.52	2.13306	26.1	2003.34	LI820	30.63	30.7	0.9931	1904.77	0.02581	355.011	394.543	389.235	11.8814	1.33493	Rajang
20/08/2016 12:51	111.52	2.13306	26.1	2009.28	LI820	30.66	30.7	0.9931	1908.04	0.02582	355.011	394.543	389.235	11.8814	1.33834	Rajang
20/08/2016 12:52	111.52	2.13306	26.1	2009.28	LI820	30.73	30.7	0.9931	1903.09	0.02582	355.011	394.543	389.235	11.8814	1.33396	Rajang
20/08/2016 12:53	111.52	2.13305	26.1	2033.52	LI820	30.73	30.7	0.9931	1925.55	0.02582	355.011	394.543	389.235	11.8814	1.35381	Rajang
20/08/2016 12:54	111.52	2.13306	26.1	2027.34	LI820	30.71	30.7	0.9931	1921.77	0.02582	355.011	394.543	389.235	11.8814	1.35047	Rajang
20/08/2016 12:55	111.52	2.13306	26.1	2054.8	LI820	30.72	30.7	0.9931	1946.54	0.02582	355.011	394.543	389.235	11.8814	1.37235	Rajang
20/08/2016 12:56	111.52	2.13306	26.1	2048.62	LI820	30.64	30.7	0.9931	1947.45	0.02582	355.011	394.543	389.235	11.8814	1.37315	Rajang
20/08/2016 12:57	111.52	2.13305	26.1	2036.5	LI820	30.5	30.7	0.9931	1947.44	0.02582	355.011	394.543	389.235	11.8814	1.37315	Rajang
20/08/2016 12:58	111.52	2.13306	26.1	2066.68	LI820	30.37	30.7	0.9931	1987.36	0.02582	355.011	394.543	389.235	11.8814	1.40842	Rajang
20/08/2016 12:59	111.52	2.13305	26.1	2060.74	LI820	30.28	30.7	0.9931	1989.19	0.02582	355.011	394.543	389.235	11.8814	1.41003	Rajang
20/08/2016 13:00	111.52	2.13306	26.1	2066.68	LI820	30.2	30.7	0.9931	2001.12	0.02582	355.011	394.543	389.122	11.8832	1.42078	Rajang
20/08/2016 13:01	111.52	2.13304	26.1	2066.68	LI820	30.11	30.7	0.9931	2009.03	0.02582	355.011	394.543	389.122	11.8832	1.42777	Rajang
20/08/2016 13:02	111.52	2.13306	26.1	2106.26	LI820	30	30.7	0.9931	2057.57	0.02582	355.011	394.543	389.122	11.8832	1.47066	Rajang
20/08/2016 13:03	111.52	2.13303	26.1	2118.13	LI820	29.98	30.7	0.9931	2070.47	0.02582	355.011	394.543	389.122	11.8832	1.48206	Rajang
20/08/2016 13:04	111.52	2.13302	26.1	2130.25	LI820	29.93	30.7	0.9931	2087.01	0.02582	355.011	394.543	389.122	11.8832	1.49668	Rajang
20/08/2016 13:05	111.52	2.13305	26.1	2154.49	LI820	29.94	30.7	0.9932	2109.64	0.02582	355.011	394.543	389.122	11.8832	1.51664	Rajang
20/08/2016 13:06	111.52	2.13303	26.1	2166.62	LI820	30	30.7	0.9932	2115.97	0.02582	355.011	394.543	389.122	11.8832	1.52223	Rajang
20/08/2016 13:07	111.52	2.13301	26.1	2190.86	LI820	30.08	30.7	0.9932	2132.41	0.02582	355.011	394.543	389.122	11.8832	1.53676	Rajang
20/08/2016 13:08	111.52	2.13302	26.1	2209.16	LI820	29.96	30.7	0.9932	2162.07	0.02582	355.011	394.543	389.122	11.8832	1.56297	Rajang
20/08/2016 13:09	111.52	2.13303	26.1	2215.1	LI820	29.95	30.7	0.9932	2168.78	0.02582	355.011	394.543	389.122	11.8832	1.5689	Rajang
20/08/2016 13:10	111.52	2.13301	26.1	2236.37	LI820	29.83	30.7	0.9932	2200.62	0.02582	355.011	394.543	389.122	11.8832	1.59703	Rajang
20/08/2016 13:11	111.52	2.13304	26.1	2263.58	LI820	29.84	30.7	0.9932	2226.47	0.02582	355.011	394.543	389.122	11.8832	1.61988	Rajang
20/08/2016 13:12	111.52	2.13303	26.1	2254.43	LI820	29.86	30.7	0.9932	2214.94	0.02582	355.011	394.543	389.122	11.8832	1.60969	Rajang
20/08/2016 13:13	111.52	2.13304	26.1	2254.44	LI820	29.78	30.7	0.9932	2222.72	0.02582	355.011	394.543	389.122	11.8832	1.61656	Rajang
20/08/2016 13:14	111.52	2.13303	26.1	2254.44	LI820	29.76	30.7	0.9932	2224.51	0.02583	355.011	394.543	389.122	11.8832	1.61877	Rajang
20/08/2016 13:15	111.52	2.13303	26.1	2269.53	LI820	29.68	30.7	0.9932	2246.71	0.02583	355.011	394.543	389.122	11.8832	1.63839	Rajang
20/08/2016 13:16	111.52	2.13302	26.1	2260.63	LI820	29.77	30.7	0.9932	2229.41	0.02583	355.011	394.543	389.122	11.8832	1.6231	Rajang
20/08/2016 13:17	111.52	2.13302	26.1	2260.63	LI820	29.81	30.7	0.9932	2226.04	0.02583	355.011	394.543	389.122	11.8832	1.62012	Rajang
20/08/2016 13:18	111.52	2.13305	26.1	2308.86	LI820	29.8	30.7	0.9932	2274.37	0.02583	355.011	394.543	389.122	11.8832	1.66285	Rajang
20/08/2016 13:19	111.52	2.13302	26.1	2320.99	LI820	29.68	30.7	0.9932	2298.35	0.02583	355.011	394.543	389.122	11.8832	1.68404	Rajang
20/08/2016 13:20	111.52	2.13307	26.1	2333.11	LI820	29.61	30.7	0.9932	2317.4	0.02583	355.011	394.543	389.122	11.8832	1.70088	Rajang
20/08/2016 13:21	111.52	2.13307	26.1	2366.5	LI820	29.5	30.7	0.9932	2360.79	0.02583	355.011	394.543	389.122	11.8832	1.73924	Rajang
20/08/2016 13:22	111.52	2.1331	26.1	2357.35	LI820	29.48	30.7	0.9932	2354.48	0.02583	355.011	394.543	389.122	11.8832	1.73366	Rajang
20/08/2016 13:23	111.52	2.13305	26.1	2363.54	LI820	29.41	30.7	0.9932	2367.41	0.02583	355.011	394.543	389.122	11.8832	1.74509	Rajang
20/08/2016 13:24	111.52	2.13306	26.1	2363.54	LI820	29.46	30.7	0.9932	2362.46	0.02583	355.011	394.543	389.009	11.8849	1.74097	Rajang
20/08/2016 13:25	111.52	2.13296	26.1	2384.57	LI820	29.52	30.7	0.9932	2377.84	0.02583	355.011	394.543	389.009	11.8849	1.75457	Rajang
20/08/2016 13:26	111.52	2.13293	26.1	2393.72	LI820	29.39	30.7	0.9932	2399.75	0.02583	355.011	394.543	389.009	11.8849	1.77394	Rajang
20/08/2016 13:27	111.52	2.13301	26.1	2378.64	LI820	29.3	30.7	0.9932	2393.97	0.02583	355.011	394.543	389.009	11.8849	1.76883	Rajang
20/08/2016 13:28	111.52	2.13298	26.1	2396.7	LI820	29.38	30.7	0.9932	2403.89	0.02583	355.011	394.543	389.009	11.8849	1.7776	Rajang
20/08/2016 13:29	111.52	2.13301	26.1	2408.82	LI820	29.36	30.7	0.9932	2417.47	0.02583	355.011	394.543	389.009	11.8849	1.78961	Rajang
20/08/2016 13:30	111.52	2.13306	26.1	2402.88	LI820	29.38	30.7	0.9932	2410.16	0.02583	355.011	394.543	389.009	11.8849	1.78314	Rajang
20/08/2016 13:31	111.52	2.13303	26.1	2420.94	LI820	29.42	30.7	0.9932	2424.45	0.02583	355.011	394.543	389.009	11.8849	1.79578	Rajang
20/08/2016 13:32	111.52	2.13306	26.1	2408.83	LI820	29.42	30.7	0.9932	2411.74	0.02583	355.011	394.543	389.009	11.8849	1.78454	Rajang
20/08/2016 13:33	111.52	2.13301	26.1	2420.95	LI820	29.34	30.7	0.9932	2432.62	0.02583	355.011	394.543	389.009	11.8849	1.803	Rajang
20/08/2016 13:34	111.52	2.13306	26.1	2378.66	LI820	29.33	30.7	0.9932	2391.07	0.02583	355.011	394.543	389.009	11.8849	1.76626	Rajang
20/08/2016 13:35	111.52	2.13304	26.1	2402.9	LI820	29.34	30.7	0.9932	2413.6	0.02583	355.011	394.543	389.009	11.8849	1.78618	Rajang
20/08/2016 13:36	111.52	2.13304	26.1	2408.84	LI820	29.28	30.7	0.9932	2426.27	0.02583	355.011	394.543	389.009	11.8849	1.79739	Rajang
20/08/2016 13:37	111.52	2.13303	26.1	2442.23	LI820	29.33	30.7	0.9932	2454.41	0.02584	355.011	394.543	389.009	11.8849	1.82297	Rajang
20/08/2016 13:38	111.52	2.13302	26.1	2496.65	LI820	29.37	30.7	0.9932	2505.46	0.02584	355.011	394.543	389.009	11.8849	1.86812	Rajang
20/08/2016 13:39	111.52	2.13302	26.1	2457.33	LI820	29.32	30.7	0.9932	2470.44	0.02584	355.011	394.543	389.009	11.8849	1.83715	Rajang
20/08/2016 13:40	111.52	2.13304	26.1	2508.77	LI820	29.2	30.7	0.9932	2535.86	0.02584	355.011	394.543	389.009	11.8849	1.89501	Rajang
20/08/2016 13:41	111.52	2.13301	26.1	2484.54	LI820	29.24	30.7	0.9932	2506.49	0.02584	355.011	394.543	389.009	11.8849	1.86903	Rajang
20/08/2016 13:42	111.52	2.13303	26.1	2490.48	LI820	29.23	30.7	0.9932	2513.75	0.02584	355.011	394.543	389.009	11.8849	1.87545	Rajang
20/08/2016 13:43	111.52	2.13303	26.1	2523.87	LI820	29.19	30.7	0.9932	2551.5	0.02584	355.011	394.543	389.009	11.8849	1.90884	Rajang
20/08/2016 13:44	111.52	2.13299	26.1	2469.46	LI820	29.22	30.7	0.9932	2493.14	0.02584	355.011	394.543	389.009	11.8849	1.85723	Rajang
20/08/2016 13:45	111.52	2.13304	26.1	2520.91	LI820	29.26	30.7	0.9933	2541.26	0.02584	355.011	394.543	389.009	11.8849	1.89975	Rajang
20/08/2016 13:46	111.52	2.13304	26.1	2493.7	LI820	29.29	30.7	0.9933	2510.68	0.02584	355.011	394.543	389.009	11.8849	1.8727	Rajang
20/08/2016 13:47	111.52	2.13302	26.1	2551.09	LI820	29.29	30.7	0.9933	2568.27	0.02584	355.011	394.543	389.009	11.8849	1.92364	Rajang
20/08/2016 13:48	111.52	2.13302	26.1	2499.65	LI820	29.23	30.7	0.9933	2522.87	0.02584	355.011	394.543	389.009	11.8849	1.88349	Rajang
20/08/2016 13:49	111.52	2.13301	26.1	2523.89	LI820	29.18	30.7	0.9933	2552.57	0.02584	355.011	394.543	388.896	11.8866	1.91003	Rajang
20/08/2016 13:50	111.52	2.13302	26.1	2575.34	LI820	29.13	30.7	0.9933	2610.26	0.02584	355.011	394.543	388.896	11.8866	1.96106	Rajang
20/08/2016 13:51	111.52	2.13303	26.1	2502.62	LI820	29.19	30.7	0.9933	2530.09	0.02584	355.011	394.543	388.896	11.8866	1.89015	Rajang
20/08/2016 13:52	111.52	2.13303	26.1	2554.07	LI820	29.17	30.7	0.9933	2585.08	0.02584	355.011	394.543	388.896	11.8866	1.93879	Rajang
20/08/2016 14:17	111.521	2.13433	26.2	2644.93	LI820	29.58	30.7	0.9933	2631.54	0.02585	355.011	394.543	388.783	11.8883	1.98094	Rajang
20/08/2016 14:18	111.521	2.13441	26.2	2602.63	LI820	29.61	30.7	0.9933	2585.44	0.02585	355.011	394.543	388.783	11.8883	1.94014	Rajang
20/08/2016 14:19	111.521	2.13449	26.2	2639	LI820	29.64	30.7	0.9933	2618.2	0.02585	355.011	394.543	388.783	11.8883	1.96913	Rajang
20/08/2016 14:20	111.521	2.13457	26.2	2623.91	LI820	29.78	30.7	0.9933	2588.81	0.02585	355.011	394.543	388.783	11.8883	1.94312	Rajang
20/08/2016 14:21	111.521	2.13465	26.2	2657.06	LI820	29.81	30.7	0.9933	2617.81	0.02585	355.011	394.543	388.783	11.8883	1.96879	Rajang
20/08/2016 14:22	111.521	2.13473	26.2	2620.7	LI820	29.72	30.7	0.9933	2591.57	0.02586	355.011	394.543	388.783	11.8883	1.94632	Rajang
20/08/2016 14:23	111.521	2.13481	26.2	2648.16	LI820	29.67	30.7	0.9933	2625.24	0.02586	355.011	394.543	388.783	11.8883	1.97613	Rajang
20/08/2016 14:24	111.521	2.1349	26.2	2626.89	LI820	29.62	30.7	0.9933	2609.38	0.02586	355.011	394.543	388.783	11.8883	1.96209	Rajang
20/08/2016 14:25	111.521	2.13498	26.2	2666.22	LI820	29.53	30.7	0.9933	2658.66	0.02586	355.011	394.543	388.783	11.8883	2.00572	Rajang
20/08/2016 14:26	111.521	2.13506	26.2	2681.32	LI820	29.41	30.7	0.9934	2687.27	0.02586	355.011	394.543	388.783	11.8883	2.03102	Rajang
20/08/2016 14:27	111.521	2.13514	26.2	2714.71	LI820	29.33	30.7	0.9934	2729.66	0.02586	355.011	394.543	388.783	11.8883	2.06855	Rajang
20/08/2016 14:28	111.521	2.13522	26.2	2681.32	LI820	29.3	30.7	0.9934	2699.25	0.02586	355.011	394.543	388.783	11.8883	2.04162	Rajang
20/08/2016 14:29	111.521	2.1353	26.2	2741.93	LI820	29.28	30.7	0.9934	2762.84	0.02586	355.011	394.543	388.783	11.8883	2.09793	Rajang
20/08/2016 14:30	111.521	2.13538	26.2	2657.09	LI820	29.23	30.7	0.9934	2682.91	0.02586	355.011	394.543	388.783	11.8883	2.02716	Rajang
20/08/2016 14:31	111.522	2.13546	26.2	2699.64	LI820	29.2	30.7	0.9934	2729.16	0.02586	355.011	394.543	388.783	11.8883	2.06811	Rajang
20/08/2016 14:32	111.522	2.13554	26.3	2669.22	LI820	29.23	30.7	0.9934	2695.13	0.02586	355.011	394.543	388.783	11.8883	2.03798	Rajang
20/08/2016 14:33	111.522	2.13562	26.3	2708.55	LI820	29.21	30.7	0.9934	2736.91	0.02586	355.011	394.543	388.783	11.8883	2.07497	Rajang
20/08/2016 14:34	111.522	2.1357	26.3	2760	LI820	29.16	30.7	0.9934	2795.66	0.02586	355.011	394.543	388.783	11.8883	2.12699	Rajang
20/08/2016 14:35	111.522	2.13578	26.3	2693.47	LI820	29.11	30.7	0.9934	2733.29	0.02586	355.011	394.543	388.783	11.8883	2.07176	Rajang
20/08/2016 14:36	111.522	2.13586	26.3	2741.95	LI820	29.1	30.7	0.9934	2784.13	0.02586	355.011	394.543	388.783	11.8883	2.11678	Rajang
20/08/2016 14:37	111.522	2.13594	26.3	2751.11	LI820	29.09	30.7	0.9934	2794.84	0.02586	355.011	394.543	388.783	11.8883	2.12626	Rajang
20/08/2016 14:38	111.522	2.13602	26.3	2732.81	LI820	29.09	30.7	0.9934	2775.93	0.02586	355.011	394.543	388.783	11.8883	2.10952	Rajang
20/08/2016 14:39	111.522	2.13611	26.3	2754.08	LI820	29.07	30.7	0.9934	2799.8	0.02586	355.011	394.543	388.67	11.8901	2.13096	Rajang
20/08/2016 14:40	111.522	2.13619	26.3	2802.57	LI820	29.07	30.7	0.9934	2849.9	0.02586	355.011	394.543	388.67	11.8901	2.17533	Rajang
20/08/2016 14:41	111.522	2.13627	26.3	2766.21	LI820	29.06	30.7	0.9934	2813.99	0.02586	355.011	394.543	388.67	11.8901	2.14353	Rajang
20/08/2016 14:42	111.522	2.13635	26.3	2811.48	LI820	29.06	30.7	0.9934	2860.16	0.02586	355.011	394.543	388.67	11.8901	2.18441	Rajang
20/08/2016 14:43	111.522	2.13643	26.3	2847.84	LI820	29.05	30.7	0.9934	2897.75	0.02586	355.011	394.543	388.67	11.8901	2.2177	Rajang
20/08/2016 14:44	111.522	2.13651	26.3	2751.13	LI820	29.04	30.7	0.9934	2800.37	0.02586	355.011	394.543	388.67	11.8901	2.13147	Rajang
20/08/2016 14:45	111.522	2.13659	26.3	2796.4	LI820	29.06	30.7	0.9934	2844.74	0.02587	355.011	394.543	388.67	11.8901	2.1716	Rajang
20/08/2016 14:46	111.522	2.13667	26.3	2763.26	LI820	29.03	30.7	0.9934	2814.11	0.02587	355.011	394.543	388.67	11.8901	2.14446	Rajang
20/08/2016 14:47	111.522	2.13675	26.3	2787.25	LI820	29.05	30.7	0.9934	2835.92	0.02587	355.011	394.543	388.67	11.8901	2.16378	Rajang
20/08/2016 14:48	111.523	2.13683	26.3	2835.74	LI820	29.05	30.7	0.9934	2885.93	0.02587	355.011	394.543	388.67	11.8901	2.20808	Rajang
20/08/2016 14:49	111.523	2.13691	26.3	2896.35	LI820	29.02	30.7	0.9934	2951.64	0.02587	355.011	394.543	388.67	11.8901	2.2663	Rajang
20/08/2016 14:50	111.523	2.13699	26.3	2947.8	LI820	28.99	30.7	0.9934	3007.7	0.02587	355.011	394.543	388.67	11.8901	2.31596	Rajang
20/08/2016 14:51	111.523	2.13707	26.3	2996.29	LI820	29.02	30.7	0.9934	3052.49	0.02587	355.011	394.543	388.67	11.8901	2.35564	Rajang
20/08/2016 14:52	111.523	2.13715	26.3	3038.59	LI820	29.09	30.7	0.9934	3087.39	0.02587	355.011	394.543	388.67	11.8901	2.38655	Rajang
20/08/2016 14:53	111.523	2.13723	26.3	3077.92	LI820	29.19	30.7	0.9934	3113.63	0.02587	355.011	394.543	388.67	11.8901	2.4098	Rajang
20/08/2016 14:54	111.523	2.13732	26.4	3117.26	LI820	29.22	30.7	0.9934	3150.03	0.02587	355.011	394.543	388.67	11.8901	2.44204	Rajang
20/08/2016 14:55	111.523	2.1374	26.4	3150.65	LI820	29.2	30.7	0.9934	3185.44	0.02587	355.011	394.543	388.67	11.8901	2.47341	Rajang
20/08/2016 14:56	111.523	2.13748	26.4	3177.87	LI820	29.27	30.7	0.9934	3203.41	0.02587	355.011	394.543	388.67	11.8901	2.48933	Rajang
20/08/2016 14:57	111.523	2.13756	26.4	3205.08	LI820	29.29	30.7	0.9934	3228.4	0.02587	355.011	394.543	388.67	11.8901	2.51147	Rajang
20/08/2016 14:58	111.523	2.13764	26.4	3229.33	LI820	29.26	30.7	0.9934	3256.76	0.02587	355.011	394.543	388.67	11.8901	2.53659	Rajang
20/08/2016 14:59	111.523	2.13772	26.4	3253.57	LI820	29.47	30.7	0.9934	3252.23	0.02587	355.011	394.543	388.67	11.8901	2.53258	Rajang
20/08/2016 15:00	111.523	2.1378	26.4	3274.6	LI820	29.44	30.7	0.9934	3278.02	0.02587	355.011	394.543	388.67	11.8901	2.55543	Rajang
20/08/2016 15:01	111.523	2.13788	26.4	3295.88	LI820	29.39	30.7	0.9934	3305.58	0.02587	355.011	394.543	388.67	11.8901	2.57984	Rajang
20/08/2016 15:02	111.523	2.13796	26.4	3313.94	LI820	29.4	30.7	0.9934	3323.37	0.02587	355.011	394.543	388.67	11.8901	2.5956	Rajang
20/08/2016 15:03	111.523	2.13804	26.4	3332.25	LI820	29.34	30.7	0.9934	3350.46	0.02587	355.011	394.543	388.557	11.8918	2.61998	Rajang
20/08/2016 15:04	111.523	2.13812	26.4	3341.16	LI820	29.28	30.7	0.9934	3366.54	0.02587	355.011	394.543	388.557	11.8918	2.63423	Rajang
20/08/2016 15:05	111.523	2.1382	26.4	3353.28	LI820	29.37	30.7	0.9934	3366.38	0.02587	355.011	394.543	388.557	11.8918	2.63409	Rajang
20/08/2016 15:06	111.524	2.13828	26.4	3353.29	LI820	29.51	30.7	0.9934	3347.29	0.02587	355.011	394.543	388.557	11.8918	2.61717	Rajang
20/08/2016 15:07	111.524	2.13836	26.4	3353.29	LI820	29.52	30.7	0.9935	3345.52	0.02587	355.011	394.543	388.557	11.8918	2.61557	Rajang
20/08/2016 15:08	111.524	2.13844	26.4	3347.36	LI820	29.48	30.7	0.9935	3344.73	0.02588	355.011	394.543	388.557	11.8918	2.61588	Rajang
20/08/2016 15:09	111.524	2.13853	26.4	3353.3	LI820	29.51	30.7	0.9935	3346.65	0.02588	355.011	394.543	388.557	11.8918	2.61758	Rajang
20/08/2016 15:10	111.524	2.13861	26.4	3359.49	LI820	29.6	30.7	0.9935	3339.95	0.02588	355.011	394.543	388.557	11.8918	2.61164	Rajang
20/08/2016 15:11	111.524	2.13869	26.4	3368.64	LI820	29.61	30.7	0.9935	3348.03	0.02588	355.011	394.543	388.557	11.8918	2.61881	Rajang
20/08/2016 15:12	111.524	2.13877	26.4	3383.74	LI820	29.47	30.7	0.9935	3383.05	0.02588	355.011	394.543	388.557	11.8918	2.64985	Rajang
20/08/2016 15:13	111.524	2.13885	26.4	3395.86	LI820	29.53	30.7	0.9935	3387.35	0.02588	355.011	394.543	388.557	11.8918	2.65366	Rajang
20/08/2016 15:14	111.524	2.13893	26.4	3407.99	LI820	29.66	30.7	0.9935	3380.16	0.02588	355.011	394.543	388.557	11.8918	2.64728	Rajang
20/08/2016 15:15	111.524	2.13901	26.4	3413.93	LI820	29.53	30.7	0.9935	3404.44	0.02588	355.011	394.543	388.557	11.8918	2.6688	Rajang
20/08/2016 15:16	111.524	2.13909	26.5	3420.12	LI820	29.39	30.7	0.9935	3430.5	0.02588	355.011	394.543	388.557	11.8918	2.6919	Rajang
20/08/2016 15:17	111.524	2.13917	26.5	3429.03	LI820	29.51	30.7	0.9935	3422.8	0.02588	355.011	394.543	388.557	11.8918	2.68508	Rajang
20/08/2016 15:18	111.524	2.13925	26.5	3429.03	LI820	29.59	30.7	0.9935	3411.03	0.02588	355.011	394.543	388.557	11.8918	2.67465	Rajang
20/08/2016 15:19	111.524	2.13933	26.5	3429.03	LI820	29.85	30.7	0.9935	3373.82	0.02588	355.011	394.543	388.557	11.8918	2.64166	Rajang
20/08/2016 15:20	111.524	2.13941	26.5	3429.04	LI820	30.04	30.7	0.9935	3345.99	0.02588	355.011	394.543	388.557	11.8918	2.617	Rajang
20/08/2016 15:21	111.524	2.13949	26.5	3429.04	LI820	30.19	30.7	0.9935	3325.75	0.02588	355.011	394.543	388.557	11.8918	2.59906	Rajang
20/08/2016 15:22	111.524	2.13957	26.5	3420.14	LI820	30.14	30.7	0.9935	3323.32	0.02588	355.011	394.543	388.557	11.8918	2.5969	Rajang
20/08/2016 15:23	111.525	2.13965	26.5	3401.84	LI820	30.16	30.7	0.9935	3302.88	0.02588	355.011	394.543	388.557	11.8918	2.57879	Rajang
20/08/2016 15:24	111.525	2.13974	26.5	3411	LI820	30.36	30.7	0.9935	3284.39	0.02588	355.011	394.543	388.557	11.8918	2.5624	Rajang
20/08/2016 15:25	111.525	2.13982	26.5	3411	LI820	30.61	30.7	0.9935	3250.07	0.02588	355.011	394.543	388.557	11.8918	2.53198	Rajang
20/08/2016 15:26	111.525	2.1399	26.5	3420.16	LI820	30.78	30.7	0.9935	3235.18	0.02588	355.011	394.543	388.557	11.8918	2.51878	Rajang
20/08/2016 15:27	111.525	2.13998	26.5	3432.04	LI820	30.83	30.7	0.9935	3240.22	0.02588	355.011	394.543	388.557	11.8918	2.52325	Rajang
20/08/2016 15:28	111.525	2.14006	26.5	3444.16	LI820	30.84	30.7	0.9935	3249.43	0.02588	355.011	394.543	388.444	11.8935	2.53178	Rajang
20/08/2016 15:29	111.525	2.14014	26.5	3453.32	LI820	30.85	30.7	0.9935	3256.92	0.02588	355.011	394.543	388.444	11.8935	2.53842	Rajang
20/08/2016 15:30	111.525	2.14022	26.5	3459.51	LI820	30.82	30.7	0.9935	3267.72	0.02588	355.011	394.543	388.444	11.8935	2.54799	Rajang
20/08/2016 15:31	111.525	2.1403	26.5	3465.45	LI820	30.61	30.7	0.9935	3302.18	0.02589	355.011	394.543	388.444	11.8935	2.57954	Rajang
20/08/2016 15:32	111.525	2.14038	26.5	3465.45	LI820	30.67	30.7	0.9935	3293.9	0.02589	355.011	394.543	388.444	11.8935	2.57219	Rajang
20/08/2016 15:33	111.525	2.14046	26.5	3471.64	LI820	30.79	30.7	0.9935	3282.51	0.02589	355.011	394.543	388.444	11.8935	2.56209	Rajang
20/08/2016 15:34	111.525	2.14054	26.5	3471.64	LI820	30.85	30.7	0.9935	3274.08	0.02589	355.011	394.543	388.444	11.8935	2.55462	Rajang
20/08/2016 15:35	111.525	2.14062	26.5	3471.65	LI820	30.85	30.7	0.9935	3274.87	0.02589	355.011	394.543	388.444	11.8935	2.55532	Rajang
20/08/2016 15:36	111.525	2.1407	26.5	3471.65	LI820	30.83	30.7	0.9935	3276.88	0.02589	355.011	394.543	388.444	11.8935	2.5571	Rajang
20/08/2016 15:37	111.525	2.14078	26.5	3462.5	LI820	30.83	30.7	0.9935	3268.19	0.02589	355.011	394.543	388.444	11.8935	2.54939	Rajang
20/08/2016 15:38	111.525	2.14086	26.6	3420.21	LI820	30.87	30.7	0.9935	3223.71	0.02589	355.011	394.543	388.444	11.8935	2.50995	Rajang
20/08/2016 15:39	111.525	2.14095	26.6	3368.76	LI820	30.84	30.7	0.9935	3178.8	0.02589	355.011	394.543	388.444	11.8935	2.47012	Rajang
20/08/2016 15:40	111.525	2.14103	26.6	3359.61	LI820	30.86	30.7	0.9935	3167.58	0.02589	355.011	394.543	388.444	11.8935	2.46017	Rajang
20/08/2016 15:41	111.526	2.14111	26.6	3238.4	LI820	30.66	30.7	0.9935	3079.54	0.02589	355.011	394.543	388.444	11.8935	2.3821	Rajang
20/08/2016 15:42	111.526	2.14119	26.6	3181.01	LI820	30.67	30.7	0.9935	3023.99	0.02589	355.011	394.543	388.444	11.8935	2.33283	Rajang
20/08/2016 15:43	111.526	2.14127	26.6	3181.01	LI820	30.8	30.7	0.9935	3006.88	0.02589	355.011	394.543	388.444	11.8935	2.31766	Rajang
20/08/2016 15:44	111.526	2.14135	26.6	3211.2	LI820	30.63	30.7	0.9935	3057.18	0.02589	355.011	394.543	388.444	11.8935	2.36227	Rajang
20/08/2016 15:45	111.526	2.14143	26.6	3244.6	LI820	30.7	30.7	0.9935	3079.71	0.02589	355.011	394.543	388.444	11.8935	2.38225	Rajang
20/08/2016 15:46	111.526	2.14151	26.6	3274.78	LI820	30.8	30.7	0.9935	3095.41	0.02589	355.011	394.543	388.444	11.8935	2.39617	Rajang
20/08/2016 15:47	111.526	2.14159	26.6	3302	LI820	30.81	30.7	0.9935	3120.17	0.02589	355.011	394.543	388.444	11.8935	2.41813	Rajang
20/08/2016 15:48	111.526	2.14167	26.6	3326.24	LI820	30.81	30.7	0.9936	3143.49	0.02589	355.011	394.543	388.444	11.8935	2.43877	Rajang
20/08/2016 15:49	111.526	2.14175	26.6	3344.55	LI820	30.78	30.7	0.9936	3164.94	0.02589	355.011	394.543	388.444	11.8935	2.4578	Rajang
20/08/2016 15:50	111.526	2.14183	26.6	3365.58	LI820	30.64	30.7	0.9936	3203.1	0.02589	355.011	394.543	388.444	11.8935	2.49164	Rajang
20/08/2016 15:51	111.526	2.14191	26.6	3377.71	LI820	30.63	30.7	0.9936	3216.07	0.02589	355.011	394.543	388.444	11.8935	2.50314	Rajang
20/08/2016 15:52	111.526	2.14199	26.6	3392.8	LI820	30.66	30.7	0.9936	3226.16	0.02589	355.011	394.543	388.444	11.8935	2.51209	Rajang
20/08/2016 15:53	111.526	2.14207	26.6	3398.99	LI820	30.68	30.7	0.9936	3229.99	0.0259	355.011	394.543	388.331	11.8952	2.51682	Rajang
20/08/2016 15:54	111.526	2.14216	26.6	3414.09	LI820	30.64	30.7	0.9936	3249.6	0.0259	355.011	394.543	388.331	11.8952	2.53422	Rajang
20/08/2016 15:55	111.526	2.14224	26.6	3432.15	LI820	30.71	30.7	0.9936	3256.85	0.0259	355.011	394.543	388.331	11.8952	2.54065	Rajang
20/08/2016 15:56	111.526	2.14232	26.6	3453.43	LI820	30.74	30.7	0.9936	3273.79	0.0259	355.011	394.543	388.331	11.8952	2.55568	Rajang
20/08/2016 15:57	111.526	2.1424	26.6	3465.55	LI820	30.72	30.7	0.9936	3287.69	0.0259	355.011	394.543	388.331	11.8952	2.56802	Rajang
20/08/2016 15:58	111.526	2.14248	26.6	3480.65	LI820	30.73	30.7	0.9936	3301.05	0.0259	355.011	394.543	388.331	11.8952	2.57987	Rajang
20/08/2016 15:59	111.527	2.14256	26.6	3486.84	LI820	30.39	30.7	0.9936	3354.17	0.0259	355.011	394.543	388.331	11.8952	2.627	Rajang
20/08/2016 16:00	111.527	2.14264	26.7	3498.96	LI820	30.4	30.7	0.9936	3365.41	0.0259	355.011	394.543	388.331	11.8952	2.63698	Rajang
20/08/2016 16:01	111.527	2.14272	26.7	3507.87	LI820	30.51	30.7	0.9936	3358.97	0.0259	355.011	394.543	388.331	11.8952	2.63126	Rajang
20/08/2016 16:02	111.527	2.1428	26.7	3514.06	LI820	30.53	30.7	0.9936	3361.54	0.0259	355.011	394.543	388.331	11.8952	2.63354	Rajang
20/08/2016 16:03	111.527	2.14288	26.7	3529.15	LI820	30.51	30.7	0.9936	3378.78	0.0259	355.011	394.543	388.331	11.8952	2.64884	Rajang
20/08/2016 16:04	111.527	2.14296	26.7	3538.31	LI820	30.5	30.7	0.9936	3389.36	0.0259	355.011	394.543	388.331	11.8952	2.65823	Rajang
20/08/2016 16:05	111.527	2.14304	26.7	3553.41	LI820	30.52	30.7	0.9936	3400.43	0.0259	355.011	394.543	388.331	11.8952	2.66805	Rajang
20/08/2016 16:06	111.527	2.14312	26.7	3562.56	LI820	30.51	30.7	0.9936	3411.95	0.0259	355.011	394.543	388.331	11.8952	2.67827	Rajang
20/08/2016 16:07	111.527	2.1432	26.7	3574.69	LI820	30.5	30.7	0.9936	3423.59	0.0259	355.011	394.543	388.331	11.8952	2.6886	Rajang
20/08/2016 16:08	111.527	2.14329	26.7	3586.57	LI820	30.51	30.7	0.9936	3434.26	0.0259	355.011	394.543	388.331	11.8952	2.69807	Rajang
20/08/2016 16:09	111.527	2.14337	26.7	3604.88	LI820	30.51	30.7	0.9936	3451.37	0.0259	355.011	394.543	388.331	11.8952	2.71325	Rajang
20/08/2016 16:10	111.527	2.14345	26.7	3619.97	LI820	30.52	30.7	0.9936	3464.75	0.0259	355.011	394.543	388.331	11.8952	2.72512	Rajang
20/08/2016 16:11	111.527	2.14353	26.7	3635.07	LI820	30.51	30.7	0.9936	3481.28	0.0259	355.011	394.543	388.331	11.8952	2.73979	Rajang
20/08/2016 16:12	111.527	2.14361	26.7	3644.23	LI820	30.48	30.7	0.9936	3494.92	0.0259	355.011	394.543	388.331	11.8952	2.75189	Rajang
20/08/2016 16:13	111.527	2.14369	26.7	3656.35	LI820	30.5	30.7	0.9936	3502.37	0.0259	355.011	394.543	388.331	11.8952	2.7585	Rajang
20/08/2016 16:14	111.527	2.14377	26.7	3665.51	LI820	30.46	30.7	0.9936	3517.17	0.0259	355.011	394.543	388.331	11.8952	2.77163	Rajang
20/08/2016 16:15	111.527	2.14385	26.7	3680.6	LI820	30.4	30.7	0.9936	3540.94	0.0259	355.011	394.543	388.331	11.8952	2.79272	Rajang
20/08/2016 16:16	111.528	2.14393	26.7	3695.7	LI820	30.35	30.7	0.9936	3562.81	0.02591	355.011	394.543	388.331	11.8952	2.81321	Rajang
20/08/2016 16:17	111.528	2.14401	26.7	3710.79	LI820	30.36	30.7	0.9936	3575.78	0.02591	355.011	394.543	388.218	11.897	2.82514	Rajang
20/08/2016 16:18	111.528	2.14409	26.7	3725.89	LI820	30.38	30.7	0.9936	3587.67	0.02591	355.011	394.543	388.218	11.897	2.83569	Rajang
20/08/2016 16:19	111.528	2.14417	26.7	3744.2	LI820	30.4	30.7	0.9936	3601.91	0.02591	355.011	394.543	388.218	11.897	2.84834	Rajang
20/08/2016 16:20	111.528	2.14425	26.7	3756.33	LI820	30.41	30.7	0.9936	3612.96	0.02591	355.011	394.543	388.218	11.897	2.85814	Rajang
20/08/2016 16:21	111.528	2.14433	26.7	3768.45	LI820	30.35	30.7	0.9936	3634.15	0.02591	355.011	394.543	388.218	11.897	2.87696	Rajang
20/08/2016 16:22	111.528	2.14441	26.8	3786.52	LI820	30.31	30.7	0.9936	3657.86	0.02591	355.011	394.543	388.218	11.897	2.89801	Rajang
20/08/2016 16:23	111.528	2.1445	26.8	3798.64	LI820	30.25	30.7	0.9936	3678.97	0.02591	355.011	394.543	388.218	11.897	2.91675	Rajang
20/08/2016 16:24	111.528	2.14458	26.8	3810.77	LI820	30.24	30.7	0.9936	3691.18	0.02591	355.011	394.543	388.218	11.897	2.92759	Rajang
20/08/2016 16:25	111.528	2.14466	26.8	3825.87	LI820	30.22	30.7	0.9936	3709.46	0.02591	355.011	394.543	388.218	11.897	2.94381	Rajang
20/08/2016 16:26	111.528	2.14474	26.8	3837.99	LI820	30.21	30.7	0.9936	3722.45	0.02591	355.011	394.543	388.218	11.897	2.95535	Rajang
20/08/2016 16:27	111.528	2.14482	26.8	3847.15	LI820	30.23	30.7	0.9936	3728.46	0.02591	355.011	394.543	388.218	11.897	2.96068	Rajang
20/08/2016 16:28	111.528	2.1449	26.8	3859.28	LI820	30.27	30.7	0.9937	3733.73	0.02591	355.011	394.543	388.218	11.897	2.96532	Rajang
20/08/2016 16:29	111.528	2.14498	26.8	3871.4	LI820	30.28	30.7	0.9937	3744.14	0.02591	355.011	394.543	388.218	11.897	2.97457	Rajang
20/08/2016 16:30	111.528	2.14506	26.8	3880.31	LI820	30.28	30.7	0.9937	3753.05	0.02591	355.011	394.543	388.218	11.897	2.98248	Rajang
20/08/2016 16:31	111.528	2.14514	26.8	3868.2	LI820	30.1	30.7	0.9937	3770.07	0.02591	355.011	394.543	388.218	11.897	2.99759	Rajang
20/08/2016 16:32	111.528	2.14522	26.8	3789.53	LI820	29.95	30.7	0.9937	3715.58	0.02591	355.011	394.543	388.218	11.897	2.94921	Rajang
20/08/2016 16:33	111.528	2.1453	26.8	3783.6	LI820	29.84	30.7	0.9937	3728.13	0.02591	355.011	394.543	388.218	11.897	2.96035	Rajang
20/08/2016 16:34	111.529	2.14538	26.8	3692.81	LI820	29.74	30.7	0.9937	3653.37	0.02591	355.011	394.543	388.218	11.897	2.89398	Rajang
20/08/2016 16:35	111.529	2.14546	26.8	3692.81	LI820	29.5	30.7	0.9937	3691.66	0.02591	355.011	394.543	388.218	11.897	2.92798	Rajang
20/08/2016 16:36	111.529	2.14554	26.8	3610.93	LI820	29.29	30.7	0.9937	3642.16	0.02591	355.011	394.543	388.218	11.897	2.88403	Rajang
20/08/2016 16:37	111.529	2.14562	26.8	3644.33	LI820	29.19	30.7	0.9937	3690.48	0.02591	355.011	394.543	388.218	11.897	2.92693	Rajang
20/08/2016 16:38	111.529	2.14571	26.8	3692.83	LI820	29.19	30.7	0.9937	3740.83	0.02591	355.011	394.543	388.218	11.897	2.97163	Rajang
20/08/2016 16:39	111.529	2.14579	26.8	3738.1	LI820	29.13	30.7	0.9937	3796.62	0.02592	355.011	394.543	388.218	11.897	3.02232	Rajang
20/08/2016 16:40	111.529	2.14587	26.8	3780.41	LI820	29.04	30.7	0.9937	3853.71	0.02592	355.011	394.543	388.218	11.897	3.07302	Rajang
20/08/2016 16:41	111.529	2.14595	26.8	3820	LI820	28.89	30.7	0.9937	3918.18	0.02592	355.011	394.543	388.218	11.897	3.13028	Rajang
20/08/2016 16:42	111.529	2.14603	26.8	3853.16	LI820	28.81	30.7	0.9937	3965.11	0.02592	355.011	394.543	388.105	11.8987	3.17242	Rajang
20/08/2016 16:43	111.529	2.14611	26.8	3886.56	LI820	28.77	30.7	0.9937	4006.81	0.02592	355.011	394.543	388.105	11.8987	3.20946	Rajang
20/08/2016 16:44	111.529	2.14619	26.9	3919.71	LI820	28.74	30.7	0.9937	4046.04	0.02592	355.011	394.543	388.105	11.8987	3.24431	Rajang
20/08/2016 16:45	111.529	2.14627	26.9	3946.93	LI820	28.72	30.7	0.9937	4077.78	0.02592	355.011	394.543	388.105	11.8987	3.2725	Rajang
20/08/2016 16:46	111.529	2.14635	26.9	3971.18	LI820	28.69	30.7	0.9937	4107.08	0.02592	355.011	394.543	388.105	11.8987	3.29852	Rajang
20/08/2016 16:47	111.529	2.14643	26.9	3995.43	LI820	28.6	30.7	0.9937	4147.88	0.02592	355.011	394.543	388.105	11.8987	3.33476	Rajang
20/08/2016 16:48	111.529	2.14651	26.9	4019.68	LI820	28.56	30.7	0.9937	4179.87	0.02592	355.011	394.543	388.105	11.8987	3.36318	Rajang
20/08/2016 16:49	111.529	2.14659	26.9	4040.96	LI820	28.55	30.7	0.9937	4204.42	0.02592	355.011	394.543	388.105	11.8987	3.38498	Rajang
20/08/2016 16:50	111.529	2.14667	26.9	4061.99	LI820	28.5	30.7	0.9937	4234.92	0.02592	355.011	394.543	388.105	11.8987	3.41207	Rajang
20/08/2016 16:51	111.53	2.14675	26.9	4089.21	LI820	28.49	30.7	0.9937	4265.24	0.02592	355.011	394.543	388.105	11.8987	3.43901	Rajang
20/08/2016 16:52	111.53	2.14683	26.9	4116.68	LI820	28.47	30.7	0.9937	4298.68	0.02592	355.011	394.543	388.105	11.8987	3.46871	Rajang
20/08/2016 16:53	111.53	2.14692	26.9	4140.68	LI820	28.47	30.7	0.9937	4322.06	0.02592	355.011	394.543	388.105	11.8987	3.48948	Rajang
20/08/2016 16:54	111.53	2.147	26.9	4168.15	LI820	28.49	30.7	0.9937	4347.14	0.02592	355.011	394.543	388.105	11.8987	3.51175	Rajang
20/08/2016 16:55	111.53	2.14708	26.9	4180.27	LI820	28.49	30.7	0.9937	4360.86	0.02592	355.011	394.543	388.105	11.8987	3.52394	Rajang
20/08/2016 16:56	111.53	2.14716	26.9	4198.34	LI820	28.42	30.7	0.9937	4392.01	0.02592	355.011	394.543	388.105	11.8987	3.55161	Rajang
20/08/2016 16:57	111.53	2.14724	26.9	4222.59	LI820	28.42	30.7	0.9937	4417.12	0.02592	355.011	394.543	388.105	11.8987	3.57391	Rajang
20/08/2016 16:58	111.53	2.14732	26.9	4243.62	LI820	28.45	30.7	0.9937	4434.95	0.02592	355.011	394.543	388.105	11.8987	3.58975	Rajang
20/08/2016 16:59	111.53	2.1474	26.9	4271.09	LI820	28.48	30.7	0.9937	4457.38	0.02592	355.011	394.543	388.105	11.8987	3.60967	Rajang
20/08/2016 17:00	111.53	2.14748	26.9	4292.12	LI820	28.47	30.7	0.9937	4481.06	0.02592	355.011	394.543	388.105	11.8987	3.6307	Rajang
20/08/2016 17:01	111.53	2.14756	26.9	4316.37	LI820	28.49	30.7	0.9937	4503.5	0.02592	355.011	394.543	388.105	11.8987	3.65064	Rajang
20/08/2016 17:02	111.53	2.14764	26.9	4334.44	LI820	28.49	30.7	0.9937	4521	0.02593	355.011	394.543	388.105	11.8987	3.6676	Rajang
20/08/2016 17:03	111.53	2.14772	26.9	4349.78	LI820	28.45	30.7	0.9937	4545.72	0.02593	355.011	394.543	388.105	11.8987	3.68956	Rajang
20/08/2016 17:04	111.53	2.1478	26.9	4382.94	LI820	28.4	30.7	0.9937	4590.27	0.02593	355.011	394.543	388.105	11.8987	3.72915	Rajang
20/08/2016 17:05	111.53	2.14788	26.9	4407.19	LI820	28.39	30.7	0.9937	4616.61	0.02593	355.011	394.543	388.105	11.8987	3.75255	Rajang
20/08/2016 17:06	111.53	2.14796	27	4440.59	LI820	28.42	30.7	0.9937	4645.09	0.02593	355.011	394.543	388.105	11.8987	3.77786	Rajang
20/08/2016 17:07	111.53	2.14804	27	4464.84	LI820	28.48	30.7	0.9937	4659.85	0.02593	355.011	394.543	387.992	11.9004	3.79153	Rajang
20/08/2016 17:08	111.53	2.14813	27	4482.91	LI820	28.45	30.7	0.9937	4683.98	0.02593	355.011	394.543	387.992	11.9004	3.81297	Rajang
20/08/2016 17:09	111.531	2.14821	27	4504.19	LI820	28.37	30.7	0.9938	4722.55	0.02593	355.011	394.543	387.992	11.9004	3.84721	Rajang
20/08/2016 17:10	111.531	2.14829	27	4522.26	LI820	28.18	30.7	0.9938	4779.46	0.02593	355.011	394.543	387.992	11.9004	3.89779	Rajang
20/08/2016 17:11	111.531	2.14837	27	4540.32	LI820	28.01	30.7	0.9938	4834.48	0.02593	355.011	394.543	387.992	11.9004	3.94669	Rajang
20/08/2016 17:12	111.531	2.14845	27	4561.6	LI820	27.91	30.7	0.9938	4877.6	0.02593	355.011	394.543	387.992	11.9004	3.98501	Rajang
20/08/2016 17:13	111.531	2.14853	27	4588.82	LI820	27.81	30.7	0.9938	4926.72	0.02593	355.011	394.543	387.992	11.9004	4.02866	Rajang
20/08/2016 17:14	111.531	2.14861	27	4610.11	LI820	27.76	30.7	0.9938	4961.76	0.02593	355.011	394.543	387.992	11.9004	4.0598	Rajang
20/08/2016 17:15	111.531	2.14869	27	4625.2	LI820	27.68	30.7	0.9938	4994.91	0.02593	355.011	394.543	387.992	11.9004	4.08926	Rajang
20/08/2016 17:16	111.531	2.14877	27	4649.45	LI820	27.63	30.7	0.9938	5031.9	0.02593	355.011	394.543	387.992	11.9004	4.12213	Rajang
20/08/2016 17:17	111.531	2.14885	27	4667.52	LI820	27.57	30.7	0.9938	5063.52	0.02593	355.011	394.543	387.992	11.9004	4.15023	Rajang
20/08/2016 17:18	111.531	2.14893	27	4691.77	LI820	27.55	30.7	0.9938	5095.13	0.02593	355.011	394.543	387.992	11.9004	4.17833	Rajang
20/08/2016 17:19	111.531	2.14901	27	4716.02	LI820	27.53	30.7	0.9938	5124.42	0.02593	355.011	394.543	387.992	11.9004	4.20436	Rajang
20/08/2016 17:20	111.531	2.14909	27	4734.34	LI820	27.47	30.7	0.9938	5157.37	0.02593	355.011	394.543	387.992	11.9004	4.23364	Rajang
20/08/2016 17:21	111.531	2.14917	27	4752.4	LI820	27.34	30.7	0.9938	5205.71	0.02593	355.011	394.543	387.992	11.9004	4.2766	Rajang
20/08/2016 17:22	111.531	2.14925	27	4767.5	LI820	27.18	30.7	0.9938	5256.63	0.02593	355.011	394.543	387.992	11.9004	4.32185	Rajang
20/08/2016 17:23	111.531	2.14934	27	4782.6	LI820	27.19	30.7	0.9938	5273.12	0.02593	355.011	394.543	387.992	11.9004	4.33651	Rajang
20/08/2016 17:24	111.531	2.14942	27	4800.91	LI820	27.24	30.7	0.9938	5281.85	0.02594	355.011	394.543	387.992	11.9004	4.34594	Rajang
20/08/2016 17:25	111.531	2.1495	27	4818.98	LI820	27.28	30.7	0.9938	5292.38	0.02594	355.011	394.543	387.992	11.9004	4.3553	Rajang
20/08/2016 17:26	111.531	2.14958	27	4837.04	LI820	27.28	30.7	0.9938	5310.61	0.02594	355.011	394.543	387.992	11.9004	4.37151	Rajang
20/08/2016 17:27	111.532	2.14966	27	4861.29	LI820	27.28	30.7	0.9938	5338.48	0.02594	355.011	394.543	387.992	11.9004	4.39629	Rajang
20/08/2016 17:28	111.532	2.14974	27.1	4879.61	LI820	27.26	30.7	0.9938	5362.13	0.02594	355.011	394.543	387.992	11.9004	4.41731	Rajang
20/08/2016 17:29	111.532	2.14982	27.1	4891.74	LI820	27.25	30.7	0.9938	5379	0.02594	355.011	394.543	387.992	11.9004	4.43231	Rajang
20/08/2016 17:30	111.532	2.1499	27.1	4909.8	LI820	27.18	30.7	0.9938	5414.38	0.02594	355.011	394.543	387.992	11.9004	4.46377	Rajang
20/08/2016 17:31	111.532	2.14998	27.1	4928.12	LI820	27.09	30.7	0.9938	5455.59	0.02594	355.011	394.543	387.992	11.9004	4.5004	Rajang
20/08/2016 17:32	111.532	2.15006	27.1	4940	LI820	27.08	30.7	0.9938	5470.94	0.02594	355.011	394.543	387.879	11.9022	4.51471	Rajang
20/08/2016 17:33	111.532	2.15014	27.1	4955.34	LI820	27.08	30.7	0.9938	5486.27	0.02594	355.011	394.543	387.879	11.9022	4.52834	Rajang
20/08/2016 17:34	111.532	2.15022	27.1	4973.41	LI820	27.13	30.7	0.9938	5497.09	0.02594	355.011	394.543	387.879	11.9022	4.53796	Rajang
20/08/2016 17:35	111.532	2.1503	27.1	4994.69	LI820	27.24	30.7	0.9938	5494.96	0.02594	355.011	394.543	387.879	11.9022	4.53607	Rajang
20/08/2016 17:36	111.532	2.15038	27.1	5012.76	LI820	27.31	30.7	0.9938	5498.27	0.02594	355.011	394.543	387.879	11.9022	4.53901	Rajang
20/08/2016 17:37	111.532	2.15046	27.1	5024.89	LI820	27.35	30.7	0.9938	5502.18	0.02594	355.011	394.543	387.879	11.9022	4.54249	Rajang
20/08/2016 17:38	111.532	2.15055	27.1	5031.08	LI820	27.39	30.7	0.9938	5500.07	0.02594	355.011	394.543	387.879	11.9022	4.54061	Rajang
20/08/2016 17:39	111.532	2.15063	27.1	5058.3	LI820	27.43	30.7	0.9938	5520.11	0.02594	355.011	394.543	387.879	11.9022	4.55843	Rajang
20/08/2016 17:40	111.532	2.15071	27.1	5070.43	LI820	27.45	30.7	0.9938	5527.61	0.02594	355.011	394.543	387.879	11.9022	4.5651	Rajang
20/08/2016 17:41	111.532	2.15079	27.1	5088.5	LI820	27.47	30.7	0.9938	5544.09	0.02594	355.011	394.543	387.879	11.9022	4.57975	Rajang
20/08/2016 17:42	111.532	2.15087	27.1	5097.66	LI820	27.39	30.7	0.9938	5571.23	0.02594	355.011	394.543	387.879	11.9022	4.60388	Rajang
20/08/2016 17:43	111.532	2.15095	27.1	5115.73	LI820	27.35	30.7	0.9938	5600.14	0.02594	355.011	394.543	387.879	11.9022	4.62959	Rajang
20/08/2016 17:44	111.533	2.15103	27.1	5134.04	LI820	27.37	30.7	0.9938	5615.94	0.02594	355.011	394.543	387.879	11.9022	4.64364	Rajang
20/08/2016 17:45	111.533	2.15111	27.1	5142.95	LI820	27.46	30.7	0.9938	5606.11	0.02594	355.011	394.543	387.879	11.9022	4.6349	Rajang
20/08/2016 17:46	111.533	2.15119	27.1	5155.08	LI820	27.5	30.7	0.9938	5607.88	0.02594	355.011	394.543	387.879	11.9022	4.63647	Rajang
20/08/2016 17:47	111.533	2.15127	27.1	5164.24	LI820	27.53	30.7	0.9938	5612.01	0.02595	355.011	394.543	387.879	11.9022	4.64193	Rajang
20/08/2016 17:48	111.533	2.15135	27.1	5176.37	LI820	27.63	30.7	0.9938	5599.91	0.02595	355.011	394.543	387.879	11.9022	4.63117	Rajang
20/08/2016 17:49	111.533	2.15143	27.1	5188.5	LI820	27.72	30.7	0.9938	5591.86	0.02595	355.011	394.543	387.879	11.9022	4.62401	Rajang
20/08/2016 17:50	111.533	2.15151	27.2	5200.63	LI820	27.79	30.7	0.9939	5589.99	0.02595	355.011	394.543	387.879	11.9022	4.62231	Rajang
20/08/2016 17:51	111.533	2.15159	27.2	5218.7	LI820	27.84	30.7	0.9939	5598.35	0.02595	355.011	394.543	387.879	11.9022	4.62975	Rajang
20/08/2016 17:52	111.533	2.15167	27.2	5233.8	LI820	27.88	30.7	0.9939	5604.58	0.02595	355.011	394.543	387.879	11.9022	4.63529	Rajang
20/08/2016 17:53	111.533	2.15176	27.2	5245.93	LI820	27.9	30.7	0.9939	5612.78	0.02595	355.011	394.543	387.879	11.9022	4.64258	Rajang
20/08/2016 17:54	111.533	2.15184	27.2	5258.06	LI820	27.91	30.7	0.9939	5623.4	0.02595	355.011	394.543	387.879	11.9022	4.65203	Rajang
20/08/2016 17:55	111.533	2.15192	27.2	5270.18	LI820	27.93	30.7	0.9939	5629.8	0.02595	355.011	394.543	387.879	11.9022	4.65772	Rajang
20/08/2016 17:56	111.533	2.152	27.2	5282.31	LI820	27.92	30.7	0.9939	5645.64	0.02595	355.011	394.543	387.766	11.9039	4.67249	Rajang
20/08/2016 17:57	111.533	2.15208	27.2	5294.44	LI820	27.89	30.7	0.9939	5665.24	0.02595	355.011	394.543	387.766	11.9039	4.68993	Rajang
20/08/2016 17:58	111.533	2.15216	27.2	5306.57	LI820	27.91	30.7	0.9939	5673.84	0.02595	355.011	394.543	387.766	11.9039	4.69758	Rajang
20/08/2016 17:59	111.533	2.15224	27.2	5291.49	LI820	27.92	30.7	0.9939	5654.81	0.02595	355.011	394.543	387.766	11.9039	4.68065	Rajang
20/08/2016 18:00	111.533	2.15232	27.2	5327.86	LI820	27.95	30.7	0.9939	5687.38	0.02595	355.011	394.543	387.766	11.9039	4.70963	Rajang
20/08/2016 18:01	111.533	2.1524	27.2	5348.9	LI820	27.98	30.7	0.9939	5701.73	0.02595	355.011	394.543	387.766	11.9039	4.72239	Rajang
20/08/2016 18:02	111.534	2.15248	27.2	5348.91	LI820	27.97	30.7	0.9939	5706.15	0.02595	355.011	394.543	387.766	11.9039	4.72633	Rajang
20/08/2016 18:03	111.534	2.15256	27.2	5355.1	LI820	27.97	30.7	0.9939	5712.3	0.02595	355.011	394.543	387.766	11.9039	4.7318	Rajang
20/08/2016 18:04	111.534	2.15264	27.2	5364.01	LI820	28.03	30.7	0.9939	5707.48	0.02595	355.011	394.543	387.766	11.9039	4.72751	Rajang
20/08/2016 18:05	111.534	2.15272	27.2	5376.14	LI820	28.11	30.7	0.9939	5700.42	0.02595	355.011	394.543	387.766	11.9039	4.72123	Rajang
20/08/2016 18:06	111.534	2.1528	27.2	5388.27	LI820	28.2	30.7	0.9939	5692.15	0.02595	355.011	394.543	387.766	11.9039	4.71387	Rajang
20/08/2016 18:07	111.534	2.15288	27.2	5400.4	LI820	28.23	30.7	0.9939	5698	0.02595	355.011	394.543	387.766	11.9039	4.71908	Rajang
20/08/2016 18:08	111.534	2.15297	27.2	5409.56	LI820	28.23	30.7	0.9939	5706.22	0.02595	355.011	394.543	387.766	11.9039	4.72639	Rajang
20/08/2016 18:09	111.534	2.15305	27.2	5415.51	LI820	28.24	30.7	0.9939	5711.59	0.02595	355.011	394.543	387.766	11.9039	4.73117	Rajang
20/08/2016 18:10	111.534	2.15313	27.2	5421.7	LI820	28.24	30.7	0.9939	5717.75	0.02596	355.011	394.543	387.766	11.9039	4.73847	Rajang
20/08/2016 18:11	111.534	2.15321	27.2	5427.64	LI820	28.22	30.7	0.9939	5728.57	0.02596	355.011	394.543	387.766	11.9039	4.7481	Rajang
20/08/2016 18:12	111.534	2.15329	27.3	5436.8	LI820	28.2	30.7	0.9939	5742.7	0.02596	355.011	394.543	387.766	11.9039	4.76068	Rajang
20/08/2016 18:13	111.534	2.15337	27.3	5442.75	LI820	28.2	30.7	0.9939	5750.26	0.02596	355.011	394.543	387.766	11.9039	4.7674	Rajang
20/08/2016 18:14	111.534	2.15345	27.3	5442.75	LI820	28.24	30.7	0.9939	5740.98	0.02596	355.011	394.543	387.766	11.9039	4.75915	Rajang
20/08/2016 18:15	111.534	2.15353	27.3	5451.92	LI820	28.28	30.7	0.9939	5739.71	0.02596	355.011	394.543	387.766	11.9039	4.75802	Rajang
20/08/2016 18:16	111.534	2.15361	27.3	5461.08	LI820	28.34	30.7	0.9939	5735.62	0.02596	355.011	394.543	387.766	11.9039	4.75438	Rajang
20/08/2016 18:17	111.534	2.15369	27.3	5473.21	LI820	28.4	30.7	0.9939	5733.87	0.02596	355.011	394.543	387.766	11.9039	4.75282	Rajang
20/08/2016 18:18	111.534	2.15377	27.3	5473.21	LI820	28.45	30.7	0.9939	5721.68	0.02596	355.011	394.543	387.766	11.9039	4.74197	Rajang
20/08/2016 18:19	111.535	2.15385	27.3	5473.22	LI820	28.47	30.7	0.9939	5715.73	0.02596	355.011	394.543	387.766	11.9039	4.73667	Rajang
20/08/2016 18:20	111.535	2.15393	27.3	5482.38	LI820	28.45	30.7	0.9939	5730.17	0.02596	355.011	394.543	387.766	11.9039	4.74952	Rajang
20/08/2016 18:21	111.535	2.15401	27.3	5491.29	LI820	28.43	30.7	0.9939	5745.59	0.02596	355.011	394.543	387.653	11.9056	4.76394	Rajang
20/08/2016 18:22	111.535	2.1541	27.3	5491.3	LI820	28.44	30.7	0.9939	5742.37	0.02596	355.011	394.543	387.653	11.9056	4.76108	Rajang
20/08/2016 18:23	111.535	2.15418	27.3	5503.43	LI820	28.41	30.7	0.9939	5761.45	0.02596	355.011	394.543	387.653	11.9056	4.77806	Rajang
20/08/2016 18:24	111.535	2.15426	27.3	5512.59	LI820	28.4	30.7	0.9939	5774	0.02596	355.011	394.543	387.653	11.9056	4.78923	Rajang
20/08/2016 18:25	111.535	2.15434	27.3	5521.75	LI820	28.34	30.7	0.9939	5798.17	0.02596	355.011	394.543	387.653	11.9056	4.81075	Rajang
20/08/2016 18:26	111.535	2.15442	27.3	5530.67	LI820	28.29	30.7	0.9939	5820.67	0.02596	355.011	394.543	387.653	11.9056	4.83077	Rajang
20/08/2016 18:27	111.535	2.1545	27.3	5536.86	LI820	28.29	30.7	0.9939	5827.38	0.02596	355.011	394.543	387.653	11.9056	4.83675	Rajang
20/08/2016 18:28	111.535	2.15458	27.3	5542.8	LI820	28.3	30.7	0.9939	5831.8	0.02596	355.011	394.543	387.653	11.9056	4.84068	Rajang
20/08/2016 18:29	111.535	2.15466	27.3	5549	LI820	28.31	30.7	0.9939	5836.4	0.02596	355.011	394.543	387.653	11.9056	4.84477	Rajang
20/08/2016 18:30	111.535	2.15474	27.3	5554.94	LI820	28.27	30.7	0.9939	5850.27	0.02596	355.011	394.543	387.653	11.9056	4.85712	Rajang
20/08/2016 18:31	111.535	2.15482	27.3	5536.89	LI820	28.24	30.7	0.994	5840.56	0.02596	355.011	394.543	387.653	11.9056	4.84844	Rajang
20/08/2016 18:32	111.535	2.1549	27.3	5561.14	LI820	28.21	30.7	0.994	5872.26	0.02596	355.011	394.543	387.653	11.9056	4.87666	Rajang
20/08/2016 18:33	111.535	2.15498	27.3	5567.08	LI820	28.22	30.7	0.994	5875.69	0.02597	355.011	394.543	387.653	11.9056	4.88159	Rajang
20/08/2016 18:34	111.535	2.15506	27.4	5567.09	LI820	28.23	30.7	0.994	5873.58	0.02597	355.011	394.543	387.653	11.9056	4.87971	Rajang
20/08/2016 18:35	111.535	2.15514	27.4	5567.1	LI820	28.26	30.7	0.994	5867.46	0.02597	355.011	394.543	387.653	11.9056	4.87426	Rajang
20/08/2016 18:36	111.535	2.15522	27.4	5576.26	LI820	28.31	30.7	0.994	5865.47	0.02597	355.011	394.543	387.653	11.9056	4.87249	Rajang
20/08/2016 18:37	111.536	2.15531	27.4	5576.27	LI820	28.33	30.7	0.994	5859.64	0.02597	355.011	394.543	387.653	11.9056	4.8673	Rajang
20/08/2016 18:38	111.536	2.15539	27.4	5570.09	LI820	28.33	30.7	0.994	5854.08	0.02597	355.011	394.543	387.653	11.9056	4.86235	Rajang
20/08/2016 18:39	111.536	2.15547	27.4	5570.09	LI820	28.37	30.7	0.994	5843.6	0.02597	355.011	394.543	387.653	11.9056	4.85302	Rajang
20/08/2016 18:40	111.536	2.15555	27.4	5564.16	LI820	28.41	30.7	0.994	5827.98	0.02597	355.011	394.543	387.653	11.9056	4.83911	Rajang
20/08/2016 18:41	111.536	2.15563	27.4	5579.26	LI820	28.46	30.7	0.994	5831.14	0.02597	355.011	394.543	387.653	11.9056	4.84192	Rajang
20/08/2016 18:42	111.536	2.15571	27.4	5579.27	LI820	28.57	30.7	0.994	5803.47	0.02597	355.011	394.543	387.653	11.9056	4.81728	Rajang
20/08/2016 18:43	111.536	2.15579	27.4	5579.27	LI820	28.61	30.7	0.994	5795.29	0.02597	355.011	394.543	387.653	11.9056	4.81	Rajang
20/08/2016 18:44	111.536	2.15587	27.4	5585.47	LI820	28.58	30.7	0.994	5808.37	0.02597	355.011	394.543	387.653	11.9056	4.82165	Rajang
20/08/2016 18:45	111.536	2.15595	27.4	5585.47	LI820	28.62	30.7	0.994	5797.4	0.02597	355.011	394.543	387.653	11.9056	4.81188	Rajang
20/08/2016 18:46	111.536	2.15603	27.4	5594.39	LI820	28.65	30.7	0.994	5801.12	0.02597	355.011	394.543	387.541	11.9074	4.81589	Rajang
20/08/2016 18:47	111.536	2.15611	27.4	5594.39	LI820	28.58	30.7	0.994	5818.05	0.02597	355.011	394.543	387.541	11.9074	4.83097	Rajang
20/08/2016 18:48	111.536	2.15619	27.4	5603.56	LI820	28.45	30.7	0.994	5858.81	0.02597	355.011	394.543	387.541	11.9074	4.86727	Rajang
20/08/2016 18:49	111.536	2.15627	27.4	5609.5	LI820	28.31	30.7	0.994	5900.34	0.02597	355.011	394.543	387.541	11.9074	4.90426	Rajang
20/08/2016 18:50	111.536	2.15635	27.4	5609.51	LI820	28.23	30.7	0.994	5920.04	0.02597	355.011	394.543	387.541	11.9074	4.9218	Rajang
20/08/2016 18:51	111.536	2.15643	27.4	5609.51	LI820	28.21	30.7	0.994	5925.24	0.02597	355.011	394.543	387.541	11.9074	4.92643	Rajang
20/08/2016 18:52	111.536	2.15652	27.4	5609.52	LI820	28.2	30.7	0.994	5928.15	0.02597	355.011	394.543	387.541	11.9074	4.92902	Rajang
20/08/2016 18:53	111.536	2.1566	27.4	5609.53	LI820	28.26	30.7	0.994	5910.88	0.02597	355.011	394.543	387.541	11.9074	4.91364	Rajang
20/08/2016 18:54	111.536	2.15668	27.4	5609.53	LI820	28.36	30.7	0.994	5887.31	0.02597	355.011	394.543	387.541	11.9074	4.89265	Rajang
20/08/2016 18:55	111.537	2.15676	27.4	5609.54	LI820	28.42	30.7	0.994	5871.63	0.02598	355.011	394.543	387.541	11.9074	4.88057	Rajang
20/08/2016 18:56	111.537	2.15684	27.5	5609.55	LI820	28.44	30.7	0.994	5866.34	0.02598	355.011	394.543	387.541	11.9074	4.87585	Rajang
20/08/2016 18:57	111.537	2.15692	27.5	5609.55	LI820	28.45	30.7	0.994	5864.31	0.02598	355.011	394.543	387.541	11.9074	4.87404	Rajang
20/08/2016 18:58	111.537	2.157	27.5	5609.56	LI820	28.43	30.7	0.994	5868.58	0.02598	355.011	394.543	387.541	11.9074	4.87785	Rajang
20/08/2016 18:59	111.537	2.15708	27.5	5609.57	LI820	28.43	30.7	0.994	5868.34	0.02598	355.011	394.543	387.541	11.9074	4.87763	Rajang
20/08/2016 19:00	111.537	2.15716	27.5	5609.57	LI820	28.41	30.7	0.994	5873.56	0.02598	355.011	394.543	387.541	11.9074	4.88229	Rajang
20/08/2016 19:01	111.537	2.15724	27.5	5603.64	LI820	28.41	30.7	0.994	5867.07	0.02598	355.011	394.543	387.541	11.9074	4.8765	Rajang
20/08/2016 19:02	111.537	2.15732	27.5	5603.65	LI820	28.49	30.7	0.994	5848	0.02598	355.011	394.543	387.541	11.9074	4.85951	Rajang
20/08/2016 19:03	111.537	2.1574	27.5	5603.65	LI820	28.52	30.7	0.994	5840.37	0.02598	355.011	394.543	387.541	11.9074	4.85272	Rajang
20/08/2016 19:04	111.537	2.15748	27.5	5597.47	LI820	28.53	30.7	0.994	5831.55	0.02598	355.011	394.543	387.541	11.9074	4.84486	Rajang
20/08/2016 19:05	111.537	2.15756	27.5	5597.48	LI820	28.63	30.7	0.994	5809.02	0.02598	355.011	394.543	387.541	11.9074	4.82478	Rajang
20/08/2016 19:06	111.537	2.15764	27.5	5591.55	LI820	28.65	30.7	0.994	5796.35	0.02598	355.011	394.543	387.541	11.9074	4.8135	Rajang
20/08/2016 19:07	111.537	2.15773	27.5	5585.62	LI820	28.72	30.7	0.994	5772.39	0.02598	355.011	394.543	387.541	11.9074	4.79215	Rajang
20/08/2016 19:08	111.537	2.15781	27.5	5585.62	LI820	28.82	30.7	0.994	5749.13	0.02598	355.011	394.543	387.541	11.9074	4.77143	Rajang
20/08/2016 19:09	111.537	2.15789	27.5	5585.63	LI820	28.75	30.7	0.994	5766.69	0.02598	355.011	394.543	387.541	11.9074	4.78707	Rajang
20/08/2016 19:10	111.537	2.15797	27.5	5576.48	LI820	28.7	30.7	0.994	5768.17	0.02598	355.011	394.543	387.541	11.9074	4.78839	Rajang
20/08/2016 19:11	111.537	2.15805	27.5	5561.4	LI820	28.61	30.7	0.9941	5775.12	0.02598	355.011	394.543	387.428	11.9091	4.79524	Rajang
20/08/2016 19:12	111.538	2.15813	27.5	5552.25	LI820	28.59	30.7	0.9941	5770.47	0.02598	355.011	394.543	387.428	11.9091	4.7911	Rajang
20/08/2016 19:13	111.538	2.15821	27.5	5534.19	LI820	28.57	30.7	0.9941	5756.23	0.02598	355.011	394.543	387.428	11.9091	4.77841	Rajang
20/08/2016 19:14	111.538	2.15829	27.5	5518.86	LI820	28.55	30.7	0.9941	5745.34	0.02598	355.011	394.543	387.428	11.9091	4.76871	Rajang
20/08/2016 19:15	111.538	2.15837	27.5	5506.74	LI820	28.51	30.7	0.9941	5741.28	0.02598	355.011	394.543	387.428	11.9091	4.76509	Rajang
20/08/2016 19:16	111.538	2.15845	27.5	5500.81	LI820	28.41	30.7	0.9941	5760.37	0.02598	355.011	394.543	387.428	11.9091	4.7821	Rajang
20/08/2016 19:17	111.538	2.15853	27.5	5488.69	LI820	28.27	30.7	0.9941	5779.6	0.02598	355.011	394.543	387.428	11.9091	4.79924	Rajang
20/08/2016 19:18	111.538	2.15861	27.6	5479.54	LI820	28.2	30.7	0.9941	5788.49	0.02599	355.011	394.543	387.428	11.9091	4.80901	Rajang
20/08/2016 19:19	111.538	2.15869	27.6	5473.61	LI820	28.22	30.7	0.9941	5778.23	0.02599	355.011	394.543	387.428	11.9091	4.79986	Rajang
20/08/2016 19:20	111.538	2.15877	27.6	5473.61	LI820	28.23	30.7	0.9941	5775.02	0.02599	355.011	394.543	387.428	11.9091	4.797	Rajang
20/08/2016 19:21	111.538	2.15885	27.6	5461.5	LI820	28.24	30.7	0.9941	5758.23	0.02599	355.011	394.543	387.428	11.9091	4.78203	Rajang
20/08/2016 19:22	111.538	2.15894	27.6	5455.32	LI820	28.28	30.7	0.9941	5742.96	0.02599	355.011	394.543	387.428	11.9091	4.76842	Rajang
20/08/2016 19:23	111.538	2.15902	27.6	5410.04	LI820	28.27	30.7	0.9941	5698.75	0.02599	355.011	394.543	387.428	11.9091	4.72901	Rajang
20/08/2016 19:24	111.538	2.1591	27.6	5437.27	LI820	28.21	30.7	0.9941	5742.31	0.02599	355.011	394.543	387.428	11.9091	4.76784	Rajang
20/08/2016 19:25	111.538	2.15918	27.6	5437.27	LI820	28.2	30.7	0.9941	5743.32	0.02599	355.011	394.543	387.428	11.9091	4.76874	Rajang
20/08/2016 19:26	111.538	2.15926	27.6	5437.28	LI820	28.3	30.7	0.9941	5720.78	0.02599	355.011	394.543	387.428	11.9091	4.74865	Rajang
20/08/2016 19:27	111.538	2.15934	27.6	5428.13	LI820	28.33	30.7	0.9941	5704.14	0.02599	355.011	394.543	387.428	11.9091	4.73382	Rajang
20/08/2016 19:28	111.538	2.15942	27.6	5419.23	LI820	28.37	30.7	0.9941	5684.6	0.02599	355.011	394.543	387.428	11.9091	4.7164	Rajang
20/08/2016 19:29	111.538	2.1595	27.6	5419.23	LI820	28.42	30.7	0.9941	5671.2	0.02599	355.011	394.543	387.428	11.9091	4.70446	Rajang
20/08/2016 19:30	111.539	2.15958	27.6	5419.24	LI820	28.52	30.7	0.9941	5647.13	0.02599	355.011	394.543	387.428	11.9091	4.683	Rajang
20/08/2016 19:31	111.539	2.15966	27.6	5413.06	LI820	28.57	30.7	0.9941	5631.35	0.02599	355.011	394.543	387.428	11.9091	4.66893	Rajang
20/08/2016 19:32	111.539	2.15974	27.6	5400.94	LI820	28.61	30.7	0.9941	5608.17	0.02599	355.011	394.543	387.428	11.9091	4.64827	Rajang
20/08/2016 19:33	111.539	2.15982	27.6	5391.79	LI820	28.6	30.7	0.9941	5600.69	0.02599	355.011	394.543	387.428	11.9091	4.6416	Rajang
20/08/2016 19:34	111.539	2.1599	27.6	5379.92	LI820	28.61	30.7	0.9941	5585.78	0.02599	355.011	394.543	387.428	11.9091	4.62831	Rajang
20/08/2016 19:35	111.539	2.15998	27.6	5367.8	LI820	28.62	30.7	0.9941	5571.66	0.02599	355.011	394.543	387.315	11.9108	4.6164	Rajang
20/08/2016 19:36	111.539	2.16006	27.6	5358.65	LI820	28.61	30.7	0.9941	5564.74	0.02599	355.011	394.543	387.315	11.9108	4.61023	Rajang
20/08/2016 19:37	111.539	2.16015	27.6	5349.51	LI820	28.63	30.7	0.9941	5549.51	0.02599	355.011	394.543	387.315	11.9108	4.59665	Rajang
20/08/2016 19:38	111.539	2.16023	27.6	5334.42	LI820	28.64	30.7	0.9941	5531.36	0.02599	355.011	394.543	387.315	11.9108	4.58047	Rajang
20/08/2016 19:39	111.539	2.16031	27.6	5322.3	LI820	28.63	30.7	0.9941	5521.38	0.02599	355.011	394.543	387.315	11.9108	4.57157	Rajang
20/08/2016 19:40	111.539	2.16039	27.7	5310.18	LI820	28.58	30.7	0.9941	5520.14	0.02599	355.011	394.543	387.315	11.9108	4.57046	Rajang
20/08/2016 19:41	111.539	2.16047	27.7	5295.09	LI820	28.6	30.7	0.9941	5498.94	0.026	355.011	394.543	387.315	11.9108	4.55332	Rajang
20/08/2016 19:42	111.539	2.16055	27.7	5282.97	LI820	28.61	30.7	0.9941	5484.77	0.026	355.011	394.543	387.315	11.9108	4.54068	Rajang
20/08/2016 19:43	111.539	2.16063	27.7	5267.89	LI820	28.51	30.7	0.9941	5492.69	0.026	355.011	394.543	387.315	11.9108	4.54774	Rajang
20/08/2016 19:44	111.539	2.16071	27.7	5246.61	LI820	28.53	30.7	0.9941	5466.98	0.026	355.011	394.543	387.315	11.9108	4.52481	Rajang
20/08/2016 19:45	111.539	2.16079	27.7	5246.62	LI820	28.57	30.7	0.9941	5457.35	0.026	355.011	394.543	387.315	11.9108	4.51622	Rajang
20/08/2016 19:46	111.539	2.16087	27.7	5246.62	LI820	28.51	30.7	0.9941	5470.42	0.026	355.011	394.543	387.315	11.9108	4.52788	Rajang
20/08/2016 19:47	111.54	2.16095	27.7	5234.51	LI820	28.53	30.7	0.9941	5453.66	0.026	355.011	394.543	387.315	11.9108	4.51293	Rajang
20/08/2016 19:48	111.54	2.16103	27.7	5222.39	LI820	28.56	30.7	0.9941	5434.62	0.026	355.011	394.543	387.315	11.9108	4.49595	Rajang
20/08/2016 19:49	111.54	2.16111	27.7	5210.27	LI820	28.57	30.7	0.9941	5418.58	0.026	355.011	394.543	387.315	11.9108	4.48164	Rajang
20/08/2016 19:50	111.54	2.16119	27.7	5195.18	LI820	28.57	30.7	0.9941	5403.9	0.026	355.011	394.543	387.315	11.9108	4.46855	Rajang
20/08/2016 19:51	111.54	2.16127	27.7	5183.06	LI820	28.56	30.7	0.9941	5394.01	0.026	355.011	394.543	387.315	11.9108	4.45973	Rajang
20/08/2016 19:52	111.54	2.16136	27.7	5167.97	LI820	28.58	30.7	0.9942	5372.72	0.026	355.011	394.543	387.315	11.9108	4.44071	Rajang
20/08/2016 19:53	111.54	2.16144	27.7	5158.82	LI820	28.52	30.7	0.9942	5377.79	0.026	355.011	394.543	387.315	11.9108	4.44523	Rajang
20/08/2016 19:54	111.54	2.16152	27.7	5149.92	LI820	28.49	30.7	0.9942	5375.62	0.026	355.011	394.543	387.315	11.9108	4.44329	Rajang
20/08/2016 19:55	111.54	2.1616	27.7	5140.77	LI820	28.45	30.7	0.9942	5373.82	0.026	355.011	394.543	387.315	11.9108	4.44169	Rajang
20/08/2016 19:56	111.54	2.16168	27.7	5128.65	LI820	28.43	30.7	0.9942	5366.99	0.026	355.011	394.543	387.315	11.9108	4.4356	Rajang
20/08/2016 19:57	111.54	2.16176	27.7	5116.53	LI820	28.43	30.7	0.9942	5352.9	0.026	355.011	394.543	387.315	11.9108	4.42303	Rajang
20/08/2016 19:58	111.54	2.16184	27.7	5104.41	LI820	28.4	30.7	0.9942	5348.32	0.026	355.011	394.543	387.315	11.9108	4.41894	Rajang
20/08/2016 19:59	111.54	2.16192	27.7	5089.33	LI820	28.38	30.7	0.9942	5335.37	0.026	355.011	394.543	387.315	11.9108	4.40739	Rajang
20/08/2016 20:00	111.54	2.162	27.7	5074.24	LI820	28.42	30.7	0.9942	5311.7	0.026	355.011	394.543	387.202	11.9126	4.38692	Rajang
20/08/2016 20:01	111.54	2.16208	27.7	5059.15	LI820	28.49	30.7	0.9942	5279.43	0.026	355.011	394.543	387.202	11.9126	4.35814	Rajang
20/08/2016 20:02	111.54	2.16216	27.8	5052.97	LI820	28.46	30.7	0.9942	5281.8	0.026	355.011	394.543	387.202	11.9126	4.36025	Rajang
20/08/2016 20:03	111.54	2.16224	27.8	5037.88	LI820	28.44	30.7	0.9942	5270.69	0.02601	355.011	394.543	387.202	11.9126	4.35202	Rajang
20/08/2016 20:04	111.54	2.16232	27.8	5028.73	LI820	28.45	30.7	0.9942	5258.05	0.02601	355.011	394.543	387.202	11.9126	4.34074	Rajang
20/08/2016 20:05	111.541	2.1624	27.8	5013.64	LI820	28.45	30.7	0.9942	5241.79	0.02601	355.011	394.543	387.202	11.9126	4.32623	Rajang
20/08/2016 20:06	111.541	2.16248	27.8	4998.55	LI820	28.43	30.7	0.9942	5229.83	0.02601	355.011	394.543	387.202	11.9126	4.31555	Rajang
20/08/2016 20:07	111.541	2.16257	27.8	4974.31	LI820	28.41	30.7	0.9942	5209.17	0.02601	355.011	394.543	387.202	11.9126	4.29712	Rajang
20/08/2016 20:08	111.541	2.16265	27.8	4959.22	LI820	28.4	30.7	0.9942	5195.64	0.02601	355.011	394.543	387.202	11.9126	4.28504	Rajang
20/08/2016 20:09	111.541	2.16273	27.8	4934.97	LI820	28.42	30.7	0.9942	5165.74	0.02601	355.011	394.543	387.202	11.9126	4.25836	Rajang
20/08/2016 20:10	111.541	2.16281	27.8	4913.7	LI820	28.42	30.7	0.9942	5143.55	0.02601	355.011	394.543	387.202	11.9126	4.23856	Rajang
20/08/2016 20:11	111.541	2.16289	27.8	4889.45	LI820	28.17	30.7	0.9942	5173.27	0.02601	355.011	394.543	387.202	11.9126	4.26508	Rajang
20/08/2016 20:12	111.541	2.16297	27.8	4865.46	LI820	28.07	30.7	0.9942	5170.59	0.02601	355.011	394.543	387.202	11.9126	4.26269	Rajang
20/08/2016 20:13	111.541	2.16305	27.8	4850.12	LI820	28.17	30.7	0.9942	5131.52	0.02601	355.011	394.543	387.202	11.9126	4.22783	Rajang
20/08/2016 20:14	111.541	2.16313	27.8	4832.06	LI820	28.26	30.7	0.9942	5093.71	0.02601	355.011	394.543	387.202	11.9126	4.19409	Rajang
20/08/2016 20:15	111.541	2.16321	27.8	4804.85	LI820	28.27	30.7	0.9942	5063.29	0.02601	355.011	394.543	387.202	11.9126	4.16694	Rajang
20/08/2016 20:16	111.541	2.16329	27.8	4780.6	LI820	28.05	30.7	0.9942	5084.79	0.02601	355.011	394.543	387.202	11.9126	4.18613	Rajang
20/08/2016 20:17	111.541	2.16337	27.8	4756.36	LI820	27.9	30.7	0.9942	5091.37	0.02601	355.011	394.543	387.202	11.9126	4.192	Rajang
20/08/2016 20:18	111.541	2.16345	27.8	4729.14	LI820	28.03	30.7	0.9942	5033.79	0.02601	355.011	394.543	387.202	11.9126	4.14062	Rajang
20/08/2016 20:19	111.541	2.16353	27.8	4711.08	LI820	27.88	30.7	0.9942	5045.82	0.02601	355.011	394.543	387.202	11.9126	4.15135	Rajang
20/08/2016 20:20	111.541	2.16361	27.8	4692.78	LI820	27.7	30.7	0.9942	5064.31	0.02601	355.011	394.543	387.202	11.9126	4.16785	Rajang
20/08/2016 20:21	111.541	2.1637	27.8	4674.72	LI820	27.71	30.7	0.9942	5042.44	0.02601	355.011	394.543	387.202	11.9126	4.14833	Rajang
20/08/2016 20:22	111.541	2.16378	27.8	4656.41	LI820	27.9	30.7	0.9942	4982.28	0.02601	355.011	394.543	387.202	11.9126	4.09465	Rajang
20/08/2016 20:23	111.542	2.16386	27.8	4641.32	LI820	28.03	30.7	0.9942	4941.16	0.02601	355.011	394.543	387.202	11.9126	4.05796	Rajang
20/08/2016 20:24	111.542	2.16394	27.9	4623.26	LI820	28.15	30.7	0.9942	4895.87	0.02601	355.011	394.543	387.202	11.9126	4.01754	Rajang
20/08/2016 20:25	111.542	2.16402	27.9	4608.17	LI820	28.21	30.7	0.9942	4867.6	0.02601	355.011	394.543	387.089	11.9143	3.9929	Rajang
20/08/2016 20:26	111.542	2.1641	27.9	4586.9	LI820	28.28	30.7	0.9942	4831.11	0.02602	355.011	394.543	387.089	11.9143	3.96185	Rajang
20/08/2016 20:27	111.542	2.16418	27.9	4565.62	LI820	28.24	30.7	0.9942	4815.67	0.02602	355.011	394.543	387.089	11.9143	3.94807	Rajang
20/08/2016 20:28	111.542	2.16426	27.9	4508.22	LI820	28.3	30.7	0.9942	4742.59	0.02602	355.011	394.543	387.089	11.9143	3.88282	Rajang
20/08/2016 20:29	111.542	2.16434	27.9	4459.72	LI820	28.3	30.7	0.9942	4692.22	0.02602	355.011	394.543	387.089	11.9143	3.83785	Rajang
20/08/2016 20:30	111.542	2.16442	27.8	4441.66	LI820	28.31	30.7	0.9942	4672.15	0.02602	355.011	394.543	387.089	11.9143	3.81993	Rajang
20/08/2016 20:31	111.542	2.1645	27.8	4426.57	LI820	28.33	30.7	0.9942	4651.27	0.02602	355.011	394.543	387.089	11.9143	3.80129	Rajang
20/08/2016 20:32	111.542	2.16458	27.8	4408.26	LI820	28.19	30.7	0.9942	4661.27	0.02602	355.011	394.543	387.089	11.9143	3.81021	Rajang
20/08/2016 20:33	111.542	2.16466	27.8	4399.11	LI820	27.9	30.7	0.9943	4707.07	0.02602	355.011	394.543	387.089	11.9143	3.85107	Rajang
20/08/2016 20:34	111.542	2.16474	27.8	4375.12	LI820	27.88	30.7	0.9943	4685.17	0.02602	355.011	394.543	387.089	11.9143	3.83152	Rajang
20/08/2016 20:35	111.542	2.16482	27.8	4359.78	LI820	27.89	30.7	0.9943	4667.14	0.02602	355.011	394.543	387.089	11.9143	3.81542	Rajang
20/08/2016 20:36	111.542	2.16491	27.8	4347.66	LI820	27.89	30.7	0.9943	4655.39	0.02602	355.011	394.543	387.089	11.9143	3.80493	Rajang
20/08/2016 20:37	111.542	2.16499	27.8	4332.57	LI820	28.07	30.7	0.9943	4603.49	0.02602	355.011	394.543	387.089	11.9143	3.75859	Rajang
20/08/2016 20:38	111.542	2.16507	27.8	4275.16	LI820	28.14	30.7	0.9943	4528.71	0.02602	355.011	394.543	387.089	11.9143	3.69183	Rajang
20/08/2016 20:39	111.542	2.16515	27.8	4150.94	LI820	28.27	30.7	0.9943	4373.38	0.02602	355.011	394.543	387.089	11.9143	3.55314	Rajang
20/08/2016 20:40	111.543	2.16523	27.8	4032.9	LI820	28.25	30.7	0.9943	4252.94	0.02602	355.011	394.543	387.089	11.9143	3.44561	Rajang
20/08/2016 20:41	111.543	2.16531	27.8	3951.25	LI820	28.21	30.7	0.9943	4173.46	0.02602	355.011	394.543	387.089	11.9143	3.37465	Rajang
20/08/2016 20:42	111.543	2.16539	27.8	3884.44	LI820	28.18	30.7	0.9943	4108.75	0.02602	355.011	394.543	387.089	11.9143	3.31687	Rajang
20/08/2016 20:43	111.543	2.16547	27.8	3884.44	LI820	28.17	30.7	0.9943	4109.65	0.02602	355.011	394.543	387.089	11.9143	3.31768	Rajang
20/08/2016 20:44	111.543	2.16555	27.8	3899.79	LI820	28.04	30.7	0.9943	4147.64	0.02602	355.011	394.543	387.089	11.9143	3.35159	Rajang
20/08/2016 20:45	111.543	2.16563	27.8	3848.32	LI820	28.07	30.7	0.9943	4088.09	0.02602	355.011	394.543	387.089	11.9143	3.29843	Rajang
20/08/2016 20:46	111.543	2.16571	27.8	3763.44	LI820	27.81	30.7	0.9943	4043.15	0.02602	355.011	394.543	387.089	11.9143	3.2583	Rajang
20/08/2016 20:47	111.543	2.16579	27.8	3733.26	LI820	27.63	30.7	0.9943	4040.18	0.02602	355.011	394.543	387.089	11.9143	3.25565	Rajang
20/08/2016 20:48	111.543	2.16587	27.8	3706.04	LI820	27.44	30.7	0.9943	4044.09	0.02602	355.011	394.543	387.089	11.9143	3.25914	Rajang
20/08/2016 20:49	111.543	2.16595	27.8	3672.64	LI820	27.38	30.7	0.9943	4016.75	0.02603	355.011	394.543	387.089	11.9143	3.23598	Rajang
20/08/2016 20:50	111.543	2.16603	27.8	3654.58	LI820	27.35	30.7	0.9943	4003.07	0.02603	355.011	394.543	386.976	11.9161	3.22423	Rajang
20/08/2016 20:51	111.543	2.16612	27.8	3642.46	LI820	27.31	30.7	0.9943	3996.17	0.02603	355.011	394.543	386.976	11.9161	3.21806	Rajang
20/08/2016 20:52	111.543	2.1662	27.8	3651.37	LI820	27.3	30.7	0.9943	4008.36	0.02603	355.011	394.543	386.976	11.9161	3.22895	Rajang
20/08/2016 20:53	111.543	2.16628	27.8	3663.5	LI820	27.12	30.7	0.9943	4051.13	0.02603	355.011	394.543	386.976	11.9161	3.26716	Rajang
20/08/2016 20:54	111.543	2.16636	27.8	3684.79	LI820	27.22	30.7	0.9943	4057.71	0.02603	355.011	394.543	386.976	11.9161	3.27304	Rajang
20/08/2016 20:55	111.543	2.16644	27.8	3702.85	LI820	27.36	30.7	0.9943	4053.11	0.02603	355.011	394.543	386.976	11.9161	3.26893	Rajang
20/08/2016 20:56	111.543	2.16652	27.8	3718.2	LI820	27.46	30.7	0.9943	4054.32	0.02603	355.011	394.543	386.976	11.9161	3.27001	Rajang
20/08/2016 20:57	111.543	2.1666	27.8	3730.08	LI820	27.63	30.7	0.9943	4037.39	0.02603	355.011	394.543	386.976	11.9161	3.25489	Rajang
20/08/2016 20:58	111.544	2.16668	27.8	3681.83	LI820	27.64	30.7	0.9943	3983.72	0.02603	355.011	394.543	386.976	11.9161	3.20694	Rajang
20/08/2016 20:59	111.544	2.16676	27.8	3630.36	LI820	27.34	30.7	0.9943	3977.5	0.02603	355.011	394.543	386.976	11.9161	3.20139	Rajang
20/08/2016 21:00	111.544	2.16684	27.8	3593.99	LI820	27.37	30.7	0.9943	3933.39	0.02603	355.011	394.543	386.976	11.9161	3.16198	Rajang
20/08/2016 21:01	111.544	2.16692	27.8	3557.62	LI820	27.43	30.7	0.9943	3883.09	0.02603	355.011	394.543	386.976	11.9161	3.11705	Rajang
20/08/2016 21:02	111.544	2.167	27.8	3530.4	LI820	27.19	30.7	0.9943	3893.2	0.02603	355.011	394.543	386.976	11.9161	3.12608	Rajang
20/08/2016 21:03	111.544	2.16708	27.8	3512.34	LI820	27.26	30.7	0.9943	3863.39	0.02603	355.011	394.543	386.976	11.9161	3.09945	Rajang
20/08/2016 21:04	111.544	2.16716	27.8	3475.96	LI820	27.02	30.7	0.9943	3861.63	0.02603	355.011	394.543	386.976	11.9161	3.09788	Rajang
20/08/2016 21:05	111.544	2.16724	27.8	3475.97	LI820	26.88	30.7	0.9943	3884.28	0.02603	355.011	394.543	386.976	11.9161	3.11811	Rajang
20/08/2016 21:06	111.544	2.16733	27.8	3494.04	LI820	26.84	30.7	0.9943	3910.46	0.02603	355.011	394.543	386.976	11.9161	3.1415	Rajang
20/08/2016 21:07	111.544	2.16741	27.8	3518.29	LI820	26.94	30.7	0.9943	3920.72	0.02603	355.011	394.543	386.976	11.9161	3.15066	Rajang
20/08/2016 21:08	111.544	2.16749	27.8	3536.36	LI820	27.09	30.7	0.9943	3916.62	0.02603	355.011	394.543	386.976	11.9161	3.147	Rajang
20/08/2016 21:09	111.544	2.16757	27.8	3536.37	LI820	27.47	30.7	0.9943	3854.74	0.02603	355.011	394.543	386.976	11.9161	3.09172	Rajang
20/08/2016 21:10	111.544	2.16765	27.8	3524.49	LI820	27.76	30.7	0.9943	3794.63	0.02603	355.011	394.543	386.976	11.9161	3.03803	Rajang
20/08/2016 21:11	111.544	2.16773	27.8	3445.55	LI820	27.91	30.7	0.9943	3686.31	0.02604	355.011	394.543	386.976	11.9161	2.94239	Rajang
20/08/2016 21:12	111.544	2.16781	27.8	3394.08	LI820	27.98	30.7	0.9943	3619.59	0.02604	355.011	394.543	386.976	11.9161	2.88277	Rajang
20/08/2016 21:13	111.544	2.16789	27.8	3351.77	LI820	27.81	30.7	0.9943	3600.09	0.02604	355.011	394.543	386.976	11.9161	2.86534	Rajang
20/08/2016 21:14	111.544	2.16797	27.8	3312.43	LI820	27.56	30.7	0.9944	3596.01	0.02604	355.011	394.543	386.863	11.9178	2.86208	Rajang
20/08/2016 21:15	111.545	2.16805	27.8	3318.62	LI820	27.41	30.7	0.9944	3625.93	0.02604	355.011	394.543	386.863	11.9178	2.88882	Rajang
20/08/2016 21:16	111.545	2.16813	27.8	3345.84	LI820	27.53	30.7	0.9944	3637.68	0.02604	355.011	394.543	386.863	11.9178	2.89932	Rajang
20/08/2016 21:17	111.545	2.16821	27.8	3370.1	LI820	27.39	30.7	0.9944	3685.38	0.02604	355.011	394.543	386.863	11.9178	2.94196	Rajang
20/08/2016 21:18	111.545	2.16829	27.8	3385.2	LI820	27.2	30.7	0.9944	3731.76	0.02604	355.011	394.543	386.863	11.9178	2.98341	Rajang
20/08/2016 21:19	111.545	2.16837	27.8	3406.24	LI820	27.2	30.7	0.9944	3754.84	0.02604	355.011	394.543	386.863	11.9178	3.00404	Rajang
20/08/2016 21:20	111.545	2.16845	27.8	3424.55	LI820	27.17	30.7	0.9944	3780.92	0.02604	355.011	394.543	386.863	11.9178	3.02735	Rajang
20/08/2016 21:21	111.545	2.16854	27.7	3442.62	LI820	27.07	30.7	0.9944	3815.92	0.02604	355.011	394.543	386.863	11.9178	3.05863	Rajang
20/08/2016 21:22	111.545	2.16862	27.7	3457.72	LI820	26.96	30.7	0.9944	3851.35	0.02604	355.011	394.543	386.863	11.9178	3.0903	Rajang
20/08/2016 21:23	111.545	2.1687	27.7	3466.89	LI820	26.81	30.7	0.9944	3885.8	0.02604	355.011	394.543	386.863	11.9178	3.12109	Rajang
20/08/2016 21:24	111.545	2.16878	27.7	3479.02	LI820	26.74	30.7	0.9944	3911.62	0.02604	355.011	394.543	386.863	11.9178	3.14417	Rajang
20/08/2016 21:25	111.545	2.16886	27.7	3484.96	LI820	26.84	30.7	0.9944	3902.44	0.02604	355.011	394.543	386.863	11.9178	3.13596	Rajang
20/08/2016 21:26	111.545	2.16894	27.7	3491.15	LI820	26.87	30.7	0.9944	3903.4	0.02604	355.011	394.543	386.863	11.9178	3.13682	Rajang
20/08/2016 21:27	111.545	2.16902	27.7	3491.15	LI820	26.92	30.7	0.9944	3894.84	0.02604	355.011	394.543	386.863	11.9178	3.12917	Rajang
20/08/2016 21:28	111.545	2.1691	27.7	3491.16	LI820	26.93	30.7	0.9944	3893.79	0.02604	355.011	394.543	386.863	11.9178	3.12823	Rajang
20/08/2016 21:29	111.545	2.16918	27.7	3500.32	LI820	26.82	30.7	0.9944	3921.08	0.02604	355.011	394.543	386.863	11.9178	3.15262	Rajang
20/08/2016 21:30	111.545	2.16926	27.7	3500.32	LI820	26.97	30.7	0.9944	3897.44	0.02604	355.011	394.543	386.863	11.9178	3.13149	Rajang
20/08/2016 21:31	111.545	2.16934	27.7	3484.98	LI820	27.2	30.7	0.9944	3842.62	0.02604	355.011	394.543	386.863	11.9178	3.08249	Rajang
20/08/2016 21:32	111.545	2.16942	27.7	3484.99	LI820	27.46	30.7	0.9944	3800.95	0.02604	355.011	394.543	386.863	11.9178	3.04525	Rajang
20/08/2016 21:33	111.546	2.1695	27.7	3484.99	LI820	27.61	30.7	0.9944	3777	0.02604	355.011	394.543	386.863	11.9178	3.02384	Rajang
20/08/2016 21:34	111.546	2.16958	27.7	3485	LI820	27.64	30.7	0.9944	3771.92	0.02605	355.011	394.543	386.863	11.9178	3.02046	Rajang
20/08/2016 21:35	111.546	2.16966	27.6	3485	LI820	27.65	30.7	0.9944	3768.69	0.02605	355.011	394.543	386.863	11.9178	3.01758	Rajang
20/08/2016 21:36	111.546	2.16975	27.6	3479.06	LI820	27.39	30.7	0.9944	3804.07	0.02605	355.011	394.543	386.863	11.9178	3.04921	Rajang
20/08/2016 21:37	111.546	2.16983	27.6	3479.07	LI820	27.21	30.7	0.9944	3833.77	0.02605	355.011	394.543	386.863	11.9178	3.07577	Rajang
20/08/2016 21:38	111.546	2.16991	27.6	3479.07	LI820	27.1	30.7	0.9944	3852.17	0.02605	355.011	394.543	386.863	11.9178	3.09222	Rajang
20/08/2016 21:39	111.546	2.16999	27.6	3473.14	LI820	27.22	30.7	0.9944	3826.41	0.02605	355.011	394.543	386.75	11.9195	3.06963	Rajang
20/08/2016 21:40	111.546	2.17007	27.6	3473.14	LI820	27.3	30.7	0.9944	3812.25	0.02605	355.011	394.543	386.75	11.9195	3.05697	Rajang
20/08/2016 21:41	111.546	2.17015	27.6	3473.15	LI820	27.69	30.7	0.9944	3751.1	0.02605	355.011	394.543	386.75	11.9195	3.00229	Rajang
20/08/2016 21:42	111.546	2.17023	27.6	3463.99	LI820	27.89	30.7	0.9944	3709.49	0.02605	355.011	394.543	386.75	11.9195	2.96508	Rajang
20/08/2016 21:43	111.546	2.17031	27.6	3457.81	LI820	27.96	30.7	0.9944	3690.72	0.02605	355.011	394.543	386.75	11.9195	2.94829	Rajang
20/08/2016 21:44	111.546	2.17039	27.6	3451.87	LI820	28.07	30.7	0.9944	3668.16	0.02605	355.011	394.543	386.75	11.9195	2.92812	Rajang
20/08/2016 21:45	111.546	2.17047	27.6	3451.88	LI820	27.97	30.7	0.9944	3683.15	0.02605	355.011	394.543	386.75	11.9195	2.94152	Rajang
20/08/2016 21:46	111.546	2.17055	27.6	3445.7	LI820	27.72	30.7	0.9944	3716.28	0.02605	355.011	394.543	386.75	11.9195	2.97115	Rajang
20/08/2016 21:47	111.546	2.17063	27.6	3445.7	LI820	27.52	30.7	0.9944	3747.29	0.02605	355.011	394.543	386.75	11.9195	2.99888	Rajang
20/08/2016 21:48	111.546	2.17071	27.5	3439.76	LI820	27.59	30.7	0.9944	3730.18	0.02605	355.011	394.543	386.75	11.9195	2.98358	Rajang
20/08/2016 21:49	111.546	2.17079	27.5	3433.58	LI820	27.53	30.7	0.9944	3732.8	0.02605	355.011	394.543	386.75	11.9195	2.98592	Rajang
20/08/2016 21:50	111.546	2.17087	27.5	3427.65	LI820	27.43	30.7	0.9944	3742.76	0.02605	355.011	394.543	386.75	11.9195	2.99483	Rajang
20/08/2016 21:51	111.547	2.17096	27.5	3427.65	LI820	27.5	30.7	0.9944	3731.04	0.02605	355.011	394.543	386.75	11.9195	2.98435	Rajang
20/08/2016 21:52	111.547	2.17104	27.5	3418.5	LI820	27.38	30.7	0.9944	3740.32	0.02605	355.011	394.543	386.75	11.9195	2.99265	Rajang
20/08/2016 21:53	111.547	2.17112	27.5	3412.56	LI820	27.48	30.7	0.9944	3718.72	0.02605	355.011	394.543	386.75	11.9195	2.97333	Rajang
20/08/2016 21:54	111.547	2.1712	27.5	3406.38	LI820	27.73	30.7	0.9944	3671.44	0.02605	355.011	394.543	386.75	11.9195	2.93105	Rajang
20/08/2016 21:55	111.547	2.17128	27.5	3406.38	LI820	27.95	30.7	0.9945	3638.7	0.02605	355.011	394.543	386.75	11.9195	2.90174	Rajang
20/08/2016 21:56	111.547	2.17136	27.5	3397.48	LI820	28.11	30.7	0.9945	3603.71	0.02606	355.011	394.543	386.75	11.9195	2.87155	Rajang
20/08/2016 21:57	111.547	2.17144	27.5	3397.48	LI820	28.21	30.7	0.9945	3588.61	0.02606	355.011	394.543	386.75	11.9195	2.85804	Rajang
20/08/2016 21:58	111.547	2.17152	27.5	3397.48	LI820	28.23	30.7	0.9945	3585.78	0.02606	355.011	394.543	386.75	11.9195	2.85551	Rajang
20/08/2016 21:59	111.547	2.1716	27.5	3391.3	LI820	28.32	30.7	0.9945	3565.81	0.02606	355.011	394.543	386.75	11.9195	2.83764	Rajang
20/08/2016 22:00	111.547	2.17168	27.4	3385.37	LI820	28.38	30.7	0.9945	3551.14	0.02606	355.011	394.543	386.75	11.9195	2.82452	Rajang
20/08/2016 22:01	111.547	2.17176	27.4	3385.37	LI820	28.36	30.7	0.9945	3553.63	0.02606	355.011	394.543	386.75	11.9195	2.82675	Rajang
20/08/2016 22:02	111.547	2.17184	27.4	3376.22	LI820	28.32	30.7	0.9945	3550.59	0.02606	355.011	394.543	386.75	11.9195	2.82403	Rajang
20/08/2016 22:03	111.547	2.17192	27.4	3376.22	LI820	28.28	30.7	0.9945	3555.62	0.02606	355.011	394.543	386.75	11.9195	2.82853	Rajang
20/08/2016 22:04	111.547	2.172	27.3	3367.07	LI820	28.28	30.7	0.9945	3546.54	0.02606	355.011	394.543	386.637	11.9213	2.82082	Rajang
20/08/2016 22:05	111.547	2.17208	27.3	3358.16	LI820	28.24	30.7	0.9945	3543.33	0.02606	355.011	394.543	386.637	11.9213	2.81795	Rajang
20/08/2016 22:06	111.547	2.17217	27.3	3342.82	LI820	28.23	30.7	0.9945	3528.12	0.02606	355.011	394.543	386.637	11.9213	2.80434	Rajang
20/08/2016 22:07	111.547	2.17225	27.3	3336.89	LI820	28.26	30.7	0.9945	3517.73	0.02606	355.011	394.543	386.637	11.9213	2.79504	Rajang
20/08/2016 22:08	111.548	2.17233	27.3	3330.7	LI820	28.22	30.7	0.9945	3516.32	0.02606	355.011	394.543	386.637	11.9213	2.79378	Rajang
20/08/2016 22:09	111.548	2.17241	27.2	3330.71	LI820	28.19	30.7	0.9945	3521.47	0.02606	355.011	394.543	386.637	11.9213	2.79839	Rajang
20/08/2016 22:10	111.548	2.17249	27.2	3330.71	LI820	28.21	30.7	0.9945	3517.87	0.02606	355.011	394.543	386.637	11.9213	2.79517	Rajang
20/08/2016 22:11	111.548	2.17257	27.2	3300.52	LI820	28.24	30.7	0.9945	3482.36	0.02606	355.011	394.543	386.637	11.9213	2.76339	Rajang
20/08/2016 22:12	111.548	2.17265	27.2	3224.79	LI820	28.36	30.7	0.9945	3383.97	0.02606	355.011	394.543	386.637	11.9213	2.67536	Rajang
20/08/2016 22:13	111.548	2.17273	27.2	3146.09	LI820	28.38	30.7	0.9945	3299.03	0.02606	355.011	394.543	386.637	11.9213	2.59936	Rajang
20/08/2016 22:14	111.548	2.17281	27.1	3106.75	LI820	28.35	30.7	0.9945	3262.79	0.02606	355.011	394.543	386.637	11.9213	2.56694	Rajang
20/08/2016 22:15	111.548	2.17289	27.1	3091.65	LI820	28.31	30.7	0.9945	3252.25	0.02606	355.011	394.543	386.637	11.9213	2.55751	Rajang
20/08/2016 22:16	111.548	2.17297	27.1	3070.37	LI820	28.25	30.7	0.9945	3238.24	0.02606	355.011	394.543	386.637	11.9213	2.54497	Rajang
20/08/2016 22:17	111.548	2.17305	27.1	3055.28	LI820	28.22	30.7	0.9945	3225.85	0.02606	355.011	394.543	386.637	11.9213	2.53389	Rajang
20/08/2016 22:18	111.548	2.17313	27	3040.19	LI820	28.19	30.7	0.9945	3214.23	0.02606	355.011	394.543	386.637	11.9213	2.52349	Rajang
20/08/2016 22:19	111.548	2.17321	27	3034	LI820	28.23	30.7	0.9945	3202.47	0.02607	355.011	394.543	386.637	11.9213	2.51393	Rajang
20/08/2016 22:20	111.548	2.17329	27	3046.13	LI820	28.25	30.7	0.9945	3212.87	0.02607	355.011	394.543	386.637	11.9213	2.52324	Rajang
20/08/2016 22:21	111.548	2.17338	27	3064.45	LI820	28.2	30.7	0.9945	3238.75	0.02607	355.011	394.543	386.637	11.9213	2.54641	Rajang
20/08/2016 22:22	111.548	2.17346	27	3073.61	LI820	28.2	30.7	0.9945	3247.73	0.02607	355.011	394.543	386.637	11.9213	2.55444	Rajang
20/08/2016 22:23	111.548	2.17354	26.9	3085.5	LI820	28.24	30.7	0.9945	3255.63	0.02607	355.011	394.543	386.637	11.9213	2.56152	Rajang
20/08/2016 22:24	111.548	2.17362	26.9	3100.84	LI820	28.24	30.7	0.9945	3271.72	0.02607	355.011	394.543	386.637	11.9213	2.57592	Rajang
20/08/2016 22:25	111.548	2.1737	26.9	3106.79	LI820	28.28	30.7	0.9945	3271.41	0.02607	355.011	394.543	386.637	11.9213	2.57564	Rajang
20/08/2016 22:26	111.549	2.17378	26.9	3112.98	LI820	28.24	30.7	0.9945	3283.92	0.02607	355.011	394.543	386.637	11.9213	2.58684	Rajang
20/08/2016 22:27	111.549	2.17386	26.8	3118.92	LI820	28.22	30.7	0.9945	3292.96	0.02607	355.011	394.543	386.637	11.9213	2.59493	Rajang
20/08/2016 22:28	111.549	2.17394	26.8	3124.87	LI820	28.09	30.7	0.9945	3318.53	0.02607	355.011	394.543	386.637	11.9213	2.61782	Rajang
20/08/2016 22:29	111.549	2.17402	26.8	3131.06	LI820	28.2	30.7	0.9945	3308.8	0.02607	355.011	394.543	386.524	11.923	2.60949	Rajang
20/08/2016 22:30	111.549	2.1741	26.8	3131.06	LI820	28.28	30.7	0.9945	3297.32	0.02607	355.011	394.543	386.524	11.923	2.59921	Rajang
20/08/2016 22:31	111.549	2.17418	26.8	3137	LI820	28.29	30.7	0.9945	3303.39	0.02607	355.011	394.543	386.524	11.923	2.60464	Rajang
20/08/2016 22:32	111.549	2.17426	26.7	3137.01	LI820	28.27	30.7	0.9945	3305.56	0.02607	355.011	394.543	386.524	11.923	2.60659	Rajang
20/08/2016 22:33	111.549	2.17434	26.7	3137.01	LI820	28.27	30.7	0.9945	3305.44	0.02607	355.011	394.543	386.524	11.923	2.60648	Rajang
20/08/2016 22:34	111.549	2.17442	26.7	3137.02	LI820	28.22	30.7	0.9945	3312.31	0.02607	355.011	394.543	386.524	11.923	2.61263	Rajang
20/08/2016 22:35	111.549	2.17451	26.7	3137.02	LI820	28.24	30.7	0.9946	3310.23	0.02607	355.011	394.543	386.524	11.923	2.61073	Rajang
20/08/2016 22:36	111.549	2.17459	26.6	3131.08	LI820	28.19	30.7	0.9946	3314.88	0.02607	355.011	394.543	386.524	11.923	2.61489	Rajang
20/08/2016 22:37	111.549	2.17467	26.6	3118.96	LI820	28.13	30.7	0.9946	3312.99	0.02607	355.011	394.543	386.524	11.923	2.6132	Rajang
20/08/2016 22:38	111.549	2.17475	26.6	3109.81	LI820	28.06	30.7	0.9946	3313.8	0.02607	355.011	394.543	386.524	11.923	2.61393	Rajang
20/08/2016 22:39	111.549	2.17483	26.6	3103.87	LI820	27.97	30.7	0.9946	3320.93	0.02607	355.011	394.543	386.524	11.923	2.62031	Rajang
20/08/2016 22:40	111.549	2.17491	26.6	3094.72	LI820	27.89	30.7	0.9946	3322.83	0.02607	355.011	394.543	386.524	11.923	2.62201	Rajang
20/08/2016 22:41	111.549	2.17499	26.5	3088.78	LI820	27.8	30.7	0.9946	3328.65	0.02607	355.011	394.543	386.524	11.923	2.62722	Rajang
20/08/2016 22:42	111.549	2.17507	26.5	3088.78	LI820	27.82	30.7	0.9946	3326.69	0.02608	355.011	394.543	386.524	11.923	2.62647	Rajang
20/08/2016 22:43	111.55	2.17515	26.5	3082.6	LI820	27.77	30.7	0.9946	3326.81	0.02608	355.011	394.543	386.524	11.923	2.62658	Rajang
20/08/2016 22:44	111.55	2.17523	26.5	3076.66	LI820	27.71	30.7	0.9946	3329.63	0.02608	355.011	394.543	386.524	11.923	2.62911	Rajang
20/08/2016 22:45	111.55	2.17531	26.5	3076.67	LI820	27.73	30.7	0.9946	3326.96	0.02608	355.011	394.543	386.524	11.923	2.62672	Rajang
20/08/2016 22:46	111.55	2.17539	26.4	3076.67	LI820	27.58	30.7	0.9946	3348.92	0.02608	355.011	394.543	386.524	11.923	2.64638	Rajang
20/08/2016 22:47	111.55	2.17547	26.4	3070.49	LI820	27.42	30.7	0.9946	3364.64	0.02608	355.011	394.543	386.524	11.923	2.66046	Rajang
20/08/2016 22:48	111.55	2.17555	26.4	3070.49	LI820	27.37	30.7	0.9946	3371.33	0.02608	355.011	394.543	386.524	11.923	2.66645	Rajang
20/08/2016 22:49	111.55	2.17563	26.4	3061.58	LI820	27.23	30.7	0.9946	3382.92	0.02608	355.011	394.543	386.524	11.923	2.67683	Rajang
20/08/2016 22:50	111.55	2.17572	26.3	3061.59	LI820	27.05	30.7	0.9946	3408.57	0.02608	355.011	394.543	386.524	11.923	2.6998	Rajang
20/08/2016 22:51	111.55	2.1758	26.3	3061.59	LI820	26.98	30.7	0.9946	3418.48	0.02608	355.011	394.543	386.524	11.923	2.70868	Rajang
20/08/2016 22:52	111.55	2.17588	26.3	3061.59	LI820	26.91	30.7	0.9946	3429.31	0.02608	355.011	394.543	386.524	11.923	2.71837	Rajang
20/08/2016 22:53	111.55	2.17596	26.3	3052.44	LI820	26.84	30.7	0.9946	3429.69	0.02608	355.011	394.543	386.411	11.9248	2.71911	Rajang
20/08/2016 22:54	111.55	2.17604	26.3	3052.44	LI820	26.75	30.7	0.9946	3442.11	0.02608	355.011	394.543	386.411	11.9248	2.73024	Rajang
20/08/2016 22:55	111.55	2.17612	26.2	3052.45	LI820	26.73	30.7	0.9946	3445.11	0.02608	355.011	394.543	386.411	11.9248	2.73292	Rajang
20/08/2016 22:56	111.55	2.1762	26.2	3046.26	LI820	26.76	30.7	0.9946	3433.89	0.02608	355.011	394.543	386.411	11.9248	2.72287	Rajang
20/08/2016 22:57	111.55	2.17628	26.2	3046.27	LI820	26.85	30.7	0.9946	3421.29	0.02608	355.011	394.543	386.411	11.9248	2.71159	Rajang
20/08/2016 22:58	111.55	2.17636	26.2	3040.33	LI820	26.9	30.7	0.9946	3407.3	0.02608	355.011	394.543	386.411	11.9248	2.69906	Rajang
20/08/2016 22:59	111.55	2.17644	26.2	3052.46	LI820	26.93	30.7	0.9946	3418.28	0.02608	355.011	394.543	386.411	11.9248	2.70889	Rajang
20/08/2016 23:00	111.55	2.17652	26.1	3040.34	LI820	26.93	30.7	0.9946	3399.24	0.02608	355.011	394.543	386.411	11.9248	2.69184	Rajang
20/08/2016 23:01	111.551	2.1766	26.1	3046.28	LI820	26.89	30.7	0.9946	3410.42	0.02608	355.011	394.543	386.411	11.9248	2.70185	Rajang
20/08/2016 23:02	111.551	2.17668	26.1	3058.41	LI820	26.87	30.7	0.9946	3425	0.02608	355.011	394.543	386.411	11.9248	2.71491	Rajang
20/08/2016 23:03	111.551	2.17676	26.1	3067.57	LI820	26.85	30.7	0.9946	3436.35	0.02608	355.011	394.543	386.411	11.9248	2.72508	Rajang
20/08/2016 23:04	111.551	2.17684	26.1	2952.49	LI820	26.75	30.7	0.9946	3321.54	0.02609	355.011	394.543	386.411	11.9248	2.62325	Rajang
20/08/2016 23:05	111.551	2.17693	26	2898.04	LI820	26.7	30.7	0.9946	3265.73	0.02609	355.011	394.543	386.411	11.9248	2.57324	Rajang
20/08/2016 23:06	111.551	2.17701	26	2919.33	LI820	26.65	30.7	0.9946	3296.08	0.02609	355.011	394.543	386.411	11.9248	2.60044	Rajang
20/08/2016 23:07	111.551	2.17709	26	2952.5	LI820	26.67	30.7	0.9946	3331.91	0.02609	355.011	394.543	386.411	11.9248	2.63254	Rajang
20/08/2016 23:08	111.551	2.17717	26	2982.7	LI820	26.69	30.7	0.9946	3362.58	0.02609	355.011	394.543	386.411	11.9248	2.66002	Rajang
20/08/2016 23:25	111.552	2.17854	25.7	3204.03	LI820	26.84	30.7	0.9947	3587.86	0.02609	355.011	394.543	386.298	11.9265	2.86226	Rajang
20/08/2016 23:26	111.552	2.17862	25.6	3228.04	LI820	26.92	30.7	0.9947	3602.73	0.02609	355.011	394.543	386.298	11.9265	2.87559	Rajang
20/08/2016 23:27	111.552	2.1787	25.6	3252.3	LI820	26.78	30.7	0.9947	3651.73	0.0261	355.011	394.543	386.298	11.9265	2.92062	Rajang
20/08/2016 23:28	111.552	2.17878	25.6	3273.59	LI820	26.78	30.7	0.9947	3675.29	0.0261	355.011	394.543	386.298	11.9265	2.94174	Rajang
20/08/2016 23:29	111.552	2.17886	25.6	3291.67	LI820	26.75	30.7	0.9947	3700.13	0.0261	355.011	394.543	386.298	11.9265	2.96401	Rajang
20/08/2016 23:30	111.552	2.17894	25.6	3312.96	LI820	26.84	30.7	0.9947	3710.11	0.0261	355.011	394.543	386.298	11.9265	2.97295	Rajang
20/08/2016 23:31	111.552	2.17902	25.5	3328.06	LI820	26.85	30.7	0.9947	3725.73	0.02611	355.011	394.543	386.185	11.9283	2.98854	Rajang
20/08/2016 23:32	111.552	2.1791	25.5	3346.38	LI820	26.73	30.7	0.9947	3765.15	0.02613	355.011	394.543	385.959	11.9317	3.0271	Rajang
20/08/2016 23:33	111.552	2.17918	25.5	3361.48	LI820	26.65	30.7	0.9947	3795.62	0.02614	355.011	394.543	385.846	11.9335	3.05607	Rajang
20/08/2016 23:34	111.552	2.17926	25.5	3373.61	LI820	26.67	30.7	0.9947	3804.85	0.02616	355.011	394.543	385.62	11.937	3.06761	Rajang
20/08/2016 23:35	111.552	2.17935	25.5	3373.62	LI820	26.9	30.7	0.9947	3768.77	0.02617	355.011	394.543	385.507	11.9387	3.03677	Rajang
20/08/2016 23:36	111.553	2.17943	25.4	3358.52	LI820	27	30.7	0.9947	3735.67	0.02619	355.011	394.543	385.394	11.9405	3.00972	Rajang
20/08/2016 23:37	111.553	2.17951	25.4	3255.56	LI820	26.93	30.7	0.9947	3631.83	0.0262	355.011	394.543	385.169	11.944	2.91817	Rajang
20/08/2016 23:38	111.553	2.17959	25.4	3210.02	LI820	26.84	30.7	0.9947	3594.28	0.02622	355.011	394.543	385.056	11.9457	2.88695	Rajang
20/08/2016 23:39	111.553	2.17967	25.4	3200.87	LI820	26.96	30.7	0.9947	3566.83	0.02623	355.011	394.543	384.943	11.9475	2.8637	Rajang
20/08/2016 23:40	111.553	2.17975	25.4	3113.25	LI820	26.95	30.7	0.9947	3470.87	0.02625	355.011	394.543	384.717	11.951	2.78003	Rajang
20/08/2016 23:41	111.553	2.17983	25.3	3122.16	LI820	27.04	30.7	0.9947	3467.08	0.02626	355.011	394.543	384.604	11.9527	2.77807	Rajang
20/08/2016 23:42	111.553	2.17991	25.3	3110.04	LI820	27.08	30.7	0.9947	3447.67	0.02628	355.011	394.543	384.378	11.9563	2.76344	Rajang
20/08/2016 23:43	111.553	2.17999	25.3	3067.72	LI820	27.16	30.7	0.9947	3389.84	0.02629	355.011	394.543	384.265	11.958	2.71253	Rajang
21/08/2016 01:40	111.632	2.17001	21.9	4424.97	LI820	29.1	30.7	0.995	4503.29	0.02814	355.011	394.543	366.08	12.2514	4.08007	Rajang
21/08/2016 01:41	111.634	2.17159	21.5	4403.93	LI820	29.26	30.7	0.995	4451.41	0.02815	355.011	394.543	365.854	12.2552	4.03123	Rajang
21/08/2016 01:42	111.635	2.17341	21.1	4455.42	LI820	29.35	30.7	0.995	4486.91	0.02817	355.011	394.543	365.741	12.2571	4.07002	Rajang
21/08/2016 01:43	111.635	2.17562	20.7	4446.27	LI820	29.29	30.7	0.995	4489.25	0.02819	355.011	394.543	365.629	12.259	4.07587	Rajang
21/08/2016 01:44	111.635	2.17796	20.3	4452.22	LI820	29.35	30.7	0.995	4485.06	0.0282	355.011	394.543	365.403	12.2628	4.0744	Rajang
21/08/2016 01:45	111.635	2.18024	19.9	4506.93	LI820	29.35	30.7	0.995	4539.33	0.02822	355.011	394.543	365.29	12.2647	4.13202	Rajang
21/08/2016 01:46	111.635	2.1826	19.5	4434.16	LI820	29.35	30.7	0.995	4465.91	0.02824	355.011	394.543	365.064	12.2685	4.06297	Rajang
21/08/2016 01:47	111.635	2.18495	19.1	4515.85	LI820	29.46	30.7	0.995	4527.06	0.02825	355.011	394.543	364.951	12.2704	4.12608	Rajang
21/08/2016 01:48	111.635	2.18735	18.7	4582.7	LI820	29.56	30.7	0.995	4574.65	0.02827	355.011	394.543	364.838	12.2723	4.17719	Rajang
21/08/2016 01:49	111.635	2.18983	18.2	4609.93	LI820	29.68	30.7	0.995	4578.18	0.02828	355.011	394.543	364.612	12.2761	4.1835	Rajang
21/08/2016 01:50	111.635	2.19223	17.8	4603.75	LI820	29.63	30.7	0.995	4582.55	0.0283	355.011	394.543	364.499	12.278	4.19148	Rajang
21/08/2016 01:51	111.636	2.19443	17.3	4640.15	LI820	29.56	30.7	0.995	4633.08	0.02832	355.011	394.543	364.273	12.2818	4.24636	Rajang
21/08/2016 01:52	111.637	2.19649	16.9	4612.92	LI820	29.55	30.7	0.995	4607.69	0.02833	355.011	394.543	364.16	12.2837	4.22307	Rajang
21/08/2016 01:53	111.638	2.19857	16.5	4594.61	LI820	29.56	30.7	0.995	4586.5	0.02835	355.011	394.543	364.047	12.2856	4.20545	Rajang
21/08/2016 01:54	111.638	2.20077	16.1	4691.65	LI820	29.68	30.7	0.995	4660.27	0.02837	355.011	394.543	363.821	12.2894	4.28379	Rajang
21/08/2016 01:55	111.638	2.20308	15.6	4646.11	LI820	29.75	30.7	0.995	4602.09	0.02838	355.011	394.543	363.708	12.2913	4.22752	Rajang
21/08/2016 01:56	111.638	2.20535	15	4755.29	LI820	29.76	30.7	0.995	4708.71	0.0284	355.011	394.543	363.595	12.2932	4.33836	Rajang
21/08/2016 01:57	111.637	2.20764	14.4	4697.61	LI820	29.71	30.7	0.995	4659.36	0.02842	355.011	394.543	363.37	12.297	4.2931	Rajang
21/08/2016 01:58	111.636	2.21002	13.8	4791.69	LI820	29.71	30.7	0.995	4752.53	0.02843	355.011	394.543	363.257	12.2989	4.3891	Rajang
21/08/2016 01:59	111.636	2.21244	13.2	4685.74	LI820	29.73	30.7	0.9951	4644.68	0.02845	355.011	394.543	363.031	12.3028	4.28479	Rajang
21/08/2016 02:00	111.636	2.21487	12.5	4658.27	LI820	29.85	30.7	0.9951	4594.05	0.02847	355.011	394.543	362.918	12.3047	4.23739	Rajang
21/08/2016 02:01	111.638	2.21665	12	4740.21	LI820	29.89	30.7	0.9951	4666.65	0.02848	355.011	394.543	362.805	12.3066	4.31282	Rajang
21/08/2016 02:02	111.64	2.21774	11.7	4606.79	LI820	29.94	30.7	0.9951	4526.02	0.0285	355.011	394.543	362.579	12.3104	4.1751	Rajang
21/08/2016 02:03	111.642	2.21873	11.3	4721.91	LI820	30.01	30.7	0.9951	4626.16	0.02851	355.011	394.543	362.466	12.3124	4.27845	Rajang
21/08/2016 02:04	111.644	2.2199	11	4655.32	LI820	30.06	30.7	0.9951	4551.88	0.02853	355.011	394.543	362.353	12.3143	4.20696	Rajang
21/08/2016 02:05	111.646	2.22157	10.5	4718.95	LI820	30.06	30.7	0.9951	4613.25	0.02855	355.011	394.543	362.127	12.3181	4.27338	Rajang
21/08/2016 02:06	111.648	2.22371	9.9	4646.17	LI820	30.03	30.7	0.9951	4548.93	0.02856	355.011	394.543	362.014	12.32	4.21037	Rajang
21/08/2016 02:07	111.649	2.22598	9.3	4794.71	LI820	30	30.7	0.9951	4699.56	0.02858	355.011	394.543	361.788	12.3239	4.36743	Rajang
21/08/2016 02:08	111.649	2.22824	8.6	4603.85	LI820	30.14	30.7	0.9951	4485.12	0.0286	355.011	394.543	361.675	12.3258	4.15346	Rajang
21/08/2016 02:09	111.65	2.23059	8	4682.58	LI820	30.3	30.7	0.9951	4530.69	0.02861	355.011	394.543	361.562	12.3277	4.20185	Rajang
21/08/2016 02:10	111.651	2.23297	7.4	4709.81	LI820	30.33	30.7	0.9951	4552.5	0.02863	355.011	394.543	361.336	12.3316	4.22827	Rajang
21/08/2016 02:11	111.651	2.23542	6.7	4625.15	LI820	30.4	30.7	0.9951	4456.3	0.02865	355.011	394.543	361.224	12.3335	4.13399	Rajang
21/08/2016 02:12	111.651	2.23778	6.1	4691.75	LI820	30.49	30.7	0.9951	4504.34	0.02866	355.011	394.543	361.111	12.3354	4.18499	Rajang
21/08/2016 02:13	111.651	2.24023	5.4	4734.09	LI820	30.57	30.7	0.9951	4529.83	0.02868	355.011	394.543	360.885	12.3393	4.2152	Rajang
21/08/2016 02:14	111.652	2.2419	5	4688.79	LI820	30.55	30.7	0.9951	4488.2	0.0287	355.011	394.543	360.772	12.3412	4.17634	Rajang
21/08/2016 02:15	111.652	2.24237	4.9	4767.52	LI820	30.48	30.7	0.9951	4579.38	0.02871	355.011	394.543	360.546	12.3451	4.27217	Rajang
21/08/2016 02:16	111.652	2.24243	4.8	4664.54	LI820	30.59	30.7	0.9951	4458.33	0.02873	355.011	394.543	360.433	12.347	4.15215	Rajang
21/08/2016 02:17	111.652	2.24253	4.8	4831.16	LI820	30.7	30.7	0.9951	4596.12	0.02873	355.011	394.543	360.433	12.347	4.29292	Rajang
21/08/2016 02:18	111.652	2.24252	4.8	4831.16	LI820	30.62	30.7	0.9951	4612.88	0.02873	355.011	394.543	360.433	12.347	4.31004	Rajang
21/08/2016 02:19	111.652	2.24249	4.8	4755.42	LI820	30.85	30.7	0.9951	4495.45	0.02873	355.011	394.543	360.433	12.347	4.19007	Rajang
21/08/2016 02:20	111.652	2.2425	4.8	4931.19	LI820	31.02	30.7	0.9951	4627.43	0.02873	355.011	394.543	360.433	12.347	4.32491	Rajang
21/08/2016 02:21	111.652	2.24253	4.8	5115.88	LI820	31.08	30.7	0.9951	4790.35	0.02873	355.011	394.543	360.433	12.347	4.49135	Rajang
21/08/2016 02:22	111.652	2.24252	4.8	5285.46	LI820	31.12	30.7	0.9951	4939.63	0.02873	355.011	394.543	360.433	12.347	4.64386	Rajang
21/08/2016 02:23	111.652	2.24252	4.8	5427.82	LI820	30.96	30.7	0.9951	5107.15	0.02874	355.011	394.543	360.433	12.347	4.81668	Rajang
21/08/2016 02:24	111.652	2.24255	4.8	5537	LI820	30.92	30.7	0.9951	5220.61	0.02874	355.011	394.543	360.433	12.347	4.93263	Rajang
21/08/2016 02:25	111.652	2.24252	4.8	5639.99	LI820	31.2	30.7	0.9951	5254.65	0.02874	355.011	394.543	360.32	12.349	4.9682	Rajang
21/08/2016 02:26	111.652	2.24247	4.8	5703.38	LI820	31.32	30.7	0.9951	5288.32	0.02874	355.011	394.543	360.32	12.349	5.00261	Rajang
21/08/2016 02:27	111.652	2.24249	4.8	5788.3	LI820	31.29	30.7	0.9951	5372.2	0.02874	355.011	394.543	360.32	12.349	5.08835	Rajang
21/08/2016 02:28	111.652	2.24248	4.8	5661.06	LI820	31.12	30.7	0.9951	5290.48	0.02874	355.011	394.543	360.32	12.349	5.00482	Rajang
21/08/2016 02:29	111.652	2.24248	4.8	5688.3	LI820	31.17	30.7	0.9951	5303.58	0.02874	355.011	394.543	360.32	12.349	5.01821	Rajang
21/08/2016 02:30	111.652	2.24251	4.8	5748.96	LI820	31.29	30.7	0.9951	5334.15	0.02874	355.011	394.543	360.32	12.349	5.04946	Rajang
21/08/2016 02:31	111.652	2.24249	4.8	5848.98	LI820	31.28	30.7	0.9951	5429.41	0.02874	355.011	394.543	360.32	12.349	5.14682	Rajang
21/08/2016 02:32	111.652	2.24253	4.8	5942.81	LI820	31.26	30.7	0.9951	5521.38	0.02874	355.011	394.543	360.32	12.349	5.24083	Rajang
21/08/2016 02:33	111.652	2.24246	4.8	6024.52	LI820	31.33	30.7	0.9951	5580.34	0.02874	355.011	394.543	360.32	12.349	5.3011	Rajang
21/08/2016 02:34	111.652	2.24249	4.8	6060.92	LI820	31.31	30.7	0.9951	5620.74	0.02874	355.011	394.543	360.32	12.349	5.34239	Rajang
21/08/2016 02:35	111.652	2.2425	4.8	6121.58	LI820	31.25	30.7	0.9951	5691.29	0.02874	355.011	394.543	360.32	12.349	5.4145	Rajang
21/08/2016 02:36	111.652	2.24251	4.8	6127.53	LI820	31.17	30.7	0.9951	5715.25	0.02874	355.011	394.543	360.32	12.349	5.43899	Rajang
21/08/2016 02:37	111.652	2.24248	4.8	5864.12	LI820	31.15	30.7	0.9951	5475.35	0.02874	355.011	394.543	360.32	12.349	5.19378	Rajang
21/08/2016 02:38	111.652	2.2425	4.8	5939.89	LI820	31.07	30.7	0.9951	5563.99	0.02875	355.011	394.543	360.32	12.349	5.28622	Rajang
21/08/2016 02:39	111.652	2.24245	4.8	6000.3	LI820	31.04	30.7	0.9951	5629.1	0.02875	355.011	394.543	360.32	12.349	5.3528	Rajang
21/08/2016 02:40	111.652	2.2425	4.8	5761.15	LI820	31.1	30.7	0.9952	5387.35	0.02875	355.011	394.543	360.32	12.349	5.10557	Rajang
21/08/2016 02:41	111.652	2.24233	4.9	5706.7	LI820	31.19	30.7	0.9952	5315.37	0.02875	355.011	394.543	360.32	12.349	5.03197	Rajang
21/08/2016 02:42	111.652	2.24228	4.9	5776.27	LI820	31.28	30.7	0.9952	5361.25	0.02875	355.011	394.543	360.32	12.349	5.07888	Rajang
21/08/2016 02:43	111.652	2.24218	4.9	5852.03	LI820	31.28	30.7	0.9952	5433.9	0.02875	355.011	394.543	360.207	12.3509	5.15397	Rajang
21/08/2016 02:44	111.652	2.24343	4.8	5909.48	LI820	31.29	30.7	0.9952	5486.64	0.02875	355.011	394.543	360.207	12.3509	5.20791	Rajang
21/08/2016 02:45	111.652	2.24531	4.7	5685.43	LI820	31.51	30.7	0.9952	5231.33	0.02875	355.011	394.543	360.207	12.3509	4.94681	Rajang
21/08/2016 02:46	111.654	2.24725	4.7	5628	LI820	31.46	30.7	0.9952	5187.66	0.02875	355.011	394.543	360.207	12.3509	4.90216	Rajang
21/08/2016 02:47	111.655	2.24896	4.6	5688.42	LI820	31.46	30.7	0.9952	5242.52	0.02875	355.011	394.543	360.207	12.3509	4.95826	Rajang
21/08/2016 02:48	111.657	2.2504	4.6	5455.21	LI820	31.35	30.7	0.9952	5049.56	0.02875	355.011	394.543	360.207	12.3509	4.76093	Rajang
21/08/2016 02:49	111.659	2.25154	4.6	5427.99	LI820	31.33	30.7	0.9952	5027.95	0.02875	355.011	394.543	360.207	12.3509	4.73883	Rajang
21/08/2016 02:50	111.661	2.25244	4.6	5394.57	LI820	31.35	30.7	0.9952	4993.89	0.02875	355.011	394.543	360.207	12.3509	4.704	Rajang
21/08/2016 02:51	111.663	2.25339	4.5	5361.4	LI820	31.31	30.7	0.9952	4973.92	0.02875	355.011	394.543	360.207	12.3509	4.68357	Rajang
21/08/2016 02:52	111.665	2.25406	4.4	5476.53	LI820	31.25	30.7	0.9952	5092.73	0.02876	355.011	394.543	360.207	12.3509	4.80675	Rajang
21/08/2016 02:53	111.667	2.25434	4.3	5361.41	LI820	31.27	30.7	0.9952	4979.1	0.02876	355.011	394.543	360.207	12.3509	4.6905	Rajang
21/08/2016 02:54	111.669	2.25418	4.2	5319.09	LI820	31.29	30.7	0.9952	4934.11	0.02876	355.011	394.543	360.207	12.3509	4.64448	Rajang
21/08/2016 02:55	111.671	2.2541	4.1	5428.02	LI820	31.33	30.7	0.9952	5026.68	0.02876	355.011	394.543	360.207	12.3509	4.73918	Rajang
21/08/2016 02:56	111.674	2.25453	4	5540.18	LI820	31.34	30.7	0.9952	5126.93	0.02876	355.011	394.543	360.207	12.3509	4.84173	Rajang
21/08/2016 02:57	111.676	2.2558	4	5634.02	LI820	31.3	30.7	0.9952	5222.17	0.02876	355.011	394.543	360.207	12.3509	4.93916	Rajang
21/08/2016 02:58	111.676	2.25807	4	5703.59	LI820	31.34	30.7	0.9952	5278.57	0.02876	355.011	394.543	360.207	12.3509	4.99686	Rajang
21/08/2016 02:59	111.676	2.26045	4.1	5773.42	LI820	31.31	30.7	0.9952	5351.4	0.02876	355.011	394.543	360.207	12.3509	5.07137	Rajang
21/08/2016 03:00	111.675	2.26284	4.1	5821.95	LI820	31.28	30.7	0.9952	5403.2	0.02876	355.011	394.543	360.207	12.3509	5.12436	Rajang
21/08/2016 03:01	111.674	2.26516	4.2	5879.39	LI820	31.32	30.7	0.9952	5447.01	0.02876	355.011	394.543	360.094	12.3528	5.16999	Rajang
21/08/2016 03:02	111.673	2.26749	4.2	5918.76	LI820	31.35	30.7	0.9952	5476.83	0.02876	355.011	394.543	360.094	12.3528	5.2005	Rajang
21/08/2016 03:03	111.673	2.26983	4.2	5952.19	LI820	31.32	30.7	0.9952	5514.3	0.02876	355.011	394.543	360.094	12.3528	5.23884	Rajang
21/08/2016 03:04	111.672	2.27215	4.1	5994.53	LI820	31.22	30.7	0.9952	5577.75	0.02876	355.011	394.543	360.094	12.3528	5.30376	Rajang
21/08/2016 03:05	111.672	2.27448	4	6021.77	LI820	31.22	30.7	0.9952	5602.11	0.02876	355.011	394.543	360.094	12.3528	5.32868	Rajang
21/08/2016 03:06	111.672	2.27684	4	6030.94	LI820	31.35	30.7	0.9952	5581.57	0.02876	355.011	394.543	360.094	12.3528	5.30767	Rajang
21/08/2016 03:07	111.672	2.27916	3.9	6051.99	LI820	31.41	30.68	0.9952	5581.84	0.02878	355.356	394.93	360.444	12.3468	5.30906	Rajang
21/08/2016 03:08	111.672	2.28147	3.9	5976.49	LI820	31.62	30.64	0.9952	5456.43	0.02881	356.046	395.704	361.145	12.3349	5.18108	Rajang
21/08/2016 03:09	111.672	2.28366	3.8	5782.64	LI820	31.6	30.6	0.9952	5273.64	0.02884	356.737	396.48	361.847	12.3229	4.99435	Rajang
21/08/2016 03:10	111.673	2.28556	3.7	5822.01	LI820	31.64	30.56	0.9952	5291.63	0.02887	357.43	397.257	362.55	12.3109	5.01311	Main stem
21/08/2016 03:11	111.674	2.28717	3.7	5852.23	LI820	31.68	30.52	0.9952	5301.74	0.0289	358.124	398.036	363.255	12.299	5.02379	Main stem
21/08/2016 03:12	111.676	2.28864	3.7	5843.07	LI820	31.71	30.49	0.9952	5281.35	0.02892	358.646	398.621	363.785	12.29	5.00273	Main stem
21/08/2016 03:13	111.677	2.28987	3.6	5719.04	LI820	31.85	30.47	0.9952	5135.13	0.02893	358.994	399.011	364.139	12.284	4.85238	Main stem
21/08/2016 03:14	111.679	2.29077	3.6	5624.97	LI820	31.97	30.45	0.9952	5023.49	0.02895	359.342	399.403	364.493	12.2781	4.73909	Main stem
21/08/2016 03:15	111.681	2.29113	3.6	5222.17	LI820	32.06	30.43	0.9952	4642.64	0.02896	359.691	399.794	364.847	12.2721	4.3486	Main stem
21/08/2016 03:16	111.683	2.29144	3.6	5164.74	LI820	31.98	30.41	0.9952	4604.74	0.02898	360.041	400.186	365.202	12.2661	4.31069	Main stem
21/08/2016 03:17	111.685	2.29161	3.6	5137.51	LI820	31.95	30.38	0.9952	4580.11	0.029	360.565	400.774	365.735	12.2572	4.28531	Main stem
21/08/2016 03:18	111.687	2.2917	3.7	4834.48	LI820	31.91	30.34	0.9952	4308.8	0.02903	361.266	401.56	366.332	12.2472	4.00844	Main stem
21/08/2016 03:19	111.688	2.29179	3.7	4804.28	LI820	32.03	30.3	0.9952	4252.93	0.02906	361.969	402.348	367.045	12.2353	3.95147	Main stem
21/08/2016 03:20	111.69	2.29177	3.7	4792.15	LI820	32.19	30.26	0.9952	4205.7	0.02909	362.673	403.137	367.76	12.2234	3.90334	Main stem
21/08/2016 03:21	111.692	2.29163	3.7	4504.22	LI820	32.26	30.22	0.9952	3935.54	0.02912	363.378	403.928	368.476	12.2115	3.62689	Main stem
21/08/2016 03:22	111.695	2.29153	3.7	4489.13	LI820	32.31	30.22	0.9952	3914.97	0.02911	363.378	403.928	368.476	12.2115	3.60458	Main stem
21/08/2016 03:23	111.696	2.29119	3.7	4516.36	LI820	32.56	30.26	0.9952	3904.4	0.02909	362.673	403.137	367.76	12.2234	3.59479	Main stem
21/08/2016 03:24	111.698	2.29069	3.6	4425.51	LI820	32.66	30.3	0.9952	3815.23	0.02906	361.969	402.348	367.045	12.2353	3.50326	Main stem
21/08/2016 03:25	111.7	2.29006	3.5	4425.51	LI820	32.62	30.34	0.9952	3827.13	0.02903	361.266	401.56	366.332	12.2472	3.51524	Main stem
21/08/2016 03:26	111.702	2.28945	3.4	4483.2	LI820	32.44	30.38	0.9952	3912.75	0.029	360.565	400.774	365.62	12.2591	3.60268	Main stem
21/08/2016 03:27	111.704	2.28877	3.3	4537.68	LI820	32.34	30.41	0.9952	3981.33	0.02898	360.041	400.186	365.088	12.2681	3.67305	Main stem
21/08/2016 03:28	111.706	2.28803	3.2	4586.21	LI820	32.43	30.43	0.9952	4011.99	0.02897	359.691	399.794	364.733	12.274	3.70496	Main stem
21/08/2016 03:29	111.707	2.28697	3.1	4622.61	LI820	32.51	30.45	0.9952	4032.96	0.02896	359.342	399.403	364.379	12.28	3.72696	Main stem
21/08/2016 03:30	111.709	2.28605	3	4634.75	LI820	32.46	30.47	0.9952	4055.15	0.02894	358.994	399.011	364.025	12.286	3.74892	Main stem
21/08/2016 03:31	111.711	2.28516	2.9	4664.96	LI820	32.35	30.49	0.9952	4103.74	0.02893	358.646	398.621	363.671	12.2919	3.79921	Main stem
21/08/2016 03:32	111.713	2.28441	2.8	4692.2	LI820	32.28	30.52	0.9952	4145.9	0.02891	358.124	398.036	363.141	12.3009	3.84253	Main stem
21/08/2016 03:33	111.714	2.28348	2.7	4716.46	LI820	32.22	30.56	0.9952	4185.54	0.02888	357.43	397.257	362.437	12.3129	3.88287	Main stem
21/08/2016 03:34	111.716	2.28243	2.6	4737.76	LI820	32.28	30.6	0.9952	4200.44	0.02885	356.737	396.48	361.733	12.3248	3.89786	Main stem
21/08/2016 03:35	111.718	2.28144	2.5	4746.68	LI820	32.41	30.64	0.9952	4192.25	0.02882	356.046	395.704	361.031	12.3368	3.88921	Main stem
21/08/2016 03:36	111.72	2.28048	2.4	4755.85	LI820	32.46	30.68	0.9951	4197.67	0.0288	355.356	394.93	360.218	12.3507	3.89649	Main stem
21/08/2016 03:37	111.721	2.27953	2.3	4755.85	LI820	32.6	30.66	0.9951	4169.46	0.02881	355.7	395.317	360.568	12.3447	3.86705	Main stem
21/08/2016 03:38	111.722	2.27923	2.2	4755.86	LI820	32.66	30.6	0.9951	4148.01	0.02885	356.737	396.48	361.62	12.3268	3.84482	Main stem
21/08/2016 03:39	111.722	2.27918	2.2	4755.86	LI820	32.65	30.54	0.9951	4140.55	0.0289	357.777	397.646	362.675	12.3088	3.83823	Main stem
21/08/2016 03:40	111.722	2.27913	2.2	4749.68	LI820	32.71	30.48	0.9951	4113.88	0.02894	358.82	398.816	363.734	12.2909	3.81062	Main stem
21/08/2016 03:41	111.723	2.27852	2.1	4749.69	LI820	32.66	30.42	0.9951	4114.03	0.02898	359.866	399.99	364.796	12.273	3.81048	Main stem
21/08/2016 03:42	111.725	2.27805	2	4740.78	LI820	32.63	30.41	0.9951	4107.96	0.02899	360.041	400.186	364.973	12.27	3.80465	Main stem
21/08/2016 03:43	111.727	2.27759	1.9	4728.65	LI820	32.6	30.43	0.9951	4104.82	0.02898	359.691	399.794	364.618	12.276	3.80197	Main stem
21/08/2016 03:44	111.729	2.27709	1.8	4716.53	LI820	32.64	30.45	0.9951	4092.61	0.02897	359.342	399.403	364.264	12.2819	3.79	Main stem
21/08/2016 03:45	111.731	2.27686	1.7	4695.24	LI820	32.68	30.47	0.9951	4070.92	0.02895	358.994	399.011	363.91	12.2879	3.767	Main stem
21/08/2016 03:46	111.733	2.2763	1.6	4662.07	LI820	32.78	30.49	0.9951	4029.49	0.02894	358.646	398.621	363.557	12.2939	3.72508	Main stem
21/08/2016 03:47	111.735	2.27582	1.5	4586.31	LI820	32.7	30.46	0.9951	3970.29	0.02896	359.168	399.207	364.087	12.2849	3.66428	Main stem
21/08/2016 03:48	111.737	2.27529	1.4	4571.21	LI820	32.67	30.4	0.9951	3951.06	0.029	360.216	400.382	365.15	12.267	3.64429	Main stem
21/08/2016 03:49	111.738	2.2748	1.3	4571.22	LI820	32.74	30.34	0.9951	3930.16	0.02905	361.266	401.56	366.217	12.2491	3.62384	Main stem
21/08/2016 03:50	111.74	2.27385	1.2	4562.06	LI820	32.77	30.28	0.9951	3909.05	0.02909	362.32	402.742	367.287	12.2313	3.60191	Main stem
21/08/2016 03:51	111.742	2.27282	1.1	4546.97	LI820	32.92	30.22	0.9951	3861.47	0.02913	363.378	403.928	368.36	12.2135	3.55285	Main stem
21/08/2016 03:52	111.743	2.27152	1	4546.97	LI820	32.83	30.21	0.9951	3874.83	0.02914	363.554	404.126	368.539	12.2105	3.5669	Main stem
21/08/2016 03:53	111.744	2.27012	0.9	4528.66	LI820	32.73	30.23	0.995	3880.87	0.02913	363.201	403.73	368.065	12.2183	3.5742	Main stem
21/08/2016 03:54	111.745	2.26879	0.8	4501.43	LI820	32.7	30.25	0.995	3864.83	0.02912	362.849	403.335	367.707	12.2243	3.55827	Main stem
21/08/2016 03:55	111.746	2.26718	0.8	4456.12	LI820	32.71	30.27	0.995	3828.2	0.0291	362.496	402.94	367.35	12.2302	3.52001	Main stem
21/08/2016 03:56	111.747	2.2655	0.7	4462.07	LI820	32.69	30.29	0.995	3840.46	0.02909	362.145	402.545	366.993	12.2362	3.53308	Main stem
21/08/2016 03:57	111.748	2.2639	0.6	4462.08	LI820	32.63	30.28	0.995	3847.52	0.0291	362.32	402.742	367.171	12.2332	3.54067	Main stem
21/08/2016 03:58	111.749	2.26225	0.5	4462.08	LI820	32.65	30.24	0.995	3836.06	0.02913	363.025	403.532	367.886	12.2213	3.52912	Main stem
21/08/2016 03:59	111.75	2.26057	0.5	4462.09	LI820	32.61	30.2	0.995	3835.37	0.02916	363.731	404.324	368.602	12.2094	3.52862	Main stem
21/08/2016 04:00	111.751	2.25898	0.4	4446.99	LI820	32.62	30.16	0.995	3813.74	0.02919	364.439	405.117	369.32	12.1976	3.50663	Main stem
21/08/2016 04:01	111.752	2.25738	0.3	4422.73	LI820	32.66	30.12	0.995	3779.72	0.02922	365.148	405.912	370.039	12.1857	3.47194	Main stem
21/08/2016 04:02	111.753	2.25575	0.2	4392.53	LI820	32.63	30.09	0.995	3757.17	0.02924	365.68	406.509	370.58	12.1768	3.44866	Main stem
21/08/2016 04:03	111.753	2.25412	0.2	4328.9	LI820	32.57	30.07	0.995	3708.93	0.02925	366.036	406.908	370.941	12.1709	3.3987	Main stem
21/08/2016 04:04	111.754	2.25256	0.1	4119.94	LI820	32.54	30.05	0.995	3531.8	0.02927	366.392	407.307	371.302	12.165	3.21772	Main stem
21/08/2016 04:05	111.755	2.25108	0	4119.94	LI820	32.58	30.03	0.995	3523.25	0.02929	366.748	407.706	371.663	12.1591	3.20959	Main stem
21/08/2016 04:06	111.756	2.24991	0	4138.02	LI820	32.59	30.01	0.995	3533.08	0.0293	367.105	408.106	372.025	12.1531	3.2192	Main stem
21/08/2016 04:07	111.757	2.24977	0	4162.29	LI820	32.69	30.02	0.995	3542.52	0.02929	366.927	407.906	371.844	12.1561	3.22857	Main stem
21/08/2016 04:08	111.757	2.24984	0	4153.14	LI820	32.79	30.06	0.995	3526.05	0.02926	366.214	407.107	371.121	12.1679	3.21151	Main stem
21/08/2016 04:09	111.757	2.24986	0	4101.64	LI820	32.91	30.1	0.995	3469.87	0.02923	365.503	406.31	370.4	12.1798	3.15374	Main stem
21/08/2016 04:10	111.757	2.24984	0	4092.49	LI820	32.91	30.14	0.9949	3468.8	0.0292	364.793	405.514	369.679	12.1916	3.15251	Main stem
21/08/2016 04:11	111.757	2.24985	0	4007.81	LI820	32.85	30.18	0.9949	3410.87	0.02918	364.085	404.72	368.845	12.2054	3.0945	Main stem
21/08/2016 04:12	111.757	2.24983	0	3959.29	LI820	32.74	30.19	0.9949	3384.53	0.02917	363.908	404.522	368.665	12.2084	3.06717	Main stem
21/08/2016 04:13	111.757	2.24986	0	4010.79	LI820	32.71	30.17	0.9949	3430.51	0.02919	364.262	404.919	369.024	12.2025	3.11495	Main stem
21/08/2016 04:14	111.757	2.24989	0	3944.19	LI820	32.68	30.15	0.9949	3375.52	0.0292	364.616	405.316	369.383	12.1965	3.0581	Main stem
21/08/2016 04:15	111.757	2.24983	0	3935.04	LI820	32.68	30.13	0.9949	3365.28	0.02922	364.97	405.713	369.743	12.1906	3.0482	Main stem
21/08/2016 04:16	111.757	2.24985	0	3959.31	LI820	32.8	30.11	0.9949	3365.32	0.02923	365.325	406.111	370.103	12.1847	3.0478	Main stem
21/08/2016 04:17	111.757	2.24984	0	4019.97	LI820	32.82	30.11	0.9949	3414.75	0.02923	365.325	406.111	370.103	12.1847	3.09851	Main stem
21/08/2016 04:18	111.757	2.24981	0	4095.74	LI820	32.78	30.13	0.9949	3487.22	0.02922	364.97	405.713	369.743	12.1906	3.1733	Main stem
21/08/2016 04:19	111.757	2.24979	0	4147.25	LI820	32.77	30.15	0.9949	3535.69	0.02921	364.616	405.316	369.383	12.1965	3.22349	Main stem
21/08/2016 04:20	111.757	2.24962	0	4180.43	LI820	32.77	30.17	0.9949	3567.47	0.02919	364.262	404.919	369.024	12.2025	3.25545	Main stem
21/08/2016 04:21	111.757	2.24969	0	4238.13	LI820	32.78	30.19	0.9949	3618.43	0.02918	363.908	404.522	368.665	12.2084	3.3082	Main stem
21/08/2016 04:22	111.757	2.24977	0	4171.53	LI820	32.79	30.2	0.9949	3560.37	0.02917	363.731	404.324	368.486	12.2114	3.24831	Main stem
21/08/2016 04:23	111.757	2.24966	0	4077.44	LI820	32.78	30.2	0.9949	3481.57	0.02917	363.731	404.324	368.486	12.2114	3.16747	Main stem
21/08/2016 04:24	111.757	2.24973	0	3971.48	LI820	32.73	30.2	0.9949	3397.97	0.02917	363.731	404.324	368.486	12.2114	3.08171	Main stem
21/08/2016 04:25	111.757	2.2497	0	3971.48	LI820	32.84	30.2	0.9949	3382.61	0.02917	363.731	404.324	368.486	12.2114	3.06595	Main stem
21/08/2016 04:26	111.757	2.24968	0	3898.69	LI820	32.95	30.2	0.9948	3304.28	0.02918	363.731	404.324	368.486	12.2114	2.98666	Main stem
21/08/2016 04:27	111.757	2.24969	0	3919.99	LI820	32.87	30.19	0.9948	3331.74	0.02918	363.908	404.522	368.665	12.2084	3.0141	Main stem
21/08/2016 04:28	111.757	2.24971	0	3932.13	LI820	32.87	30.17	0.9948	3339.22	0.0292	364.262	404.919	369.024	12.2025	3.02238	Main stem
21/08/2016 04:29	111.757	2.24966	0	3780.6	LI820	32.88	30.15	0.9948	3207.05	0.02922	364.616	405.316	369.267	12.1984	2.88778	Main stem
21/08/2016 04:30	111.757	2.24971	0	3756.34	LI820	32.87	30.13	0.9948	3184.68	0.02923	364.97	405.713	369.627	12.1925	2.8644	Main stem
21/08/2016 04:31	111.757	2.24969	0	3735.3	LI820	32.91	30.11	0.9948	3159	0.02925	365.325	406.111	369.986	12.1866	2.8386	Main stem
21/08/2016 04:32	111.757	2.24969	0	3686.77	LI820	32.9	30.11	0.9948	3119.83	0.02924	365.325	406.111	369.986	12.1866	2.79743	Main stem
21/08/2016 04:33	111.757	2.24971	0	3671.67	LI820	32.87	30.13	0.9948	3113.75	0.02923	364.97	405.713	369.627	12.1925	2.7916	Main stem
21/08/2016 04:34	111.757	2.24976	0	3632.31	LI820	32.77	30.15	0.9948	3095.29	0.02922	364.616	405.316	369.267	12.1984	2.77305	Main stem
21/08/2016 04:35	111.757	2.2497	0	3653.36	LI820	32.83	30.17	0.9948	3108.02	0.0292	364.262	404.919	368.908	12.2044	2.78557	Main stem
21/08/2016 04:36	111.757	2.24969	0	3680.6	LI820	32.85	30.19	0.9948	3131.21	0.02919	363.908	404.522	368.549	12.2103	2.80977	Main stem
21/08/2016 04:37	111.757	2.24972	0	3686.8	LI820	32.9	30.21	0.9948	3133.13	0.02917	363.554	404.126	368.191	12.2163	2.81118	Main stem
21/08/2016 04:38	111.757	2.24966	0	3744.24	LI820	32.86	30.23	0.9948	3189.13	0.02916	363.201	403.73	367.833	12.2222	2.86906	Main stem
21/08/2016 04:39	111.757	2.24962	0	3720.23	LI820	32.82	30.25	0.9948	3176.72	0.02915	362.849	403.335	367.476	12.2281	2.85674	Main stem
21/08/2016 04:40	111.757	2.24944	0	3641.25	LI820	32.79	30.27	0.9948	3116.3	0.02913	362.496	402.94	367.119	12.2341	2.79415	Main stem
21/08/2016 04:41	111.757	2.24925	0	3641.25	LI820	32.87	30.29	0.9948	3107.72	0.02912	362.145	402.545	366.762	12.24	2.78574	Main stem
21/08/2016 04:42	111.757	2.24819	0.1	3592.98	LI820	32.85	30.26	0.9948	3064.46	0.02914	362.673	403.137	367.297	12.2311	2.74122	Main stem
21/08/2016 04:43	111.759	2.24751	0.1	3659.59	LI820	32.83	30.2	0.9947	3117.53	0.02918	363.731	404.324	368.37	12.2133	2.79549	Main stem
21/08/2016 04:44	111.76	2.24729	0	3726.2	LI820	32.79	30.14	0.9947	3171.63	0.02923	364.793	405.514	369.447	12.1955	2.85174	Main stem
21/08/2016 04:45	111.762	2.24726	0	3711.1	LI820	32.77	30.08	0.9947	3154.68	0.02927	365.858	406.708	370.527	12.1777	2.83408	Main stem
21/08/2016 04:46	111.763	2.24743	0	3747.5	LI820	32.78	30.02	0.9947	3176.74	0.02932	366.927	407.906	371.493	12.1618	2.85788	Main stem
21/08/2016 04:47	111.765	2.24768	0	3783.65	LI820	32.7	30.01	0.9947	3216.81	0.02933	367.105	408.106	371.674	12.1589	2.89931	Main stem
21/08/2016 04:48	111.766	2.24814	0	3829.22	LI820	32.65	30.03	0.9947	3264.55	0.02931	366.748	407.706	371.312	12.1648	2.94777	Main stem
21/08/2016 04:49	111.768	2.24895	0	3868.59	LI820	32.65	30.05	0.9947	3301.27	0.0293	366.392	407.307	370.951	12.1707	2.98591	Main stem
21/08/2016 04:50	111.769	2.24987	0	3904.99	LI820	32.64	30.07	0.9947	3336.29	0.02928	366.036	406.908	370.59	12.1766	3.02128	Main stem
21/08/2016 04:51	111.77	2.25076	0	3932.23	LI820	32.78	30.09	0.9947	3341.63	0.02927	365.68	406.509	370.23	12.1826	3.0272	Main stem
21/08/2016 04:52	111.772	2.25182	0	3962.45	LI820	33	30.11	0.9947	3339.45	0.02926	365.325	406.111	369.87	12.1885	3.0254	Main stem
21/08/2016 04:53	111.773	2.25286	0	3986.72	LI820	33.16	30.13	0.9947	3339.25	0.02924	364.97	405.713	369.51	12.1944	3.0246	Main stem
21/08/2016 04:54	111.774	2.25404	0	4017.18	LI820	33.35	30.15	0.9947	3340.5	0.02923	364.616	405.316	369.151	12.2004	3.02632	Main stem
21/08/2016 04:55	111.776	2.25519	0	4041.2	LI820	33.47	30.17	0.9947	3346.71	0.02922	364.262	404.919	368.792	12.2063	3.03314	Main stem
21/08/2016 04:56	111.777	2.25621	0	4068.69	LI820	33.64	30.19	0.9947	3347.68	0.0292	363.908	404.522	368.433	12.2122	3.03353	Main stem
21/08/2016 04:57	111.779	2.25707	0	4086.77	LI820	33.57	30.19	0.9947	3371.68	0.02921	363.908	404.522	368.433	12.2122	3.05923	Main stem
21/08/2016 04:58	111.78	2.25757	0	4108.07	LI820	33.49	30.17	0.9947	3397.45	0.02922	364.262	404.919	368.792	12.2063	3.08526	Main stem
21/08/2016 04:59	111.782	2.25818	0	4123.18	LI820	33.49	30.15	0.9947	3407.74	0.02924	364.616	405.316	369.151	12.2004	3.09644	Main stem
21/08/2016 05:00	111.783	2.25824	0	4114.02	LI820	33.48	30.13	0.9946	3398.84	0.02925	364.97	405.713	369.51	12.1944	3.08689	Main stem
21/08/2016 05:01	111.785	2.258	0	3986.75	LI820	33.59	30.11	0.9946	3276.48	0.02927	365.325	406.111	369.87	12.1885	2.96178	Main stem
21/08/2016 05:02	111.786	2.25737	0	3959.52	LI820	33.64	30.08	0.9946	3242.85	0.02929	365.858	406.708	370.41	12.1796	2.92709	Main stem
21/08/2016 05:03	111.788	2.25644	0	3917.19	LI820	33.5	30.04	0.9946	3220.42	0.02932	366.57	407.506	371.131	12.1678	2.90419	Main stem
21/08/2016 05:04	111.789	2.25509	0	3944.43	LI820	33.3	30	0.9946	3264.35	0.02935	367.283	408.306	371.737	12.1578	2.94994	Main stem
21/08/2016 05:05	111.789	2.2536	0	3971.67	LI820	33.29	29.96	0.9946	3283.59	0.02938	367.998	409.107	372.462	12.146	2.96985	Main stem
21/08/2016 05:06	111.789	2.25209	0	3995.94	LI820	33.31	29.92	0.9946	3295.52	0.02941	368.715	409.91	373.187	12.1342	2.98226	Main stem
21/08/2016 05:07	111.789	2.25064	0	3995.94	LI820	33.36	29.9	0.9946	3286.73	0.02942	369.073	410.312	373.551	12.1283	2.97279	Main stem
21/08/2016 05:08	111.789	2.24922	0	4008.08	LI820	33.45	29.9	0.9946	3284.62	0.02942	369.073	410.312	373.551	12.1283	2.97062	Main stem
21/08/2016 05:09	111.789	2.24779	0	4035.32	LI820	33.35	29.9	0.9946	3320.76	0.02942	369.073	410.312	373.551	12.1283	3.00776	Main stem
21/08/2016 05:10	111.789	2.24631	0	4056.62	LI820	33.35	29.9	0.9946	3338.25	0.02942	369.073	410.312	373.551	12.1283	3.02573	Main stem
21/08/2016 05:11	111.789	2.24485	0	4074.7	LI820	33.36	29.9	0.9946	3351.66	0.02942	369.073	410.312	373.551	12.1283	3.03951	Main stem
21/08/2016 05:12	111.789	2.24341	0	4083.87	LI820	33.45	29.9	0.9946	3346.44	0.02943	369.073	410.312	373.551	12.1283	3.03518	Main stem
21/08/2016 05:13	111.789	2.2419	0	4092.79	LI820	33.46	29.9	0.9946	3352.52	0.02943	369.073	410.312	373.551	12.1283	3.04143	Main stem
21/08/2016 05:14	111.789	2.24056	0	4101.96	LI820	33.38	29.9	0.9946	3371.64	0.02943	369.073	410.312	373.551	12.1283	3.06108	Main stem
21/08/2016 05:15	111.79	2.23924	0	4108.15	LI820	33.38	29.9	0.9946	3376.79	0.02943	369.073	410.312	373.551	12.1283	3.06638	Main stem
21/08/2016 05:16	111.79	2.23798	0	4108.16	LI820	33.42	29.9	0.9946	3371.14	0.02943	369.073	410.312	373.551	12.1283	3.06057	Main stem
21/08/2016 05:17	111.791	2.2367	0	4108.16	LI820	33.44	29.9	0.9945	3368.98	0.02943	369.073	410.312	373.551	12.1283	3.05839	Main stem
21/08/2016 05:18	111.792	2.23545	0.1	4108.17	LI820	33.36	29.9	0.9945	3379.57	0.02943	369.073	410.312	373.551	12.1283	3.06927	Main stem
21/08/2016 05:19	111.793	2.23434	0.2	4108.17	LI820	33.38	29.9	0.9945	3376.81	0.02943	369.073	410.312	373.551	12.1283	3.06644	Main stem
21/08/2016 05:20	111.794	2.23317	0.3	4101.98	LI820	33.39	29.9	0.9945	3371.33	0.02943	369.073	410.312	373.551	12.1283	3.0608	Main stem
21/08/2016 05:21	111.795	2.23196	0.5	4083.91	LI820	33.19	29.9	0.9945	3384.53	0.02943	369.073	410.312	373.551	12.1283	3.07437	Main stem
21/08/2016 05:22	111.796	2.23103	0.6	4032.41	LI820	33.07	29.9	0.9945	3359.49	0.02943	369.073	410.312	373.433	12.1302	3.04911	Main stem
21/08/2016 05:23	111.797	2.2303	0.6	3953.68	LI820	33.02	29.9	0.9945	3300	0.02943	369.073	410.312	373.433	12.1302	2.98795	Main stem
21/08/2016 05:24	111.799	2.22969	0.6	3941.55	LI820	32.99	29.9	0.9945	3294.74	0.02943	369.073	410.312	373.433	12.1302	2.98254	Main stem
21/08/2016 05:25	111.8	2.22916	0.6	3871.73	LI820	32.93	29.9	0.9945	3243.56	0.02943	369.073	410.312	373.433	12.1302	2.92992	Main stem
21/08/2016 05:26	111.802	2.22895	0.6	3886.83	LI820	32.89	29.9	0.9945	3262.5	0.02944	369.073	410.312	373.433	12.1302	2.9504	Main stem
21/08/2016 05:27	111.803	2.22878	0.5	3908.13	LI820	32.93	29.91	0.9945	3275.85	0.02943	368.894	410.111	373.251	12.1332	2.96384	Main stem
21/08/2016 05:28	111.805	2.22895	0.4	3932.41	LI820	32.96	29.93	0.9945	3294.9	0.02941	368.535	409.709	372.888	12.1391	2.98286	Main stem
21/08/2016 05:29	111.806	2.22927	0.3	3953.71	LI820	32.96	29.95	0.9945	3314.55	0.0294	368.177	409.308	372.525	12.145	3.0035	Main stem
21/08/2016 05:30	111.807	2.22989	0.1	3968.81	LI820	33.04	29.97	0.9945	3318.21	0.02939	367.819	408.907	372.163	12.1509	3.0077	Main stem
21/08/2016 05:31	111.809	2.23052	0	3983.92	LI820	33.16	29.99	0.9945	3317.62	0.02937	367.462	408.506	371.801	12.1568	3.00651	Main stem
21/08/2016 05:32	111.81	2.23129	0	3983.93	LI820	33.44	30.01	0.9945	3280.24	0.02936	367.105	408.106	371.439	12.1627	2.96851	Main stem
21/08/2016 05:33	111.81	2.23138	0	3968.83	LI820	33.76	30.03	0.9945	3226.01	0.02934	366.748	407.706	371.078	12.1686	2.91217	Main stem
21/08/2016 05:34	111.81	2.23148	0	3978	LI820	34.03	30.05	0.9944	3200	0.02933	366.392	407.307	370.717	12.1746	2.88589	Main stem
21/08/2016 05:35	111.81	2.23158	0	3993.1	LI820	34.08	30.07	0.9944	3207.51	0.02932	366.036	406.908	370.357	12.1805	2.89403	Main stem
21/08/2016 05:36	111.811	2.23235	0	4005.24	LI820	34.03	30.09	0.9944	3226.7	0.0293	365.68	406.509	369.996	12.1864	2.9132	Main stem
21/08/2016 05:37	111.812	2.23358	0	4011.19	LI820	34.02	30.1	0.9944	3234.43	0.0293	365.503	406.31	369.817	12.1894	2.92186	Main stem
21/08/2016 05:38	111.813	2.23481	0	4020.36	LI820	34.05	30.1	0.9944	3237.15	0.0293	365.503	406.31	369.817	12.1894	2.92465	Main stem
21/08/2016 05:39	111.814	2.23609	0	4014.17	LI820	33.94	30.1	0.9944	3249.17	0.0293	365.503	406.31	369.7	12.1913	2.93748	Main stem
21/08/2016 05:40	111.815	2.23742	0	3905.22	LI820	33.94	30.1	0.9944	3159.19	0.0293	365.503	406.31	369.7	12.1913	2.84491	Main stem
21/08/2016 05:41	111.815	2.23872	0	3905.23	LI820	33.88	30.1	0.9944	3167.65	0.0293	365.503	406.31	369.7	12.1913	2.85362	Main stem
21/08/2016 05:42	111.816	2.24016	0	3923.31	LI820	34.03	30.1	0.9944	3161.69	0.0293	365.503	406.31	369.7	12.1913	2.84749	Main stem
21/08/2016 05:43	111.817	2.2416	0	3917.37	LI820	34.15	30.1	0.9944	3141.77	0.0293	365.503	406.31	369.7	12.1913	2.82699	Main stem
21/08/2016 05:44	111.817	2.24314	0	3923.32	LI820	34.12	30.1	0.9944	3149.81	0.0293	365.503	406.31	369.7	12.1913	2.83526	Main stem
21/08/2016 05:45	111.817	2.24471	0	3923.32	LI820	34.11	30.1	0.9944	3151.81	0.0293	365.503	406.31	369.7	12.1913	2.83732	Main stem
21/08/2016 05:46	111.817	2.24626	0	3911.19	LI820	34.17	30.1	0.9944	3134.99	0.0293	365.503	406.31	369.7	12.1913	2.82002	Main stem
21/08/2016 05:47	111.817	2.24767	0	3820.32	LI820	34.22	30.08	0.9944	3051.42	0.02932	365.858	406.708	370.06	12.1854	2.73458	Main stem
21/08/2016 05:48	111.816	2.24911	0	3841.62	LI820	34.13	30.04	0.9944	3075.6	0.02935	366.57	407.506	370.781	12.1735	2.7596	Main stem
21/08/2016 05:49	111.815	2.25037	0	3865.89	LI820	34.08	30	0.9944	3096.34	0.02938	367.283	408.306	371.503	12.1617	2.78108	Main stem
21/08/2016 05:50	111.814	2.25154	0	3883.97	LI820	34.13	29.96	0.9944	3099.58	0.02941	367.998	409.107	372.227	12.1498	2.78454	Main stem
21/08/2016 05:51	111.813	2.2527	0	3893.14	LI820	33.96	29.92	0.9943	3124.45	0.02944	368.715	409.91	372.952	12.138	2.81031	Main stem
21/08/2016 05:52	111.812	2.254	0	3893.14	LI820	33.71	29.89	0.9943	3153.91	0.02946	369.253	410.513	373.497	12.1292	2.84048	Main stem
21/08/2016 05:53	111.811	2.25517	0	3878.04	LI820	33.82	29.87	0.9943	3124.51	0.02948	369.612	410.916	373.861	12.1233	2.81076	Main stem
21/08/2016 05:54	111.81	2.25622	0	3747.8	LI820	33.95	29.85	0.9943	3000.97	0.02949	369.972	411.319	374.225	12.1174	2.68321	Main stem
21/08/2016 05:55	111.81	2.25731	0	3756.72	LI820	34.09	29.83	0.9943	2987.34	0.02951	370.332	411.722	374.589	12.1115	2.66969	Main stem
21/08/2016 05:56	111.809	2.25852	0	3617.56	LI820	34.16	29.81	0.9943	2866.14	0.02952	370.692	412.126	374.954	12.1056	2.54456	Main stem
21/08/2016 05:57	111.808	2.25983	0	3629.69	LI820	34.29	29.8	0.9943	2858.45	0.02953	370.873	412.328	375.018	12.1045	2.53729	Main stem
21/08/2016 05:58	111.808	2.26123	0	3544.76	LI820	34.41	29.8	0.9943	2777.66	0.02953	370.873	412.328	375.018	12.1045	2.45412	Main stem
21/08/2016 05:59	111.807	2.26265	0	3587.11	LI820	34.41	29.8	0.9943	2810.77	0.02953	370.873	412.328	375.018	12.1045	2.4882	Main stem
21/08/2016 06:00	111.807	2.26408	0	3508.37	LI820	34.59	29.8	0.9943	2728.84	0.02953	370.873	412.328	375.018	12.1045	2.40386	Main stem
21/08/2016 06:01	111.807	2.26552	0	3493.27	LI820	34.64	29.8	0.9943	2711.04	0.02953	370.873	412.328	375.018	12.1045	2.38554	Main stem
21/08/2016 06:02	111.807	2.26703	0	3466.03	LI820	34.52	29.81	0.9943	2704.87	0.02953	370.692	412.126	374.836	12.1075	2.37976	Main stem
21/08/2016 06:03	111.807	2.26852	0	3502.44	LI820	34.61	29.83	0.9943	2724.8	0.02951	370.332	411.722	374.471	12.1134	2.39983	Main stem
21/08/2016 06:04	111.807	2.26992	0	3566.08	LI820	34.64	29.85	0.9943	2772.79	0.0295	369.972	411.319	374.107	12.1193	2.4496	Main stem
21/08/2016 06:05	111.808	2.27127	0	3635.67	LI820	34.67	29.87	0.9943	2826.16	0.02948	369.612	410.916	373.743	12.1252	2.50407	Main stem
21/08/2016 06:06	111.808	2.27262	0	3650.78	LI820	34.66	29.89	0.9943	2841.54	0.02947	369.253	410.513	373.379	12.1311	2.52027	Main stem
21/08/2016 06:07	111.808	2.27395	0	3681	LI820	34.63	29.9	0.9942	2869.25	0.02946	369.073	410.312	373.197	12.134	2.5486	Main stem
21/08/2016 06:08	111.809	2.27533	0	3490.33	LI820	34.33	29.9	0.9942	2755.19	0.02947	369.073	410.312	373.197	12.134	2.432	Main stem
21/08/2016 06:09	111.809	2.27671	0	3502.46	LI820	34.27	29.9	0.9942	2770.97	0.02947	369.073	410.312	373.197	12.134	2.44825	Main stem
21/08/2016 06:10	111.81	2.27807	0	3538.62	LI820	34.43	29.9	0.9942	2780.58	0.02947	369.073	410.312	373.197	12.134	2.45815	Main stem
21/08/2016 06:11	111.811	2.27946	0	3590.13	LI820	34.38	29.9	0.9942	2826.97	0.02947	369.073	410.312	373.197	12.134	2.50592	Main stem
21/08/2016 06:12	111.811	2.28083	0	3629.76	LI820	34.66	29.9	0.9942	2824.03	0.02947	369.073	410.312	373.197	12.134	2.5029	Main stem
21/08/2016 06:13	111.812	2.28232	0	3672.11	LI820	34.87	29.9	0.9942	2831.52	0.02947	369.073	410.312	373.197	12.134	2.51061	Main stem
21/08/2016 06:14	111.812	2.2838	0	3705.29	LI820	34.89	29.9	0.9942	2855.68	0.02947	369.073	410.312	373.079	12.136	2.53589	Main stem
21/08/2016 06:15	111.814	2.28492	0	3732.54	LI820	34.84	29.9	0.9942	2882.71	0.02947	369.073	410.312	373.079	12.136	2.56373	Main stem
21/08/2016 06:16	111.815	2.28596	0	3750.87	LI820	34.83	29.9	0.9942	2898.33	0.02947	369.073	410.312	373.079	12.136	2.57982	Main stem
21/08/2016 06:17	111.816	2.28667	0	3763.01	LI820	34.76	29.88	0.9942	2913.11	0.02949	369.433	410.714	373.443	12.13	2.59554	Main stem
21/08/2016 06:18	111.818	2.28701	0	3778.11	LI820	34.79	29.84	0.9942	2915.9	0.02952	370.152	411.52	374.171	12.1182	2.59853	Main stem
21/08/2016 06:19	111.819	2.28711	0	3790.25	LI820	34.74	29.8	0.9942	2926.64	0.02955	370.873	412.328	374.9	12.1065	2.6097	Main stem
21/08/2016 06:20	111.821	2.28724	0	3790.26	LI820	34.71	29.76	0.9942	2926.59	0.02958	371.595	413.137	375.63	12.0947	2.60976	Main stem
21/08/2016 06:21	111.822	2.28712	0	3772.19	LI820	34.54	29.72	0.9942	2929.07	0.02961	372.319	413.948	376.363	12.0829	2.61242	Main stem
21/08/2016 06:22	111.823	2.28694	0	3778.13	LI820	34.51	29.71	0.9942	2937.12	0.02961	372.5	414.151	376.546	12.08	2.62008	Main stem
21/08/2016 06:23	111.825	2.28683	0	3790.27	LI820	34.52	29.73	0.9942	2947.42	0.0296	372.138	413.745	376.18	12.0858	2.63108	Main stem
21/08/2016 06:24	111.825	2.28681	0	3790.28	LI820	34.3	29.75	0.9941	2977.77	0.02958	371.776	413.34	375.813	12.0917	2.66189	Main stem
21/08/2016 06:25	111.826	2.28679	0	3699.4	LI820	34.21	29.77	0.9941	2920.14	0.02957	371.414	412.935	375.448	12.0976	2.60291	Main stem
21/08/2016 06:26	111.826	2.28676	0	3693.21	LI820	34.2	29.79	0.9941	2918.57	0.02956	371.053	412.53	375.082	12.1035	2.60168	Main stem
21/08/2016 06:27	111.826	2.28677	0	3584.26	LI820	34.2	29.8	0.9941	2833.64	0.02955	370.873	412.328	374.9	12.1065	2.51393	Main stem
21/08/2016 06:28	111.826	2.28677	0	3532.75	LI820	34.26	29.8	0.9941	2784.6	0.02955	370.873	412.328	374.9	12.1065	2.4634	Main stem
21/08/2016 06:29	111.826	2.28678	0	3557.03	LI820	34.09	29.8	0.9941	2824.31	0.02955	370.873	412.328	374.9	12.1065	2.50431	Main stem
21/08/2016 06:30	111.826	2.28676	0	3599.38	LI820	33.99	29.8	0.9941	2869.93	0.02955	370.873	412.328	374.9	12.1065	2.55132	Main stem
21/08/2016 06:31	111.826	2.28675	0	3638.75	LI820	33.94	29.8	0.9941	2907.35	0.02955	370.873	412.328	374.9	12.1065	2.58987	Main stem
21/08/2016 06:32	111.826	2.28676	0	3681.1	LI820	34.08	29.8	0.9941	2925.03	0.02956	370.873	412.328	374.781	12.1084	2.60938	Main stem
21/08/2016 06:33	111.826	2.28677	0	3720.73	LI820	34.13	29.8	0.9941	2950.27	0.02956	370.873	412.328	374.781	12.1084	2.6354	Main stem
21/08/2016 06:34	111.826	2.28676	0	3511.48	LI820	34.05	29.8	0.9941	2794.39	0.02956	370.873	412.328	374.781	12.1084	2.47472	Main stem
21/08/2016 06:35	111.826	2.28673	0	3517.68	LI820	33.93	29.8	0.9941	2813.58	0.02956	370.873	412.328	374.781	12.1084	2.4945	Main stem
21/08/2016 06:36	111.826	2.28677	0	3569.19	LI820	33.89	29.8	0.9941	2859.45	0.02956	370.873	412.328	374.781	12.1084	2.54178	Main stem
21/08/2016 06:37	111.826	2.28679	0	3614.51	LI820	33.91	29.8	0.9941	2894.03	0.02956	370.873	412.328	374.781	12.1084	2.57743	Main stem
21/08/2016 06:38	111.826	2.28677	0	3657.11	LI820	33.75	29.8	0.9941	2947.32	0.02956	370.873	412.328	374.781	12.1084	2.63236	Main stem
21/08/2016 06:39	111.826	2.28676	0	3690.3	LI820	33.74	29.8	0.9941	2975.54	0.02956	370.873	412.328	374.781	12.1084	2.66145	Main stem
21/08/2016 06:40	111.826	2.28676	0	3723.73	LI820	33.73	29.8	0.9941	3003.53	0.02956	370.873	412.328	374.781	12.1084	2.6903	Main stem
21/08/2016 06:41	111.826	2.28674	0	3741.81	LI820	33.73	29.8	0.994	3018.6	0.02956	370.873	412.328	374.781	12.1084	2.70588	Main stem
21/08/2016 06:42	111.826	2.28675	0	3756.92	LI820	33.77	29.8	0.994	3024.49	0.02956	370.873	412.328	374.781	12.1084	2.71195	Main stem
21/08/2016 06:43	111.826	2.28674	0	3772.28	LI820	33.77	29.8	0.994	3036.66	0.02956	370.873	412.328	374.781	12.1084	2.72449	Main stem
21/08/2016 06:44	111.826	2.28677	0	3784.17	LI820	33.77	29.8	0.994	3046.1	0.02956	370.873	412.328	374.781	12.1084	2.73422	Main stem
21/08/2016 06:45	111.826	2.28676	0	3760.16	LI820	33.82	29.8	0.994	3019.5	0.02956	370.873	412.328	374.781	12.1084	2.7068	Main stem
21/08/2016 06:46	111.826	2.28676	0	3778.24	LI820	33.92	29.8	0.994	3020.23	0.02957	370.873	412.328	374.781	12.1084	2.70847	Main stem
21/08/2016 06:47	111.826	2.28674	0	3772.3	LI820	33.98	29.8	0.994	3009.95	0.02957	370.873	412.328	374.781	12.1084	2.69787	Main stem
21/08/2016 06:48	111.826	2.28676	0	3705.44	LI820	33.99	29.8	0.994	2954.19	0.02957	370.873	412.328	374.781	12.1084	2.64037	Main stem
21/08/2016 06:49	111.826	2.28677	0	3629.92	LI820	34.03	29.8	0.994	2888.18	0.02957	370.873	412.328	374.781	12.1084	2.57231	Main stem
21/08/2016 06:50	111.826	2.28675	0	3663.1	LI820	34.07	29.8	0.994	2908.9	0.02957	370.873	412.328	374.663	12.1103	2.59408	Main stem
21/08/2016 06:51	111.826	2.28675	0	3702.48	LI820	34.12	29.8	0.994	2935.28	0.02957	370.873	412.328	374.663	12.1103	2.62129	Main stem
21/08/2016 06:52	111.826	2.28676	0	3732.7	LI820	34.14	29.8	0.994	2955.61	0.02957	370.873	412.328	374.663	12.1103	2.64226	Main stem
21/08/2016 06:53	111.826	2.28674	0	3760.19	LI820	34.21	29.8	0.994	2968.49	0.02957	370.873	412.328	374.663	12.1103	2.65554	Main stem
21/08/2016 06:54	111.826	2.28673	0	3784.22	LI820	34.24	29.8	0.994	2984.02	0.02957	370.873	412.328	374.663	12.1103	2.67156	Main stem
21/08/2016 06:55	111.826	2.28674	0	3805.52	LI820	34.31	29.8	0.994	2993.08	0.02957	370.873	412.328	374.663	12.1103	2.6809	Main stem
21/08/2016 06:56	111.826	2.28673	0	3829.79	LI820	34.32	29.8	0.994	3009.54	0.02957	370.873	412.328	374.663	12.1103	2.69788	Main stem
21/08/2016 06:57	111.826	2.28675	0	3847.88	LI820	34.47	29.8	0.994	3004.54	0.02957	370.873	412.328	374.663	12.1103	2.69272	Main stem
21/08/2016 06:58	111.826	2.28677	0	3869.18	LI820	34.52	29.8	0.9939	3015.54	0.02957	370.873	412.328	374.663	12.1103	2.7041	Main stem
21/08/2016 06:59	111.826	2.28677	0	3884.29	LI820	34.46	29.8	0.9939	3034.95	0.02957	370.873	412.328	374.663	12.1103	2.72412	Main stem
21/08/2016 07:00	111.826	2.28676	0	3902.62	LI820	34.44	29.8	0.9939	3051.63	0.02958	370.873	412.328	374.663	12.1103	2.74225	Main stem
21/08/2016 07:01	111.826	2.28673	0	3920.7	LI820	34.47	29.8	0.9939	3061.96	0.02958	370.873	412.328	374.663	12.1103	2.75291	Main stem
21/08/2016 07:02	111.826	2.28674	0	3938.78	LI820	34.52	29.8	0.9939	3069.1	0.02958	370.873	412.328	374.663	12.1103	2.76028	Main stem
21/08/2016 07:03	111.826	2.28679	0	3947.95	LI820	34.56	29.8	0.9939	3071.39	0.02958	370.873	412.328	374.663	12.1103	2.76264	Main stem
21/08/2016 07:04	111.826	2.28678	0	3960.09	LI820	34.4	29.8	0.9939	3100.66	0.02958	370.873	412.328	374.663	12.1103	2.79284	Main stem
21/08/2016 07:05	111.826	2.28676	0	3966.29	LI820	34.34	29.8	0.9939	3113.99	0.02958	370.873	412.328	374.663	12.1103	2.80659	Main stem
21/08/2016 07:06	111.826	2.28675	0	3966.29	LI820	34.47	29.8	0.9939	3097.07	0.02958	370.873	412.328	374.663	12.1103	2.78913	Main stem
21/08/2016 07:07	111.826	2.28678	0	3966.3	LI820	34.58	29.8	0.9939	3083.18	0.02958	370.873	412.328	374.544	12.1122	2.77524	Main stem
21/08/2016 07:08	111.826	2.28679	0	3981.41	LI820	34.64	29.8	0.9939	3086.87	0.02958	370.873	412.328	374.544	12.1122	2.77905	Main stem
21/08/2016 07:09	111.826	2.28678	0	3999.49	LI820	34.68	29.8	0.9939	3095.49	0.02958	370.873	412.328	374.544	12.1122	2.78794	Main stem
21/08/2016 07:10	111.826	2.28675	0	4005.69	LI820	34.42	29.8	0.9939	3134.45	0.02958	370.873	412.328	374.544	12.1122	2.82814	Main stem
21/08/2016 07:11	111.826	2.28675	0	4005.69	LI820	34.21	29.8	0.9939	3161.37	0.02958	370.873	412.328	374.544	12.1122	2.85592	Main stem
21/08/2016 07:12	111.826	2.28677	0	3990.34	LI820	34.1	29.8	0.9939	3163.48	0.02958	370.873	412.328	374.544	12.1122	2.8581	Main stem
21/08/2016 07:13	111.826	2.28675	0	3969.3	LI820	34.25	29.8	0.9939	3127.28	0.02958	370.873	412.328	374.544	12.1122	2.82074	Main stem
21/08/2016 07:14	111.826	2.28677	0	3969.3	LI820	34.42	29.8	0.9939	3104.59	0.02959	370.873	412.328	374.544	12.1122	2.79828	Main stem
21/08/2016 07:15	111.826	2.28679	0	3969.31	LI820	34.43	29.8	0.9938	3104.21	0.02959	370.873	412.328	374.544	12.1122	2.79793	Main stem
21/08/2016 07:16	111.826	2.28676	0	3969.31	LI820	34.35	29.8	0.9938	3114	0.02959	370.873	412.328	374.544	12.1122	2.80803	Main stem
21/08/2016 07:17	111.826	2.28676	0	3984.42	LI820	34.33	29.8	0.9938	3130.42	0.02959	370.873	412.328	374.544	12.1122	2.82498	Main stem
21/08/2016 07:18	111.826	2.28675	0	3996.56	LI820	34.29	29.8	0.9938	3146.59	0.02959	370.873	412.328	374.544	12.1122	2.84167	Main stem
21/08/2016 07:19	111.826	2.28676	0	4017.86	LI820	34.03	29.8	0.9938	3197.57	0.02959	370.873	412.328	374.544	12.1122	2.89429	Main stem
21/08/2016 07:20	111.826	2.28675	0	4017.87	LI820	33.82	29.8	0.9938	3226.41	0.02959	370.873	412.328	374.544	12.1122	2.92406	Main stem
21/08/2016 07:21	111.826	2.28673	0	4017.87	LI820	33.75	29.8	0.9938	3236.8	0.02959	370.873	412.328	374.544	12.1122	2.93478	Main stem
21/08/2016 07:22	111.826	2.28672	0	4017.88	LI820	33.62	29.8	0.9938	3254.84	0.02959	370.873	412.328	374.544	12.1122	2.95341	Main stem
21/08/2016 07:23	111.826	2.28674	0	4017.88	LI820	33.56	29.8	0.9938	3262.31	0.02959	370.873	412.328	374.544	12.1122	2.96112	Main stem
21/08/2016 07:24	111.826	2.28675	0	4017.89	LI820	33.51	29.8	0.9938	3268.5	0.02959	370.873	412.328	374.544	12.1122	2.96751	Main stem
21/08/2016 07:25	111.826	2.28675	0	4017.89	LI820	33.53	29.8	0.9938	3265.24	0.02959	370.873	412.328	374.426	12.1141	2.96461	Main stem
21/08/2016 07:26	111.826	2.28674	0	4017.9	LI820	33.43	29.8	0.9938	3278.16	0.02959	370.873	412.328	374.426	12.1141	2.97795	Main stem
21/08/2016 07:27	111.826	2.28676	0	4023.84	LI820	33.43	29.8	0.9938	3282.35	0.02959	370.873	412.328	374.426	12.1141	2.98227	Main stem
21/08/2016 07:28	111.826	2.28674	0	4023.85	LI820	33.45	29.8	0.9938	3279.23	0.0296	370.873	412.328	374.426	12.1141	2.98006	Main stem
21/08/2016 07:29	111.826	2.28673	0	4014.69	LI820	33.4	29.8	0.9938	3279.46	0.0296	370.873	412.328	374.426	12.1141	2.9803	Main stem
21/08/2016 07:30	111.826	2.28671	0	4014.7	LI820	33.43	29.8	0.9938	3275.22	0.0296	370.873	412.328	374.426	12.1141	2.97592	Main stem
21/08/2016 07:31	111.826	2.28676	0	4014.7	LI820	33.5	29.8	0.9938	3265.09	0.0296	370.873	412.328	374.426	12.1141	2.96546	Main stem
21/08/2016 07:32	111.826	2.28673	0	4026.84	LI820	33.52	29.8	0.9937	3271.5	0.0296	370.873	412.328	374.426	12.1141	2.97212	Main stem
21/08/2016 07:33	111.826	2.28673	0	4026.85	LI820	33.62	29.8	0.9937	3257.41	0.0296	370.873	412.328	374.426	12.1141	2.95757	Main stem
21/08/2016 07:34	111.826	2.28673	0	4026.85	LI820	33.7	29.8	0.9937	3246.65	0.0296	370.873	412.328	374.426	12.1141	2.94645	Main stem
21/08/2016 07:35	111.826	2.28672	0	4026.85	LI820	33.63	29.8	0.9937	3257.25	0.0296	370.873	412.328	374.426	12.1141	2.9574	Main stem
21/08/2016 07:36	111.826	2.28675	0	4020.92	LI820	33.57	29.8	0.9937	3259.32	0.0296	370.873	412.328	374.426	12.1141	2.95954	Main stem
21/08/2016 07:37	111.826	2.28676	0	4011.76	LI820	33.61	29.8	0.9937	3247.71	0.0296	370.873	412.328	374.426	12.1141	2.94755	Main stem
21/08/2016 07:38	111.826	2.28675	0	3996.65	LI820	33.93	29.8	0.9937	3193.24	0.0296	370.873	412.328	374.426	12.1141	2.8913	Main stem
21/08/2016 07:39	111.826	2.28675	0	3848.07	LI820	34.01	29.8	0.9937	3063.35	0.0296	370.873	412.328	374.426	12.1141	2.75716	Main stem
21/08/2016 07:40	111.826	2.28674	0	3842.13	LI820	33.96	29.8	0.9937	3065.52	0.0296	370.873	412.328	374.426	12.1141	2.7594	Main stem
21/08/2016 07:41	111.826	2.28672	0	3736.14	LI820	34.02	29.8	0.9937	2972.53	0.0296	370.873	412.328	374.426	12.1141	2.66337	Main stem
21/08/2016 07:42	111.826	2.28673	0	3751.25	LI820	34.14	29.8	0.9937	2970.47	0.02961	370.873	412.328	374.426	12.1141	2.66214	Main stem
21/08/2016 07:43	111.826	2.28673	0	3645.25	LI820	34.04	29.8	0.9937	2898.36	0.02961	370.873	412.328	374.308	12.116	2.58806	Main stem
21/08/2016 07:44	111.826	2.28669	0	3675.47	LI820	34.05	29.8	0.9937	2920.48	0.02961	370.873	412.328	374.308	12.116	2.61091	Main stem
21/08/2016 07:45	111.826	2.28677	0	3699.75	LI820	34.13	29.8	0.9937	2929.44	0.02961	370.873	412.328	374.308	12.116	2.62017	Main stem
21/08/2016 07:46	111.826	2.28674	0	3736.16	LI820	34.06	29.8	0.9937	2967.79	0.02961	370.873	412.328	374.308	12.116	2.65979	Main stem
21/08/2016 07:47	111.826	2.28671	0	3772.57	LI820	33.92	29.8	0.9937	3013.13	0.02961	370.873	412.328	374.308	12.116	2.70664	Main stem
21/08/2016 07:48	111.826	2.28677	0	3805.76	LI820	33.93	29.8	0.9937	3039.37	0.02961	370.873	412.328	374.308	12.116	2.73375	Main stem
21/08/2016 07:49	111.826	2.28672	0	3833	LI820	33.99	29.8	0.9936	3054.2	0.02961	370.873	412.328	374.308	12.116	2.74911	Main stem
21/08/2016 07:50	111.826	2.28675	0	3854.31	LI820	33.91	29.8	0.9936	3082.29	0.02961	370.873	412.328	374.308	12.116	2.77814	Main stem
21/08/2016 07:51	111.826	2.28671	0	3878.58	LI820	33.88	29.8	0.9936	3106.4	0.02961	370.873	412.328	374.308	12.116	2.80305	Main stem
21/08/2016 07:52	111.826	2.28676	0	3896.67	LI820	34	29.8	0.9936	3104.65	0.02961	370.873	412.328	374.308	12.116	2.80124	Main stem
21/08/2016 07:53	111.826	2.28672	0	3917.97	LI820	34.04	29.8	0.9936	3116.42	0.02961	370.873	412.328	374.308	12.116	2.8134	Main stem
21/08/2016 07:54	111.826	2.28671	0	3936.05	LI820	34.06	29.8	0.9936	3127.49	0.02961	370.873	412.328	374.308	12.116	2.82484	Main stem
21/08/2016 07:55	111.826	2.28674	0	3948.19	LI820	34.07	29.8	0.9936	3137.21	0.02961	370.873	412.328	374.308	12.116	2.83488	Main stem
21/08/2016 07:56	111.826	2.28672	0	3933.09	LI820	34.03	29.8	0.9936	3130.84	0.02962	370.873	412.328	374.308	12.116	2.82925	Main stem
21/08/2016 07:57	111.826	2.28672	0	3923.93	LI820	33.97	29.8	0.9936	3131.78	0.02962	370.873	412.328	374.308	12.116	2.83023	Main stem
21/08/2016 07:58	111.826	2.28676	0	3930.13	LI820	33.96	29.8	0.9936	3137.67	0.02962	370.873	412.328	374.308	12.116	2.83631	Main stem
21/08/2016 07:59	111.826	2.28674	0	3942.27	LI820	33.95	29.8	0.9936	3147.64	0.02962	370.873	412.328	374.308	12.116	2.84662	Main stem
21/08/2016 08:00	111.826	2.28672	0	3954.41	LI820	33.97	29.8	0.9936	3155.47	0.02962	370.873	412.328	374.189	12.1179	2.85516	Main stem
21/08/2016 08:01	111.826	2.28675	0	3960.36	LI820	33.95	29.8	0.9936	3162.84	0.02962	370.873	412.328	374.189	12.1179	2.86278	Main stem
21/08/2016 08:02	111.826	2.28671	0	3969.53	LI820	33.94	29.8	0.9936	3171.44	0.02962	370.873	412.328	374.189	12.1179	2.87167	Main stem
21/08/2016 08:03	111.826	2.28675	0	3969.53	LI820	33.87	29.8	0.9936	3180.87	0.02962	370.873	412.328	374.189	12.1179	2.88142	Main stem
21/08/2016 08:04	111.826	2.2867	0	3975.48	LI820	33.66	29.8	0.9936	3214.57	0.02962	370.873	412.328	374.189	12.1179	2.91626	Main stem
21/08/2016 08:05	111.826	2.28673	0	3975.48	LI820	33.54	29.8	0.9935	3230.87	0.02962	370.873	412.328	374.189	12.1179	2.93315	Main stem
21/08/2016 08:06	111.826	2.28673	0	3984.65	LI820	33.56	29.8	0.9935	3235.49	0.02962	370.873	412.328	374.189	12.1179	2.93792	Main stem
21/08/2016 08:07	111.826	2.2867	0	3999.76	LI820	33.58	29.8	0.9935	3244.78	0.02962	370.873	412.328	374.189	12.1179	2.94753	Main stem
21/08/2016 08:08	111.826	2.28675	0	4014.88	LI820	33.55	29.8	0.9935	3261.83	0.02962	370.873	412.328	374.189	12.1179	2.96515	Main stem
21/08/2016 08:09	111.826	2.28676	0	4014.88	LI820	33.51	29.8	0.9935	3266.44	0.02962	370.873	412.328	374.189	12.1179	2.96992	Main stem
21/08/2016 08:10	111.826	2.28676	0	4021.08	LI820	33.48	29.8	0.9935	3276.34	0.02963	370.873	412.328	374.189	12.1179	2.98116	Main stem
21/08/2016 08:11	111.826	2.28666	0	4021.08	LI820	33.47	29.8	0.9935	3277.42	0.02963	370.873	412.328	374.189	12.1179	2.98227	Main stem
21/08/2016 08:12	111.826	2.28672	0	4030.25	LI820	33.43	29.8	0.9935	3290.66	0.02963	370.873	412.328	374.189	12.1179	2.99597	Main stem
21/08/2016 08:13	111.826	2.28672	0	4030.25	LI820	33.34	29.8	0.9935	3302.55	0.02963	370.873	412.328	374.189	12.1179	3.00826	Main stem
21/08/2016 08:14	111.826	2.28674	0	4030.26	LI820	33.3	29.8	0.9935	3308.7	0.02963	370.873	412.328	374.189	12.1179	3.01462	Main stem
21/08/2016 08:15	111.826	2.28682	0	4021.1	LI820	33.32	29.8	0.9935	3298	0.02963	370.873	412.328	374.189	12.1179	3.00356	Main stem
21/08/2016 08:16	111.826	2.28674	0	4021.11	LI820	33.31	29.8	0.9935	3299.78	0.02963	370.873	412.328	374.189	12.1179	3.0054	Main stem
21/08/2016 08:17	111.826	2.28675	0	4011.95	LI820	33.26	29.8	0.9935	3298.96	0.02963	370.873	412.328	374.189	12.1179	3.00455	Main stem
21/08/2016 08:18	111.826	2.2868	0	4002.79	LI820	33.23	29.8	0.9935	3296.66	0.02963	370.873	412.328	374.071	12.1199	3.00264	Main stem
21/08/2016 08:19	111.826	2.28673	0	4002.79	LI820	33.2	29.8	0.9935	3300.8	0.02963	370.873	412.328	374.071	12.1199	3.00693	Main stem
21/08/2016 08:20	111.826	2.28677	0	4002.8	LI820	33.16	29.8	0.9935	3306.3	0.02963	370.873	412.328	374.071	12.1199	3.01261	Main stem
21/08/2016 08:21	111.826	2.28684	0	3993.89	LI820	33.15	29.8	0.9935	3299.51	0.02963	370.873	412.328	374.071	12.1199	3.00559	Main stem
21/08/2016 08:22	111.826	2.28676	0	3981.75	LI820	33.14	29.8	0.9934	3291.75	0.02963	370.873	412.328	374.071	12.1199	2.99761	Main stem
21/08/2016 08:23	111.826	2.28673	0	3981.76	LI820	33.08	29.8	0.9934	3299.21	0.02963	370.873	412.328	374.071	12.1199	3.00532	Main stem
21/08/2016 08:24	111.826	2.28674	0	3987.71	LI820	33.06	29.8	0.9934	3307.53	0.02964	370.873	412.328	374.071	12.1199	3.01495	Main stem
21/08/2016 08:25	111.826	2.28675	0	4002.82	LI820	33.03	29.8	0.9934	3324.88	0.02964	370.873	412.328	374.071	12.1199	3.0329	Main stem
21/08/2016 08:26	111.826	2.28674	0	4011.99	LI820	32.99	29.8	0.9934	3338.18	0.02964	370.873	412.328	374.071	12.1199	3.04666	Main stem
21/08/2016 08:27	111.826	2.28674	0	4018.19	LI820	32.95	29.8	0.9934	3347.99	0.02964	370.873	412.328	374.071	12.1199	3.0568	Main stem
21/08/2016 08:28	111.826	2.28673	0	4018.19	LI820	32.94	29.8	0.9934	3350.06	0.02964	370.873	412.328	374.071	12.1199	3.05895	Main stem
21/08/2016 08:29	111.826	2.28672	0	4012	LI820	32.92	29.8	0.9934	3347.33	0.02964	370.873	412.328	374.071	12.1199	3.05612	Main stem
21/08/2016 08:30	111.826	2.28675	0	4012.01	LI820	32.98	29.8	0.9934	3338.89	0.02964	370.873	412.328	374.071	12.1199	3.04739	Main stem
21/08/2016 08:31	111.826	2.28674	0	4018.2	LI820	33.03	29.8	0.9934	3336.95	0.02964	370.873	412.328	374.071	12.1199	3.04538	Main stem
21/08/2016 08:32	111.826	2.28672	0	4012.02	LI820	33.04	29.8	0.9934	3330.32	0.02964	370.873	412.328	374.071	12.1199	3.03852	Main stem
21/08/2016 08:33	111.826	2.28673	0	3993.94	LI820	33.03	29.8	0.9934	3316.64	0.02964	370.873	412.328	374.071	12.1199	3.02437	Main stem
21/08/2016 08:34	111.826	2.28674	0	3987.75	LI820	33.03	29.8	0.9934	3311.28	0.02964	370.873	412.328	374.071	12.1199	3.01882	Main stem
21/08/2016 08:35	111.826	2.28675	0	3987.76	LI820	33.04	29.8	0.9934	3310.14	0.02964	370.873	412.328	373.952	12.1218	3.01812	Main stem
21/08/2016 08:36	111.826	2.28674	0	3987.76	LI820	33.01	29.8	0.9934	3314.78	0.02964	370.873	412.328	373.952	12.1218	3.02292	Main stem
21/08/2016 08:37	111.826	2.28672	0	3987.77	LI820	32.99	29.8	0.9934	3318.01	0.02964	370.873	412.328	373.952	12.1218	3.02627	Main stem
21/08/2016 08:38	111.826	2.28674	0	3987.77	LI820	32.98	29.8	0.9934	3318.15	0.02965	370.873	412.328	373.952	12.1218	3.02743	Main stem
21/08/2016 08:39	111.826	2.28673	0	3987.78	LI820	33.01	29.8	0.9933	3314.94	0.02965	370.873	412.328	373.952	12.1218	3.02415	Main stem
21/08/2016 08:40	111.826	2.28672	0	3987.78	LI820	33.01	29.8	0.9933	3313.86	0.02965	370.873	412.328	373.952	12.1218	3.02303	Main stem
21/08/2016 08:41	111.826	2.28673	0	3966.74	LI820	33.04	29.8	0.9933	3292.48	0.02965	370.873	412.328	373.952	12.1218	3.0009	Main stem
21/08/2016 08:42	111.826	2.28674	0	3878.82	LI820	33.04	29.8	0.9933	3219.94	0.02965	370.873	412.328	373.952	12.1218	2.92582	Main stem
21/08/2016 08:43	111.826	2.28675	0	3878.82	LI820	33.04	29.8	0.9933	3219.6	0.02965	370.873	412.328	373.952	12.1218	2.92546	Main stem
21/08/2016 08:44	111.826	2.28675	0	3896.91	LI820	33.05	29.8	0.9933	3233.13	0.02965	370.873	412.328	373.952	12.1218	2.93947	Main stem
21/08/2016 08:45	111.826	2.28675	0	3906.07	LI820	33.03	29.8	0.9933	3243.35	0.02965	370.873	412.328	373.952	12.1218	2.95005	Main stem
21/08/2016 08:46	111.826	2.28672	0	3921.19	LI820	33.02	29.8	0.9933	3257.93	0.02965	370.873	412.328	373.952	12.1218	2.96514	Main stem
21/08/2016 08:47	111.826	2.28676	0	3933.33	LI820	33	29.8	0.9933	3270.75	0.02965	370.873	412.328	373.952	12.1218	2.97841	Main stem
21/08/2016 08:48	111.826	2.28674	0	3942.5	LI820	32.98	29.8	0.9933	3281.17	0.02965	370.873	412.328	373.952	12.1218	2.9892	Main stem
21/08/2016 08:49	111.826	2.28677	0	3951.42	LI820	32.96	29.8	0.9933	3290.88	0.02965	370.873	412.328	373.952	12.1218	2.99925	Main stem
21/08/2016 08:50	111.826	2.28675	0	3957.61	LI820	32.96	29.8	0.9933	3296.98	0.02965	370.873	412.328	373.952	12.1218	3.00556	Main stem
21/08/2016 08:51	111.826	2.28674	0	3957.62	LI820	32.95	29.8	0.9933	3297.78	0.02965	370.873	412.328	373.952	12.1218	3.00639	Main stem
21/08/2016 08:52	111.826	2.28675	0	3969.76	LI820	32.94	29.8	0.9933	3309.24	0.02966	370.873	412.328	373.952	12.1218	3.01927	Main stem
21/08/2016 08:53	111.826	2.28674	0	3978.93	LI820	32.93	29.8	0.9933	3317.69	0.02966	370.873	412.328	373.834	12.1237	3.0285	Main stem
21/08/2016 08:54	111.826	2.28674	0	3978.93	LI820	32.9	29.8	0.9933	3322.12	0.02966	370.873	412.328	373.834	12.1237	3.03309	Main stem
21/08/2016 08:55	111.826	2.2867	0	3978.94	LI820	32.88	29.8	0.9933	3324.87	0.02966	370.873	412.328	373.834	12.1237	3.03593	Main stem
21/08/2016 08:56	111.826	2.28673	0	3978.94	LI820	32.87	29.8	0.9932	3326.8	0.02966	370.873	412.328	373.834	12.1237	3.03797	Main stem
21/08/2016 08:57	111.826	2.28675	0	3960.62	LI820	32.85	29.8	0.9932	3313.91	0.02966	370.873	412.328	373.834	12.1237	3.02462	Main stem
21/08/2016 08:58	111.826	2.28674	0	3969.79	LI820	32.83	29.8	0.9932	3324.77	0.02966	370.873	412.328	373.834	12.1237	3.03587	Main stem
21/08/2016 08:59	111.826	2.28674	0	3978.96	LI820	32.82	29.8	0.9932	3333.67	0.02966	370.873	412.328	373.834	12.1237	3.04509	Main stem
21/08/2016 09:00	111.826	2.28675	0	3978.96	LI820	32.8	29.8	0.9932	3337.17	0.02966	370.873	412.328	373.834	12.1237	3.04871	Main stem
21/08/2016 09:01	111.826	2.28674	0	3984.91	LI820	32.76	29.8	0.9932	3346.52	0.02966	370.873	412.328	373.834	12.1237	3.0584	Main stem
21/08/2016 09:02	111.826	2.28675	0	3984.91	LI820	32.72	29.8	0.9932	3352.95	0.02966	370.873	412.328	373.834	12.1237	3.06505	Main stem
21/08/2016 09:03	111.826	2.28674	0	3984.92	LI820	32.71	29.81	0.9932	3355.37	0.02966	370.692	412.126	373.652	12.1267	3.06831	Main stem
21/08/2016 09:04	111.826	2.2868	0	3984.92	LI820	32.72	29.81	0.9932	3354.64	0.02966	370.692	412.126	373.652	12.1267	3.06755	Main stem
21/08/2016 09:05	111.826	2.28677	0	3984.93	LI820	32.77	29.81	0.9932	3347.83	0.02965	370.692	412.126	373.652	12.1267	3.05947	Main stem
21/08/2016 09:06	111.826	2.28677	0	3990.88	LI820	32.79	29.82	0.9932	3349.86	0.02965	370.512	411.924	373.47	12.1296	3.06231	Main stem
21/08/2016 09:07	111.826	2.2868	0	3957.69	LI820	32.82	29.82	0.9932	3318.2	0.02965	370.512	411.924	373.47	12.1296	3.02952	Main stem
21/08/2016 09:08	111.826	2.28677	0	3951.51	LI820	32.85	29.83	0.9932	3308.5	0.02965	370.332	411.722	373.288	12.1326	3.02021	Main stem
21/08/2016 09:09	111.826	2.28679	0	3936.4	LI820	32.89	29.83	0.9932	3290.48	0.02964	370.332	411.722	373.288	12.1326	3.00053	Main stem
21/08/2016 09:10	111.826	2.28684	0	3927.49	LI820	32.96	29.83	0.9932	3272.98	0.02964	370.332	411.722	373.288	12.1326	2.9824	Main stem
21/08/2016 09:11	111.826	2.2868	0	3506.19	LI820	32.97	29.84	0.9932	2921.36	0.02964	370.152	411.52	372.989	12.1374	2.61929	Main stem
21/08/2016 09:12	111.826	2.28669	0	3445.51	LI820	33	29.84	0.9932	2866.78	0.02964	370.152	411.52	372.989	12.1374	2.56274	Main stem
21/08/2016 09:13	111.826	2.2867	0	3430.4	LI820	33.02	29.85	0.9931	2852.01	0.02964	369.972	411.319	372.807	12.1404	2.5481	Main stem
21/08/2016 09:14	111.826	2.2867	0	3424.46	LI820	33.07	29.85	0.9931	2841.39	0.02963	369.972	411.319	372.807	12.1404	2.53624	Main stem
21/08/2016 09:15	111.826	2.28671	0	3412.33	LI820	33.14	29.85	0.9931	2823.66	0.02963	369.972	411.319	372.807	12.1404	2.51787	Main stem
21/08/2016 09:16	111.826	2.28673	0	3403.17	LI820	33.18	29.86	0.9931	2810.75	0.02963	369.792	411.117	372.626	12.1433	2.5051	Main stem
21/08/2016 09:17	111.826	2.28673	0	3394.01	LI820	33.21	29.86	0.9931	2799.97	0.02963	369.792	411.117	372.626	12.1433	2.49393	Main stem
21/08/2016 09:18	111.826	2.28669	0	3384.85	LI820	33.28	29.87	0.9931	2784.96	0.02962	369.612	410.916	372.444	12.1463	2.47814	Main stem
21/08/2016 09:19	111.826	2.2867	0	3378.91	LI820	33.38	29.87	0.9931	2768.04	0.02962	369.612	410.916	372.444	12.1463	2.46061	Main stem
21/08/2016 09:20	111.826	2.28673	0	3372.97	LI820	33.46	29.87	0.9931	2754.51	0.02962	369.612	410.916	372.444	12.1463	2.44659	Main stem
21/08/2016 09:21	111.826	2.28676	0	3366.78	LI820	33.53	29.88	0.9931	2740.79	0.02962	369.433	410.714	372.263	12.1493	2.43297	Main stem
21/08/2016 09:22	111.826	2.28673	0	3360.84	LI820	33.59	29.88	0.9931	2729.52	0.02962	369.433	410.714	372.263	12.1493	2.42129	Main stem
21/08/2016 09:23	111.826	2.28672	0	3360.84	LI820	33.65	29.89	0.9931	2723	0.02961	369.253	410.513	372.082	12.1522	2.4143	Main stem
21/08/2016 09:24	111.826	2.2867	0	3381.9	LI820	33.71	29.89	0.9931	2734.46	0.02961	369.253	410.513	372.082	12.1522	2.42618	Main stem
21/08/2016 09:25	111.826	2.28671	0	3424.51	LI820	33.69	29.89	0.9931	2774.41	0.02961	369.253	410.513	372.082	12.1522	2.46758	Main stem
21/08/2016 09:26	111.826	2.2867	0	3312.31	LI820	33.67	29.9	0.9931	2687.18	0.02961	369.073	410.312	371.901	12.1552	2.37776	Main stem
21/08/2016 09:27	111.826	2.28673	0	3306.12	LI820	33.67	29.9	0.9931	2681.87	0.02961	369.073	410.312	371.901	12.1552	2.37226	Main stem
21/08/2016 09:28	111.826	2.2867	0	3288.04	LI820	33.76	29.9	0.9931	2657.3	0.02961	369.073	410.312	371.783	12.1571	2.34716	Main stem
21/08/2016 09:29	111.826	2.28671	0	3309.35	LI820	33.76	29.9	0.9931	2674.32	0.02961	369.073	410.312	371.783	12.1571	2.36481	Main stem
21/08/2016 09:30	111.826	2.2867	0	3300.19	LI820	33.82	29.9	0.993	2660.47	0.02961	369.073	410.312	371.783	12.1571	2.35049	Main stem
21/08/2016 09:31	111.826	2.2867	0	3300.19	LI820	33.89	29.9	0.993	2652.07	0.02961	369.073	410.312	371.783	12.1571	2.34178	Main stem
21/08/2016 09:32	111.826	2.2867	0	3312.33	LI820	33.84	29.9	0.993	2668.25	0.02961	369.073	410.312	371.783	12.1571	2.35856	Main stem
21/08/2016 09:33	111.826	2.28671	0	3324.47	LI820	33.77	29.9	0.993	2686.19	0.02961	369.073	410.312	371.783	12.1571	2.37715	Main stem
21/08/2016 09:34	111.826	2.28671	0	3315.31	LI820	33.73	29.9	0.993	2682.47	0.02961	369.073	410.312	371.783	12.1571	2.3733	Main stem
21/08/2016 09:35	111.826	2.28671	0	3333.4	LI820	33.76	29.9	0.993	2694	0.02961	369.073	410.312	371.783	12.1571	2.38525	Main stem
21/08/2016 09:36	111.826	2.28673	0	3342.57	LI820	33.77	29.9	0.993	2700.7	0.02961	369.073	410.312	371.783	12.1571	2.3922	Main stem
21/08/2016 09:37	111.826	2.2867	0	3324.49	LI820	33.82	29.9	0.993	2680.47	0.02961	369.073	410.312	371.783	12.1571	2.37122	Main stem
21/08/2016 09:38	111.826	2.2867	0	3281.89	LI820	33.75	29.9	0.993	2653.77	0.02961	369.073	410.312	371.783	12.1571	2.34354	Main stem
21/08/2016 09:39	111.826	2.28672	0	3288.09	LI820	33.71	29.9	0.993	2662.98	0.02961	369.073	410.312	371.783	12.1571	2.35309	Main stem
21/08/2016 09:40	111.826	2.28672	0	3327.47	LI820	33.74	29.9	0.993	2691.93	0.02962	369.073	410.312	371.783	12.1571	2.38391	Main stem
21/08/2016 09:41	111.826	2.28669	0	3297.26	LI820	33.65	29.9	0.993	2677.02	0.02962	369.073	410.312	371.783	12.1571	2.36845	Main stem
21/08/2016 09:42	111.826	2.28672	0	3318.32	LI820	33.39	29.9	0.993	2723.64	0.02962	369.073	410.312	371.783	12.1571	2.4168	Main stem
21/08/2016 09:43	111.826	2.28672	0	3357.7	LI820	33.4	29.9	0.993	2755.73	0.02962	369.073	410.312	371.783	12.1571	2.45007	Main stem
21/08/2016 09:44	111.826	2.2867	0	3306.19	LI820	33.41	29.9	0.993	2711.85	0.02962	369.073	410.312	371.783	12.1571	2.40457	Main stem
21/08/2016 09:45	111.826	2.28671	0	3273	LI820	33.41	29.9	0.993	2685.15	0.02962	369.073	410.312	371.783	12.1571	2.37688	Main stem
21/08/2016 09:46	111.826	2.2867	0	3306.2	LI820	33.38	29.9	0.993	2715.55	0.02962	369.073	410.312	371.666	12.159	2.40879	Main stem
21/08/2016 09:47	111.826	2.28669	0	3351.78	LI820	33.24	29.9	0.9929	2769.61	0.02962	369.073	410.312	371.666	12.159	2.4649	Main stem
21/08/2016 09:48	111.826	2.2867	0	3357.72	LI820	33.06	29.9	0.9929	2795.07	0.02962	369.073	410.312	371.666	12.159	2.49131	Main stem
21/08/2016 09:49	111.826	2.28671	0	3324.54	LI820	32.94	29.9	0.9929	2781.55	0.02962	369.073	410.312	371.666	12.159	2.47729	Main stem
21/08/2016 09:50	111.826	2.28669	0	3357.73	LI820	33.1	29.9	0.9929	2790.76	0.02962	369.073	410.312	371.666	12.159	2.48684	Main stem
21/08/2016 09:51	111.826	2.28669	0	3336.68	LI820	33.28	29.9	0.9929	2752.15	0.02962	369.073	410.312	371.666	12.159	2.44679	Main stem
21/08/2016 09:52	111.826	2.28669	0	3369.88	LI820	33.33	29.9	0.9929	2773.26	0.02962	369.073	410.312	371.666	12.159	2.46869	Main stem
21/08/2016 09:53	111.826	2.28671	0	3384.99	LI820	33.09	29.9	0.9929	2814.28	0.02962	369.073	410.312	371.666	12.159	2.51123	Main stem
21/08/2016 09:54	111.826	2.28672	0	3415.46	LI820	33.07	29.9	0.9929	2842.84	0.02963	369.073	410.312	371.666	12.159	2.54172	Main stem
21/08/2016 09:55	111.826	2.28675	0	3406.3	LI820	33.27	29.9	0.9929	2810.55	0.02963	369.073	410.312	371.666	12.159	2.50821	Main stem
21/08/2016 09:56	111.826	2.28672	0	3424.63	LI820	33.34	29.9	0.9929	2818.08	0.02963	369.073	410.312	371.666	12.159	2.51602	Main stem
21/08/2016 09:57	111.826	2.28672	0	3430.58	LI820	33.32	29.9	0.9929	2825.3	0.02963	369.073	410.312	371.666	12.159	2.52352	Main stem
21/08/2016 09:58	111.826	2.28671	0	3382.04	LI820	33.35	29.9	0.9929	2781.34	0.02963	369.073	410.312	371.666	12.159	2.4779	Main stem
21/08/2016 09:59	111.826	2.28671	0	3412.51	LI820	33.39	29.9	0.9929	2801.68	0.02963	369.073	410.312	371.666	12.159	2.49901	Main stem
21/08/2016 10:00	111.826	2.2867	0	3385.02	LI820	33.4	29.9	0.9929	2777.9	0.02963	369.073	410.312	371.666	12.159	2.47433	Main stem
21/08/2016 10:01	111.826	2.28671	0	3385.02	LI820	33.39	29.9	0.9929	2778.8	0.02963	369.073	410.312	371.666	12.159	2.47527	Main stem
21/08/2016 10:02	111.826	2.28671	0	3400.38	LI820	33.3	29.9	0.9929	2802.27	0.02963	369.073	410.312	371.666	12.159	2.49962	Main stem
21/08/2016 10:03	111.826	2.2867	0	3382.06	LI820	33.23	29.9	0.9928	2795.7	0.02963	369.073	410.312	371.666	12.159	2.49284	Main stem
21/08/2016 10:04	111.826	2.28671	0	3382.06	LI820	33.3	29.9	0.9928	2787.34	0.02963	369.073	410.312	371.548	12.1609	2.48456	Main stem
21/08/2016 10:05	111.826	2.2867	0	3388.26	LI820	33.32	29.9	0.9928	2790.7	0.02963	369.073	410.312	371.548	12.1609	2.48805	Main stem
21/08/2016 10:06	111.826	2.2867	0	3379.1	LI820	33.07	29.9	0.9928	2812.86	0.02963	369.073	410.312	371.548	12.1609	2.51105	Main stem
21/08/2016 10:07	111.826	2.2867	0	3324.61	LI820	33.01	29.9	0.9928	2773.25	0.02963	369.073	410.312	371.548	12.1609	2.46994	Main stem
21/08/2016 10:08	111.826	2.28671	0	3330.56	LI820	32.82	29.9	0.9928	2801.53	0.02964	369.073	410.312	371.548	12.1609	2.50013	Main stem
21/08/2016 10:09	111.826	2.28669	0	3364	LI820	32.51	29.9	0.9928	2866.3	0.02964	369.073	410.312	371.548	12.1609	2.56737	Main stem
21/08/2016 10:10	111.826	2.28669	0	3333.54	LI820	32.3	29.9	0.9928	2865.96	0.02964	369.073	410.312	371.548	12.1609	2.56702	Main stem
21/08/2016 10:11	111.826	2.28669	0	3345.68	LI820	32.21	29.9	0.9928	2887.23	0.02964	369.073	410.312	371.548	12.1609	2.5891	Main stem
21/08/2016 10:12	111.826	2.28665	0	3385.07	LI820	32.07	29.9	0.9928	2938.61	0.02964	369.073	410.312	371.548	12.1609	2.64244	Main stem
21/08/2016 10:13	111.826	2.28671	0	3424.7	LI820	32.14	29.9	0.9928	2964.18	0.02964	369.073	410.312	371.548	12.1609	2.66898	Main stem
21/08/2016 10:14	111.826	2.28669	0	3424.71	LI820	32.2	29.9	0.9928	2956.71	0.02964	369.073	410.312	371.548	12.1609	2.66123	Main stem
21/08/2016 10:15	111.826	2.28669	0	3367	LI820	32.31	29.9	0.9928	2893.27	0.02964	369.073	410.312	371.548	12.1609	2.59537	Main stem
21/08/2016 10:16	111.826	2.28667	0	3391.27	LI820	32.45	29.9	0.9928	2897.22	0.02964	369.073	410.312	371.548	12.1609	2.59947	Main stem
21/08/2016 10:17	111.826	2.2867	0	3357.84	LI820	32.54	29.9	0.9928	2858.21	0.02964	369.073	410.312	371.548	12.1609	2.55897	Main stem
21/08/2016 10:18	111.826	2.28669	0	3342.73	LI820	32.52	29.9	0.9928	2847.45	0.02964	369.073	410.312	371.548	12.1609	2.5478	Main stem
21/08/2016 10:19	111.826	2.28669	0	3369.98	LI820	32.46	29.9	0.9928	2877.52	0.02964	369.073	410.312	371.548	12.1609	2.57902	Main stem
21/08/2016 10:20	111.826	2.28667	0	3369.99	LI820	32.42	29.9	0.9927	2882.3	0.02964	369.073	410.312	371.548	12.1609	2.58402	Main stem
21/08/2016 10:21	111.826	2.28667	0	3424.73	LI820	32.31	29.9	0.9927	2943.04	0.02964	369.073	410.312	371.43	12.1629	2.6475	Main stem
21/08/2016 10:22	111.826	2.28668	0	3409.38	LI820	32.33	29.9	0.9927	2927.94	0.02965	369.073	410.312	371.43	12.1629	2.63271	Main stem
21/08/2016 10:23	111.826	2.2867	0	3433.66	LI820	32.37	29.9	0.9927	2943.7	0.02965	369.073	410.312	371.43	12.1629	2.64907	Main stem
21/08/2016 10:24	111.826	2.28669	0	3415.58	LI820	32.41	29.9	0.9927	2922.67	0.02965	369.073	410.312	371.43	12.1629	2.62723	Main stem
21/08/2016 10:25	111.826	2.28668	0	3373.23	LI820	32.51	29.9	0.9927	2874.03	0.02965	369.073	410.312	371.43	12.1629	2.57671	Main stem
21/08/2016 10:26	111.826	2.28668	0	3397.26	LI820	32.5	29.9	0.9927	2895.93	0.02965	369.073	410.312	371.43	12.1629	2.59946	Main stem
21/08/2016 10:27	111.826	2.28672	0	3357.88	LI820	32.53	29.9	0.9927	2858.52	0.02965	369.073	410.312	371.43	12.1629	2.56061	Main stem
21/08/2016 10:28	111.826	2.28668	0	3367.05	LI820	32.49	29.9	0.9927	2871.22	0.02965	369.073	410.312	371.43	12.1629	2.5738	Main stem
21/08/2016 10:29	111.826	2.2867	0	3388.35	LI820	32.41	29.9	0.9927	2899.96	0.02965	369.073	410.312	371.43	12.1629	2.60365	Main stem
21/08/2016 10:30	111.826	2.28668	0	3388.36	LI820	32.39	29.9	0.9927	2902.5	0.02965	369.073	410.312	371.43	12.1629	2.60628	Main stem
21/08/2016 10:31	111.826	2.28669	0	3361.11	LI820	32.4	29.9	0.9927	2877.48	0.02965	369.073	410.312	371.43	12.1629	2.5803	Main stem
21/08/2016 10:32	111.826	2.2867	0	3397.28	LI820	32.44	29.9	0.9927	2903.67	0.02965	369.073	410.312	371.43	12.1629	2.6075	Main stem
21/08/2016 10:33	111.826	2.28667	0	3364.09	LI820	32.49	29.9	0.9927	2869.52	0.02965	369.073	410.312	371.43	12.1629	2.57203	Main stem
21/08/2016 10:34	111.826	2.28666	0	3391.35	LI820	32.56	29.9	0.9927	2883.76	0.02965	369.073	410.312	371.43	12.1629	2.58682	Main stem
21/08/2016 10:35	111.826	2.28668	0	3370.05	LI820	32.56	29.9	0.9927	2865.95	0.02965	369.073	410.312	371.43	12.1629	2.56832	Main stem
21/08/2016 10:36	111.826	2.28666	0	3424.79	LI820	32.58	29.9	0.9927	2909.73	0.02966	369.073	410.312	371.43	12.1629	2.61467	Main stem
21/08/2016 10:37	111.826	2.28672	0	3479.29	LI820	32.61	29.9	0.9926	2952.09	0.02966	369.073	410.312	371.43	12.1629	2.65873	Main stem
21/08/2016 10:38	111.826	2.28667	0	3524.63	LI820	32.61	29.9	0.9926	2990.88	0.02966	369.073	410.312	371.43	12.1629	2.69903	Main stem
21/08/2016 10:39	111.826	2.28667	0	3567.24	LI820	32.57	29.9	0.9926	3031.45	0.02966	369.073	410.312	371.312	12.1648	2.74161	Main stem
21/08/2016 10:40	111.826	2.28668	0	3594.49	LI820	32.53	29.9	0.9926	3060.77	0.02966	369.073	410.312	371.312	12.1648	2.77208	Main stem
21/08/2016 10:41	111.826	2.2867	0	3606.63	LI820	32.52	29.9	0.9926	3072.21	0.02966	369.073	410.312	371.312	12.1648	2.78397	Main stem
21/08/2016 10:42	111.826	2.28668	0	3621.75	LI820	32.48	29.9	0.9926	3089.96	0.02966	369.073	410.312	371.312	12.1648	2.80241	Main stem
21/08/2016 10:43	111.826	2.28671	0	3597.48	LI820	32.54	29.9	0.9926	3061.84	0.02966	369.073	410.312	371.312	12.1648	2.77319	Main stem
21/08/2016 10:44	111.826	2.28669	0	3597.48	LI820	32.5	29.9	0.9928	3066.96	0.02966	369.073	410.312	371.312	12.1648	2.77843	Main stem
21/08/2016 10:45	111.826	2.28668	0	3558.1	LI820	32.56	29.9	0.9928	3025.82	0.02966	369.073	410.312	371.312	12.1648	2.73568	Main stem
21/08/2016 10:46	111.826	2.28667	0	3524.66	LI820	32.5	29.9	0.9928	3004.78	0.02966	369.073	410.312	371.312	12.1648	2.71382	Main stem
21/08/2016 10:47	111.826	2.28666	0	3494.45	LI820	32.43	29.9	0.9928	2988.6	0.02966	369.073	410.312	371.312	12.1648	2.697	Main stem
21/08/2016 10:48	111.826	2.28667	0	3494.45	LI820	32.38	29.9	0.9928	2994.77	0.02966	369.073	410.312	371.312	12.1648	2.70342	Main stem
21/08/2016 10:49	111.826	2.28668	0	3500.4	LI820	32.4	29.9	0.9928	2996.71	0.02966	369.073	410.312	371.312	12.1648	2.70543	Main stem
21/08/2016 10:50	111.826	2.28669	0	3515.76	LI820	32.47	29.9	0.9928	3001.67	0.02967	369.073	410.312	371.312	12.1648	2.7115	Main stem
21/08/2016 10:51	111.826	2.28668	0	3467.21	LI820	32.5	29.9	0.9928	2956.86	0.02967	369.073	410.312	371.312	12.1648	2.66492	Main stem
21/08/2016 10:52	111.826	2.28669	0	3479.36	LI820	32.51	29.9	0.9928	2965.51	0.02967	369.073	410.312	371.312	12.1648	2.67391	Main stem
21/08/2016 10:53	111.826	2.28668	0	3442.95	LI820	32.53	29.9	0.9928	2931.45	0.02967	369.073	410.312	371.312	12.1648	2.63851	Main stem
21/08/2016 10:54	111.826	2.28667	0	3436.76	LI820	32.49	29.9	0.9928	2931.79	0.02967	369.073	410.312	371.312	12.1648	2.63886	Main stem
21/08/2016 10:55	111.826	2.28669	0	3421.65	LI820	32.56	29.9	0.9928	2909.98	0.02967	369.073	410.312	371.312	12.1648	2.61619	Main stem
21/08/2016 10:56	111.826	2.28669	0	3388.46	LI820	32.59	29.9	0.9928	2878.53	0.02967	369.073	410.312	371.194	12.1667	2.58391	Main stem
21/08/2016 10:57	111.826	2.28668	0	3394.41	LI820	32.55	29.9	0.9928	2888.36	0.02967	369.073	410.312	371.194	12.1667	2.59413	Main stem
21/08/2016 10:58	111.826	2.28668	0	3424.88	LI820	32.5	29.9	0.9928	2920.48	0.02967	369.073	410.312	371.194	12.1667	2.62752	Main stem
21/08/2016 10:59	111.826	2.28668	0	3385.25	LI820	32.47	29.9	0.9928	2890.19	0.02967	369.073	410.312	371.194	12.1667	2.59603	Main stem
21/08/2016 11:00	111.826	2.28669	0	3385.26	LI820	32.45	29.9	0.9928	2892.98	0.02967	369.073	410.312	371.194	12.1667	2.59893	Main stem
21/08/2016 11:01	111.826	2.28668	0	3421.68	LI820	32.43	29.9	0.9929	2926.42	0.02967	369.073	410.312	371.194	12.1667	2.63366	Main stem
21/08/2016 11:02	111.826	2.28668	0	3345.88	LI820	32.42	29.9	0.9929	2862.9	0.02967	369.073	410.312	371.194	12.1667	2.56762	Main stem
21/08/2016 11:03	111.826	2.28667	0	3367.19	LI820	32.42	29.9	0.9929	2881.78	0.02967	369.073	410.312	371.194	12.1667	2.58725	Main stem
21/08/2016 11:04	111.826	2.28668	0	3382.3	LI820	32.44	29.9	0.9929	2891.28	0.02968	369.073	410.312	371.194	12.1667	2.598	Main stem
21/08/2016 11:05	111.826	2.28668	0	3370.17	LI820	32.42	29.9	0.9931	2884.2	0.02968	369.073	410.312	371.194	12.1667	2.59055	Main stem
21/08/2016 11:06	111.826	2.28668	0	3385.28	LI820	32.45	29.9	0.9931	2893.99	0.02968	369.073	410.312	371.194	12.1667	2.60073	Main stem
21/08/2016 11:07	111.826	2.28669	0	3418.73	LI820	32.45	29.9	0.9931	2921.89	0.02968	369.073	410.312	371.194	12.1667	2.62975	Main stem
21/08/2016 11:08	111.826	2.28667	0	3388.51	LI820	32.42	29.9	0.9931	2900.27	0.02968	369.073	410.312	371.194	12.1667	2.60726	Main stem
21/08/2016 11:09	111.826	2.28669	0	3388.51	LI820	32.4	29.9	0.9931	2902.47	0.02968	369.073	410.312	371.194	12.1667	2.60955	Main stem
21/08/2016 11:10	111.826	2.28669	0	3418.74	LI820	32.41	29.9	0.9931	2926.71	0.02968	369.073	410.312	371.194	12.1667	2.63476	Main stem
21/08/2016 11:11	111.826	2.28668	0	3418.74	LI820	32.49	29.9	0.9931	2917	0.02968	369.073	410.312	371.194	12.1667	2.62466	Main stem
21/08/2016 11:12	111.826	2.28668	0	3400.66	LI820	32.47	29.9	0.9931	2904.8	0.02968	369.073	410.312	371.194	12.1667	2.61198	Main stem
21/08/2016 11:13	111.826	2.28669	0	3427.92	LI820	32.45	29.9	0.9931	2929.69	0.02968	369.073	410.312	371.194	12.1667	2.63786	Main stem
21/08/2016 11:14	111.826	2.28672	0	3403.64	LI820	32.51	29.9	0.9931	2902.41	0.02968	369.073	410.312	371.076	12.1687	2.6099	Main stem
21/08/2016 11:15	111.826	2.2867	0	3403.65	LI820	32.66	29.9	0.9932	2884.34	0.02968	369.073	410.312	371.076	12.1687	2.59107	Main stem
21/08/2016 11:16	111.826	2.28674	0	3430.9	LI820	32.68	29.9	0.9932	2904.64	0.02968	369.073	410.312	371.076	12.1687	2.61218	Main stem
21/08/2016 11:17	111.826	2.28669	0	3391.52	LI820	32.46	29.9	0.9932	2898.44	0.02968	369.073	410.312	371.076	12.1687	2.60573	Main stem
21/08/2016 11:18	111.826	2.28671	0	3412.83	LI820	32.51	29.9	0.9932	2909.88	0.02969	369.073	410.312	371.076	12.1687	2.61852	Main stem
21/08/2016 11:19	111.826	2.28669	0	3412.83	LI820	32.38	29.9	0.9932	2925.83	0.02969	369.073	410.312	371.076	12.1687	2.63511	Main stem
21/08/2016 11:20	111.826	2.2867	0	3388.56	LI820	32.39	29.9	0.9932	2903.99	0.02969	369.073	410.312	371.076	12.1687	2.61239	Main stem
21/08/2016 11:21	111.826	2.28668	0	3415.81	LI820	32.43	29.9	0.9932	2922.9	0.02969	369.073	410.312	371.076	12.1687	2.63206	Main stem
21/08/2016 11:22	111.826	2.28669	0	3415.81	LI820	32.42	29.9	0.9932	2923.7	0.02969	369.073	410.312	371.076	12.1687	2.63289	Main stem
21/08/2016 11:23	111.826	2.2867	0	3400.71	LI820	32.37	29.9	0.9932	2917.16	0.02969	369.073	410.312	371.076	12.1687	2.62609	Main stem
21/08/2016 11:24	111.826	2.2867	0	3421.77	LI820	32.35	29.9	0.9932	2937.34	0.02969	369.073	410.312	371.076	12.1687	2.64709	Main stem
21/08/2016 11:25	111.826	2.28668	0	3373.47	LI820	32.35	29.9	0.9934	2896.24	0.02969	369.073	410.312	371.076	12.1687	2.60424	Main stem
21/08/2016 11:26	111.826	2.28671	0	3361.33	LI820	32.41	29.9	0.9934	2878.72	0.02969	369.073	410.312	371.076	12.1687	2.58601	Main stem
21/08/2016 11:27	111.826	2.28669	0	3388.59	LI820	32.41	29.9	0.9934	2902.31	0.02969	369.073	410.312	371.076	12.1687	2.61056	Main stem
21/08/2016 11:28	111.826	2.2867	0	3430.95	LI820	32.4	29.9	0.9934	2939.65	0.02969	369.073	410.312	371.076	12.1687	2.64941	Main stem
21/08/2016 11:29	111.826	2.28668	0	3452.26	LI820	32.4	29.9	0.9935	2958.95	0.02969	369.073	410.312	371.076	12.1687	2.66945	Main stem
21/08/2016 11:30	111.826	2.2867	0	3430.96	LI820	32.41	29.9	0.9935	2939.09	0.02969	369.073	410.312	371.076	12.1687	2.64878	Main stem
21/08/2016 11:31	111.826	2.28673	0	3430.96	LI820	32.47	29.9	0.9935	2931.25	0.02969	369.073	410.312	371.076	12.1687	2.64063	Main stem
21/08/2016 11:32	111.826	2.28673	0	3425.02	LI820	32.33	29.9	0.9935	2943.24	0.0297	369.073	410.312	370.959	12.1706	2.65442	Main stem
21/08/2016 11:33	111.826	2.28673	0	3391.58	LI820	32.28	29.9	0.9935	2920.94	0.0297	369.073	410.312	370.959	12.1706	2.6312	Main stem
21/08/2016 11:34	111.826	2.28674	0	3421.81	LI820	32.27	29.9	0.9935	2948.21	0.0297	369.073	410.312	370.959	12.1706	2.65959	Main stem
21/08/2016 11:35	111.826	2.28669	0	3388.62	LI820	32.19	29.9	0.9935	2929.45	0.0297	369.073	410.312	370.959	12.1706	2.64006	Main stem
21/08/2016 11:36	111.826	2.28672	0	3388.62	LI820	32.16	29.9	0.9935	2933.27	0.0297	369.073	410.312	370.959	12.1706	2.64404	Main stem
21/08/2016 11:37	111.826	2.28671	0	3412.9	LI820	32.24	29.9	0.9935	2945.01	0.0297	369.073	410.312	370.959	12.1706	2.65626	Main stem
21/08/2016 11:38	111.826	2.28672	0	3376.49	LI820	32.35	29.9	0.9935	2899.24	0.0297	369.073	410.312	370.959	12.1706	2.60861	Main stem
21/08/2016 11:39	111.826	2.28668	0	3394.58	LI820	32.51	29.9	0.9935	2895.73	0.0297	369.073	410.312	370.959	12.1706	2.60496	Main stem
21/08/2016 11:40	111.826	2.28669	0	3385.42	LI820	32.45	29.9	0.9937	2894.79	0.0297	369.073	410.312	370.959	12.1706	2.6039	Main stem
21/08/2016 11:41	111.826	2.28667	0	3385.42	LI820	32.27	29.9	0.9937	2917.75	0.0297	369.073	410.312	370.959	12.1706	2.6278	Main stem
21/08/2016 11:42	111.826	2.2867	0	3400.78	LI820	32.26	29.9	0.9937	2931.63	0.0297	369.073	410.312	370.959	12.1706	2.64225	Main stem
21/08/2016 11:43	111.826	2.28669	0	3406.73	LI820	32.24	29.9	0.9937	2939.49	0.0297	369.073	410.312	370.959	12.1706	2.65043	Main stem
21/08/2016 11:44	111.826	2.28667	0	3397.57	LI820	32.31	29.9	0.9938	2923.13	0.0297	369.073	410.312	370.959	12.1706	2.63336	Main stem
21/08/2016 11:45	111.826	2.28669	0	3406.74	LI820	32.41	29.9	0.9938	2918.77	0.0297	369.073	410.312	370.959	12.1706	2.62882	Main stem
21/08/2016 11:46	111.826	2.28667	0	3406.74	LI820	32.47	29.9	0.9938	2911.82	0.02971	369.073	410.312	370.959	12.1706	2.62247	Main stem
21/08/2016 11:47	111.826	2.28669	0	3421.86	LI820	32.53	29.9	0.9938	2916.96	0.02971	369.073	410.312	370.959	12.1706	2.62782	Main stem
21/08/2016 11:48	111.826	2.28668	0	3409.73	LI820	32.53	29.9	0.9938	2906.12	0.02971	369.073	410.312	370.959	12.1706	2.61653	Main stem
21/08/2016 11:49	111.826	2.28669	0	3409.73	LI820	32.56	29.9	0.9938	2903.37	0.02971	369.073	410.312	370.841	12.1725	2.61408	Main stem
21/08/2016 11:50	111.826	2.28668	0	3425.09	LI820	32.43	29.9	0.9938	2932.42	0.02971	369.073	410.312	370.841	12.1725	2.64434	Main stem
21/08/2016 11:51	111.826	2.28668	0	3449.13	LI820	32.25	29.9	0.9938	2974.87	0.02971	369.073	410.312	370.841	12.1725	2.68855	Main stem
21/08/2016 11:52	111.826	2.28669	0	3455.32	LI820	32.27	29.9	0.9938	2978.65	0.02971	369.073	410.312	370.841	12.1725	2.69249	Main stem
21/08/2016 11:53	111.826	2.28669	0	3470.44	LI820	32.35	29.9	0.9938	2981.26	0.02971	369.073	410.312	370.841	12.1725	2.69521	Main stem
21/08/2016 11:54	111.826	2.28667	0	3437	LI820	32.29	29.9	0.9938	2960.5	0.02971	369.073	410.312	370.841	12.1725	2.67359	Main stem
21/08/2016 11:55	111.826	2.28669	0	3418.92	LI820	32.21	29.9	0.9939	2954.34	0.02971	369.073	410.312	370.841	12.1725	2.66713	Main stem
21/08/2016 11:56	111.826	2.28668	0	3440.23	LI820	32.25	29.9	0.9939	2968.09	0.02971	369.073	410.312	370.841	12.1725	2.68145	Main stem
21/08/2016 11:57	111.826	2.28667	0	3428.09	LI820	32.33	29.9	0.9939	2947.07	0.02971	369.073	410.312	370.841	12.1725	2.65956	Main stem
21/08/2016 11:58	111.826	2.28667	0	3409.77	LI820	32.35	29.9	0.9939	2928.88	0.02971	369.073	410.312	370.841	12.1725	2.64061	Main stem
21/08/2016 11:59	111.826	2.28667	0	3425.13	LI820	32.26	29.9	0.9939	2954.44	0.02971	369.073	410.312	370.841	12.1725	2.66723	Main stem
21/08/2016 12:00	111.826	2.28668	0	3425.13	LI820	32.22	29.9	0.9939	2959.11	0.02972	369.073	410.312	370.841	12.1725	2.673	Main stem
21/08/2016 12:01	111.826	2.28666	0	3425.14	LI820	32.19	29.9	0.9939	2962.98	0.02972	369.073	410.312	370.841	12.1725	2.67703	Main stem
21/08/2016 12:02	111.826	2.28666	0	3443.23	LI820	32.34	29.9	0.9939	2959.06	0.02972	369.073	410.312	370.841	12.1725	2.67295	Main stem
21/08/2016 12:03	111.826	2.2867	0	3455.37	LI820	32.45	29.9	0.9939	2956.73	0.02972	369.073	410.312	370.841	12.1725	2.67052	Main stem
21/08/2016 12:04	111.826	2.28668	0	3409.79	LI820	32.35	29.9	0.9939	2929.13	0.02972	369.073	410.312	370.841	12.1725	2.64176	Main stem
21/08/2016 12:05	111.826	2.28669	0	3431.1	LI820	32.33	29.9	0.9939	2950.85	0.02972	369.073	410.312	370.841	12.1725	2.66439	Main stem
21/08/2016 12:06	111.826	2.28666	0	3421.94	LI820	32.29	29.9	0.9939	2947.93	0.02972	369.073	410.312	370.841	12.1725	2.66135	Main stem
21/08/2016 12:07	111.826	2.28665	0	3400.88	LI820	32.27	29.9	0.9939	2931.96	0.02972	369.073	410.312	370.723	12.1745	2.64513	Main stem
21/08/2016 12:08	111.826	2.28667	0	3421.94	LI820	32.15	29.9	0.9939	2965.07	0.02972	369.073	410.312	370.723	12.1745	2.67963	Main stem
21/08/2016 12:09	111.826	2.28667	0	3403.86	LI820	32.18	29.9	0.9939	2945.93	0.02972	369.073	410.312	370.723	12.1745	2.65969	Main stem
21/08/2016 12:10	111.826	2.28666	0	3443.26	LI820	32.16	29.9	0.9939	2982.71	0.02972	369.073	410.312	370.723	12.1745	2.69801	Main stem
21/08/2016 12:11	111.826	2.28667	0	3425.18	LI820	32.18	29.9	0.9939	2963.77	0.02972	369.073	410.312	370.723	12.1745	2.67828	Main stem
21/08/2016 12:12	111.826	2.28667	0	3385.54	LI820	32.22	29.9	0.9939	2924.65	0.02972	369.073	410.312	370.723	12.1745	2.63751	Main stem
21/08/2016 12:13	111.826	2.28669	0	3416.02	LI820	32.21	29.9	0.9939	2952.02	0.02972	369.073	410.312	370.723	12.1745	2.66603	Main stem
21/08/2016 12:14	111.826	2.28668	0	3382.58	LI820	32.2	29.9	0.9939	2924.72	0.02973	369.073	410.312	370.723	12.1745	2.63847	Main stem
21/08/2016 12:15	111.826	2.28669	0	3419	LI820	32.26	29.9	0.9939	2949.04	0.02973	369.073	410.312	370.723	12.1745	2.66382	Main stem
21/08/2016 12:16	111.826	2.28668	0	3434.12	LI820	32.2	29.9	0.9939	2969.57	0.02973	369.073	410.312	370.723	12.1745	2.68522	Main stem
21/08/2016 12:17	111.826	2.2867	0	3434.12	LI820	32.23	29.9	0.9939	2965.98	0.02973	369.073	410.312	370.723	12.1745	2.68148	Main stem
21/08/2016 12:18	111.826	2.28667	0	3461.38	LI820	32.23	29.9	0.9939	2988.36	0.02973	369.073	410.312	370.723	12.1745	2.70481	Main stem
21/08/2016 12:19	111.826	2.28669	0	3485.66	LI820	32.25	29.9	0.9941	3008.18	0.02973	369.073	410.312	370.723	12.1745	2.72539	Main stem
21/08/2016 12:20	111.826	2.28668	0	3458.41	LI820	32.27	29.9	0.9941	2982.04	0.02973	369.073	410.312	370.723	12.1745	2.69814	Main stem
21/08/2016 12:21	111.826	2.28668	0	3470.55	LI820	32.28	29.9	0.9941	2990.69	0.02973	369.073	410.312	370.723	12.1745	2.70716	Main stem
21/08/2016 12:22	111.826	2.28671	0	3491.86	LI820	32.19	29.9	0.9941	3020.44	0.02973	369.073	410.312	370.723	12.1745	2.73817	Main stem
21/08/2016 12:23	111.826	2.28668	0	3491.87	LI820	32.11	29.9	0.9942	3031.81	0.02973	369.073	410.312	370.723	12.1745	2.74998	Main stem
21/08/2016 12:24	111.826	2.2867	0	3479.73	LI820	32.08	29.9	0.9942	3024.35	0.02973	369.073	410.312	370.723	12.1745	2.7422	Main stem
21/08/2016 12:25	111.826	2.28668	0	3516.15	LI820	31.88	29.9	0.9942	3082.19	0.02973	369.073	410.312	370.605	12.1764	2.80294	Main stem
21/08/2016 12:26	111.826	2.28668	0	3531.27	LI820	31.79	29.9	0.9942	3107.32	0.02973	369.073	410.312	370.605	12.1764	2.82914	Main stem
21/08/2016 12:27	111.826	2.2867	0	3540.19	LI820	31.73	29.9	0.9942	3123.66	0.02973	369.073	410.312	370.605	12.1764	2.84618	Main stem
21/08/2016 12:28	111.826	2.28668	0	3494.86	LI820	31.73	29.9	0.9942	3083.62	0.02974	369.073	410.312	370.605	12.1764	2.80538	Main stem
21/08/2016 12:29	111.826	2.28668	0	3522.12	LI820	31.89	29.9	0.9942	3086.74	0.02974	369.073	410.312	370.605	12.1764	2.80863	Main stem
21/08/2016 12:30	111.826	2.28669	0	3452.51	LI820	31.93	29.9	0.9944	3020.77	0.02974	369.073	410.312	370.605	12.1764	2.73975	Main stem
21/08/2016 12:31	111.826	2.28668	0	3467.62	LI820	31.84	29.9	0.9944	3046.33	0.02974	369.073	410.312	370.605	12.1764	2.7664	Main stem
21/08/2016 12:32	111.826	2.28669	0	3467.63	LI820	31.83	29.9	0.9944	3047.74	0.02974	369.073	410.312	370.605	12.1764	2.76787	Main stem
21/08/2016 12:33	111.826	2.28668	0	3488.69	LI820	31.92	29.9	0.9944	3054.5	0.02974	369.073	410.312	370.605	12.1764	2.77492	Main stem
21/08/2016 12:34	111.826	2.28668	0	3507.02	LI820	31.95	29.9	0.9944	3066.26	0.02974	369.073	410.312	370.605	12.1764	2.78719	Main stem
21/08/2016 12:35	111.826	2.28669	0	3507.03	LI820	31.95	29.9	0.9944	3066.85	0.02974	369.073	410.312	370.605	12.1764	2.7878	Main stem
21/08/2016 12:36	111.826	2.28669	0	3516.2	LI820	31.91	29.9	0.9944	3078.82	0.02974	369.073	410.312	370.605	12.1764	2.80029	Main stem
21/08/2016 12:37	111.826	2.28668	0	3525.12	LI820	31.92	29.9	0.9944	3085.27	0.02974	369.073	410.312	370.605	12.1764	2.80701	Main stem
21/08/2016 12:38	111.826	2.28672	0	3510.01	LI820	31.95	29.9	0.9945	3069.46	0.02974	369.073	410.312	370.605	12.1764	2.79048	Main stem
21/08/2016 12:39	111.826	2.28671	0	3516.21	LI820	31.85	29.9	0.9945	3087.61	0.02974	369.073	410.312	370.605	12.1764	2.80941	Main stem
21/08/2016 12:40	111.826	2.2867	0	3543.47	LI820	31.77	29.9	0.9945	3121.59	0.02974	369.073	410.312	370.605	12.1764	2.84485	Main stem
21/08/2016 12:41	111.826	2.2867	0	3558.58	LI820	31.89	29.9	0.9945	3119.84	0.02974	369.073	410.312	370.605	12.1764	2.84303	Main stem
21/08/2016 12:42	111.826	2.28667	0	3534.31	LI820	31.99	29.89	0.9945	3084.02	0.02975	369.253	410.513	370.668	12.1754	2.80638	Main stem
21/08/2016 12:43	111.826	2.28667	0	3549.43	LI820	32.01	29.87	0.9945	3091.84	0.02977	369.612	410.916	371.028	12.1695	2.81506	Main stem
21/08/2016 12:44	111.826	2.28666	0	3567.76	LI820	32.03	29.85	0.9945	3102.33	0.02979	369.972	411.319	371.389	12.1635	2.82653	Main stem
21/08/2016 12:45	111.826	2.2867	0	3519.21	LI820	32.12	29.83	0.9945	3046.29	0.0298	370.332	411.722	371.751	12.1576	2.76763	Main stem
21/08/2016 12:46	111.826	2.28669	0	3534.33	LI820	32.16	29.81	0.9945	3051.39	0.02982	370.692	412.126	372.113	12.1517	2.77346	Main stem
21/08/2016 12:47	111.826	2.28669	0	3522.19	LI820	32.15	29.8	0.9945	3040.5	0.02982	370.873	412.328	372.294	12.1487	2.76142	Main stem
21/08/2016 12:48	111.826	2.28669	0	3485.78	LI820	32.19	29.8	0.9945	3004.56	0.02982	370.873	412.328	372.294	12.1487	2.72392	Main stem
21/08/2016 12:49	111.826	2.28668	0	3507.09	LI820	32.08	29.8	0.9945	3036.86	0.02982	370.873	412.328	372.294	12.1487	2.75762	Main stem
21/08/2016 12:50	111.826	2.28667	0	3507.09	LI820	32.12	29.8	0.9945	3032.4	0.02983	370.873	412.328	372.294	12.1487	2.75389	Main stem
21/08/2016 12:51	111.826	2.28669	0	3494.96	LI820	32.2	29.8	0.9945	3010.85	0.02983	370.873	412.328	372.294	12.1487	2.7314	Main stem
21/08/2016 12:52	111.826	2.28668	0	3510.07	LI820	32.17	29.8	0.9945	3028.48	0.02983	370.873	412.328	372.294	12.1487	2.7498	Main stem
21/08/2016 12:53	111.826	2.28669	0	3467.71	LI820	32.14	29.8	0.9945	2995.27	0.02983	370.873	412.328	372.294	12.1487	2.71514	Main stem
21/08/2016 12:54	111.826	2.28671	0	3488.77	LI820	32.24	29.8	0.9945	3000.88	0.02983	370.873	412.328	372.294	12.1487	2.721	Main stem
21/08/2016 12:55	111.826	2.28668	0	3443.44	LI820	32.29	29.8	0.9947	2955.9	0.02983	370.873	412.328	372.294	12.1487	2.67397	Main stem
21/08/2016 12:56	111.826	2.28667	0	3443.44	LI820	32.33	29.8	0.9947	2950.68	0.02983	370.873	412.328	372.294	12.1487	2.66852	Main stem
21/08/2016 12:57	111.826	2.28668	0	3455.59	LI820	32.16	29.8	0.9947	2983.11	0.02983	370.873	412.328	372.294	12.1487	2.70237	Main stem
21/08/2016 12:58	111.826	2.28669	0	3519.26	LI820	32.11	29.8	0.9947	3043.85	0.02983	370.873	412.328	372.294	12.1487	2.76576	Main stem
21/08/2016 12:59	111.826	2.2867	0	3546.52	LI820	32.33	29.8	0.9947	3039.85	0.02983	370.873	412.328	372.294	12.1487	2.76159	Main stem
21/08/2016 13:00	111.826	2.28672	0	3555.69	LI820	32.56	29.8	0.9947	3018.12	0.02983	370.873	412.328	372.176	12.1507	2.73934	Main stem
21/08/2016 13:01	111.826	2.28672	0	3573.78	LI820	32.47	29.8	0.9948	3044.75	0.02983	370.873	412.328	372.176	12.1507	2.7671	Main stem
21/08/2016 13:02	111.826	2.28671	0	3528.45	LI820	32.56	29.81	0.9948	2996.58	0.02983	370.692	412.126	371.995	12.1536	2.71748	Main stem
21/08/2016 13:03	111.826	2.28671	0	3567.84	LI820	32.78	29.83	0.9948	3003.92	0.02981	370.332	411.722	371.633	12.1596	2.72464	Main stem
21/08/2016 13:04	111.826	2.28671	0	3598.07	LI820	32.85	29.85	0.9948	3023.17	0.0298	369.972	411.319	371.271	12.1655	2.74515	Main stem
[truncated: 3,049 more rows]

## Sheet: Aug2016_O2
Time	Longitude	Latitude	Salinity	T (deg C)	O2 (mg/L)	O2 (sat, %)	Location
[truncated: 1,545 more rows]

## Sheet: Aug2016_Ancillary
Station	Date Time LT (Moritz)	Date Time GMT (Aliki)	Latitude	Longitude	DO WTW (mg/L)	T (deg C)	Salinity	pH WTW	DO WTW (mg/L)	SPM (mg/L)	+/- SPM (mg/L)	pCO2	FTIR/Li-time	POC (mg/L)	+/- POC (mg/L)	Corg (%)	DIC (uM)	d13C-DIC (o/oo)
[truncated: 36 more rows]
